# Supplementary material for: Construction and transformations of 2,2-difluoro-2,3-dihydrofurans from enaminones and diflurocarbene
Source: Royal Society of Chemistry journal article supplement (doi:10.1039/d2qo00468b), 2022-01-01

## Supporting Information

*for*

### **Construction and transformations of 2,2-difluoro-2,3-dihydrofurans from enaminones and difluorocarbene**

Heyun Sheng<sup>a</sup>, Zhiwei Chen<sup>a</sup>, Xue Li<sup>a</sup>, Jianke Su<sup>a</sup> and Qiuling Song<sup>a, b, c\*</sup>

*<sup>a</sup>Institute of Next Generation Matter Transformation, College of Material Sciences Engineering at Huaqiao University, 668 Jimei Blvd, Xiamen, Fujian, 361021, E-mail: [qsong@hqu.edu.cn](mailto:qsong@hqu.edu.cn)*

*<sup>b</sup>School of Chemistry and Chemical Engineering, Henan Normal University, Xinxiang, Henan, 453007*

*<sup>c</sup>Guangdong Provincial Key Laboratory of Catalysis, Southern University of Science and Technology, Shenzhen, Guangdong, 518055.*

## Table of Contents

|                                                           |           |
|-----------------------------------------------------------|-----------|
| <b>1. General Information.....</b>                        | <b>3</b>  |
| <b>2. Material Synthesis .....</b>                        | <b>4</b>  |
| General procedure A for the synthesis of enaminones.....  | 4         |
| General procedure B for the synthesis of enaminones ..... | 4         |
| <b>3. Experimental Procedures.....</b>                    | <b>5</b>  |
| Conditions A.....                                         | 5         |
| Conditions B.....                                         | 5         |
| Conditions C.....                                         | 6         |
| Conditions D.....                                         | 6         |
| <b>4. Explorations and optimization .....</b>             | <b>6</b>  |
| <b>5. Characterization of Products.....</b>               | <b>8</b>  |
| <b>6. Crystal Data .....</b>                              | <b>60</b> |
| Crystal data of 4r .....                                  | 60        |
| Crystal data of 5k.....                                   | 62        |
| Crystal data of 5u.....                                   | 64        |
| <b>7. NMR Spectra.....</b>                                | <b>66</b> |

## 1. General Information

All chemicals were purchased from Adamas Reagent, Ltd, Energy chemical company, J&K Scientific Ltd, Alfa Aesa chemical company and so forth. Anhydrous solvents are commercially available (energy) and stored in a glove box. Unless otherwise stated, all experiments were conducted in a seal tube under air atmosphere. Reactions were monitored by TLC or GC-MS analysis. Flash column chromatography was performed over silica gel (200-300 mesh).  $^1\text{H-NMR}$  and  $^{13}\text{C-NMR}$  spectra were recorded in  $\text{CDCl}_3$  on a Bruker Avance 500 spectrometer (500 MHz  $^1\text{H}$ , 126 MHz  $^{13}\text{C}$ , 471 MHz  $^{19}\text{F}$ ) at room temperature. Chemical shifts were reported in ppm on the scale relative to  $\text{CDCl}_3$  ( $\delta = 7.26$  for  $^1\text{H-NMR}$ ,  $\delta = 77.00$  for  $^{13}\text{C-NMR}$ ) as an internal reference. Chemical shifts were reported in ppm on the scale relative to  $\text{DMSO-d}_6$  ( $\delta = 2.51$  for  $^1\text{H-NMR}$ ,  $\delta = 40.00$  for  $^{13}\text{C-NMR}$ ) as an internal reference. High resolution mass spectra were recorded using Q-TOF time-of-flight mass spectrometer. Coupling constants ( $J$ ) were reported in Hertz (Hz). Oil bath was used as heating source.

## 2. Material Synthesis

### General procedure A for the synthesis of enaminones

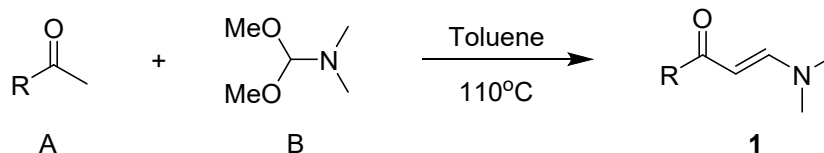

To a stirred solution of ketone **A** (5.0 mmol, 1.0 equiv.) in toluene (5 mL), 1,1-dimethoxy N, N-dimethylmethanamine **B** (7.0 mmol, 1.4 equiv.) was added and stirred at 110 °C. After completion of the reaction (monitored by TLC), it was quenched with water, extracted with ethyl acetate and dried with anhydrous Na<sub>2</sub>SO<sub>4</sub>. Then the reaction mixture was concentrated under reduced pressure and purified by column chromatography (petroleum ether: ethyl acetate = 1: 1) to give the desired product **1**.

### General procedure B for the synthesis of enaminones

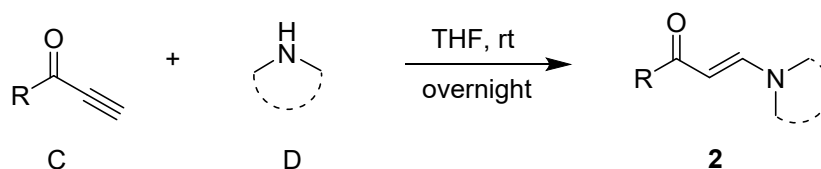

To a stirred solution of **C** (5.0 mmol, 1.0 equiv.) in THF (10 mL), amine **D** (12.0 mmol, 2.4 equiv.) was added dropwise and stirred at room temperature. After completion of the reaction (monitored by TLC), the reaction mixture is concentrated under reduced pressure and purified by column chromatography (petroleum ether: ethyl acetate) to give the desired product **2**.

### 3. Experimental Procedures

#### Conditions A

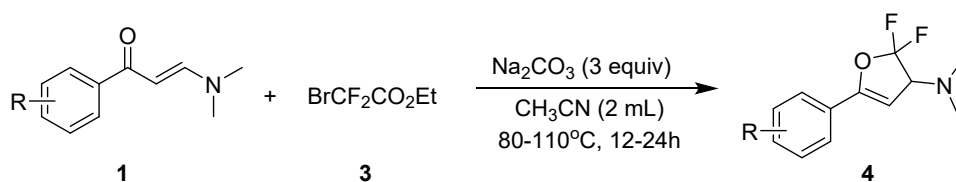

In air, a 25 mL Schlenk tube was charged with **1** (0.2 mmol, 1 equiv) and  $\text{Na}_2\text{CO}_3$  (63.6 mg, 3 equiv). The tube was evacuated and filled with nitrogen three times. Then,  $\text{CH}_3\text{CN}$  (2 mL) and  $\text{BrCF}_2\text{CO}_2\text{Et}$  (103  $\mu\text{L}$ , 4 equiv) were added and immersed into an oil bath preheated at  $80-110^\circ\text{C}$ . The reaction was allowed to stir for 12-24 h. Upon completion, removal of the solvent, the crude reaction mixture was purified on silica gel (petroleum ether: ethyl acetate) to afford the desired product **4**.

#### Conditions B

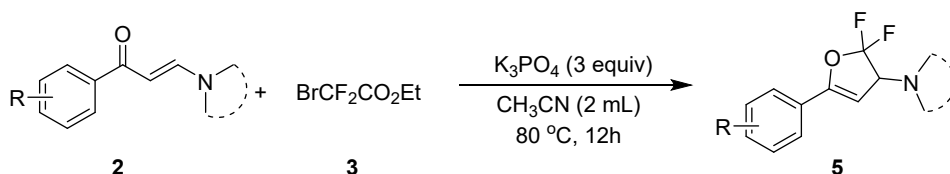

In air, a 25 mL Schlenk tube was charged with **2** (0.2 mmol, 1 equiv) and  $\text{K}_3\text{PO}_4$  (127.2 mg, 3 equiv). The tube was evacuated and filled with nitrogen three times. Then,  $\text{CH}_3\text{CN}$  (2 mL) and  $\text{BrCF}_2\text{CO}_2\text{Et}$  (77  $\mu\text{L}$ , 3 equiv) were added and immersed into an oil bath preheated at  $80^\circ\text{C}$ . The reaction was allowed to stir for 12 h. Upon completion, removal of the solvent, the crude reaction mixture was purified on silica gel (petroleum ether: ethyl acetate) to afford the desired product **5**.

### Conditions C

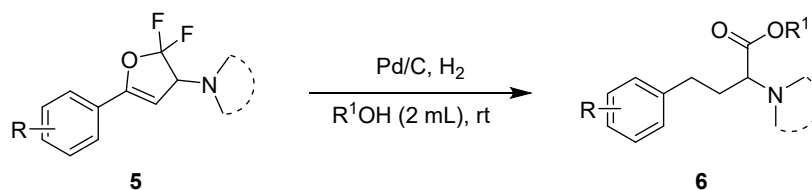

In air, a 25 mL Schlenk tube was charged with 5% Pd/C (20 mg), and the Schlenk tube was evacuated and filled with hydrogen. compound **5** (0.2 mmol, 1 equiv) was dissolved in R<sup>1</sup>OH and added under hydrogen atmosphere. subsequently, the reaction was allowed to stir for 12 h at room temperature. Upon completion, removal of the solvent, the crude reaction mixture was purified on silica gel (petroleum ether: ethyl acetate) to afford the desired product **6**.

### Conditions D

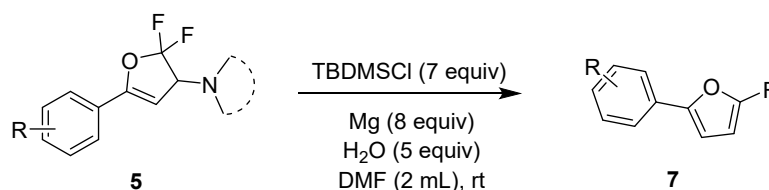

In air, a 25 mL Schlenk tube was charged with Mg (38.4 mg, 8 equiv). The tube was evacuated and filled with nitrogen three times. Compound **5** (0.2 mmol, 1 equiv) was weighed and dissolved in DMF. The weighed H<sub>2</sub>O (18  $\mu$ L, 5 equiv) and tert-butyldimethylsilyl chloride (211.0 mg, 7 equiv) were added to the mixture in turn. the reaction was allowed to stir for 4 h at room temperature. After completion of the reaction, it was quenched with NH<sub>4</sub>Cl, extracted with ethyl acetate and dried with anhydrous Na<sub>2</sub>SO<sub>4</sub>. Then the reaction mixture was concentrated under reduced pressure and purified by column chromatography (petroleum ether) to afford the desired product **7**.

## 4. Explorations and optimizations

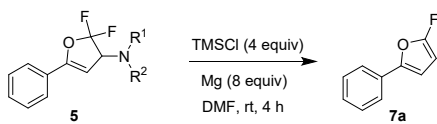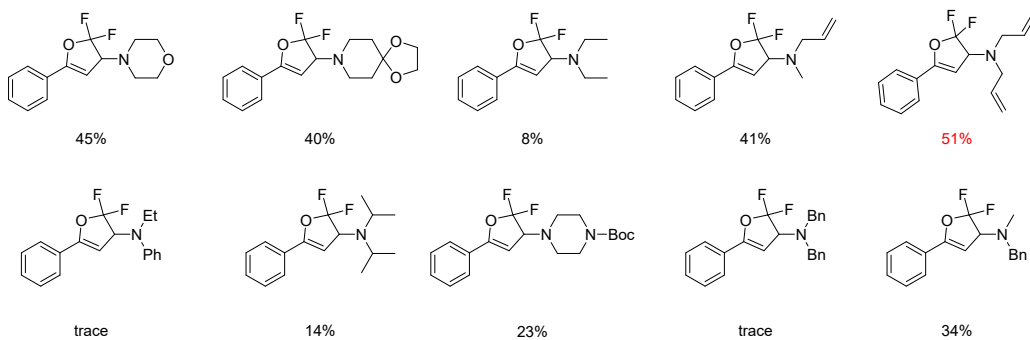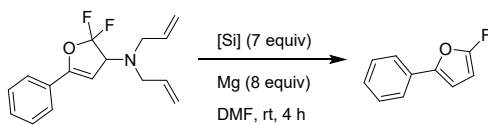

| entry | [Si]        | yield (%) |
|-------|-------------|-----------|
| 1     | TBDMSCl     | 61        |
| 2     | TIPSCl      | 53        |
| 3     | TESCl       | trace     |
| 4     | <b>Si 4</b> | trace     |

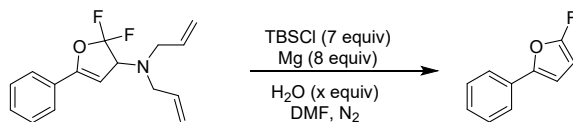

| entry | H <sub>2</sub> O (x equiv) | yield(%) |
|-------|----------------------------|----------|
| 1     | 0                          | 61       |
| 2     | 5                          | 82       |
| 3     | 10                         | 78       |
| 4     | 20                         | trace    |

## 5. Characterization of Products

### 2,2-difluoro-N,N-dimethyl-5-phenyl-2,3-dihydrofuran-3-amine (4a)

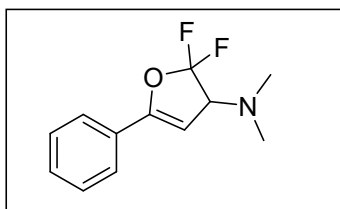

Following the experimental procedures (Condition A) on 0.2 mmol scale, yellow oil, yield: 82% (36.9 mg), column chromatography (silica gel, PE: EA = 15:1, v/v).

**<sup>1</sup>H NMR (500 MHz, Chloroform-*d*)**  $\delta$  7.63 – 7.58 (m, 2H), 7.43 – 7.37 (m, 3H), 5.56 (t, *J* = 2.5 Hz, 1H), 4.16 (ddd, *J* = 15.1, 7.3, 2.7 Hz, 1H), 2.49 (s, 6H).

**<sup>19</sup>F NMR (471 MHz, Chloroform-*d*)**  $\delta$  -61.3 (d, *J* = 150.8 Hz), -83.8 (d, *J* = 150.5 Hz).

**<sup>13</sup>C NMR (126 MHz, Chloroform-*d*)**  $\delta$  154.4 (d, *J* = 3.6 Hz), 131.224 (dd, *J* = 274.1, 271.2 Hz), 129.9, 128.6, 128.3, 125.4, 97.4 (d, *J* = 3.1 Hz), 71.1 (dd, *J* = 34.5, 19.0 Hz), 41.2 (d, *J* = 2.8 Hz).

**HRMS (ESI) *m/z***: [*M*+*H*]<sup>+</sup> Calcd. for C<sub>12</sub>H<sub>14</sub>F<sub>2</sub>NO<sup>+</sup> 226.1038; 226.1041

### 2,2-difluoro-N,N-dimethyl-5-(*o*-tolyl)-2,3-dihydrofuran-3-amine (4b)

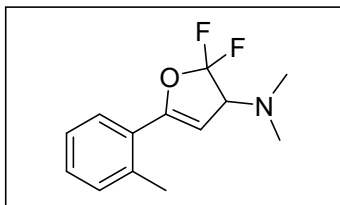

Following the experimental procedures (Condition A) on 0.2 mmol scale, yellow oil, yield: 70% (33.5 mg), column chromatography (silica gel, PE: EA = 15:1, v/v).

**<sup>1</sup>H NMR (500 MHz, Chloroform-*d*)**  $\delta$  7.58 (dd, *J* = 8.1, 1.5 Hz, 1H), 7.33 (td, *J* = 7.4, 1.5 Hz, 1H), 7.26 (td, *J* = 6.4, 5.9, 3.0 Hz, 2H), 5.37 (t, *J* = 2.4 Hz, 1H), 4.19 (ddd, *J* = 15.2, 7.2, 2.7 Hz, 1H), 2.54 (s, 6H), 2.49 (s, 3H).

**<sup>19</sup>F NMR (471 MHz, Chloroform-*d*)**  $\delta$  -61.8 (d, *J* = 151.6 Hz), -85.0 (dd, *J* = 151.3, 3.0 Hz).

**<sup>13</sup>C NMR (126 MHz, Chloroform-*d*)**  $\delta$  154.6 (d, *J* = 3.6 Hz), 136.7, 131.1, 130.8 (dd, *J* = 273.2, 270.4 Hz), 129.7, 128.2, 128.1, 125.9, 101.8 (d, *J* = 2.8 Hz), 71.1 (dd, *J* = 34.6, 19.0 Hz), 41.2 (d, *J* = 2.7 Hz), 21.4.



**HRMS (ESI) m/z:** [M+H]<sup>+</sup> Calcd. for C<sub>13</sub>H<sub>16</sub>F<sub>2</sub>NO<sup>+</sup> 240.1194; Found: 240.1193.

**2,2-difluoro-N,N-dimethyl-5-(m-tolyl)-2,3-dihydrofuran-3-amine (4c)**

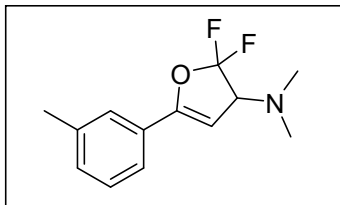

Following the experimental procedures (Condition A) on 0.2 mmol scale, yellow oil, yield: 53% (25.3 mg), column chromatography (silica gel, PE: EA = 15:1, v/v).

**<sup>1</sup>H NMR (500 MHz, Chloroform-*d*)** δ 7.44 – 7.39 (m, 2H), 7.29 (t, *J* = 7.6 Hz, 1H), 7.20 (d, *J* = 7.6 Hz, 1H), 5.53 (t, *J* = 2.4 Hz, 1H), 4.15 (ddd, *J* = 15.1, 7.3, 2.7 Hz, 1H), 2.49 (s, 6H), 2.38 (s, 3H).

**<sup>19</sup>F NMR (471 MHz, Chloroform-*d*)** δ -61.3 (d, *J* = 150.8 Hz), -83.9 (d, *J* = 150.9 Hz).

**<sup>13</sup>C NMR (126 MHz, Chloroform-*d*)** δ 154.5 (d, *J* = 3.6 Hz), 138.3, 131.2 (dd, *J* = 273.2, 270.4 Hz), 130.7, 128.5, 128.2, 125.9, 122.5, 97.2 (d, *J* = 3.0 Hz), 71.0 (dd, *J* = 34.6, 18.9 Hz), 41.1 (d, *J* = 3.2 Hz), 21.4.

**HRMS (ESI) m/z:** [M+H]<sup>+</sup> Calcd. for C<sub>13</sub>H<sub>16</sub>F<sub>2</sub>NO<sup>+</sup> 240.1194; Found: 240.1196.

**2,2-difluoro-N,N-dimethyl-5-(p-tolyl)-2,3-dihydrofuran-3-amine (4d)**

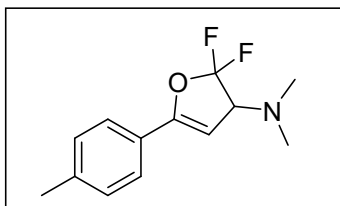

Following the experimental procedures (Condition A) on 0.2 mmol scale, yellow oil, yield: 65% (31.1 mg), column chromatography (silica gel, PE: EA = 15:1, v/v).

**<sup>1</sup>H NMR (500 MHz, Chloroform-*d*)** δ 7.50 (d, *J* = 8.2 Hz, 2H), 7.20 (d, *J* = 8.0 Hz, 2H), 5.48 (t, *J* = 2.4 Hz, 1H), 4.14 (ddd, *J* = 15.1, 7.2, 2.7 Hz, 1H), 2.48 (d, *J* = 1.2 Hz, 6H), 2.38 (s, 3H).

**<sup>19</sup>F NMR (471 MHz, Chloroform-*d*)** δ -61.3 (d, *J* = 150.8 Hz), -83.9 (d, *J* = 150.9 Hz).

**<sup>13</sup>C NMR (126 MHz, Chloroform-*d*)** δ 154.5 (d, *J* = 3.8 Hz), 140.2, 131.2 (dd, *J* = 273.8, 270.9 Hz), 129.3, 125.5, 125.3, 96.4 (d, *J* = 3.0 Hz), 71.1 (dd, *J* = 34.6, 19.0 Hz), 41.1 (d, *J* = 2.8 Hz), 21.4.

**HRMS (ESI) m/z:** [M+H]<sup>+</sup> Calcd. for C<sub>13</sub>H<sub>16</sub>F<sub>2</sub>NO<sup>+</sup> 240.1194; Found: 240.1194.

**2,2-difluoro-5-(4-methoxyphenyl)-N, N-dimethyl-2,3-dihydrofuran-3-amine (4e)**

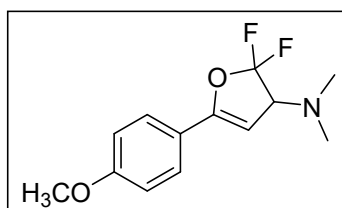

Following the experimental procedures (Condition A) on 0.2 mmol scale, yellow oil, yield: 71% (36.2 mg), column chromatography (silica gel, PE: EA = 10:1, v/v).

**<sup>1</sup>H NMR (500 MHz, Chloroform-*d*)**  $\delta$  7.54 (d, *J* = 8.9 Hz, 2H), 6.91 (d, *J* = 8.9 Hz, 2H), 5.39 (t, *J* = 2.4 Hz, 1H), 4.13 (ddd, *J* = 15.0, 7.1, 2.8 Hz, 1H), 3.83 (s, 3H), 2.48 (d, *J* = 1.1 Hz, 6H).

**<sup>19</sup>F NMR (471 MHz, Chloroform-*d*)**  $\delta$  -61.3 (d, *J* = 150.9 Hz), -84.0 (d, *J* = 151.1 Hz).

**<sup>13</sup>C NMR (126 MHz, Chloroform-*d*)**  $\delta$  160.9, 154.3 (d, *J* = 3.7 Hz), 131.2 (dd, *J* = 273.5, 271.1 Hz), 126.9, 120.9, 114.0, 95.2 (d, *J* = 3.0 Hz), 71.1 (dd, *J* = 34.6, 18.9 Hz), 55.4, 41.1.

**HRMS (ESI) m/z:** [M+H]<sup>+</sup> Calcd. for C<sub>13</sub>H<sub>16</sub>F<sub>2</sub>NO<sub>2</sub><sup>+</sup> 256.1144; Found: 256.1142.

**2,2-difluoro-N, N-dimethyl-5-(4-(trifluoromethoxy) phenyl)-2,3-dihydrofuran-3-amine (4f)**

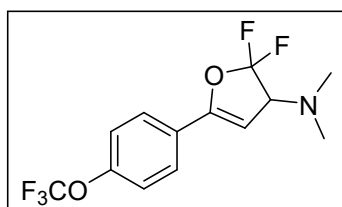

Following the experimental procedures (Condition A) on 0.2 mmol scale, yellow oil, yield: 71% (43.9 mg), column chromatography (silica gel, PE: EA = 10:1, v/v).

**<sup>1</sup>H NMR (500 MHz, Chloroform-*d*)**  $\delta$  7.73 – 7.55 (m, 2H), 7.38 – 7.15 (m, 2H), 5.59 (t, *J* = 2.4 Hz, 1H), 4.19 (ddd, *J* = 15.0, 7.5, 2.8 Hz, 1H), 2.51 (d, *J* = 1.2 Hz, 6H).

**<sup>19</sup>F NMR (471 MHz, Chloroform-*d*)**  $\delta$  -57.8, -61.4 (d, *J* = 150.7 Hz), -83.7 (d, *J* = 150.7 Hz).

**<sup>13</sup>C NMR (126 MHz, Chloroform-*d*)**  $\delta$  153.1, 150.2, 131.1 (dd, *J* = 273.5, 271.1 Hz),  $\delta$  127.00, 126.86, 120.96, 120.38 (q, *J* = 258.1 Hz), 98.19 (d, *J* = 3.1 Hz), 71.07 (dd, *J* = 34.6, 19.0 Hz), 41.09 (d, *J* = 2.3 Hz).

**HRMS (ESI) m/z:** [M+H]<sup>+</sup> Calcd. for C<sub>13</sub>H<sub>13</sub>F<sub>5</sub>NO<sub>2</sub><sup>+</sup> 310.0861; Found: 310.0862.

**2,2-difluoro-N, N-dimethyl-5-(4-(methylthio) phenyl)-2,3-dihydrofuran-3-amine (4g)**

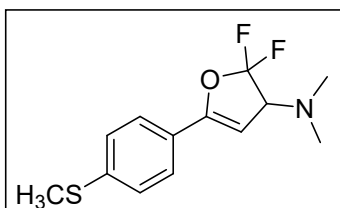

Following the experimental procedures (Condition A) on 0.2 mmol scale, yellow oil, yield: 46% (25.0 mg), column chromatography (silica gel, PE: EA = 10:1, v/v).

**<sup>1</sup>H NMR (500 MHz, Chloroform-*d*)**  $\delta$  7.53 – 7.48 (m, 2H), 7.25 – 7.22 (m, 2H), 5.49 (t,  $J = 2.5$  Hz, 1H), 4.13 (ddd,  $J = 15.0, 7.3, 2.7$  Hz, 1H), 2.50 (s, 3H), 2.48 (d,  $J = 1.2$  Hz, 6H).

**<sup>19</sup>F NMR (471 MHz, Chloroform-*d*)**  $\delta$  -61.4 (d,  $J = 151.2$  Hz), -83.8 (d,  $J = 150.8$  Hz).

**<sup>13</sup>C NMR (126 MHz, Chloroform-*d*)**  $\delta$  154.0 (d,  $J = 3.9$  Hz), 141.3, 131.2 (dd,  $J = 274.1, 271.1$  Hz), 125.9, 125.7, 124.8, 96.7 (d,  $J = 3.1$  Hz), 71.1 (dd,  $J = 34.5, 19.0$  Hz), 41.1 (d,  $J = 3.2$  Hz), 15.3.

**HRMS (ESI) m/z:** [M+H]<sup>+</sup> Calcd. for C<sub>13</sub>H<sub>16</sub>F<sub>2</sub>NOS<sup>+</sup> 272.0915; Found: 272.0917.

**5-([1,1'-biphenyl]-4-yl)-2,2-difluoro-N, N-dimethyl-2,3-dihydrofuran-3-amine (4h)**

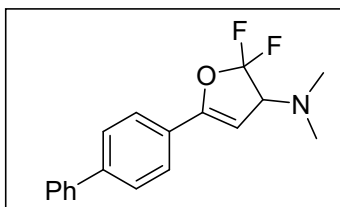

Following the experimental procedures (Condition A) on 0.2 mmol scale, brown solid (mp: 141 – 143 °C), yield: 76% (25.3 mg), column chromatography (silica gel, PE: EA = 15:1, v/v).

**<sup>1</sup>H NMR (500 MHz, Chloroform-*d*)**  $\delta$  7.69 (d,  $J = 8.5$  Hz, 2H), 7.66 – 7.60 (m, 4H), 7.50 – 7.44 (m, 2H), 7.41 – 7.36 (m, 1H), 5.60 (t,  $J = 2.5$  Hz, 1H), 4.19 (ddd,  $J = 15.0, 7.3, 2.7$  Hz, 1H), 2.51 (s, 6H).

**<sup>19</sup>F NMR (471 MHz, Chloroform-*d*)**  $\delta$  -61.3 (d,  $J = 150.8$  Hz), -83.8 (dd,  $J = 150.7, 2.7$  Hz).

**<sup>13</sup>C NMR (126 MHz, Chloroform-*d*)**  $\delta$  154.2 (d,  $J = 3.7$  Hz), 142.7, 140.2, 131.3 (dd,  $J = 274.1, 271.4$  Hz), 128.9, 127.8, 127.3, 127.1, 127.1, 125.8, 97.5 (d,  $J = 3.1$  Hz), 71.1 (dd,  $J = 34.5, 19.0$  Hz), 41.2 (d,  $J = 2.7$  Hz).

**HRMS (ESI) m/z:** [M+H]<sup>+</sup> Calcd. for C<sub>18</sub>H<sub>18</sub>F<sub>2</sub>NO<sup>+</sup> 302.1351; Found: 302.1349.

**2,2-difluoro-N, N-dimethyl-5-(naphthalen-2-yl)-2,3-dihydrofuran-3-amine (4i)**

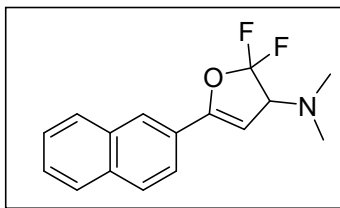

Following the experimental procedures (Condition A) on 0.2 mmol scale, yellow oil, yield: 64% (28.8 mg), column chromatography (silica gel, PE: EA = 15:1, v/v).

**<sup>1</sup>H NMR (500 MHz, Chloroform-*d*)**  $\delta$  8.10 (d,  $J = 1.7$  Hz, 1H), 7.92 – 7.80 (m, 3H), 7.64 (dd,  $J = 8.8$ , 1.8 Hz, 1H), 7.56 – 7.48 (m, 2H), 5.67 (t,  $J = 2.5$  Hz, 1H), 4.21 (ddd,  $J = 15.0$ , 7.4, 2.7 Hz, 1H), 2.52 (s, 6H).

**<sup>19</sup>F NMR (471 MHz, Chloroform-*d*)**  $\delta$  -61.3 (d,  $J = 150.7$  Hz), -83.6 (d,  $J = 150.8$  Hz).

**<sup>13</sup>C NMR (126 MHz, Chloroform-*d*)**  $\delta$  154.4 (d,  $J = 3.5$  Hz), 133.9, 133.0, 131.3 (dd,  $J = 274.1$ , 271.4 Hz), 128.7, 128.4, 127.7, 127.2, 126.8, 125.4, 125.2, 122.4, 98.1 (d,  $J = 3.1$  Hz), 71.2 (dd,  $J = 34.5$ , 19.0 Hz), 41.2 (d,  $J = 2.7$  Hz).

**HRMS (ESI) m/z:** [M+H]<sup>+</sup> Calcd. for C<sub>16</sub>H<sub>16</sub>F<sub>2</sub>NO<sup>+</sup> 276.1194; Found: 276.1194.

**2,2-difluoro-5-(4-fluorophenyl)-N,N-dimethyl-2,3-dihydrofuran-3-amine (4j)**

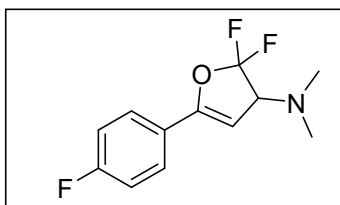

Following the experimental procedures (Condition A) on 0.2 mmol scale, yellow oil, yield: 68% (33.0 mg), column chromatography (silica gel, PE: EA = 15:1, v/v).

**<sup>1</sup>H NMR (500 MHz, Chloroform-*d*)**  $\delta$  7.59 (dd,  $J = 8.9$ , 5.3 Hz, 2H), 7.08 (t,  $J = 8.7$  Hz, 2H), 5.48 (t,  $J = 2.5$  Hz, 1H), 4.14 (ddd,  $J = 15.0$ , 7.4, 2.7 Hz, 1H), 2.48 (d,  $J = 1.2$  Hz, 6H).

**<sup>19</sup>F NMR (471 MHz, Chloroform-*d*)**  $\delta$  -61.4 (d,  $J = 150.7$  Hz), -83.8 (d,  $J = 150.7$  Hz), -110.0.

**<sup>13</sup>C NMR (126 MHz, Chloroform-*d*)**  $\delta$  163.6 (d,  $J = 250.6$  Hz), 153.4 (d,  $J = 4.0$  Hz), 131.2 (dd,  $J = 274.5$ , 271.5 Hz), 127.4 (d,  $J = 8.5$  Hz), 124.5 (d,  $J = 3.2$  Hz), 115.7 (d,  $J = 22.0$  Hz), 97.1 (t,  $J = 2.7$  Hz), 71.1 (dd,  $J = 34.4$ , 18.9 Hz), 41.1 (d,  $J = 2.7$  Hz).

**HRMS (ESI) m/z:** [M+H]<sup>+</sup> Calcd. for C<sub>12</sub>H<sub>13</sub>F<sub>3</sub>NO<sup>+</sup> 244.0944; Found: 244.0942.

**5-(4-chlorophenyl)-2,2-difluoro-N,N-dimethyl-2,3-dihydrofuran-3-amine (4k)**

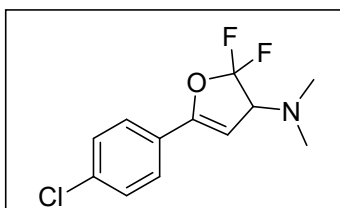

Following the experimental procedures (Condition A) on 0.2 mmol scale, yellow oil, yield: 69% (35.7 mg), column chromatography (silica gel, PE: EA = 15:1, v/v).

**<sup>1</sup>H NMR (500 MHz, Chloroform-*d*)**  $\delta$  7.55 (d, *J* = 8.7 Hz, 2H), 7.39 (d, *J* = 8.6 Hz, 2H), 5.57 (t, *J* = 2.5 Hz, 1H), 4.17 (ddd, *J* = 15.0, 7.5, 2.7 Hz, 1H), 2.50 (d, *J* = 1.3 Hz, 6H).

**<sup>19</sup>F NMR (471 MHz, Chloroform-*d*)**  $\delta$  -61.4 (d, *J* = 150.2 Hz), -83.7 (d, *J* = 150.7 Hz).

**<sup>13</sup>C NMR (126 MHz, Chloroform-*d*)**  $\delta$  153.3 (d, *J* = 3.8 Hz), 135.9, 131.1 (dd, *J* = 274.6, 271.7 Hz), 128.9, 126.7, 126.6, 98.0 (d, *J* = 2.9 Hz), 71.1 (dd, *J* = 34.5, 19.0 Hz), 41.2 (d, *J* = 2.7 Hz).

**HRMS (ESI) m/z:** [M+H]<sup>+</sup> Calcd. for C<sub>12</sub>H<sub>13</sub>ClF<sub>2</sub>NO<sup>+</sup> 260.0648; Found: 260.0650.

**5-(4-bromophenyl)-2,2-difluoro-N,N-dimethyl-2,3-dihydrofuran-3-amine (4l)**

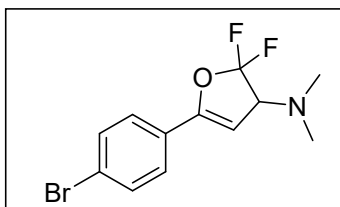

Following the experimental procedures (Condition A) on 0.2 mmol scale, yellow oil, yield: 69% (42.0 mg), column chromatography (silica gel, PE: EA = 15:1, v/v).

**<sup>1</sup>H NMR (500 MHz, Chloroform-*d*)**  $\delta$  7.55 – 7.50 (m, 2H), 7.49 – 7.42 (m, 2H), 5.56 (t, *J* = 2.5 Hz, 1H), 4.13 (ddd, *J* = 15.0, 7.5, 2.7 Hz, 1H), 2.48 (s, 6H).

**<sup>19</sup>F NMR (471 MHz, Chloroform-*d*)**  $\delta$  -61.4 (d, *J* = 150.5 Hz), -83.7 (d, *J* = 150.8 Hz).

**<sup>13</sup>C NMR (126 MHz, Chloroform-*d*)**  $\delta$  153.4 (d, *J* = 3.7 Hz), 131.8, 131.1 (dd, *J* = 274.7, 271.7 Hz), 127.1, 126.9, 124.2, 98.1 (d, *J* = 3.1 Hz), 71.1 (dd, *J* = 34.4, 19.0 Hz), 41.2 (d, *J* = 2.7 Hz).

**HRMS (ESI) m/z:** [M+H]<sup>+</sup> Calcd. for C<sub>12</sub>H<sub>13</sub>BrF<sub>2</sub>NO<sup>+</sup> 304.0143; Found: 304.0144.

**2,2-difluoro-5-(4-iodophenyl)-N,N-dimethyl-2,3-dihydrofuran-3-amine (4m)**

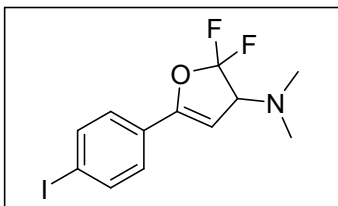

Following the experimental procedures (Condition A) on 0.2 mmol scale, yellow oil, yield: 58% (40.7mg), column chromatography (silica gel, PE: EA = 15:1, v/v).

**<sup>1</sup>H NMR (500 MHz, Chloroform-*d*)**  $\delta$  7.77 – 7.65 (m, 2H), 7.32 (d,  $J$  = 8.5 Hz, 2H), 5.57 (t,  $J$  = 2.4 Hz, 1H), 4.13 (ddd,  $J$  = 15.0, 7.5, 2.7 Hz, 1H), 2.47 (d,  $J$  = 1.2 Hz, 6H).

**<sup>19</sup>F NMR (471 MHz, Chloroform-*d*)**  $\delta$  -61.4 (dd,  $J$  = 150.5, 5.4 Hz), -83.7 (dd,  $J$  = 150.2, 3.3 Hz).

**<sup>13</sup>C NMR (126 MHz, Chloroform-*d*)**  $\delta$  153.5 (d,  $J$  = 3.8 Hz), 137.8, 131.1 (dd,  $J$  = 274.7, 271.6 Hz), 127.7, 126.9, 98.3 (d,  $J$  = 3.1 Hz), 96.0, 71.1 (dd,  $J$  = 34.5, 19.0 Hz), 41.2 (d,  $J$  = 3.1 Hz).

**HRMS (ESI) m/z:** [M+H]<sup>+</sup> Calcd. for C<sub>12</sub>H<sub>13</sub>F<sub>2</sub>INO<sup>+</sup> 352.0004; Found: 352.0009.

**methyl 4-(4-(dimethylamino)-5,5-difluoro-4,5-dihydrofuran-2-yl) benzoate (4n)**

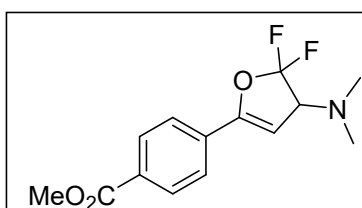

Following the experimental procedures (Condition A) on 0.2 mmol scale, yellow oil, yield: 53% (30.0 mg), column chromatography (silica gel, PE: EA = 10:1, v/v).

**<sup>1</sup>H NMR (500 MHz, Chloroform-*d*)** <sup>1</sup>H NMR (500 MHz, Chloroform-*d*)  $\delta$  8.09 – 8.01 (m, 2H), 7.70 – 7.62 (m, 2H), 5.69 (t,  $J$  = 2.4 Hz, 1H), 4.21 – 4.13 (m, 1H), 3.92 (s, 3H), 2.48 (d,  $J$  = 1.2 Hz, 6H).

**<sup>19</sup>F NMR (471 MHz, Chloroform-*d*)**  $\delta$  -61.4 (d,  $J$  = 150.9 Hz), -83.5 (d,  $J$  = 150.4 Hz).

**<sup>13</sup>C NMR (126 MHz, Chloroform-*d*)**  $\delta$  166.4, 153.4 (d,  $J$  = 3.7 Hz), 132.2, 131.2, 131.1 (dd,  $J$  = 275.0, 271.6 Hz), 129.8, 125.3, 100.0 (d,  $J$  = 3.1 Hz), 71.1 (dd,  $J$  = 34.4, 19.0 Hz), 52.28, 41.2 (d,  $J$  = 2.7 Hz).

**HRMS (ESI) m/z:** [M+H]<sup>+</sup> Calcd. for C<sub>14</sub>H<sub>16</sub>F<sub>2</sub>NO<sub>3</sub><sup>+</sup> 284.1093; Found: 284.1097.

**2,2-difluoro-N, N-dimethyl-5-(4-(trifluoromethyl) phenyl)-2,3-dihydrofuran-3-amine (4o)**

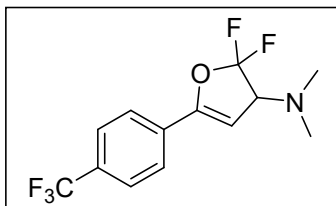

Following the experimental procedures (Condition A) on 0.2 mmol scale, yellow oil, yield: 69% (40.4 mg), column chromatography (silica gel, PE: EA = 15:1, v/v).

**<sup>1</sup>H NMR (500 MHz, Chloroform-*d*)**  $\delta$  7.89 – 7.51 (m, 4H), 5.69 (t,  $J = 2.5$  Hz, 1H), 4.18 (ddd,  $J = 14.9, 7.6, 2.8$  Hz, 1H), 2.49 (s, 6H).

**<sup>19</sup>F NMR (471 MHz, Chloroform-*d*)**  $\delta$  -61.5 (d,  $J = 150.2$  Hz), -62.9, -83.6 (d,  $J = 150.6$  Hz).

**<sup>13</sup>C NMR (126 MHz, Chloroform-*d*)**  $\delta$  153.0 (d,  $J = 3.9$  Hz), 131.7 (q,  $J = 32.9$  Hz), 131.5, 131.1 (dd,  $J = 275.2, 272.1$  Hz), 125.6, 125.6 (d,  $J = 3.7$  Hz), 123.8 (q,  $J = 272.2$  Hz), 99.9 (d,  $J = 3.2$  Hz), 71.1 (dd,  $J = 34.3, 19.1$  Hz), 41.2 (d,  $J = 2.7$  Hz).

**HRMS (ESI) m/z:** [M+H]<sup>+</sup> Calcd. for C<sub>13</sub>H<sub>13</sub>F<sub>5</sub>NO<sup>+</sup> 294.0912; Found: 294.0916.

#### 2,2-difluoro-N,N-dimethyl-5-(4-(methylsulfonyl) phenyl)-2,3-dihydrofuran-3-amine (4p)

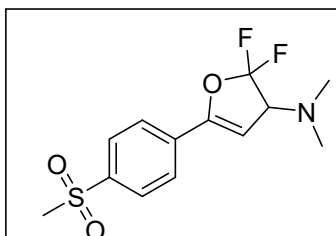

Following the experimental procedures (Condition A) on 0.2 mmol scale, yellow oil, yield: 42% (25.5mg), column chromatography (silica gel, PE: EA = 15:1, v/v).

**<sup>1</sup>H NMR (500 MHz, Chloroform-*d*)**  $\delta$  7.99 – 7.95 (m, 2H), 7.81 – 7.76 (m, 2H), 5.77 (t,  $J = 2.4$  Hz, 1H), 4.19 (ddd,  $J = 14.9, 7.7, 2.7$  Hz, 1H), 3.06 (d,  $J = 0.7$  Hz, 3H), 2.48 (d,  $J = 1.3$  Hz, 6H).

**<sup>19</sup>F NMR (471 MHz, Chloroform-*d*)**  $\delta$  -61.53 (d,  $J = 150.1$  Hz), -83.40 (d,  $J = 150.0$  Hz).

**<sup>13</sup>C NMR (126 MHz, Chloroform-*d*)**  $\delta$  152.4 (d,  $J = 3.7$  Hz), 141.4, 133.2, 130.0 (dd,  $J = 275.0, 271.6$  Hz), 127.8, 126.2, 101.4 (d,  $J = 3.0$  Hz), 71.1 (dd,  $J = 34.4, 19.1$  Hz), 44.5, 41.3 (d,  $J = 2.9$  Hz).

**HRMS (ESI) m/z:** [M+H]<sup>+</sup> Calcd. for C<sub>13</sub>H<sub>16</sub>F<sub>2</sub>NO<sub>3</sub>S<sup>+</sup> 304.0813; Found: 304.0817.

#### 4-(4-(dimethylamino)-5,5-difluoro-4,5-dihydrofuran-2-yl) benzonitrile (4q)

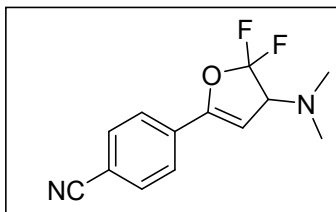

Following the experimental procedures (Condition A) on 0.2 mmol scale, yellow oil, yield: 78% (39.0 mg), column chromatography (silica gel, PE: EA = 10:1, v/v).

**<sup>1</sup>H NMR (500 MHz, Chloroform-*d*)** <sup>1</sup>H NMR (500 MHz, Chloroform-*d*) δ 7.68 (s, 4H), 5.73 (t, *J* = 2.4 Hz, 1H), 4.18 (ddd, *J* = 14.9, 7.7, 2.8 Hz, 1H), 2.47 (d, *J* = 1.1 Hz, 6H).

**<sup>19</sup>F NMR (471 MHz, Chloroform-*d*)** δ -61.49 (d, *J* = 150.1 Hz), -83.38 (d, *J* = 150.3 Hz).

**<sup>13</sup>C NMR (126 MHz, Chloroform-*d*)** δ 152.4 (d, *J* = 3.9 Hz), 132.4, 132.2, 131.0 (dd, *J* = 275.6, 272.4 Hz), 125.9, 118.3, 113.3, 101.3 (d, *J* = 3.4 Hz), 71.1 (dd, *J* = 34.4, 19.1 Hz), 41.2 (d, *J* = 2.7 Hz).

**HRMS (ESI) m/z:** [M+H]<sup>+</sup> Calcd. for C<sub>13</sub>H<sub>13</sub>F<sub>2</sub>N<sub>2</sub>O<sup>+</sup> 251.0990; Found: 251.0991.

#### 2,2-difluoro-N,N-dimethyl-5-(4-nitrophenyl)-2,3-dihydrofuran-3-amine (4r)

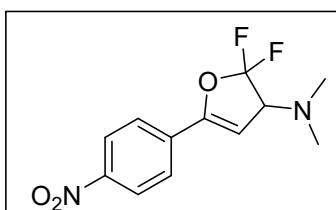

Following the experimental procedures (Condition A) on 0.2 mmol scale, yellow solid (mp: 68 – 70 °C), yield: 71% (38.3 mg), column chromatography (silica gel, PE: EA = 8:1, v/v).

**<sup>1</sup>H NMR (500 MHz, Chloroform-*d*)** δ 8.29 – 8.21 (m, 2H), 7.78 – 7.72 (m, 2H), 5.80 (t, *J* = 2.5 Hz, 1H), 4.20 (ddd, *J* = 15.0, 7.8, 2.8 Hz, 1H), 2.49 (d, *J* = 1.3 Hz, 6H).

**<sup>19</sup>F NMR (471 MHz, Chloroform-*d*)** δ -61.5 (d, *J* = 150.2 Hz), -83.3 (d, *J* = 150.1 Hz).

**<sup>13</sup>C NMR (126 MHz, Chloroform-*d*)** δ 152.2 (d, *J* = 3.7 Hz), 148.4, 133.9, 131.0 (dd, *J* = 275.8, 272.4 Hz), 126.2, 124.0, 102.1 (d, *J* = 3.2 Hz), 71.1 (dd, *J* = 34.3, 19.2 Hz), 41.3 (d, *J* = 2.7 Hz).

**HRMS (ESI) m/z:** [M+H]<sup>+</sup> Calcd. for C<sub>12</sub>H<sub>13</sub>F<sub>2</sub>N<sub>2</sub>O<sub>3</sub><sup>+</sup> 271.0889; Found: 271.0892.

#### 2,2-difluoro-N,N-dimethyl-5-(3-nitrophenyl)-2,3-dihydrofuran-3-amine (4s)



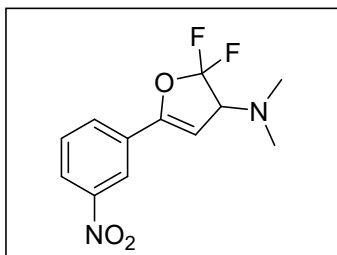

Following the experimental procedures (Condition A) on 0.2 mmol scale, yellow oil, yield: 46% (24.8 mg), column chromatography (silica gel, PE: EA = 8:1, v/v).

**<sup>1</sup>H NMR (500 MHz, Chloroform-*d*)**  $\delta$  8.44 (t,  $J$  = 2.0 Hz, 1H), 8.24 (ddd,  $J$  = 8.2, 2.3, 1.1 Hz, 1H), 7.91 (dt,  $J$  = 7.8, 1.4 Hz, 1H), 7.60 (t,  $J$  = 8.0 Hz, 1H), 5.75 (t,  $J$  = 2.4 Hz, 1H), 4.20 (ddd,  $J$  = 15.0, 7.7, 2.7 Hz, 1H), 2.49 (d,  $J$  = 1.3 Hz, 6H).

**<sup>19</sup>F NMR (471 MHz, Chloroform-*d*)**  $\delta$  -61.6 (d,  $J$  = 150.1 Hz), -83.5 (d,  $J$  = 150.0 Hz).

**<sup>13</sup>C NMR (126 MHz, Chloroform-*d*)**  $\delta$  151.9 (d,  $J$  = 3.8 Hz), 148.5, 131.0 (dd,  $J$  = 275.7, 272.5 Hz), 130.9, 129.9, 129.8, 124.4, 120.4, 100.4 (d,  $J$  = 3.2 Hz), 71.1 (dd,  $J$  = 34.4, 19.1 Hz), 41.3 (d,  $J$  = 2.7 Hz).

**HRMS (ESI) m/z:** [M+H]<sup>+</sup> Calcd. for C<sub>12</sub>H<sub>13</sub>F<sub>2</sub>N<sub>2</sub>O<sub>3</sub><sup>+</sup> 271.0889; Found: 271.0888.

**(E)-2,2-difluoro-N,N-dimethyl-5-styryl-2,3-dihydrofuran-3-amine (4t)**

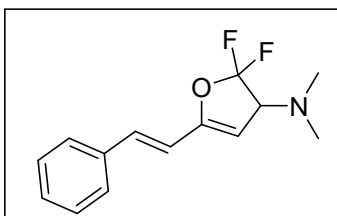

Following the experimental procedures (Condition A) on 0.2 mmol scale, yellow oil, yield: 68% (34.1 mg), column chromatography (silica gel, PE: EA = 15:1, v/v).

**<sup>1</sup>H NMR (500 MHz, Chloroform-*d*)**  $\delta$  7.45 (dd,  $J$  = 7.3, 1.8 Hz, 2H), 7.35 (dd,  $J$  = 8.3, 6.6 Hz, 2H), 7.32 – 7.28 (m, 1H), 7.01 (d,  $J$  = 16.1 Hz, 1H), 6.55 (d,  $J$  = 16.1 Hz, 1H), 5.21 (t,  $J$  = 2.6 Hz, 1H), 4.09 (ddd,  $J$  = 14.6, 7.2, 2.8 Hz, 1H), 2.47 (d,  $J$  = 1.1 Hz, 6H).

**<sup>19</sup>F NMR (471 MHz, Chloroform-*d*)**  $\delta$  -61.5 (d,  $J$  = 150.0 Hz), -83.5 (d,  $J$  = 150.0 Hz).

**<sup>13</sup>C NMR (126 MHz, Chloroform-*d*)**  $\delta$  153.6 (d,  $J$  = 3.8 Hz), 135.7, 133.7, 131.2 (dd,  $J$  = 274.3, 271.3 Hz), 128.8, 128.8, 127.0, 114.8, 101.9 (d,  $J$  = 3.1 Hz), 70.9 (dd,  $J$  = 34.3, 19.1 Hz), 41.2 (d,  $J$  = 2.8 Hz).

**HRMS (ESI) m/z:** [M+H]<sup>+</sup> Calcd. for C<sub>14</sub>H<sub>16</sub>F<sub>2</sub>NO<sup>+</sup> 252.1194; Found: 252.1191.

**2,2-difluoro-N,N-dimethyl-5-(thiophen-2-yl)-2,3-dihydrofuran-3-amine (4u)**

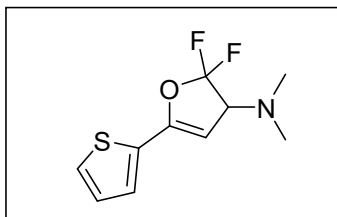

Following the experimental procedures (Condition A) on 0.2 mmol scale, yellow oil, yield: 58% (26.8 mg), column chromatography (silica gel, PE: EA = 15:1, v/v).

**<sup>1</sup>H NMR (500 MHz, Chloroform-*d*)**  $\delta$  7.43 – 7.30 (m, 2H), 7.05 (dd,  $J$  = 5.0, 3.7 Hz, 1H), 5.38 (t,  $J$  = 2.5 Hz, 1H), 4.14 (ddd,  $J$  = 15.0, 7.1, 2.7 Hz, 1H), 2.48 (s, 6H).

**<sup>19</sup>F NMR (471 MHz, Chloroform-*d*)**  $\delta$  -61.62 (d,  $J$  = 150.0 Hz), -83.81 (d,  $J$  = 150.0 Hz).

**<sup>13</sup>C NMR (126 MHz, Chloroform-*d*)**  $\delta$  149.6 (d,  $J$  = 4.5 Hz), 131.0 (dd,  $J$  = 274.6, 272.2 Hz), 130.9, 127.7, 127.3, 126.7, 96.5 (d,  $J$  = 2.7 Hz), 71.1 (dd,  $J$  = 34.4, 18.8 Hz), 41.1 (d,  $J$  = 2.7 Hz).

**HRMS (ESI) m/z:** [M+H]<sup>+</sup> Calcd. for C<sub>10</sub>H<sub>12</sub>F<sub>2</sub>NOS<sup>+</sup> 232.0602; Found: 232.0603.

**1,4-bis(2,2-difluoro-5-phenyl-2,3-dihydrofuran-3-yl) piperazine (4v)**

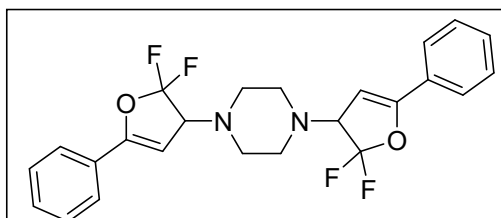

Following the experimental procedures (Condition A) on 0.2 mmol scale, brown solid (mp: 164 – 166 °C), yield: 72% (64.2 mg), column chromatography (silica gel, PE: EA = 15:1, v/v).

**<sup>1</sup>H NMR (500 MHz, Chloroform-*d*)**  $\delta$  7.62 (dtd,  $J$  = 5.8, 3.5, 1.5 Hz, 4H), 7.46 – 7.36 (m, 6H), 5.60 (t,  $J$  = 2.4 Hz, 2H), 4.20 (ddd,  $J$  = 15.4, 7.1, 2.7 Hz, 2H), 2.91 (dq,  $J$  = 9.9, 4.9, 4.2 Hz, 4H), 2.84 – 2.76 (m, 4H).

**<sup>19</sup>F NMR (471 MHz, Chloroform-*d*)**  $\delta$  -61.6 (d,  $J$  = 27.9 Hz), -62.0 (d,  $J$  = 28.6 Hz), -82.7 (d,  $J$  = 389.7 Hz), -83.8 (d,  $J$  = 319.7 Hz).

**<sup>13</sup>C NMR (126 MHz, Chloroform-*d*)**  $\delta$  154.6 (d,  $J$  = 3.6 Hz), 130.8 (dd,  $J$  = 274.6, 272.2 Hz), 130.0, 128.6, 128.1, 125.4, 96.6 (d,  $J$  = 3.1 Hz), 70.9 (dd,  $J$  = 35.5, 18.9 Hz), 49.4.

**HRMS (ESI) m/z:** [M+H]<sup>+</sup> Calcd. for C<sub>24</sub>H<sub>23</sub>F<sub>4</sub>N<sub>2</sub>O<sub>2</sub><sup>+</sup> 447.1690; Found: 447.1689.

**1-(2,2-difluoro-5-phenyl-2,3-dihydrofuran-3-yl) pyrrolidine (5a)**

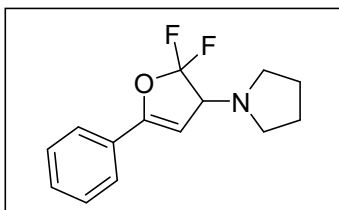

Following the experimental procedures (Condition B) on 0.2 mmol scale, yellow oil, yield: 62% (31.1 mg), column chromatography (silica gel, PE: EA = 15:1, v/v).

**<sup>1</sup>H NMR (500 MHz, Chloroform-*d*)**  $\delta$  7.63 – 7.57 (m, 2H), 7.44 – 7.35 (m, 3H), 5.61 (t,  $J$  = 2.3 Hz, 1H), 4.24 (m,  $J$  = 15.6, 7.1, 2.6 Hz, 1H), 2.91 – 2.83 (m, 2H), 2.81 – 2.71 (m, 2H), 1.87 – 1.79 (m, 4H).

**<sup>19</sup>F NMR (471 MHz, Chloroform-*d*)**  $\delta$  -63.5 (d,  $J$  = 150.0 Hz), -82.8 (dd,  $J$  = 149.6, 2.9 Hz).

**<sup>13</sup>C NMR (126 MHz, Chloroform-*d*)**  $\delta$  154.1 (d,  $J$  = 3.3 Hz), 130.8 (dd,  $J$  = 274.6, 272.2 Hz), 129.8, 128.5 (d,  $J$  = 24.6 Hz), 125.3, 97.6 (d,  $J$  = 2.8 Hz), 68.5 (dd,  $J$  = 34.9, 19.3 Hz), 50.3 (d,  $J$  = 2.3 Hz), 24.1.

**HRMS (ESI)  $m/z$ :** [M+H]<sup>+</sup> Calcd. for C<sub>14</sub>H<sub>16</sub>F<sub>2</sub>NO<sup>+</sup> 252.1194; Found: 252.1193.

**1-(2,2-difluoro-5-phenyl-2,3-dihydrofuran-3-yl) piperidine (5b)**

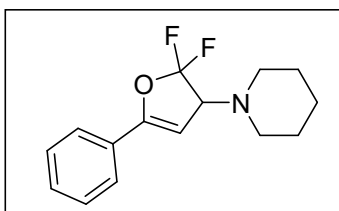

Following the experimental procedures (Condition A) on 0.2 mmol scale, yellow oil, yield: 95% (50.5 mg), column chromatography (silica gel, PE: EA = 15:1, v/v).

**<sup>1</sup>H NMR (500 MHz, Chloroform-*d*)**  $\delta$  7.68 – 7.50 (m, 2H), 7.44 – 7.35 (m, 3H), 5.58 (t,  $J$  = 2.4 Hz, 1H), 4.15 (m,  $J$  = 15.5, 7.5, 2.7 Hz, 1H), 2.81 (m,  $J$  = 10.9, 4.9 Hz, 2H), 2.68 (m,  $J$  = 11.0, 5.0 Hz, 2H), 1.58 (m,  $J$  = 6.7, 5.0, 2.9 Hz, 4H), 1.48 (p,  $J$  = 5.7 Hz, 2H).

**<sup>19</sup>F NMR (471 MHz, Chloroform-*d*)**  $\delta$  -61.2 (d,  $J$  = 150.3 Hz), -83.1 (d,  $J$  = 150.0 Hz).

**<sup>13</sup>C NMR (126 MHz, Chloroform-*d*)**  $\delta$  154.1 (d,  $J$  = 3.8 Hz), 131.1 (dd,  $J$  = 274.5, 270.7 Hz), 129.8, 128.6, 128.4, 125.3, 97.4 (d,  $J$  = 3.2 Hz), 71.6 (dd,  $J$  = 34.7, 18.9 Hz), 50.3, 26.4, 24.4.

**HRMS (ESI)  $m/z$ :** [M+H]<sup>+</sup> Calcd. for C<sub>15</sub>H<sub>18</sub>F<sub>2</sub>NO<sup>+</sup> 266.1351; Found: 266.1351.

**4-(2,2-difluoro-5-phenyl-2,3-dihydrofuran-3-yl) morpholine (5c)**

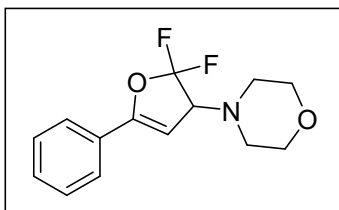

Following the experimental procedures (Condition A) on 0.2 mmol scale, yellow oil, yield: 92% (49.1mg), column chromatography (silica gel, PE: EA = 15:1, v/v).

**<sup>1</sup>H NMR (500 MHz, Chloroform-*d*)**  $\delta$  7.60 (m,  $J = 6.7, 3.1$  Hz, 2H), 7.42 – 7.37 (m, 3H), 5.56 (t,  $J = 2.4$  Hz, 1H), 4.13 (m,  $J = 15.2, 7.0, 2.7$  Hz, 1H), 3.71 (t,  $J = 4.7$  Hz, 4H), 2.85 (m,  $J = 10.0, 4.7$  Hz, 2H), 2.74 (m,  $J = 10.9, 4.8$  Hz, 2H).

**<sup>19</sup>F NMR (471 MHz, Chloroform-*d*)** -61.8 (d,  $J = 150.6$  Hz), -83.4 (d,  $J = 150.7$  Hz).

**<sup>13</sup>C NMR (126 MHz, Chloroform-*d*)**  $\delta$  154.8 (d,  $J = 3.7$  Hz), 130.8 (dd,  $J = 274.5, 270.7$  Hz), 130.1, 128.6, 128.1, 125.4, 96.2 (d,  $J = 2.9$  Hz), 71.1 (dd,  $J = 35.4, 18.9$  Hz), 67.3, 49.6 (d,  $J = 2.7$  Hz).

**HRMS (ESI) m/z:** [M+H]<sup>+</sup> Calcd. for C<sub>14</sub>H<sub>16</sub>F<sub>2</sub>NO<sub>2</sub><sup>+</sup> 268.1144; Found: 268.1142.

**8-(2,2-difluoro-5-phenyl-2,3-dihydrofuran-3-yl)-1,4-dioxo-8-azaspiro [4.5] decane (5d)**

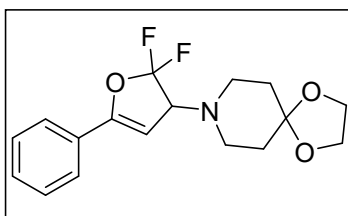

Following the experimental procedures (Condition A) on 0.2 mmol scale, brown solid (mp: 136 – 138 °C), yield: 93% (60.2 mg), column chromatography (silica gel, PE: EA = 10:1, v/v).

**<sup>1</sup>H NMR (500 MHz, Chloroform-*d*)**  $\delta$  7.61 – 7.55 (m, 2H), 7.42 – 7.35 (m, 3H), 5.58 (t,  $J = 2.4$  Hz, 1H), 4.19 (m,  $J = 15.7, 7.1, 2.7$  Hz, 1H), 3.94 (s, 4H), 2.90 (m,  $J = 11.5, 6.0$  Hz, 2H), 2.83 – 2.75 (m, 2H), 1.74 (t,  $J = 5.8$  Hz, 4H).

**<sup>19</sup>F NMR (471 MHz, Chloroform-*d*)**  $\delta$  -61.9 (d,  $J = 150.1$  Hz), -83.7 (d,  $J = 150.9$  Hz).

**<sup>13</sup>C NMR (126 MHz, Chloroform-*d*)**  $\delta$  154.4 (d,  $J = 3.6$  Hz), 130.8 (dd,  $J = 273.6, 270.0$  Hz), 129.9, 128.6, 128.3, 125.3, 107.1, 97.1 (d,  $J = 2.8$  Hz), 70.9 (dd,  $J = 35.5, 19.3$  Hz), 64.3, 47.3, 35.4.

**HRMS (ESI) m/z:** [M+H]<sup>+</sup> Calcd. for C<sub>17</sub>H<sub>20</sub>F<sub>2</sub>NO<sub>3</sub><sup>+</sup> 324.1406; Found: 324.1410.

**N-cyclohexyl-2,2-difluoro-N-methyl-5-phenyl-2,3-dihydrofuran-3-amine (5e)**

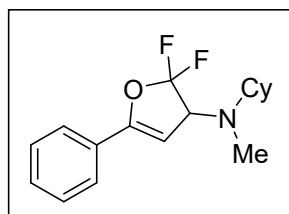

Following the experimental procedures (Condition A) on 0.2 mmol scale, yellow oil, yield: 91% (53.5 mg), column chromatography (silica gel, PE: EA = 15:1, v/v).

**<sup>1</sup>H NMR (500 MHz, Chloroform-*d*)**  $\delta$  7.68 – 7.51 (m, 2H), 7.46 – 7.32 (m, 3H), 5.53 (t, *J* = 2.3 Hz, 1H), 4.43 (m, *J* = 16.3, 7.6, 2.7 Hz, 1H), 2.61 (tt, *J* = 10.8, 3.6 Hz, 1H), 2.37 (d, *J* = 1.2 Hz, 3H), 1.93 (m, *J* = 11.8, 5.9, 2.8 Hz, 2H), 1.86 – 1.75 (m, 2H), 1.65 (m, *J* = 12.7, 3.3, 1.7 Hz, 1H), 1.36 – 1.24 (m, 4H), 1.13 (tt, *J* = 12.5, 3.6 Hz, 1H).

**<sup>19</sup>F NMR (471 MHz, Chloroform-*d*)**  $\delta$  -61.9 (d, *J* = 150.1 Hz), -83.7 (d, *J* = 150.9 Hz).

**<sup>13</sup>C NMR (126 MHz, Chloroform-*d*)**  $\delta$  153.3 (d, *J* = 3.6 Hz), 131.0 (dd, *J* = 272.0, 269.3 Hz), 129.7, 128.6, 128.5, 125.2, 99.4 (d, *J* = 3.6 Hz), 67.1 (dd, *J* = 35.5, 19.7 Hz), 62.3, 33.4 (d, *J* = 3.2 Hz), 30.9, 30.5, 26.1, 26.0, 25.9.

**HRMS (ESI) m/z:** [M+H]<sup>+</sup> Calcd. for C<sub>17</sub>H<sub>22</sub>F<sub>2</sub>NO<sup>+</sup> 294.1664; Found: 294.1662.

**N-(2,2-dimethoxyethyl)-2,2-difluoro-N-methyl-5-phenyl-2,3-dihydrofuran-3-amine (5f)**

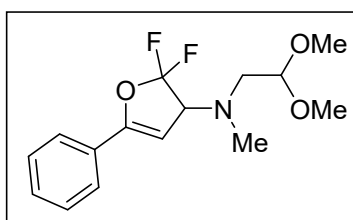

Following the experimental procedures (Condition A) on 0.2 mmol scale, yellow oil, yield: 66% (39.6 mg), column chromatography (silica gel, PE: EA = 15:1, v/v).

**<sup>1</sup>H NMR (500 MHz, Chloroform-*d*)**  $\delta$  7.61 – 7.56 (m, 2H), 7.42 – 7.36 (m, 3H), 5.54 (t, *J* = 2.4 Hz, 1H), 4.43 (t, *J* = 5.2 Hz, 1H), 4.33 (m, *J* = 14.4, 8.0, 2.8 Hz, 1H), 3.37 (d, *J* = 4.5 Hz, 6H), 2.82 (m, *J* = 51.7, 14.0, 5.1, 1.5 Hz, 2H), 2.58 (s, 3H).

**<sup>19</sup>F NMR (471 MHz, Chloroform-*d*)**  $\delta$  -61.8 (d, *J* = 150.9 Hz), -81.5 (d, *J* = 150.7 Hz).

**<sup>13</sup>C NMR (126 MHz, Chloroform-*d*)**  $\delta$  154.3 (d, *J* = 3.6 Hz), 131.3 (t, *J* = 273.4 Hz), 129.9, 128.6,

128.2, 125.3, 103.8, 98.3 (d,  $J = 3.5$  Hz), 71.4 (dd,  $J = 34.0, 19.6$  Hz), 54.4, 53.9, 53.7, 39.7.

**HRMS (ESI) m/z:**  $[M+H]^+$  Calcd. for  $C_{15}H_{20}F_2NO_3^+$  300.1406; Found: 300.1402.

**N, N-diethyl-2,2-difluoro-5-phenyl-2,3-dihydrofuran-3-amine (5g)**

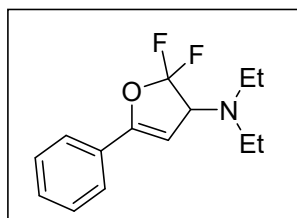

Following the experimental procedures (Condition A) on 0.2 mmol scale, yellow oil, yield: 93% (47.2 mg), column chromatography (silica gel, PE: EA = 15:1, v/v).

**$^1H$  NMR (500 MHz, Chloroform-*d*)**  $\delta$  7.65 – 7.60 (m, 2H), 7.42 (m,  $J = 4.7, 3.6, 1.6$  Hz, 3H), 5.58 (t,  $J = 2.4$  Hz, 1H), 4.42 (m,  $J = 15.5, 8.2, 2.7$  Hz, 1H), 2.84 – 2.70 (m, 4H), 1.12 (t,  $J = 7.2$  Hz, 6H).

**$^{19}F$  NMR (471 MHz, Chloroform-*d*)**  $\delta$  -62.5 (d,  $J = 150.3$  Hz), -80.5 (d,  $J = 150.3$  Hz).

**$^{13}C$  NMR (126 MHz, Chloroform-*d*)**  $\delta$  153.8 (d,  $J = 3.6$  Hz), 131.3 (dd,  $J = 273.6, 270.9$  Hz), 129.8, 128.6, 128.5, 125.3, 98.8 (d,  $J = 3.6$  Hz), 68.4 (dd,  $J = 34.2, 19.6$  Hz), 44.7, 14.4.

**HRMS (ESI) m/z:**  $[M+H]^+$  Calcd. for  $C_{14}H_{18}F_2NO^+$  254.1351; Found: 254.1351.

**N-allyl-2,2-difluoro-N-methyl-5-phenyl-2,3-dihydrofuran-3-amine (5h)**

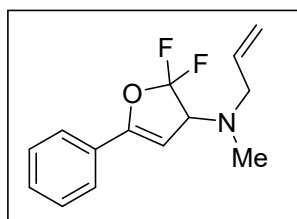

Following the experimental procedures (Condition A) on 0.2 mmol scale, yellow oil, yield: 92% (46.4 mg), column chromatography (silica gel, PE: EA = 15:1, v/v).

**$^1H$  NMR (500 MHz, Chloroform-*d*)**  $\delta$  7.64 – 7.57 (m, 2H), 7.40 (m,  $J = 5.0, 2.0$  Hz, 3H), 5.89 – 5.75 (m, 1H), 5.55 (t,  $J = 2.4$  Hz, 1H), 5.30 – 5.10 (m, 2H), 4.32 (m,  $J = 15.0, 7.7, 2.7$  Hz, 1H), 3.39 – 3.20 (m, 2H), 2.44 (d,  $J = 1.2$  Hz, 3H).

**$^{19}F$  NMR (471 MHz, Chloroform-*d*)**  $\delta$  -61.9 (d,  $J = 150.8$  Hz), -82.3 (d,  $J = 150.9$  Hz).

**$^{13}C$  NMR (126 MHz, Chloroform-*d*)**  $\delta$  154.3 (d,  $J = 3.6$  Hz), 135.8, 131.3 (dd,  $J = 273.9, 271.7$  Hz), 129.9, 128.6, 128.3, 125.3, 117.6, 97.9 (d,  $J = 3.2$  Hz), 69.8 (dd,  $J = 34.7, 19.3$  Hz), 56.7, 37.6 (d,  $J =$

3.0 Hz).

**HRMS (ESI) m/z:** [M+H]<sup>+</sup> Calcd. for C<sub>14</sub>H<sub>16</sub>F<sub>2</sub>NO<sup>+</sup> 252.1194; Found: 252.1120.

**N, N-diallyl-2,2-difluoro-5-phenyl-2,3-dihydrofuran-3-amine (5i)**

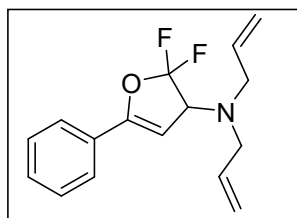

Following the experimental procedures (Condition A) on 0.2 mmol scale, yellow oil, yield: 95% (52.8 mg), column chromatography (silica gel, PE: EA = 15:1, v/v).

**<sup>1</sup>H NMR (500 MHz, Chloroform-*d*)** δ 7.67 – 7.58 (m, 2H), 7.43 (m, *J* = 4.8, 4.3, 2.1 Hz, 3H), 5.92 – 5.78 (m, 2H), 5.56 (q, *J* = 2.1 Hz, 1H), 5.27 (m, *J* = 17.1, 1.8 Hz, 2H), 5.19 (m, *J* = 10.1, 1.6 Hz, 2H), 4.57 – 4.45 (m, 1H), 3.39 (m, *J* = 14.6, 5.5, 1.7 Hz, 2H), 3.30 (m, *J* = 14.7, 7.0 Hz, 2H).

**<sup>19</sup>F NMR (471 MHz, Chloroform-*d*)** δ -62.9 (d, *J* = 150.9 Hz), -80.5 (dd, *J* = 151.4, 1.9 Hz).

**<sup>13</sup>C NMR (126 MHz, Chloroform-*d*)** δ 154.1 (d, *J* = 3.6 Hz), 136.3, 131.3 (t, *J* = 272.1 Hz), 129.9, 128.6, 128.3, 125.3, 117.3, 98.4 (d, *J* = 3.6 Hz), 67.1 (dd, *J* = 34.8, 19.4 Hz), 53.3 (d, *J* = 2.7 Hz).

**HRMS (ESI) m/z:** [M+H]<sup>+</sup> Calcd. for C<sub>16</sub>H<sub>18</sub>F<sub>2</sub>NO<sup>+</sup> 278.1351; Found: 278.1353.

**N-butyl-2,2-difluoro-N,5-diphenyl-2,3-dihydrofuran-3-amine (5j)**

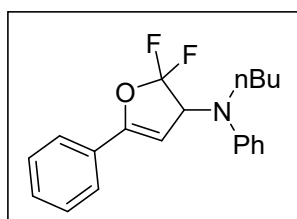

Following the experimental procedures (Condition A) on 0.2 mmol scale, yellow oil, yield: 96% (63.3 mg), column chromatography (silica gel, PE: EA = 15:1, v/v).

**<sup>1</sup>H NMR (500 MHz, Chloroform-*d*)** δ 7.72 (m, *J* = 6.2, 3.9, 1.8 Hz, 2H), 7.55 – 7.46 (m, 3H), 7.35 (m, *J* = 9.0, 7.2, 2.0 Hz, 2H), 7.00 – 6.93 (m, 2H), 6.89 (m, *J* = 7.3, 1.8 Hz, 1H), 5.69 (t, *J* = 2.4 Hz, 1H), 5.31 (m, *J* = 12.8, 6.3, 2.8 Hz, 1H), 3.32 (m, *J* = 9.1, 5.9, 1.8 Hz, 2H), 1.78 – 1.66 (m, 1H), 1.64 – 1.55 (m, 1H), 1.51 (d, *J* = 2.1 Hz, 1H), 1.36 (m, *J* = 15.2, 7.6, 1.9 Hz, 3H), 0.97 (m, *J* = 7.4, 1.9 Hz, 3H).

**<sup>19</sup>F NMR (471 MHz, Chloroform-*d*)** δ -65.8 (d, *J* = 148.2 Hz), -80.8 (d, *J* = 148.6 Hz).

$^{13}\text{C}$  NMR (126 MHz, Chloroform-*d*)  $\delta$  154.8 (d,  $J = 3.3$  Hz), 148.4, 130.2, 130.2 (t,  $J = 270.9$  Hz), 129.3, 128.7, 128.2, 125.5, 118.3, 114.2, 97.5 (d,  $J = 3.2$  Hz), 66.2 (dd,  $J = 37.3, 21.7$  Hz), 46.8, 31.5, 30.4, 20.2, 13.9.

HRMS (ESI)  $m/z$ :  $[\text{M}+\text{H}]^+$  Calcd. for  $\text{C}_{20}\text{H}_{22}\text{F}_2\text{NO}^+$  330.1664; Found: 330.1662.

#### N-ethyl-2,2-difluoro-N,5-diphenyl-2,3-dihydrofuran-3-amine (5k)

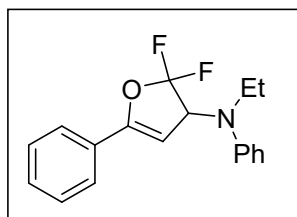

Following the experimental procedures (Condition A) on 0.2 mmol scale, brown solid (mp: 82 – 84 °C), yield: 94% (56.7mg), column chromatography (silica gel, PE: EA = 15:1, v/v).

$^1\text{H}$  NMR (500 MHz, Chloroform-*d*)  $\delta$  7.76 – 7.69 (m, 2H), 7.50 (m,  $J = 6.6, 2.6$  Hz, 3H), 7.35 (tq,  $J = 7.2, 2.0$  Hz, 2H), 6.97 (m,  $J = 8.8, 2.4$  Hz, 2H), 6.89 (m,  $J = 7.5, 2.5$  Hz, 1H), 5.70 (q,  $J = 2.6, 2.2$  Hz, 1H), 5.31 (m,  $J = 12.9, 6.3, 2.9$  Hz, 1H), 3.44 (m,  $J = 7.1, 2.1$  Hz, 2H), 1.30 – 1.23 (m, 3H).

$^{19}\text{F}$  NMR (471 MHz, Chloroform-*d*)  $\delta$  -66.3 (d,  $J = 149.8$  Hz), -80.7 (d,  $J = 149.8$  Hz).

$^{13}\text{C}$  NMR (126 MHz, Chloroform-*d*)  $\delta$  154.8 (d,  $J = 3.7$  Hz), 148.1, 130.3, 130.2 (t,  $J = 270.6$  Hz), 129.4, 128.7, 128.1, 125.5, 118.3, 113.9, 97.4 (d,  $J = 3.0$  Hz), 66.0 (dd,  $J = 37.5, 21.9$  Hz), 41.2, 14.9.

HRMS (ESI)  $m/z$ :  $[\text{M}+\text{H}]^+$  Calcd. for  $\text{C}_{18}\text{H}_{18}\text{F}_2\text{NO}^+$  302.1351; Found: 302.1352.

#### 2,2-difluoro-N, N-diisopropyl-5-phenyl-2,3-dihydrofuran-3-amine (5l)

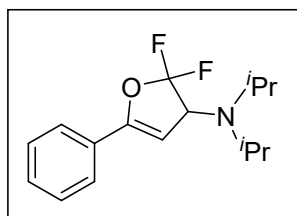

Following the experimental procedures (Condition A) on 0.2 mmol scale, brown solid (mp: 63 – 65 °C), yield: 95% (53.5 mg), column chromatography (silica gel, PE: EA = 15:1, v/v).

$^1\text{H}$  NMR (500 MHz, Chloroform-*d*)  $\delta$  7.64 – 7.59 (m, 2H), 7.43 – 7.35 (m, 3H), 5.51 (t,  $J = 2.3$  Hz, 1H), 4.46 (m,  $J = 17.1, 7.6, 2.7$  Hz, 1H), 3.13 (p,  $J = 6.7$  Hz, 2H), 1.11 (d,  $J = 6.7$  Hz, 6H), 1.06 (d,  $J = 6.6$  Hz, 6H).



**<sup>19</sup>F NMR (471 MHz, Chloroform-*d*)**  $\delta$  -68.8 (d,  $J$  = 150.6 Hz), -80.6 (d,  $J$  = 150.1 Hz).

**<sup>13</sup>C NMR (126 MHz, Chloroform-*d*)**  $\delta$  152.9 (d,  $J$  = 3.7 Hz), 130.6 (t,  $J$  = 268.7 Hz), 129.5, 128.8, 128.5, 125.2, 100.6 (d,  $J$  = 4.3 Hz), 62.7 (dd,  $J$  = 37.2, 21.1 Hz), 45.8, 22.9, 22.6.

**HRMS (ESI)  $m/z$ :** [M+H]<sup>+</sup> Calcd. for C<sub>16</sub>H<sub>22</sub>F<sub>2</sub>NO<sup>+</sup> 282.1664; Found: 282.1664.

**tert-butyl 4-(2,2-difluoro-5-phenyl-2,3-dihydrofuran-3-yl) piperazine-1-carboxylate (5m)**

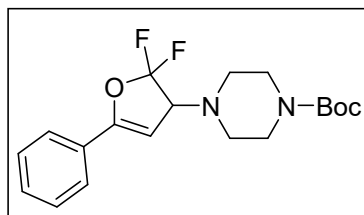

Following the experimental procedures (Condition A) on 0.2 mmol scale, brown oil, yield: 93% (68.1 mg), column chromatography (silica gel, PE: EA = 15:1, v/v).

**<sup>1</sup>H NMR (500 MHz, Chloroform-*d*)**  $\delta$  7.61 – 7.56 (m, 2H), 7.41 – 7.36 (m, 3H), 5.54 (t,  $J$  = 2.4 Hz, 1H), 4.18 (m,  $J$  = 15.2, 7.0, 2.7 Hz, 1H), 3.50 – 3.37 (m, 4H), 2.79 (m,  $J$  = 10.9, 5.0 Hz, 2H), 2.67 (m,  $J$  = 11.2, 5.1 Hz, 2H), 1.45 (s, 9H).

**<sup>19</sup>F NMR (471 MHz, Chloroform-*d*)**  $\delta$  -61.9 (d,  $J$  = 150.1 Hz), -83.7 (d,  $J$  = 150.9 Hz).

**<sup>13</sup>C NMR (126 MHz, Chloroform-*d*)**  $\delta$  154.8 (d,  $J$  = 3.6 Hz), 154.7, 130.7 (dd,  $J$  = 273.4, 270.6 Hz), 130.1, 128.6, 128.0, 125.4, 96.4 (d,  $J$  = 2.7 Hz), 79.8, 71.0 (dd,  $J$  = 35.5, 18.9 Hz), 48.9, 28.4.

**HRMS (ESI)  $m/z$ :** [M+H]<sup>+</sup> Calcd. for C<sub>19</sub>H<sub>25</sub>F<sub>2</sub>N<sub>2</sub>O<sub>3</sub><sup>+</sup> 367.1828; Found: 367.1826.

**tert-butyl 4-(5-(3,5-dimethylphenyl)-2,2-difluoro-2,3-dihydrofuran-3-yl) piperazine-1-carboxylate (5n)**

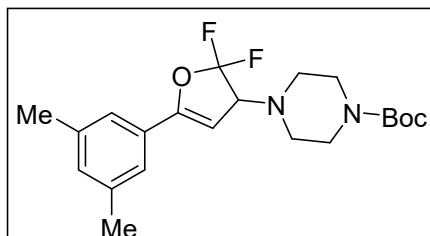

Following the experimental procedures (Condition A) on 0.2 mmol scale, brown oil, yield: 94% (74.3 mg), column chromatography (silica gel, PE: EA = 15:1, v/v).

**<sup>1</sup>H NMR (500 MHz, Chloroform-*d*)**  $\delta$  7.21 (s, 2H), 7.02 (s, 1H), 5.50 (t,  $J$  = 2.4 Hz, 1H), 4.15 (m,  $J$  = 15.1, 6.9, 2.7 Hz, 1H), 3.42 (t,  $J$  = 5.2 Hz, 4H), 2.78 (m,  $J$  = 10.9, 5.0 Hz, 2H), 2.66 (m,  $J$  = 11.7, 5.5

Hz, 2H), 2.33 (s, 6H), 1.46 (s, 9H).

<sup>19</sup>F NMR (471 MHz, Chloroform-*d*) δ -61.8 (d, *J* = 150.5 Hz), -83.4 (d, *J* = 150.7 Hz).

<sup>13</sup>C NMR (126 MHz, Chloroform-*d*) δ 155.1, 154.7, 138.2, 131.8, 130.8 (*J* = 273.4, 270.6 Hz), 123.1, 96.02, 79.7, 71.0 (dd, *J* = 35.6, 18.9 Hz), 48.9, 28.4, 21.2.

HRMS (ESI) *m/z*: [M+H]<sup>+</sup> Calcd. for C<sub>21</sub>H<sub>29</sub>F<sub>2</sub>N<sub>2</sub>O<sub>3</sub>+ 395.2141; Found: 395.2145.

**tert-butyl 4-(5-(4-ethylphenyl)-2,2-difluoro-2,3-dihydrofuran-3-yl) piperazine-1-carboxylate (5o)**

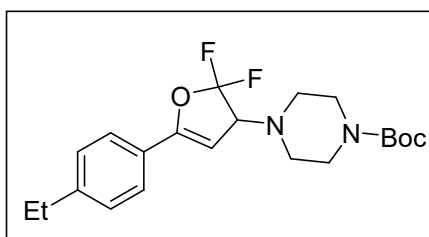

Following the experimental procedures (Condition A) on 0.2 mmol scale, brown oil, yield: 96% (75.8 mg), column chromatography (silica gel, PE: EA = 15:1, v/v).

<sup>1</sup>H NMR (500 MHz, Chloroform-*d*) δ 7.52 – 7.49 (m, 2H), 7.22 (d, *J* = 8.1 Hz, 2H), 5.48 (t, *J* = 2.4 Hz, 1H), 4.16 m, *J* = 15.2, 6.9, 2.7 Hz, 1H), 3.47 – 3.37 (m, 4H), 2.78 (m, *J* = 10.9, 5.1 Hz, 2H), 2.66 (q, *J* = 7.5 Hz, 4H), 1.45 (s, 9H), 1.23 (t, *J* = 7.6 Hz, 3H).

<sup>19</sup>F NMR (471 MHz, Chloroform-*d*) δ -61.8 (d, *J* = 150.6 Hz), -83.4 (d, *J* = 150.9 Hz).

<sup>13</sup>C NMR (126 MHz, Chloroform-*d*) δ 155.0, 154.7, 146.7, 130.8 (*J* = 273.4, 270.6 Hz), 128.1, 125.5, 125.4, 95.4 (d, *J* = 3.1 Hz), 79.7, 71.0 (dd, *J* = 35.5, 18.9 Hz), 48.9, 28.8, 28.4, 15.4.

HRMS (ESI) *m/z*: [M+H]<sup>+</sup> Calcd. for C<sub>21</sub>H<sub>29</sub>F<sub>2</sub>N<sub>2</sub>O<sub>3</sub>+ 395.2141; Found: 395.2138.

**tert-butyl 4-(5-([1,1'-biphenyl]-4-yl)-2,2-difluoro-2,3-dihydrofuran-3-yl) piperazine-1-carboxylate (5p)**

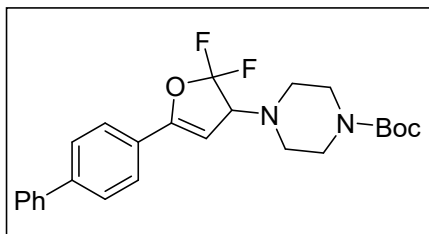

Following the experimental procedures (Condition A) on 0.2 mmol scale, brown solid (mp: 119 – 121 °C), yield: 95% (84.0 mg), column chromatography (silica gel, PE: EA = 15:1, v/v).

<sup>1</sup>H NMR (500 MHz, Chloroform-*d*) δ 7.69 – 7.57 (m, 6H), 7.46 (m, *J* = 8.4, 6.9 Hz, 2H), 7.41 – 7.36

(m, 1H), 5.58 (t,  $J = 2.4$  Hz, 1H), 4.21 (m,  $J = 15.1, 7.0, 2.7$  Hz, 1H), 3.45 (t,  $J = 5.2$  Hz, 4H), 2.81 (m,  $J = 11.0, 5.1$  Hz, 2H), 2.70 (m,  $J = 11.2, 5.2$  Hz, 2H), 1.47 (s, 9H).

$^{19}\text{F}$  NMR (471 MHz, Chloroform-*d*)  $\delta$  -61.8 (d,  $J = 150.9$  Hz), -83.2 (d,  $J = 151.1$  Hz).

$^{13}\text{C}$  NMR (126 MHz, Chloroform-*d*)  $\delta$  154.1 (d,  $J = 3.3$  Hz), 130.8 (dd,  $J = 274.6, 272.2$  Hz), 129.8, 128.5 (d,  $J = 24.6$  Hz), 125.3, 97.6 (d,  $J = 2.8$  Hz), 68.5 (dd,  $J = 34.9, 19.3$  Hz), 50.3 (d,  $J = 2.3$  Hz), 24.1.

HRMS (ESI)  $m/z$ :  $[\text{M}+\text{H}]^+$  Calcd. for  $\text{C}_{25}\text{H}_{29}\text{F}_2\text{N}_2\text{O}_3^+$  443.2141; Found: 443.2145.

**tert-butyl 4-(2,2-difluoro-5-(4-methoxyphenyl)-2,3-dihydrofuran-3-yl) piperazine-1-carboxylate (5q)**

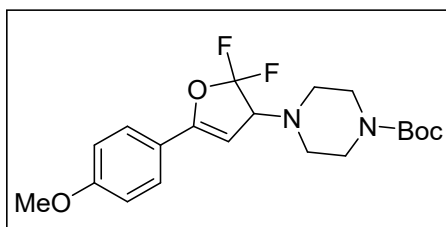

Following the experimental procedures (Condition A) on 0.2 mmol scale, brown solid (mp: 85 – 87 °C), yield: 93% (73.8 mg), column chromatography (silica gel, PE: EA = 15:1, v/v).

$^1\text{H}$  NMR (500 MHz, Chloroform-*d*)  $\delta$  7.50 (d,  $J = 8.6$  Hz, 2H), 7.35 (d,  $J = 8.7$  Hz, 2H), 5.53 (t,  $J = 2.4$  Hz, 1H), 4.16 (m,  $J = 15.2, 7.2, 2.7$  Hz, 1H), 3.47 – 3.34 (m, 4H), 2.76 (m,  $J = 10.7, 5.0$  Hz, 2H), 2.65 (m,  $J = 11.0, 5.0$  Hz, 2H), 1.44 (s, 9H).

$^{19}\text{F}$  NMR (471 MHz, Chloroform-*d*)  $\delta$  -61.9 (d,  $J = 150.0$  Hz), -83.1 (d,  $J = 150.6$  Hz).

$^{13}\text{C}$  NMR (126 MHz, Chloroform-*d*)  $\delta$  154.7, 153.7 (d,  $J = 3.7$  Hz), 136.0, 130.7 (dd,  $J = 273.9, 270.8$  Hz), 128.9, 126.7, 126.5, 97.1 (d,  $J = 2.9$  Hz), 79.7, 71.1 (dd,  $J = 35.3, 18.9$  Hz), 48.9, 28.4.

HRMS (ESI)  $m/z$ :  $[\text{M}+\text{H}]^+$  Calcd. for  $\text{C}_{20}\text{H}_{27}\text{F}_2\text{N}_2\text{O}_4^+$  397.1933; Found: 397.1934.

**tert-butyl 4-(2,2-difluoro-5-(4-nitrophenyl)-2,3-dihydrofuran-3-yl) piperazine-1-carboxylate (5r)**

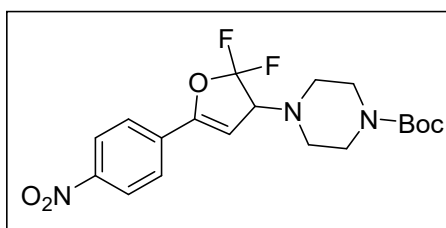

Following the experimental procedures (Condition A) on 0.2 mmol scale, brown oil, yield: 94% (77.4 mg), column chromatography (silica gel, PE: EA = 10:1, v/v).

**<sup>1</sup>H NMR (500 MHz, Chloroform-*d*)**  $\delta$  8.29 – 8.19 (m, 2H), 7.81 – 7.63 (m, 2H), 5.80 (t,  $J = 2.4$  Hz, 1H), 4.22 (m,  $J = 15.1, 7.5, 2.8$  Hz, 1H), 3.48 – 3.37 (m, 4H), 2.76 (m,  $J = 10.6, 5.0$  Hz, 2H), 2.68 (m,  $J = 10.9, 5.0$  Hz, 2H), 1.43 (s, 9H).

**<sup>19</sup>F NMR (471 MHz, Chloroform-*d*)**  $\delta$  -61.9 (d,  $J = 150.0$  Hz), -82.7 (d,  $J = 150.0$  Hz).

**<sup>13</sup>C NMR (126 MHz, Chloroform-*d*)**  $\delta$  154.6, 152.5 (d,  $J = 3.7$  Hz), 148.4, 133.7, 130.5 (dd,  $J = 275.0, 271.7$  Hz), 126.2, 124.0, 101.1 (d,  $J = 3.0$  Hz), 79.8, 71.1 (dd,  $J = 35.3, 19.1$  Hz), 49.0, 28.4.

**HRMS (ESI) m/z:** [M+H]<sup>+</sup> Calcd. for C<sub>19</sub>H<sub>24</sub>F<sub>2</sub>N<sub>3</sub>O<sub>5</sub><sup>+</sup> 412.1679; Found: 412.1674

**tert-butyl 4-(5-(4-bromophenyl)-2,2-difluoro-2,3-dihydrofuran-3-yl) piperazine-1-carboxylate (5s)**

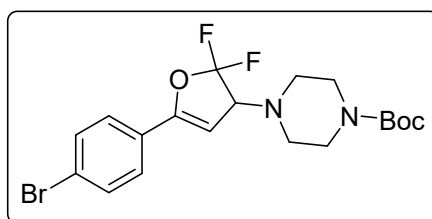

Following the experimental procedures (Condition A) on 0.2 mmol scale, brown oil, yield: 75% (66.7 mg), column chromatography (silica gel, PE: EA = 15:1, v/v).

**<sup>1</sup>H NMR (500 MHz, Chloroform-*d*)**  $\delta$  7.51 (dd,  $J = 8.7, 1.0$  Hz, 2H), 7.45 – 7.40 (m, 2H), 5.55 (t,  $J = 2.3$  Hz, 1H), 4.15 (m,  $J = 15.2, 7.2, 2.7$  Hz, 1H), 3.49 – 3.33 (m, 4H), 2.76 (dt,  $J = 10.8, 5.0$  Hz, 2H), 2.65 (dt,  $J = 10.7, 4.9$  Hz, 2H), 1.44 (d,  $J = 1.0$  Hz, 9H).

**<sup>19</sup>F NMR (471 MHz, Chloroform-*d*)**  $\delta$  -61.8 (d,  $J = 150.9$  Hz), -83.1 (d,  $J = 150.4$  Hz).

**<sup>13</sup>C NMR (126 MHz, Chloroform-*d*)**  $\delta$  154.6, 153.8 (d,  $J = 3.6$  Hz), 131.9, 130.7 (dd,  $J = 274.0, 270.9$  Hz), 126.9, 126.9, 124.3, 97.2 (d,  $J = 2.7$  Hz), 79.7, 71.1 (dd,  $J = 35.4, 19.0$  Hz), 48.9, 28.4.

**HRMS (ESI) m/z:** [M+H]<sup>+</sup> Calcd. for C<sub>19</sub>H<sub>24</sub>BrF<sub>2</sub>N<sub>2</sub>O<sub>3</sub><sup>+</sup> 445.0933; Found: 445.0933.

**tert-butyl 4-(5-(4-chlorophenyl)-2,2-difluoro-2,3-dihydrofuran-3-yl)piperazine-1-carboxylate 5(9t)**

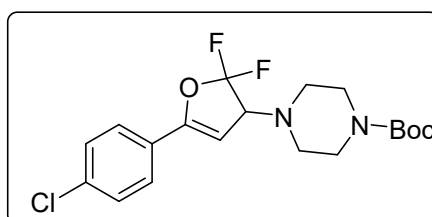

Following the experimental procedures (Condition A) on 0.2 mmol scale, brown oil, yield: 72% (64.2 mg), column chromatography (silica gel, PE: EA = 15:1, v/v).

**<sup>1</sup>H NMR (500 MHz, Chloroform-*d*)**  $\delta$  7.50 (d,  $J$  = 8.6 Hz, 2H), 7.35 (d,  $J$  = 8.7 Hz, 2H), 5.53 (t,  $J$  = 2.4 Hz, 1H), 4.16 (ddd,  $J$  = 15.2, 7.2, 2.7 Hz, 1H), 3.47 – 3.34 (m, 4H), 2.76 (dt,  $J$  = 10.7, 5.0 Hz, 2H), 2.65 (dt,  $J$  = 11.0, 5.0 Hz, 2H), 1.44 (s, 9H).

**<sup>19</sup>F NMR (471 MHz, Chloroform-*d*)**  $\delta$  -62.0 (d,  $J$  = 150.0 Hz), -83.1 (d,  $J$  = 150.6 Hz).

**<sup>13</sup>C NMR (126 MHz, Chloroform-*d*)**  $\delta$  154.7, 153.7 (d,  $J$  = 3.7 Hz), 136.0, 130.7 (dd,  $J$  = 273.9, 270.8 Hz), 128.9, 126.7, 126.5, 97.1 (d,  $J$  = 2.9 Hz), 79.7, 71.1 (dd,  $J$  = 35.3, 18.9 Hz), 48.9, 28.4.

**HRMS (ESI) m/z:** [M+H]<sup>+</sup> Calcd. for C<sub>19</sub>H<sub>24</sub>ClF<sub>2</sub>N<sub>2</sub>O<sub>3</sub><sup>+</sup> 401.1438; Found: 401.1439

**tert-butyl-4-(2,2-difluoro-5-(3-(trifluoromethyl)phenyl)-2,3-dihydrofuran-3-yl)piperazine-1-carboxylate (5u)**

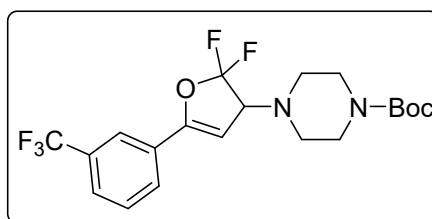

Following the experimental procedures (Condition A) on 0.2 mmol scale, brown solid (mp: 110 – 112 °C), yield: 98% (85.2 mg), column chromatography (silica gel, PE: EA = 15:1, v/v).

**<sup>1</sup>H NMR (500 MHz, Chloroform-*d*)**  $\delta$  7.83 (s, 1H), 7.77 (d,  $J$  = 7.8 Hz, 1H), 7.64 (d,  $J$  = 7.8 Hz, 1H), 7.53 (t,  $J$  = 7.8 Hz, 1H), 5.67 (t,  $J$  = 2.4 Hz, 1H), 4.21 (ddd,  $J$  = 15.1, 7.2, 2.7 Hz, 1H), 3.43 (t,  $J$  = 5.0 Hz, 4H), 2.84 – 2.72 (m, 2H), 2.69 (q,  $J$  = 6.2, 5.8 Hz, 2H), 1.45 (s, 9H).

**<sup>19</sup>F NMR (471 MHz, Chloroform-*d*)**  $\delta$  -62.0 (d,  $J$  = 150.4 Hz), -62.9, -83.1 (d,  $J$  = 150.6 Hz).

**<sup>13</sup>C NMR (126 MHz, Chloroform-*d*)**  $\delta$  154.7, 153.3 (d,  $J$  = 3.6 Hz), 130.6 (dd,  $J$  = 273.9, 270.8 Hz), 131.3 (q,  $J$  = 32.9 Hz), 129.3, 128.8, 128.5, 126.6 (q,  $J$  = 3.7 Hz), 123.7 (q,  $J$  = 272.2 Hz), 122.2 (q,  $J$  = 3.8 Hz), 98.3 (d,  $J$  = 2.7 Hz), 79.8, 71.0 (dd,  $J$  = 35.3, 19.0 Hz), 48.9, 28.4.

**HRMS (ESI) m/z:** [M+H]<sup>+</sup> Calcd. for C<sub>20</sub>H<sub>24</sub>F<sub>5</sub>N<sub>2</sub>O<sub>3</sub><sup>+</sup> 435.1702; Found: 435.1702.

**1-(5-(4-bromophenyl)-2,2-difluoro-2,3-dihydrofuran-3-yl) piperidine (5v)**

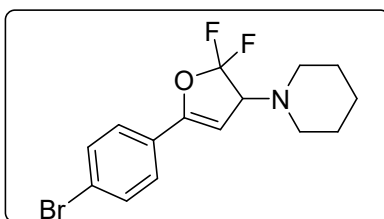

Following the experimental procedures (Condition A) on 0.2 mmol scale, brown oil, yield: 84% (57.8 mg), column chromatography (silica gel, PE: EA = 15:1, v/v).

**<sup>1</sup>H NMR (500 MHz, Chloroform-*d*)**  $\delta$  7.52 (d,  $J$  = 8.6 Hz, 2H), 7.45 (d,  $J$  = 8.6 Hz, 2H), 5.58 (t,  $J$  = 2.4 Hz, 1H), 4.13 (ddd,  $J$  = 15.5, 7.6, 2.7 Hz, 1H), 2.78 (dt,  $J$  = 11.0, 5.8 Hz, 2H), 2.67 (dt,  $J$  = 11.0, 5.0 Hz, 2H), 1.57 (tdd,  $J$  = 8.0, 6.1, 3.7 Hz, 4H), 1.47 (p,  $J$  = 5.6 Hz, 2H).

**<sup>19</sup>F NMR (471 MHz, Chloroform-*d*)**  $\delta$  -61.2 (d,  $J$  = 149.9 Hz), -83.0 (d,  $J$  = 149.8 Hz).

**<sup>13</sup>C NMR (126 MHz, Chloroform-*d*)**  $\delta$  153.1 (d,  $J$  = 3.7 Hz), 131.8, 131.0 (dd,  $J$  = 275.2, 271.1 Hz), 127.2, 126.8, 124.0, 98.1 (d,  $J$  = 3.1 Hz), 71.7 (dd,  $J$  = 34.7, 18.9 Hz), 50.3, 26.4, 24.4.

**HRMS (ESI) m/z:** [M+H]<sup>+</sup> Calcd. for C<sub>15</sub>H<sub>17</sub>BrF<sub>2</sub>NO<sup>+</sup> 344.0456; Found: 344.0461

#### 1-(2,2-difluoro-5-(4-fluorophenyl)-2,3-dihydrofuran-3-yl)piperidine (**5w**)

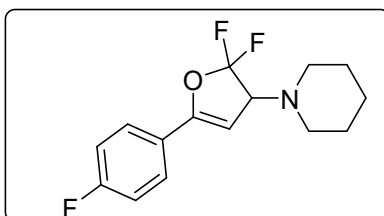

Following the experimental procedures (Condition A) on 0.2 mmol scale, brown oil, yield: 91% (51.6 mg), column chromatography (silica gel, PE: EA = 15:1, v/v).

**<sup>1</sup>H NMR (500 MHz, Chloroform-*d*)**  $\delta$  7.60 – 7.54 (m, 2H), 7.08 (t,  $J$  = 8.6 Hz, 2H), 5.51 (t,  $J$  = 2.5 Hz, 1H), 4.14 (ddd,  $J$  = 15.5, 7.5, 2.7 Hz, 1H), 2.79 (dt,  $J$  = 11.0, 5.2 Hz, 2H), 2.67 (dt,  $J$  = 11.0, 5.3 Hz, 2H), 1.62 – 1.52 (m, 4H), 1.47 (p,  $J$  = 5.8 Hz, 2H).

**<sup>19</sup>F NMR (471 MHz, Chloroform-*d*)**  $\delta$  -61.2 (d,  $J$  = 150.0 Hz), -83.1 (d,  $J$  = 150.0 Hz), -110.2.

**<sup>13</sup>C NMR (126 MHz, Chloroform-*d*)**  $\delta$  163.6 (d,  $J$  = 250.6 Hz), 153.2 (d,  $J$  = 3.9 Hz), 131.0 (dd,  $J$  = 274.8, 271.0 Hz), 127.3 (d,  $J$  = 8.4 Hz), 124.6 (d,  $J$  = 3.4 Hz), 115.7 (d,  $J$  = 22.1 Hz), 97.0, 71.7 (dd,  $J$  = 34.7, 18.8 Hz), 50.2, 26.4, 24.4.

**HRMS (ESI) m/z:** [M+H]<sup>+</sup> Calcd. for C<sub>15</sub>H<sub>17</sub>F<sub>3</sub>NO<sup>+</sup> 284.1257; Found: 284.1260.

**1-(2,2-difluoro-5-(2-fluoro-5-methylphenyl)-2,3-dihydrofuran-3-yl) piperidine (5x)**

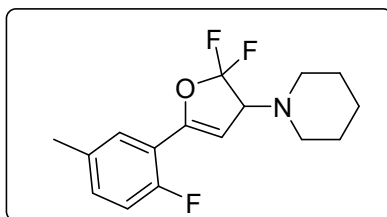

Following the experimental procedures (Condition A) on 0.2 mmol scale, brown oil, yield: 93% (55.4 mg), column chromatography (silica gel, PE: EA = 15:1, v/v).

**<sup>1</sup>H NMR (500 MHz, Chloroform-*d*)**  $\delta$  7.43 (dd,  $J = 7.2, 2.3$  Hz, 1H), 7.12 (ddd,  $J = 7.7, 4.9, 2.3$  Hz, 1H), 6.99 (dd,  $J = 11.2, 8.4$  Hz, 1H), 5.80 (d,  $J = 2.6$  Hz, 1H), 4.16 (ddd,  $J = 15.7, 7.7, 2.7$  Hz, 1H), 2.79 (dt,  $J = 10.9, 5.4$  Hz, 2H), 2.68 (dt,  $J = 11.0, 5.3$  Hz, 2H), 2.33 (s, 3H), 1.58 (qq,  $J = 8.0, 4.2, 3.3$  Hz, 4H), 1.47 (p,  $J = 6.0$  Hz, 2H).

**<sup>19</sup>F NMR (471 MHz, Chloroform-*d*)**  $\delta$  -62.0 (d,  $J = 150.0$  Hz), -84.1 (d,  $J = 150.2$  Hz), -116.6.

**<sup>13</sup>C NMR (126 MHz, Chloroform-*d*)**  $\delta$  158.8 (d,  $J = 251.1$  Hz), 148.2, 133.8 (d,  $J = 3.6$  Hz), 131.3 (d,  $J = 8.4$  Hz), 130.4 (dd,  $J = 273.8, 269.9$  Hz), 127.8 (d,  $J = 2.2$  Hz), 116.1 (d,  $J = 11.2$  Hz), 115.5 (d,  $J = 21.6$  Hz), 103.3 (dd,  $J = 13.8, 2.9$  Hz), 71.9 (dd,  $J = 34.7, 18.8$  Hz), 50.3, 26.4, 24.4, 20.6.

**HRMS (ESI)  $m/z$ :** [M+H]<sup>+</sup> Calcd. for C<sub>16</sub>H<sub>19</sub>F<sub>3</sub>NO<sup>+</sup> 298.1413; Found: 298.1411

**N, N-dibenzyl-2,2-difluoro-5-phenyl-2,3-dihydrofuran-3-amine (5y)**

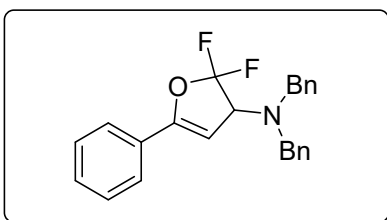

Following the experimental procedures (Condition A) on 0.2 mmol scale, brown solid (mp: 70 – 72 °C), yield: 85% (64.2 mg), column chromatography (silica gel, PE: EA = 15:1, v/v).

**<sup>1</sup>H NMR (500 MHz, Chloroform-*d*)**  $\delta$  7.61 (dt,  $J = 6.0, 3.0$  Hz, 2H), 7.49 – 7.36 (m, 11H), 7.34 – 7.28 (m, 2H), 5.56 (t,  $J = 2.6$  Hz, 1H), 4.45 (dtd,  $J = 14.7, 4.6, 2.6$  Hz, 1H), 3.98 (dd,  $J = 14.1, 3.5$  Hz, 2H), 3.90 (dq,  $J = 14.0, 2.0$  Hz, 2H).

**<sup>19</sup>F NMR (471 MHz, Chloroform-*d*)**  $\delta$  -62.0 (d,  $J = 150.1$  Hz), -80.3 (d,  $J = 150.1$  Hz).

**<sup>13</sup>C NMR (126 MHz, Chloroform-*d*)**  $\delta$  154.5 (d,  $J = 3.5$  Hz), 139.4, 131.7 (t,  $J = 273.0$  Hz), 129.9, 128.8, 128.6, 128.4, 128.3, 127.3, 125.3, 98.4 (d,  $J = 3.4$  Hz), 66.2 (dd,  $J = 34.4, 19.1$  Hz), 54.5.

**HRMS (ESI) m/z:** [M+H]<sup>+</sup> Calcd. for C<sub>24</sub>H<sub>22</sub>F<sub>2</sub>NO<sup>+</sup> 378.1664; Found: 378.1659

**N-benzyl-2,2-difluoro-N-methyl-5-phenyl-2,3-dihydrofuran-3-amine (5z)**

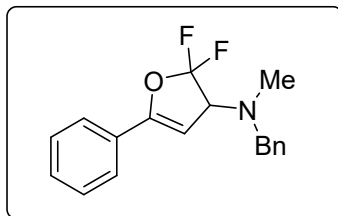

Following the experimental procedures (Condition A) on 0.2 mmol scale, brown oil, yield: 99% (62.5 mg), column chromatography (silica gel, PE: EA = 15:1, v/v).

**<sup>1</sup>H NMR (500 MHz, Chloroform-*d*)**  $\delta$  7.70 – 7.55 (m, 2H), 7.46 – 7.35 (m, 7H), 7.31 (ddt, *J* = 9.5, 3.8, 1.9 Hz, 1H), 5.61 (d, *J* = 2.2 Hz, 1H), 4.40 (ddt, *J* = 14.8, 7.8, 2.3 Hz, 1H), 3.99 – 3.74 (m, 2H), 2.48 (d, *J* = 1.5 Hz, 3H).

**<sup>19</sup>F NMR (471 MHz, Chloroform-*d*)**  $\delta$  -61.5 (d, *J* = 150.7 Hz), -82.1 (d, *J* = 150.6 Hz).

**<sup>13</sup>C NMR (126 MHz, Chloroform-*d*)**  $\delta$  154.4 (d, *J* = 3.7 Hz), 139.3, 131.5 (t, *J* = 273.0 Hz), 130.0, 128.6, 128.6, 128.4, 128.3, 127.2, 125.4, 98.1 (d, *J* = 3.2 Hz), 70.2 (dd, *J* = 34.3, 19.3 Hz), 57.4, 38.0 (d, *J* = 2.6 Hz).

**HRMS (ESI) m/z:** [M+H]<sup>+</sup> Calcd. for C<sub>18</sub>H<sub>18</sub>F<sub>2</sub>NO<sup>+</sup> 302.1351; Found: 302.1355

**5-([1,1'-biphenyl]-4-yl)-N,N-diallyl-2,2-difluoro-2,3-dihydrofuran-3-amine (5aa)**

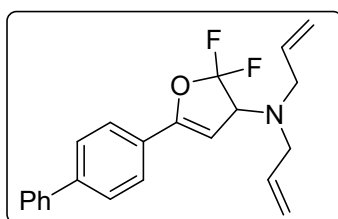

Following the experimental procedures (Condition A) on 0.2 mmol scale, brown solid (mp: 108 – 110 °C), yield: 85% (60.1 mg), column chromatography (silica gel, PE: EA = 15:1, v/v).

**<sup>1</sup>H NMR (500 MHz, Chloroform-*d*)**  $\delta$  7.69 – 7.59 (m, 6H), 7.46 (dd, *J* = 8.4, 6.9 Hz, 2H), 7.42 – 7.35 (m, 1H), 5.83 (ddt, *J* = 16.7, 10.3, 6.2 Hz, 2H), 5.56 (t, *J* = 2.4 Hz, 1H), 5.24 (dt, *J* = 17.2, 1.6 Hz, 2H), 5.16 (dt, *J* = 10.0, 1.5 Hz, 2H), 4.50 (ddd, *J* = 15.1, 8.2, 2.8 Hz, 1H), 3.37 (ddt, *J* = 14.6, 5.6, 1.6 Hz, 2H), 3.32 – 3.25 (m, 2H).

**<sup>19</sup>F NMR (471 MHz, Chloroform-*d*)**  $\delta$  -62.9 (d, *J* = 150.3 Hz), -80.5 (d, *J* = 150.7 Hz).



<sup>13</sup>C NMR (126 MHz, Chloroform-*d*) δ 153.9 (d, *J* = 3.6 Hz), 142.6, 140.2, 136.3, 131.3 (t, *J* = 273.0 Hz), 128.9, 127.8, 127.2, 127.2, 127.1, 125.8, 117.4, 98.5 (d, *J* = 3.6 Hz), 67.1 (dd, *J* = 34.8, 19.4 Hz), 53.3 (d, *J* = 2.4 Hz).

HRMS (ESI) *m/z*: [M+H]<sup>+</sup> Calcd. For C<sub>22</sub>H<sub>22</sub>F<sub>2</sub>NO<sup>+</sup> 354.1664; Found: 354.1660

**5-([1,1'-biphenyl]-2-yl)-N,N-diallyl-2,2-difluoro-2,3-dihydrofuran-3-amine (5ab)**

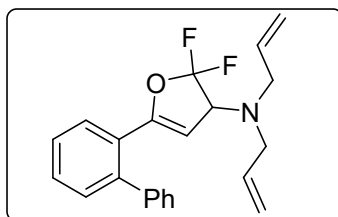

Following the experimental procedures (Condition A) on 0.2 mmol scale, yellow oil, yield: 43% (30.4 mg), column chromatography (silica gel, PE: EA = 15:1, v/v).

<sup>1</sup>H NMR (500 MHz, Chloroform-*d*) δ 7.69 – 7.66 (m, 1H), 7.44 – 7.37 (m, 5H), 7.35 – 7.29 (m, 3H), 5.68 (ddt, *J* = 16.6, 10.1, 6.3 Hz, 2H), 5.20 – 5.03 (m, 4H), 4.47 (t, *J* = 2.3 Hz, 1H), 4.22 (ddd, *J* = 15.4, 8.6, 2.7 Hz, 1H), 3.23 – 3.05 (m, 4H).

<sup>19</sup>F NMR (471 MHz, Chloroform-*d*) δ -63.5 (d, *J* = 151.0 Hz), -81.1 (d, *J* = 150.9 Hz).

<sup>13</sup>C NMR (126 MHz, Chloroform-*d*) δ 153.0 (d, *J* = 3.6 Hz), 141.5, 141.2, 136.1, 130.8 (dd, *J* = 273.8, 269.9 Hz), 130.7, 129.4, 128.8, 128.5, 127.9, 127.5, 127.5, 127.2, 117.4, 103.7 (d, *J* = 3.4 Hz), 67.2 (dd, *J* = 34.7, 19.2 Hz), 53.2 (d, *J* = 2.7 Hz).

HRMS (ESI) *m/z*: [M+H]<sup>+</sup> Calcd. For C<sub>22</sub>H<sub>22</sub>F<sub>2</sub>NO<sup>+</sup> 354.1664; Found: 354.1666

**N, N-diallyl-2,2-difluoro-5-(4-fluorophenyl)-2,3-dihydrofuran-3-amine (5ac)**

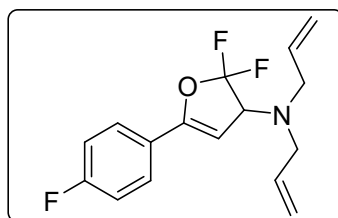

Following the experimental procedures (Condition A) on 0.2 mmol scale, yellow oil, yield: 75% (44.4 mg), column chromatography (silica gel, PE: EA = 15:1, v/v).

<sup>1</sup>H NMR (500 MHz, Chloroform-*d*) δ 7.42 – 7.35 (m, 2H), 7.33 – 7.26 (m, 1H), 7.11 (ddd, *J* = 9.3, 6.6, 2.4 Hz, 1H), 5.84 (ddt, *J* = 16.9, 10.1, 6.2 Hz, 2H), 5.58 (t, *J* = 2.4 Hz, 1H), 5.26 (dq, *J* = 17.2, 1.7

Hz, 2H), 5.18 (dq,  $J = 10.2, 1.4$  Hz, 2H), 4.51 (ddd,  $J = 15.0, 8.4, 2.8$  Hz, 1H), 3.37 (ddt,  $J = 14.6, 5.6, 1.7$  Hz, 2H), 3.29 (ddd,  $J = 14.6, 7.0, 1.6$  Hz, 2H).

**$^{19}\text{F}$  NMR (471 MHz, Chloroform-*d*)**  $\delta$  -63.1 (d,  $J = 150.3$  Hz), -80.4 (d,  $J = 150.6$  Hz), -112.3.

**$^{13}\text{C}$  NMR (126 MHz, Chloroform-*d*)**  $\delta$  162.8 (d,  $J = 246.5$  Hz), 152.9 (t,  $J = 3.4$  Hz), 136.1, 131.2 (t,  $J = 273.0$  Hz), 130.4 (d,  $J = 8.2$  Hz), 130.3 (d,  $J = 8.2$  Hz), 121.0 (d,  $J = 3.1$  Hz), 117.4, 116.8 (d,  $J = 21.3$  Hz), 112.3 (d,  $J = 23.6$  Hz), 99.8 (d,  $J = 3.6$  Hz), 67.0 (dd,  $J = 34.6, 19.4$  Hz), 53.3 (d,  $J = 2.7$  Hz).

**HRMS (ESI)  $m/z$ :**  $[\text{M}+\text{H}]^+$  Calcd. for  $\text{C}_{16}\text{H}_{17}\text{F}_3\text{NO}^+$  296.1257; Found: 296.1255

#### **N,N-diallyl-5-(4-chlorophenyl)-2,2-difluoro-2,3-dihydrofuran-3-amine (5ad)**

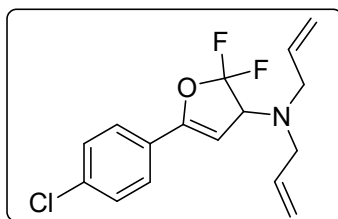

Following the experimental procedures (Condition A) on 0.2 mmol scale, brown solid (mp: 114– 116 °C), yield: 68% (42.4 mg), column chromatography (silica gel, PE: EA = 15:1, v/v).

**$^1\text{H}$  NMR (500 MHz, Chloroform-*d*)**  $\delta$  7.54 (d,  $J = 8.6$  Hz, 2H), 7.39 (d,  $J = 8.6$  Hz, 2H), 5.93 – 5.73 (m, 2H), 5.54 (t,  $J = 2.4$  Hz, 1H), 5.27 (q,  $J = 1.6$  Hz, 1H), 5.24 (d,  $J = 1.7$  Hz, 1H), 5.19 (q,  $J = 1.5$  Hz, 1H), 5.17 (t,  $J = 1.5$  Hz, 1H), 4.50 (ddd,  $J = 15.0, 8.4, 2.7$  Hz, 1H), 3.36 (ddt,  $J = 14.6, 5.5, 1.6$  Hz, 2H), 3.28 (ddd,  $J = 14.6, 7.0, 1.6$  Hz, 2H).

**$^{19}\text{F}$  NMR (471 MHz, Chloroform-*d*)**  $\delta$  -63.0 (d,  $J = 150.3$  Hz), -80.4 (d,  $J = 150.3$  Hz).

**$^{13}\text{C}$  NMR (126 MHz, Chloroform-*d*)**  $\delta$  153.0 (d,  $J = 3.6$  Hz), 136.1, 135.8, 131.2 (dd,  $J = 273.9, 272.1$  Hz), 128.9, 126.8, 126.6, 117.4, 99.0 (d,  $J = 3.5$  Hz), 67.1 (dd,  $J = 34.6, 19.4$  Hz), 53.3 (d,  $J = 2.7$  Hz).

**HRMS (ESI)  $m/z$ :**  $[\text{M}+\text{H}]^+$  Calcd. for  $\text{C}_{16}\text{H}_{17}\text{ClF}_2\text{NO}^+$  312.0961; Found: 312.0960

#### **N,N-diallyl-5-(4-bromophenyl)-2,2-difluoro-2,3-dihydrofuran-3-amine (5ae)**

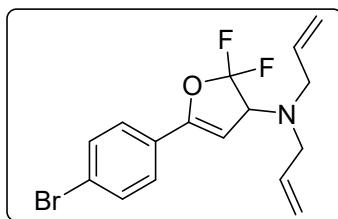

Following the experimental procedures (Condition A) on 0.2 mmol scale, brown oil, yield: 82% (53.8 mg), column chromatography (silica gel, PE: EA = 15:1, v/v).

**<sup>1</sup>H NMR (500 MHz, Chloroform-*d*)**  $\delta$  7.55 – 7.49 (m, 2H), 7.48 – 7.40 (m, 2H), 5.86 – 5.75 (m, 2H), 5.53 (t,  $J$  = 2.4 Hz, 1H), 5.23 (dq,  $J$  = 17.2, 1.6 Hz, 2H), 5.15 (dq,  $J$  = 10.2, 1.5 Hz, 2H), 4.47 (ddd,  $J$  = 15.1, 8.4, 2.7 Hz, 1H), 3.34 (ddt,  $J$  = 14.6, 5.5, 1.7 Hz, 2H), 3.26 (ddd,  $J$  = 14.6, 6.9, 1.6 Hz, 2H).

**<sup>19</sup>F NMR (471 MHz, Chloroform-*d*)**  $\delta$  -63.0 (d,  $J$  = 150.7 Hz), -80.3 (d,  $J$  = 150.1 Hz).

**<sup>13</sup>C NMR (126 MHz, Chloroform-*d*)**  $\delta$  153.1 (d,  $J$  = 3.6 Hz), 136.1, 131.8, 131.2 (dd,  $J$  = 273.9, 272.1 Hz), 127.2, 126.8, 124.1, 117.4, 99.1 (d,  $J$  = 3.6 Hz), 67.1 (dd,  $J$  = 34.7, 19.4 Hz), 53.3.

**HRMS (ESI) m/z:** [M+H]<sup>+</sup> Calcd. for C<sub>16</sub>H<sub>17</sub>BrF<sub>2</sub>NO<sup>+</sup> 356.0456; Found: 356.0454

#### N, N-diallyl-2,2-difluoro-5-(4-iodophenyl)-2,3-dihydrofuran-3-amine (5af)

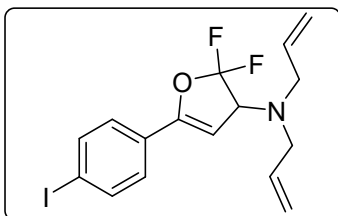

Following the experimental procedures (Condition A) on 0.2 mmol scale, brown solid (mp: 51 – 53 °C), yield: 94% (75.9 mg), column chromatography (silica gel, PE: EA = 15:1, v/v).

**<sup>1</sup>H NMR (500 MHz, Chloroform-*d*)** <sup>1</sup>H NMR (500 MHz, Chloroform-*d*)  $\delta$  7.73 (d,  $J$  = 8.5 Hz, 2H), 7.31 (d,  $J$  = 8.5 Hz, 2H), 5.87 – 5.74 (m, 2H), 5.54 (t,  $J$  = 2.4 Hz, 1H), 5.24 (q,  $J$  = 1.7 Hz, 1H), 5.21 (q,  $J$  = 1.7 Hz, 1H), 5.16 (q,  $J$  = 1.4 Hz, 1H), 5.14 (q,  $J$  = 1.5 Hz, 1H), 4.46 (ddd,  $J$  = 15.1, 8.4, 2.8 Hz, 1H), 3.33 (ddt,  $J$  = 14.6, 5.6, 1.6 Hz, 2H), 3.25 (ddd,  $J$  = 14.7, 7.0, 1.6 Hz, 2H).

**<sup>19</sup>F NMR (471 MHz, Chloroform-*d*)**  $\delta$  -63.0 (d,  $J$  = 150.2 Hz), -80.4 (d,  $J$  = 150.1 Hz).

**<sup>13</sup>C NMR (126 MHz, Chloroform-*d*)**  $\delta$  153.2 (d,  $J$  = 3.6 Hz), 137.8, 136.1, 131.2 (dd,  $J$  = 273.9, 272.1 Hz), 127.8, 126.8, 117.4, 99.3 (d,  $J$  = 3.6 Hz), 95.9, 67.1 (dd,  $J$  = 34.5, 19.5 Hz), 53.3 (d,  $J$  = 2.7 Hz).

**HRMS (ESI) m/z:** [M+H]<sup>+</sup> Calcd. for C<sub>16</sub>H<sub>17</sub>F<sub>2</sub>INO<sup>+</sup> 404.0317; Found: 404.0312

#### N, N-diallyl-2,2-difluoro-5-(4-(trifluoromethyl)phenyl)-2,3-dihydrofuran-3-amine (5ag)

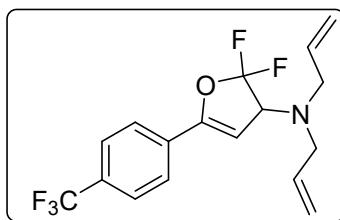

Following the experimental procedures (Condition A) on 0.2 mmol scale, brown oil, yield: 90% (62.2 mg), column chromatography (silica gel, PE: EA = 15:1, v/v).

**<sup>1</sup>H NMR (500 MHz, Chloroform-*d*)**  $\delta$  7.73 – 7.61 (m, 4H), 5.81 (ddt,  $J$  = 16.9, 10.0, 6.2 Hz, 2H), 5.66 (t,  $J$  = 2.3 Hz, 1H), 5.24 (dq,  $J$  = 17.2, 1.7 Hz, 2H), 5.16 (dt,  $J$  = 10.2, 1.5 Hz, 2H), 4.51 (ddd,  $J$  = 15.0, 8.5, 2.8 Hz, 1H), 3.34 (ddt,  $J$  = 14.5, 5.5, 1.6 Hz, 2H), 3.27 (ddd,  $J$  = 14.8, 7.0, 1.6 Hz, 2H).

**<sup>19</sup>F NMR (471 MHz, Chloroform-*d*)**  $\delta$  -62.9, -63.1 (d,  $J$  = 150.1 Hz), -80.3 (d,  $J$  = 150.5 Hz).

**<sup>13</sup>C NMR (126 MHz, Chloroform-*d*)**  $\delta$  152.7 (d,  $J$  = 3.6 Hz), 136.0, 131.6 (q,  $J$  = 33.0 Hz), 131.6, 131.1 (dd,  $J$  = 274.2, 272.3 Hz), 125.6 (d,  $J$  = 3.9 Hz), 125.6, 123.8 (q,  $J$  = 273.4 Hz), 117.5, 100.9 (d,  $J$  = 3.6 Hz), 67.0 (dd,  $J$  = 34.6, 19.5 Hz), 53.4 (d,  $J$  = 2.6 Hz).

**HRMS (ESI) *m/z***: [M+H]<sup>+</sup> Calcd. for C<sub>17</sub>H<sub>17</sub>F<sub>5</sub>NO<sup>+</sup> 346.1225; Found: 346.1223

**N,N-diallyl-2,2-difluoro-5-(2-(trifluoromethyl)phenyl)-2,3-dihydrofuran-3-amine (5ah)**

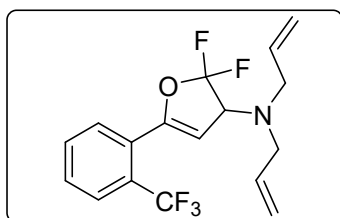

Following the experimental procedures (Condition A) on 0.2 mmol scale, brown oil, yield: 52% (36.0 mg), column chromatography (silica gel, PE: EA = 15:1, v/v).

**<sup>1</sup>H NMR (500 MHz, Chloroform-*d*)**  $\delta$  7.74 (dd,  $J$  = 7.9, 1.3 Hz, 1H), 7.64 (dd,  $J$  = 7.8, 1.4 Hz, 1H), 7.59 (td,  $J$  = 7.6, 1.4 Hz, 1H), 7.52 (t,  $J$  = 7.6 Hz, 1H), 5.83 (dddd,  $J$  = 16.9, 10.0, 6.9, 5.7 Hz, 2H), 5.47 (t,  $J$  = 2.3 Hz, 1H), 5.27 (q,  $J$  = 1.7 Hz, 1H), 5.23 (q,  $J$  = 1.7 Hz, 1H), 5.18 (q,  $J$  = 1.4 Hz, 1H), 5.16 (t,  $J$  = 1.5 Hz, 1H), 4.49 (ddd,  $J$  = 15.6, 8.7, 2.7 Hz, 1H), 3.37 (ddt,  $J$  = 14.6, 5.6, 1.7 Hz, 2H), 3.29 (ddd,  $J$  = 14.6, 7.1, 1.6 Hz, 2H).

**<sup>19</sup>F NMR (471 MHz, Chloroform-*d*)**  $\delta$  -59.2, -63.7 (d,  $J$  = 151.3 Hz), -81.0 (d,  $J$  = 150.7 Hz).

$^{13}\text{C}$  NMR (126 MHz, Chloroform-*d*)  $\delta$  151.4 (d,  $J = 3.9$  Hz), 136.1, 131.8, 130.9 (dd,  $J = 274.2, 272.3$  Hz), 130.54, 129.91, 128.4 (q,  $J = 31.5$  Hz), 127.77, 126.6 (q,  $J = 5.6$  Hz), 124.5 (q,  $J = 273.4$  Hz), 117.5, 104.8, 67.2 (dd,  $J = 34.7, 19.3$  Hz), 53.3 (d,  $J = 2.7$  Hz).

HRMS (ESI)  $m/z$ :  $[\text{M}+\text{H}]^+$  Calcd. for  $\text{C}_{17}\text{H}_{17}\text{F}_5\text{NO}^+$  346.1225; Found: 346.1225

#### 4-(4-(diallylamino)-5,5-difluoro-4,5-dihydrofuran-2-yl)benzonitrile (5ai)

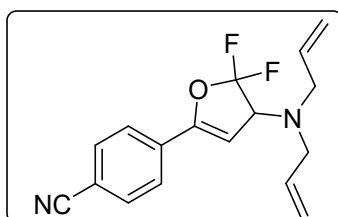

Following the experimental procedures (Condition A) on 0.2 mmol scale, brown oil, yield: 84% (50.9 mg), column chromatography (silica gel, PE: EA = 15:1, v/v).

$^1\text{H}$  NMR (500 MHz, Chloroform-*d*)  $\delta$  7.68 (s, 4H), 5.86 – 5.75 (m, 2H), 5.70 (dd,  $J = 2.8, 1.9$  Hz, 1H), 5.27 – 5.13 (m, 4H), 4.51 (ddd,  $J = 15.0, 8.6, 2.8$  Hz, 1H), 3.32 (ddt,  $J = 14.6, 5.7, 1.6$  Hz, 2H), 3.26 (ddd,  $J = 14.6, 7.0, 1.6$  Hz, 2H).

$^{19}\text{F}$  NMR (471 MHz, Chloroform-*d*)  $\delta$  -63.1 (d,  $J = 150.0$  Hz), -80.1 (d,  $J = 150.2$  Hz).

$^{13}\text{C}$  NMR (126 MHz, Chloroform-*d*)  $\delta$  152.2 (d,  $J = 3.6$  Hz), 135.9, 132.4, 132.2, 131.0 (dd,  $J = 274.7, 272.5$  Hz), 125.8, 118.3, 117.6, 113.2, 102.3 (d,  $J = 3.7$  Hz), 67.1 (dd,  $J = 34.6, 19.5$  Hz), 53.4 (d,  $J = 2.6$  Hz).

HRMS (ESI)  $m/z$ :  $[\text{M}+\text{H}]^+$  Calcd. for  $\text{C}_{17}\text{H}_{17}\text{F}_2\text{N}_2\text{O}^+$  303.1303; Found: 303.1305

#### N, N-diallyl-2,2-difluoro-5-(4-methoxyphenyl)-2,3-dihydrofuran-3-amine (5aj)

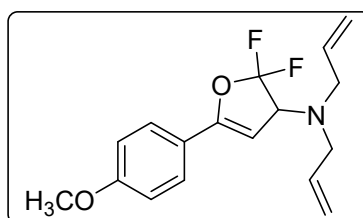

Following the experimental procedures (Condition A) on 0.2 mmol scale, brown oil, yield: 93% (57.3 mg), column chromatography (silica gel, PE: EA = 15:1, v/v).

$^1\text{H}$  NMR (500 MHz, Chloroform-*d*)  $\delta$  7.53 (d,  $J = 8.9$  Hz, 2H), 6.91 (d,  $J = 8.9$  Hz, 2H), 5.88 – 5.76 (m, 2H), 5.37 (t,  $J = 2.4$  Hz, 1H), 5.24 (dq,  $J = 17.2, 1.7$  Hz, 2H), 5.15 (dq,  $J = 10.1, 1.5$  Hz, 2H), 4.47

(ddd,  $J = 15.1, 8.0, 2.7$  Hz, 1H), 3.83 (s, 3H), 3.36 (ddt,  $J = 14.5, 5.6, 1.6$  Hz, 2H), 3.26 (ddd,  $J = 14.6, 7.0, 1.7$  Hz, 2H).

$^{19}\text{F}$  NMR (471 MHz, Chloroform-*d*)  $\delta$  -62.81 (d,  $J = 150.6$  Hz), -80.65 (d,  $J = 150.8$  Hz).

$^{13}\text{C}$  NMR (126 MHz, Chloroform-*d*)  $^{13}\text{C}$  NMR (126 MHz, Chloroform-*d*)  $\delta$  160.86, 153.98 (d,  $J = 3.5$  Hz), 136.34, 134.24 – 128.70 (m), 126.84, 121.03, 117.26, 113.99, 96.15 (d,  $J = 3.4$  Hz), 67.11 (dd,  $J = 34.6, 19.3$  Hz), 55.34, 53.27 (d,  $J = 2.7$  Hz).

HRMS (ESI)  $m/z$ :  $[\text{M}+\text{H}]^+$  Calcd. for  $\text{C}_{17}\text{H}_{20}\text{F}_2\text{NO}_2^+$  308.1457; Found: 308.1465

#### N,N-diallyl-2,2-difluoro-5-(naphthalen-2-yl)-2,3-dihydrofuran-3-amine (5ak)

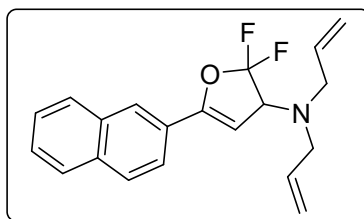

Following the experimental procedures (Condition A) on 0.2 mmol scale, brown oil, yield: 75% (49.2 mg), column chromatography (silica gel, PE: EA = 15:1, v/v).

$^1\text{H}$  NMR (500 MHz, Chloroform-*d*)  $\delta$  7.69 – 7.66 (m, 1H), 7.44 – 7.37 (m, 5H), 7.35 – 7.29 (m, 3H), 5.68 (ddt,  $J = 16.6, 10.1, 6.3$  Hz, 2H), 5.20 – 5.03 (m, 4H), 4.47 (t,  $J = 2.3$  Hz, 1H), 4.22 (ddd,  $J = 15.4, 8.6, 2.7$  Hz, 1H), 3.23 – 3.05 (m, 4H).

$^{19}\text{F}$  NMR (471 MHz, Chloroform-*d*)  $\delta$  -63.5 (d,  $J = 151.0$  Hz), -81.1 (d,  $J = 150.9$  Hz).

$^{13}\text{C}$  NMR (126 MHz, Chloroform-*d*)  $\delta$  153.0 (d,  $J = 3.6$  Hz), 141.4 (d,  $J = 29.9$  Hz), 136.1, 130.8 (dd,  $J = 274.7, 272.5$  Hz), 130.7, 129.4, 129.1, 128.8, 128.5, 127.9, 127.5, 127.5, 127.2, 117.4, 103.7 (d,  $J = 3.4$  Hz), 67.2 (dd,  $J = 34.7, 19.2$  Hz), 53.2 (d,  $J = 2.7$  Hz).

HRMS (ESI)  $m/z$ :  $[\text{M}+\text{H}]^+$  Calcd. for  $\text{C}_{20}\text{H}_{20}\text{F}_2\text{NO}^+$  328.1507; Found: 328.1503

#### N,N-diallyl-2,2-difluoro-5-(pyren-4-yl)-2,3-dihydrofuran-3-amine (5al)

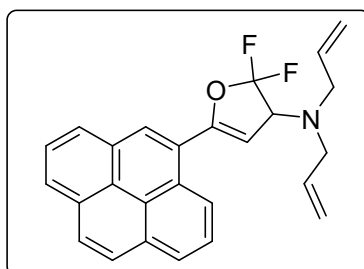

Following the experimental procedures (Condition A) on 0.2 mmol scale, white solid (mp: 56 – 58 °C), yield: 62% (49.8 mg), column chromatography (silica gel, PE: EA = 15:1, v/v).

**<sup>1</sup>H NMR (500 MHz, Chloroform-*d*)**  $\delta$  8.47 (d,  $J$  = 9.3 Hz, 1H), 8.15 (d,  $J$  = 7.6 Hz, 2H), 8.12 – 8.02 (m, 4H), 7.99 – 7.95 (m, 2H), 5.86 (ddt,  $J$  = 16.7, 10.1, 6.2 Hz, 2H), 5.60 (t,  $J$  = 2.3 Hz, 1H), 5.27 (dq,  $J$  = 17.1, 1.7 Hz, 2H), 5.17 (dq,  $J$  = 10.2, 1.4 Hz, 2H), 4.62 (ddd,  $J$  = 15.3, 8.2, 2.6 Hz, 1H), 3.47 (ddt,  $J$  = 14.4, 5.6, 1.6 Hz, 2H), 3.37 (ddd,  $J$  = 14.6, 7.0, 1.6 Hz, 2H).

**<sup>19</sup>F NMR (471 MHz, Chloroform-*d*)**  $\delta$  -62.9 (d,  $J$  = 150.8 Hz), -80.8 (d,  $J$  = 150.9 Hz).

**<sup>13</sup>C NMR (126 MHz, Chloroform-*d*)**  $\delta$  154.7 (d,  $J$  = 3.3 Hz), 136.3, 132.4, 131.3 (dd,  $J$  = 274.7, 272.5 Hz), 131.2, 130.6, 128.7, 128.6, 128.6, 127.2, 126.3, 126.1, 125.9, 125.7, 124.8, 124.5, 124.5, 124.1, 123.2, 117.5, 104.2 (d,  $J$  = 3.2 Hz), 67.3 (dd,  $J$  = 34.7, 19.2 Hz), 53.5, 27.0.

**HRMS (ESI) m/z:** [M+H]<sup>+</sup> Calcd. for C<sub>26</sub>H<sub>22</sub>F<sub>2</sub>NO<sup>+</sup> 402.1664; Found: 402.1664

#### N, N-diallyl-5-(9H-fluoren-2-yl)-2,2-difluoro-2,3-dihydrofuran-3-amine (5am)

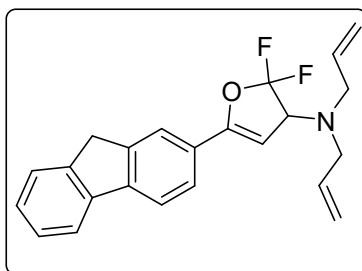

Following the experimental procedures (Condition A) on 0.2 mmol scale, colorless oil, yield: 67% (49.0 mg), column chromatography (silica gel, PE: EA = 15:1, v/v).

**<sup>1</sup>H NMR (500 MHz, Chloroform-*d*)**  $\delta$  7.84 – 7.70 (m, 3H), 7.65 – 7.52 (m, 2H), 7.38 (dtd,  $J$  = 28.2, 7.4, 1.2 Hz, 2H), 5.86 (ddt,  $J$  = 16.7, 10.0, 6.2 Hz, 2H), 5.56 (t,  $J$  = 2.3 Hz, 1H), 5.27 (dq,  $J$  = 17.0, 1.7 Hz, 2H), 5.18 (dq,  $J$  = 10.1, 1.5 Hz, 2H), 4.53 (ddd,  $J$  = 15.0, 8.2, 2.7 Hz, 1H), 3.92 (s, 2H), 3.40 (ddt,  $J$  = 14.5, 5.5, 1.7 Hz, 2H), 3.31 (ddd,  $J$  = 14.9, 7.1, 1.8 Hz, 2H).

**<sup>19</sup>F NMR (471 MHz, Chloroform-*d*)**  $\delta$  -62.9 (d,  $J$  = 150.5 Hz), -80.5 (d,  $J$  = 150.5 Hz).

**<sup>13</sup>C NMR (126 MHz, Chloroform-*d*)**  $\delta$  154.5 (d,  $J$  = 3.4 Hz), 143.8, 143.5, 143.4, 140.9, 136.3, 131.4 (dd,  $J$  = 274.7, 272.5 Hz), 127.4, 127.0, 126.6, 125.2, 124.3, 121.9, 120.3, 119.9, 117.4, 97.9 (d,  $J$  = 3.5 Hz), 67.1 (dd,  $J$  = 34.6, 19.4 Hz), 53.3, 36.9.

**HRMS (ESI) m/z:** [M+H]<sup>+</sup> Calcd. for C<sub>23</sub>H<sub>22</sub>F<sub>2</sub>NO<sup>+</sup> 366.1664; Found: 366.1660

**N,N-diallyl-5-(4-bromo-2-fluorophenyl)-2,2-difluoro-2,3-dihydrofuran-3-amine (5an)**

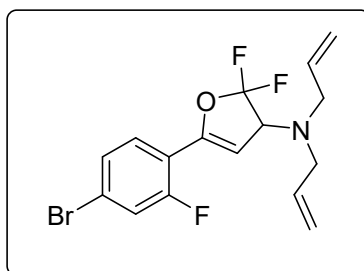

Following the experimental procedures (Condition A) on 0.2 mmol scale, brown oil, yield: 71% (53.1 mg), column chromatography (silica gel, PE: EA = 15:1, v/v).

**<sup>1</sup>H NMR (500 MHz, Chloroform-*d*)**  $\delta$  7.50 (t,  $J$  = 8.2 Hz, 1H), 7.37 – 7.28 (m, 2H), 5.87 – 5.74 (m, 3H), 5.25 (d,  $J$  = 1.7 Hz, 1H), 5.21 (d,  $J$  = 1.7 Hz, 1H), 5.16 (d,  $J$  = 1.6 Hz, 1H), 5.14 (d,  $J$  = 1.6 Hz, 1H), 4.48 (ddd,  $J$  = 15.3, 8.6, 2.8 Hz, 1H), 3.43 – 3.15 (m, 4H).

**<sup>19</sup>F NMR (471 MHz, Chloroform-*d*)**  $\delta$  -64.0 (d,  $J$  = 150.5 Hz), -81.3 (d,  $J$  = 150.3 Hz), -109.0.

**<sup>13</sup>C NMR (126 MHz, Chloroform-*d*)**  $\delta$  160.1 (d,  $J$  = 258.4 Hz), 147.3, 136.0, 133.0 (dd,  $J$  = 274.7, 272.5 Hz), 128.4 (d,  $J$  = 3.0 Hz), 127.8 (d,  $J$  = 3.6 Hz), 123.7 (d,  $J$  = 9.9 Hz), 119.7, 119.5, 117.6, 115.8 (d,  $J$  = 11.0 Hz), 105.1 (dd,  $J$  = 13.5, 3.6 Hz), 67.2 (dd,  $J$  = 34.6, 19.3 Hz), 53.4 (d,  $J$  = 2.6 Hz).

**HRMS (ESI) m/z:** [M+H]<sup>+</sup> Calcd. for C<sub>16</sub>H<sub>16</sub>BrF<sub>3</sub>NO<sup>+</sup> 374.0362; Found: 374.0368

**N,N-diallyl-2,2-difluoro-5-(2-fluoro-4-methylphenyl)-2,3-dihydrofuran-3-amine (5ao)**

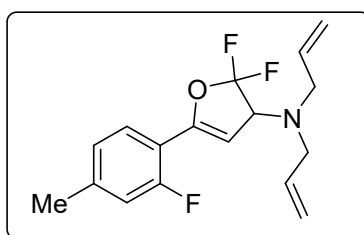

Following the experimental procedures (Condition A) on 0.2 mmol scale, brown oil, yield: 64% (39.7 mg), column chromatography (silica gel, PE: EA = 15:1, v/v).

**<sup>1</sup>H NMR (500 MHz, Chloroform-*d*)**  $\delta$  7.50 (t,  $J$  = 7.9 Hz, 1H), 7.04 – 6.90 (m, 2H), 5.90 – 5.74 (m, 2H), 5.69 (q,  $J$  = 2.7 Hz, 1H), 5.26 – 5.19 (m, 2H), 5.18 – 5.11 (m, 2H), 4.49 (ddd,  $J$  = 15.2, 8.5, 2.8 Hz, 1H), 3.34 (ddt,  $J$  = 14.5, 5.7, 1.6 Hz, 2H), 3.26 (ddd,  $J$  = 14.6, 6.9, 1.6 Hz, 2H), 2.37 (s, 3H).

**<sup>19</sup>F NMR (471 MHz, Chloroform-*d*)**  $\delta$  -63.8 (d,  $J$  = 150.9 Hz), -81.5 (d,  $J$  = 150.9 Hz), -112.3.

**<sup>13</sup>C NMR (126 MHz, Chloroform-*d*)**  $\delta$  160.4 (d,  $J$  = 253.4 Hz), 148.3 (d,  $J$  = 3.7 Hz), 142.0 (d,  $J$  = 8.6 Hz), 136.2, 130.6 (dd,  $J$  = 274.7, 272.5 Hz), 127.2 (d,  $J$  = 2.8 Hz), 125.0 (d,  $J$  = 3.0 Hz), 117.4, 116.4



(d,  $J = 21.3$  Hz), 113.8 (d,  $J = 11.4$  Hz), 103.3 (dd,  $J = 13.4, 3.5$  Hz), 67.2 (dd,  $J = 34.5, 19.2$  Hz), 53.3 (d,  $J = 2.6$  Hz), 21.3 (d,  $J = 1.7$  Hz).

**HRMS (ESI) m/z:**  $[M+H]^+$  Calcd. for  $C_{17}H_{19}F_3NO^+$  310.1413; Found: 310.1416

**N,N-diallyl-2,2-difluoro-5-(3-fluoro-4-methoxyphenyl)-2,3-dihydrofuran-3-amine (5ap)**

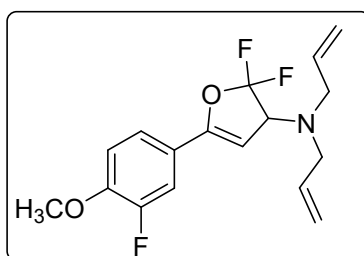

Following the experimental procedures (Condition A) on 0.2 mmol scale, brown oil, yield: 82% (53.4 mg), column chromatography (silica gel, PE: EA = 15:1, v/v).

**$^1H$  NMR (500 MHz, Chloroform-*d*)**  $\delta$  7.53 (t,  $J = 8.7$  Hz, 1H), 6.75 – 6.63 (m, 2H), 5.88 – 5.73 (m, 2H), 5.60 (q,  $J = 2.7$  Hz, 1H), 5.27 – 5.10 (m, 4H), 4.48 (ddd,  $J = 15.2, 8.3, 2.7$  Hz, 1H), 3.82 (s, 3H), 3.34 (ddt,  $J = 14.6, 5.6, 1.6$  Hz, 2H), 3.29 – 3.22 (m, 2H).

**$^{19}F$  NMR (471 MHz, Chloroform-*d*)**  $\delta$  -68.6 (d,  $J = 150.9$  Hz), -86.4 (d,  $J = 150.8$  Hz), -113.8.

**$^{13}C$  NMR (126 MHz, Chloroform-*d*)**  $\delta$  161.7 (d,  $J = 11.6$  Hz), 161.5 (d,  $J = 253.5$  Hz), 148.2, 148.2 (d,  $J = 7.8$  Hz), 136.3, 130.6 (dd,  $J = 274.7, 272.5$  Hz), 128.2 (d,  $J = 4.3$  Hz), 117.4 (d,  $J = 4.9$  Hz), 109.7 (d,  $J = 2.8$  Hz), 109.4 (d,  $J = 11.6$  Hz), 102.3 (d,  $J = 25.0$  Hz), 101.7 (dd,  $J = 12.9, 3.4$  Hz), 67.2 (dd,  $J = 34.6, 19.3$  Hz), 55.7, 53.3 (d,  $J = 2.6$  Hz).

**HRMS (ESI) m/z:**  $[M+H]^+$  Calcd. for  $C_{17}H_{19}F_3NO_2^+$  326.1362; Found: 326.1369

**N,N-dibenzyl-2,2-difluoro-5-phenethyl-2,3-dihydrofuran-3-amine (5aq)**

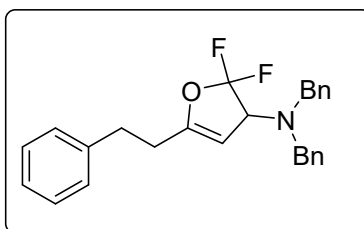

Following the experimental procedures (Condition A) on 0.2 mmol scale, colorless oil, yield: 71% (57.5mg), column chromatography (silica gel, PE: EA = 20:1, v/v).

**$^1H$  NMR (500 MHz, Chloroform-*d*)**  $\delta$  7.40 – 7.34 (m, 8H), 7.29 (tdd,  $J = 7.3, 4.9, 2.3$  Hz, 4H), 7.24 – 7.16 (m, 3H), 4.82 (qd,  $J = 2.2, 1.2$  Hz, 1H), 4.25 – 4.13 (m, 1H), 3.82 – 3.70 (m, 4H), 2.88 (t,  $J = 7.6$

Hz, 2H), 2.57 (tt,  $J = 7.3, 1.5$  Hz, 2H).

$^{19}\text{F}$  NMR (471 MHz, Chloroform-*d*)  $\delta$  -62.2 (d,  $J = 150.8$  Hz), -80.8 (d,  $J = 150.8$  Hz).

$^{13}\text{C}$  NMR (126 MHz, Chloroform-*d*)  $\delta$  157.0 (d,  $J = 2.9$  Hz), 140.2, 139.5, 131.8 (dd,  $J = 274.7, 272.5$  Hz), 128.7, 128.5, 128.4, 128.3, 127.1, 126.34, 99.7 (d,  $J = 3.5$  Hz), 65.7 (dd,  $J = 34.5, 19.0$  Hz), 54.2, 31.8, 29.9.

HRMS (ESI)  $m/z$ :  $[\text{M}+\text{H}]^+$  Calcd. for  $\text{C}_{26}\text{H}_{26}\text{F}_2\text{NO}^+$  406.1982; Found: 406.1986

#### methyl 4-phenyl-2-(piperidin-1-yl) butanoate (6a)

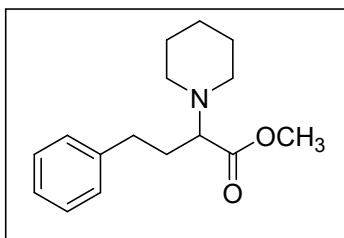

Following the experimental procedures (Condition A) on 0.2 mmol scale, colorless oil, yield: 75% (39.3 mg), column chromatography (silica gel, PE: EA = 10:1, v/v).

$^1\text{H}$  NMR (500 MHz, Chloroform-*d*)  $\delta$  7.33 – 7.28 (m, 2H), 7.22 (d,  $J = 7.6$  Hz, 3H), 3.71 (s, 3H), 3.17 (t,  $J = 7.5$  Hz, 1H), 2.66 (dtd,  $J = 19.6, 10.6, 9.1, 4.9$  Hz, 4H), 2.48 (ddd,  $J = 11.2, 7.1, 3.4$  Hz, 2H), 2.09 – 1.98 (m, 2H), 1.59 (ddqd,  $J = 25.2, 12.7, 6.4, 3.7$  Hz, 4H), 1.47 (p,  $J = 5.9$  Hz, 2H).

$^{13}\text{C}$  NMR (126 MHz, Chloroform-*d*)  $\delta$  172.8, 141.7, 128.6, 128.3, 125.9, 67.2, 50.9, 50.7, 32.3, 31.0, 26.6, 24.7.

HRMS (ESI)  $m/z$ :  $[\text{M}+\text{H}]^+$  Calcd. for  $\text{C}_{16}\text{H}_{24}\text{NO}_2^+$  262.1802; Found: 262.1805

#### methyl 2-morpholino-4-phenylbutanoate (6b)

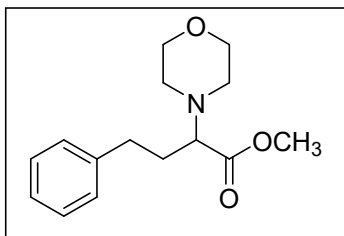

Following the experimental procedures (Condition A) on 0.2 mmol scale, colorless oil, yield: 73% (38.6 mg), column chromatography (silica gel, PE: EA = 10:1, v/v).

$^1\text{H}$  NMR (500 MHz, Chloroform-*d*)  $\delta$  7.32 – 7.28 (m, 2H), 7.24 – 7.17 (m, 3H), 3.78 – 3.65 (m, 7H), 3.17 (t,  $J = 7.6$  Hz, 1H), 2.72 – 2.64 (m, 4H), 2.60 – 2.52 (m, 2H), 2.08 – 1.98 (m, 2H).

$^{13}\text{C}$  NMR (126 MHz, Chloroform-*d*)  $\delta$  172.2, 141.4, 128.5, 128.4, 126.0, 67.4, 66.7, 51.1, 49.9, 32.1, 30.5.

HRMS (ESI)  $m/z$ :  $[\text{M}+\text{H}]^+$  Calcd. for  $\text{C}_{15}\text{H}_{22}\text{NO}_3^+$  264.1594; Found: 264.1591

**methyl 4-phenyl-2-(1,4-dioxo-8-azaspiro[4.5]decan-8-yl)butanoate (6c)**

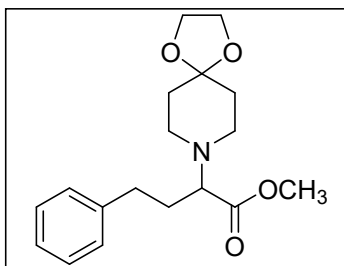

Following the experimental procedures (Condition A) on 0.2 mmol scale, colorless oil, yield: 83% (53.2 mg), column chromatography (silica gel, PE: EA = 10:1, v/v).

$^1\text{H}$  NMR (500 MHz, Chloroform-*d*)  $\delta$  7.29 – 7.23 (m, 2H), 7.20 – 7.15 (m, 3H), 3.93 (s, 4H), 3.68 (s, 3H), 3.19 (t,  $J = 7.5$  Hz, 1H), 2.74 (dddd,  $J = 11.5, 7.5, 3.9, 1.2$  Hz, 2H), 2.65 (td,  $J = 7.6, 2.2$  Hz, 2H), 2.60 – 2.53 (m, 2H), 2.07 – 1.94 (m, 2H), 1.80 – 1.65 (m, 4H).

$^{13}\text{C}$  NMR (126 MHz, Chloroform-*d*)  $\delta$  172.5, 141.5, 128.5, 128.4, 125.9, 107.3, 66.2, 64.2, 51.1, 35.5, 32.3, 31.0.

HRMS (ESI)  $m/z$ :  $[\text{M}+\text{H}]^+$  Calcd. for  $\text{C}_{18}\text{H}_{26}\text{NO}_4^+$  320.1856; Found: 320.1855

**methyl 4-phenyl-2-(piperidin-1-yl) butanoate (6d)**

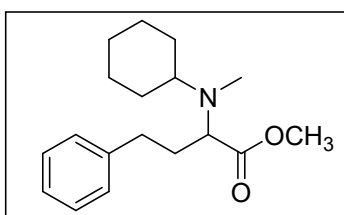

Following the experimental procedures (Condition A) on 0.2 mmol scale, colorless oil, yield: 75% (43.5 mg), column chromatography (silica gel, PE: EA = 10:1, v/v).

$^1\text{H}$  NMR (500 MHz, Chloroform-*d*)  $\delta$  7.32 (q,  $J = 7.7$  Hz, 2H), 7.22 (q,  $J = 8.6, 7.9$  Hz, 3H), 3.71 (d,  $J = 7.6$  Hz, 3H), 3.45 (q,  $J = 7.3$  Hz, 1H), 2.76 – 2.58 (m, 2H), 2.52 (ddt,  $J = 14.7, 11.3, 5.6$  Hz, 1H), 2.41 (d,  $J = 7.1$  Hz, 3H), 2.11 – 1.95 (m, 2H), 1.86 – 1.72 (m, 4H), 1.63 (td,  $J = 8.0, 4.0$  Hz, 1H), 1.34 – 1.18 (m, 4H), 1.12 (ddt,  $J = 16.5, 7.9, 4.2$  Hz, 1H).

$^{13}\text{C}$  NMR (126 MHz, Chloroform-*d*)  $\delta$  174.5, 141.8, 128.5, 128.3, 125.9, 62.4, 61.3, 51.1, 32.7, 32.5, 31.9, 30.7, 30.3, 26.2, 26.0, 25.9.

HRMS (ESI)  $m/z$ :  $[\text{M}+\text{H}]^+$  Calcd. for  $\text{C}_{18}\text{H}_{28}\text{NO}_2^+$  290.2115; Found: 290.2113

**methyl 2-((2,2-dimethoxyethyl)(methyl)amino)-4-phenylbutanoate (6e)**

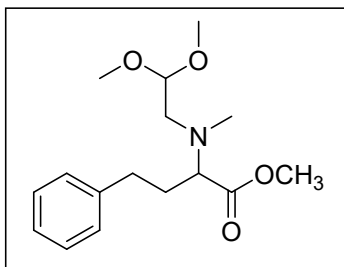

Following the experimental procedures (Condition A) on 0.2 mmol scale, colorless oil, yield: 79% (46.9 mg), column chromatography (silica gel, PE: EA = 10:1, v/v).

$^1\text{H}$  NMR (500 MHz, Chloroform-*d*)  $\delta$  7.30 – 7.25 (m, 2H), 7.22 – 7.16 (m, 3H), 4.42 (t,  $J$  = 5.2 Hz, 1H), 3.68 (s, 3H), 3.36 (d,  $J$  = 4.5 Hz, 6H), 3.28 (dd,  $J$  = 8.1, 6.9 Hz, 1H), 2.83 – 2.71 (m, 2H), 2.65 (ddd,  $J$  = 11.8, 8.4, 5.9 Hz, 2H), 2.42 (s, 3H), 2.08 – 1.90 (m, 2H).

$^{13}\text{C}$  NMR (126 MHz, Chloroform-*d*)  $\delta$  173.2, 141.7, 128.6, 128.4, 125.9, 103.75, 66.1, 55.8, 53.8, 53.6, 51.0, 39.4, 32.4, 31.6.

HRMS (ESI)  $m/z$ :  $[\text{M}+\text{H}]^+$  Calcd. for  $\text{C}_{16}\text{H}_{26}\text{NO}_4^+$  296.1856; Found: 296.1862

**methyl 2-(diethylamino)-4-phenylbutanoate (6f)**

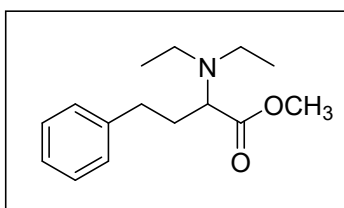

Following the experimental procedures (Condition A) on 0.2 mmol scale, colorless oil, yield: 67% (33.4 mg), column chromatography (silica gel, PE: EA = 10:1, v/v).

$^1\text{H}$  NMR (500 MHz, Chloroform-*d*)  $\delta$  7.33 – 7.29 (m, 2H), 7.25 – 7.19 (m, 3H), 3.71 (s, 3H), 3.41 (dd,  $J$  = 7.8, 7.0 Hz, 1H), 2.81 – 2.64 (m, 4H), 2.52 (dq,  $J$  = 13.9, 6.9 Hz, 2H), 2.08 (ddt,  $J$  = 13.7, 9.4, 6.8 Hz, 1H), 1.96 (dddd,  $J$  = 13.7, 9.5, 7.8, 5.9 Hz, 1H), 1.06 (t,  $J$  = 7.1 Hz, 6H).

$^{13}\text{C}$  NMR (126 MHz, Chloroform-*d*)  $\delta$  174.0, 141.8, 128.5, 128.3, 125.9, 62.3, 54.1, 44.6, 32.6, 31.5,

14.1.

**HRMS (ESI) m/z:** [M+H]<sup>+</sup> Calcd. for C<sub>15</sub>H<sub>24</sub>NO<sub>2</sub><sup>+</sup>250.1802; Found: 250.1799

**methyl 2-(methyl(propyl)amino)-4-phenylbutanoate (6g)**

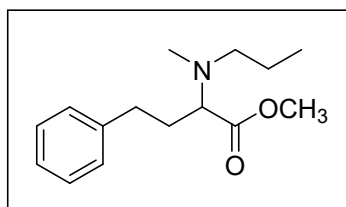

Following the experimental procedures (Condition A) on 0.2 mmol scale, colorless oil, yield: 38% (19.0 mg), column chromatography (silica gel, PE: EA = 10:1, v/v).

**<sup>1</sup>H NMR (500 MHz, Chloroform-*d*)** δ 7.33 – 7.28 (m, 2H), 7.21 (ddd, *J* = 8.0, 7.2, 1.2 Hz, 3H), 3.71 (s, 3H), 3.27 (t, *J* = 7.5 Hz, 1H), 2.69 (qdd, *J* = 13.7, 9.2, 6.4 Hz, 2H), 2.54 (ddd, *J* = 12.4, 8.9, 6.2 Hz, 1H), 2.39 (ddd, *J* = 12.4, 8.8, 5.8 Hz, 1H), 2.34 (s, 3H), 2.12 – 1.91 (m, 2H), 1.58 – 1.41 (m, 2H), 0.92 (t, *J* = 7.4 Hz, 3H).

**<sup>13</sup>C NMR (126 MHz, Chloroform-*d*)** δ 173.1, 141.7, 128.5, 128.4, 125.9, 65.6, 56.2, 50.9, 37.8, 32.4, 31.3, 21.3, 11.8.

**HRMS (ESI) m/z:** [M+H]<sup>+</sup> Calcd. for C<sub>15</sub>H<sub>24</sub>NO<sub>2</sub><sup>+</sup>250.1802; Found: 250.1803

**methyl 2-(dipropylamino)-4-phenylbutanoate (6h)**

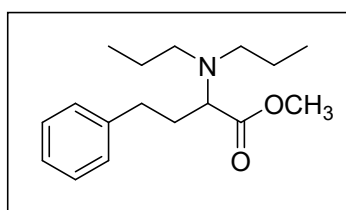

Following the experimental procedures (Condition A) on 0.2 mmol scale, colorless oil, yield: 42% (23.4 mg), column chromatography (silica gel, PE: EA = 10:1, v/v).

**<sup>1</sup>H NMR (500 MHz, Chloroform-*d*)** δ 7.34 – 7.27 (m, 2H), 7.22 (dt, *J* = 8.0, 1.8 Hz, 3H), 3.70 (s, 3H), 3.36 (dd, *J* = 8.3, 6.5 Hz, 1H), 2.80 (ddd, *J* = 13.9, 9.7, 5.7 Hz, 1H), 2.61 (dddd, *J* = 29.0, 13.1, 9.4, 6.7 Hz, 3H), 2.45 (ddd, *J* = 13.3, 8.6, 5.0 Hz, 2H), 2.06 (ddt, *J* = 13.8, 9.7, 6.5 Hz, 1H), 1.93 (dddd, *J* = 13.8, 9.8, 8.2, 5.7 Hz, 1H), 1.53 – 1.37 (m, 4H), 0.90 (t, *J* = 7.3 Hz, 6H).

**<sup>13</sup>C NMR (126 MHz, Chloroform-*d*)** δ 174.0, 142.0, 128.5, 128.3, 125.8, 62.9, 53.3, 50.9, 32.7, 31.7,

22.1, 11.8.

**HRMS (ESI) m/z:** [M+H]<sup>+</sup> Calcd. for C<sub>17</sub>H<sub>28</sub>NO<sub>2</sub><sup>+</sup> 278.2115; Found: 278.2110

**methyl 2-(butyl(phenyl)amino)-4-phenylbutanoate (6i)**

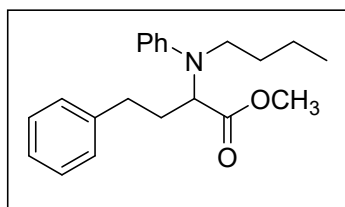

Following the experimental procedures (Condition A) on 0.2 mmol scale, colorless oil, yield: 76% (49.5 mg), column chromatography (silica gel, PE: EA = 10:1, v/v).

**<sup>1</sup>H NMR (500 MHz, Chloroform-*d*)**  $\delta$  7.37 – 7.31 (m, 2H), 7.30 – 7.18 (m, 5H), 6.87 – 6.75 (m, 3H), 4.34 (dd, *J* = 8.7, 5.9 Hz, 1H), 3.73 (s, 3H), 3.42 – 3.25 (m, 2H), 2.85 – 2.68 (m, 2H), 2.41 (ddt, *J* = 13.0, 9.3, 6.5 Hz, 1H), 2.23 (dtd, *J* = 14.4, 9.0, 5.8 Hz, 1H), 1.72 – 1.55 (m, 2H), 1.41 (q, *J* = 7.4 Hz, 2H), 1.01 (t, *J* = 7.4 Hz, 3H).

**<sup>13</sup>C NMR (126 MHz, Chloroform-*d*)**  $\delta$  173.5, 148.7, 141.2, 129.1, 128.6, 128.5, 126.1, 117.8, 114.7, 61.9, 51.8, 47.2, 32.7, 31.8, 30.4, 20.4, 14.0.

**HRMS (ESI) m/z:** [M+H]<sup>+</sup> Calcd. for C<sub>21</sub>H<sub>28</sub>NO<sub>2</sub><sup>+</sup> 326.2115; Found: 326.2109

**methyl 2-(ethyl(phenyl)amino)-4-phenylbutanoate (6j)**

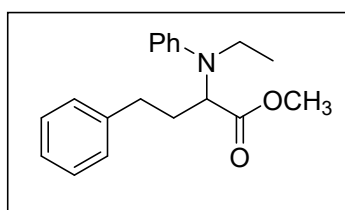

Following the experimental procedures (Condition A) on 0.2 mmol scale, colorless oil, yield: 90% (53.8 mg), column chromatography (silica gel, PE: EA = 10:1, v/v).

**<sup>1</sup>H NMR (500 MHz, Chloroform-*d*)**  $\delta$  7.37 – 7.20 (m, 7H), 6.86 – 6.77 (m, 3H), 4.37 (dd, *J* = 8.8, 6.0 Hz, 1H), 3.74 (s, 3H), 3.56 – 3.39 (m, 2H), 2.88 – 2.68 (m, 2H), 2.46 – 2.34 (m, 1H), 2.24 (dtd, *J* = 14.5, 9.0, 5.8 Hz, 1H), 1.26 (t, *J* = 7.0 Hz, 3H).

**<sup>13</sup>C NMR (126 MHz, Chloroform-*d*)**  $\delta$  173.5, 148.3, 141.2, 129.2, 128.6, 128.5, 126.2, 117.7, 114.3, 61.4, 51.9, 41.4, 32.7, 31.8, 14.0.

**HRMS (ESI) m/z:** [M+H]<sup>+</sup> Calcd. for C<sub>19</sub>H<sub>24</sub>NO<sub>2</sub><sup>+</sup> 298.1802; Found: 298.1803

**methyl 2-(diisopropylamino)-4-phenylbutanoate (6k)**

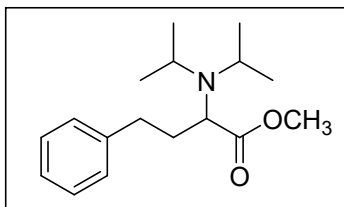

Following the experimental procedures (Condition A) on 0.2 mmol scale, colorless oil, yield: 82% (45.6 mg), column chromatography (silica gel, PE: EA = 10:1, v/v).

**<sup>1</sup>H NMR (500 MHz, Chloroform-*d*)** δ 7.34 – 7.27 (m, 2H), 7.24 – 7.19 (m, 3H), 3.70 (s, 3H), 3.48 (t, *J* = 7.4 Hz, 1H), 3.38 (hept, *J* = 6.7 Hz, 2H), 2.72 (ddd, *J* = 13.8, 10.3, 5.9 Hz, 1H), 2.59 (ddd, *J* = 13.8, 10.5, 5.5 Hz, 1H), 2.14 – 2.06 (m, 1H), 1.85 (dddd, *J* = 13.4, 10.6, 7.5, 5.9 Hz, 1H), 1.05 (dd, *J* = 6.7, 4.7 Hz, 12H).

**<sup>13</sup>C NMR (126 MHz, Chloroform-*d*)** δ 176.0, 142.1, 128.4, 128.4, 125.8, 56.6, 51.3, 45.2, 33.6, 33.1, 23.5, 21.8.

**HRMS (ESI) m/z:** [M+H]<sup>+</sup> Calcd. for C<sub>17</sub>H<sub>28</sub>NO<sub>2</sub><sup>+</sup> 278.2115; Found: 278.2116.

**tert-butyl 4-(1-methoxy-1-oxo-4-phenylbutan-2-yl) piperazine-1-carboxylate (6l)**

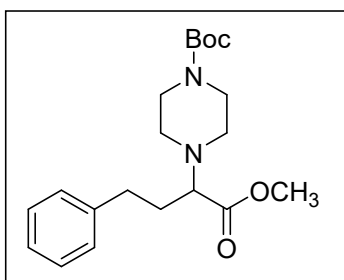

Following the experimental procedures (Condition A) on 0.2 mmol scale, colorless oil, yield: 88% (64.0 mg), column chromatography (silica gel, PE: EA = 10:1, v/v).

**<sup>1</sup>H NMR (500 MHz, Chloroform-*d*)** δ 7.28 (dd, *J* = 8.4, 6.5 Hz, 2H), 7.22 – 7.14 (m, 3H), 3.68 (d, *J* = 0.8 Hz, 3H), 3.48 – 3.33 (m, 4H), 3.18 (t, *J* = 7.5 Hz, 1H), 2.64 (dddd, *J* = 21.6, 10.8, 6.7, 3.1 Hz, 4H), 2.47 (q, *J* = 8.2, 6.3 Hz, 2H), 2.01 (tdd, *J* = 13.7, 10.4, 6.6 Hz, 2H), 1.45 (d, *J* = 0.8 Hz, 9H).

**<sup>13</sup>C NMR (126 MHz, Chloroform-*d*)** δ 172.3, 154.7, 141.3, 128.5, 128.4, 126.0, 79.6, 66.4, 51.1, 49.2, 32.1, 30.6, 28.4.

**HRMS (ESI) m/z:** [M+H]<sup>+</sup> Calcd. for C<sub>20</sub>H<sub>31</sub>N<sub>2</sub>O<sub>4</sub><sup>+</sup> 363.2278; Found: 363.2282

**tert-butyl 4-(4-(3,5-dimethylphenyl)-1-methoxy-1-oxobutan-2-yl)piperazine-1-carboxylate (6m)**

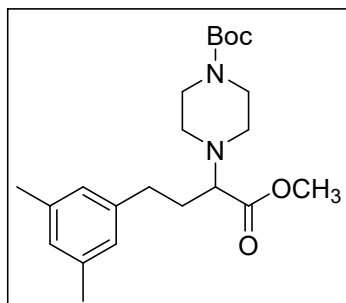

Following the experimental procedures (Condition A) on 0.2 mmol scale, colorless oil, yield: 90% (70.3 mg), column chromatography (silica gel, PE: EA = 10:1, v/v).

**<sup>1</sup>H NMR (500 MHz, Chloroform-*d*)** δ 6.85 – 6.77 (m, 3H), 3.69 (s, 3H), 3.44 (ddt, *J* = 15.3, 12.0, 5.9 Hz, 4H), 3.19 (t, *J* = 7.5 Hz, 1H), 2.66 – 2.53 (m, 4H), 2.51 – 2.42 (m, 2H), 2.28 (s, 6H), 2.04 – 1.91 (m, 2H), 1.45 (s, 9H).

**<sup>13</sup>C NMR (126 MHz, Chloroform-*d*)** δ 172.3, 154.7, 141.2, 137.8, 127.6, 126.3, 79.6, 66.5, 51.1, 49.2, 32.0, 30.8, 28.4, 21.3.

**HRMS (ESI) m/z:** [M+H]<sup>+</sup> Calcd. for C<sub>22</sub>H<sub>35</sub>N<sub>2</sub>O<sub>4</sub><sup>+</sup> 391.2591; Found: 391.2587

**tert-butyl 4-(4-(4-ethylphenyl)-1-methoxy-1-oxobutan-2-yl) piperazine-1-carboxylate (6n)**

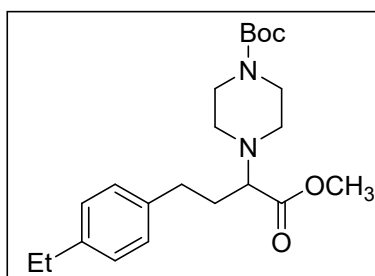

Following the experimental procedures (Condition A) on 0.2 mmol scale, colorless oil, yield: 89% (67.7 mg), column chromatography (silica gel, PE: EA = 10:1, v/v).

**<sup>1</sup>H NMR (500 MHz, Chloroform-*d*)** δ 7.15 – 7.06 (m, 4H), 3.67 (d, *J* = 1.1 Hz, 3H), 3.48 – 3.34 (m, 4H), 3.19 (t, *J* = 7.5 Hz, 1H), 2.67 – 2.57 (m, 6H), 2.52 – 2.42 (m, 2H), 2.06 – 1.92 (m, 2H), 1.45 (s, 9H), 1.22 (t, *J* = 7.6 Hz, 3H).

**<sup>13</sup>C NMR (126 MHz, Chloroform-*d*)** δ 172.3, 154.7, 141.9, 138.5, 128.4, 127.9, 79.6, 66.4, 51.1, 49.2, 31.7, 30.8, 28.5, 28.4, 15.7.



**HRMS (ESI) m/z:**  $[M+H]^+$  Calcd. for  $C_{22}H_{35}N_2O_4^+$  391.2591; Found: 391.2595

**tert-butyl 4-(4-([1,1'-biphenyl]-4-yl)-1-methoxy-1-oxobutan-2-yl) piperazine-1-carboxylate (6o)**

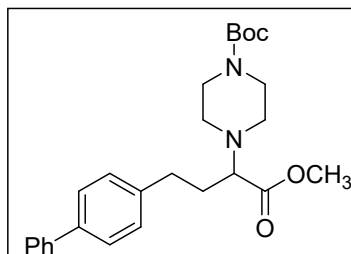

Following the experimental procedures (Condition A) on 0.2 mmol scale, colorless oil, yield: 95% (83.4 mg), column chromatography (silica gel, PE: EA = 10:1, v/v).

**$^1H$  NMR (500 MHz, Chloroform-*d*)**  $\delta$  7.61 – 7.56 (m, 2H), 7.55 – 7.51 (m, 2H), 7.43 (t,  $J = 7.7$  Hz, 2H), 7.35 – 7.26 (m, 3H), 3.70 (s, 3H), 3.50 – 3.37 (m, 4H), 3.23 (t,  $J = 7.5$  Hz, 1H), 2.72 (td,  $J = 7.5$ , 2.2 Hz, 2H), 2.69 – 2.63 (m, 2H), 2.50 (t,  $J = 9.8$  Hz, 2H), 2.07 (dtd,  $J = 16.1$ , 7.8, 6.4 Hz, 2H), 1.48 (s, 9H).

**$^{13}C$  NMR (126 MHz, Chloroform-*d*)**  $\delta$  172.2, 154.7, 141.0, 140.4, 139.0, 129.0, 128.8, 127.2, 127.1, 127.0, 79.6, 66.4, 51.1, 49.2, 31.8, 30.7, 28.5.

**HRMS (ESI) m/z:**  $[M+H]^+$  Calcd. for  $C_{22}H_{35}N_2O_4^+$  439.2591; Found: 439.2529

**tert-butyl 4-(1-methoxy-4-(4-methoxyphenyl)-1-oxobutan-2-yl)piperazine-1-carboxylate (6p)**

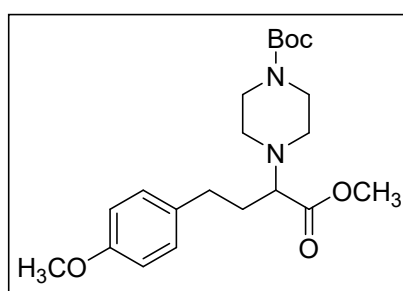

Following the experimental procedures (Condition A) on 0.2 mmol scale, colorless oil, yield: 86% (67.8mg), column chromatography (silica gel, PE: EA = 10:1, v/v).

**$^1H$  NMR (500 MHz, Chloroform-*d*)**  $\delta$  7.07 (d,  $J = 8.6$  Hz, 2H), 6.80 (d,  $J = 8.6$  Hz, 2H), 3.76 (s, 3H), 3.66 (s, 3H), 3.42 (ddt,  $J = 15.6$ , 12.4, 6.1 Hz, 4H), 3.15 (t,  $J = 7.5$  Hz, 1H), 2.59 (q,  $J = 7.3$  Hz, 4H), 2.48 – 2.41 (m, 2H), 2.01 – 1.90 (m, 2H), 1.43 (s, 9H).

**$^{13}C$  NMR (126 MHz, Chloroform-*d*)**  $\delta$  172.3, 157.9, 154.7, 133.3, 129.4, 113.8, 79.6, 66.2, 55.2, 51.1,

49.1, 31.2, 30.9, 28.4.

**HRMS (ESI) m/z:** [M+H]<sup>+</sup> Calcd. for C<sub>26</sub>H<sub>35</sub>N<sub>2</sub>O<sub>4</sub><sup>+</sup> 393.2384; Found: 393.2387

**tert-butyl 4-(1-methoxy-1-oxo-4-(3-(trifluoromethyl)phenyl)butan-2-yl)piperazine-1-carboxylate**

**(6q)**

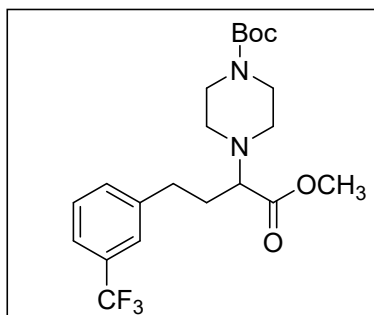

Following the experimental procedures (Condition A) on 0.2 mmol scale, colorless oil, yield: 61% (52.6 mg), column chromatography (silica gel, PE: EA = 10:1, v/v).

**<sup>1</sup>H NMR (500 MHz, Chloroform-*d*)**  $\delta$  7.43 (dt,  $J = 3.7, 2.0$  Hz, 2H), 7.40 – 7.33 (m, 2H), 3.66 (s, 3H), 3.41 (qdt,  $J = 13.2, 9.8, 3.8$  Hz, 4H), 3.12 (t,  $J = 7.6$  Hz, 1H), 2.77 – 2.67 (m, 2H), 2.63 (ddd,  $J = 10.8, 6.7, 3.5$  Hz, 2H), 2.46 – 2.40 (m, 2H), 2.04 – 1.95 (m, 2H), 1.44 (s, 9H).

**<sup>19</sup>F NMR (471 MHz, Chloroform-*d*)**  $\delta$  -62.59.

**<sup>13</sup>C NMR (126 MHz, Chloroform-*d*)**  $\delta$  172.0, 154.7, 142.2, 131.9, 130.7 (q,  $J = 31.9$  Hz), 128.8, 125.3 (d,  $J = 3.9$  Hz), 124.2 (q,  $J = 272.2$  Hz), 122.9 (q,  $J = 3.9$  Hz), 79.6, 66.0, 51.1, 49.1, 31.9, 30.3, 28.4.

**HRMS (ESI) m/z:** [M+H]<sup>+</sup> Calcd. for C<sub>21</sub>H<sub>30</sub>F<sub>3</sub>N<sub>2</sub>O<sub>4</sub><sup>+</sup> 431.2152; Found: 431.2155

**ethyl 2-(diisopropylamino)-4-phenylbutanoate (6r)**

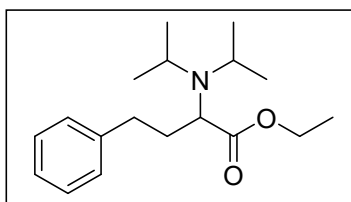

Following the experimental procedures (Condition A) on 0.2 mmol scale, colorless oil, yield: 89% (52.1 mg), column chromatography (silica gel, PE: EA = 15:1, v/v).

**<sup>1</sup>H NMR (500 MHz, Chloroform-*d*)**  $\delta$  7.30 (dd,  $J = 8.2, 7.0$  Hz, 2H), 7.24 – 7.18 (m, 3H), 4.15 (dddd,

$J = 17.9, 10.8, 7.1, 3.7$  Hz, 2H), 3.44 (t,  $J = 7.4$  Hz, 1H), 3.37 (p,  $J = 6.6$  Hz, 2H), 2.72 (ddd,  $J = 13.7, 10.4, 5.8$  Hz, 1H), 2.58 (ddd,  $J = 13.7, 10.7, 5.4$  Hz, 1H), 2.09 (dddd,  $J = 13.1, 10.5, 7.4, 5.4$  Hz, 1H), 1.83 (dddd,  $J = 13.5, 10.8, 7.5, 5.9$  Hz, 1H), 1.28 (t,  $J = 7.1$  Hz, 3H), 1.04 (dd,  $J = 9.4, 6.6$  Hz, 12H).

**$^{13}\text{C}$  NMR (126 MHz, Chloroform-*d*)**  $\delta$  175.6, 142.2, 128.4, 128.4, 125.8, 60.0, 56.8, 45.2, 33.6, 33.2, 23.5, 22.0, 14.2.

**HRMS (ESI)  $m/z$ :**  $[\text{M}+\text{H}]^+$  Calcd. for  $\text{C}_{18}\text{H}_{30}\text{NO}_2^+$  292.2271; Found: 292.2275

#### propyl 2-(diisopropylamino)-4-phenylbutanoate (6s)

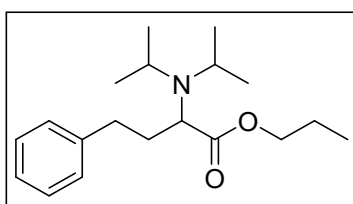

Following the experimental procedures (Condition A) on 0.2 mmol scale, colorless oil, yield: 92% (56.3 mg), column chromatography (silica gel, PE: EA = 10:1, v/v).

**$^1\text{H}$  NMR (500 MHz, Chloroform-*d*)**  $\delta$  7.30 (td,  $J = 7.2, 1.5$  Hz, 2H), 7.23 – 7.17 (m, 3H), 4.09 – 3.99 (m, 2H), 3.45 (t,  $J = 7.4$  Hz, 1H), 3.36 (p,  $J = 6.6$  Hz, 2H), 2.70 (ddd,  $J = 13.8, 10.4, 6.0$  Hz, 1H), 2.58 (ddd,  $J = 13.8, 10.6, 5.4$  Hz, 1H), 2.14 – 2.05 (m, 1H), 1.82 (dddd,  $J = 13.3, 10.6, 7.3, 6.0$  Hz, 1H), 1.72 – 1.63 (m, 2H), 1.03 (dd,  $J = 9.4, 6.6$  Hz, 12H), 0.98 (t,  $J = 7.4$  Hz, 3H).

**$^{13}\text{C}$  NMR (126 MHz, Chloroform-*d*)**  $\delta$  175.6, 142.2, 128.4, 128.4, 125.8, 65.8, 56.8, 45.2, 33.6, 33.2, 23.4, 22.0, 10.6.

**HRMS (ESI)  $m/z$ :**  $[\text{M}+\text{H}]^+$  Calcd. for  $\text{C}_{19}\text{H}_{32}\text{NO}_2^+$  306.2428; Found: 306.2432

#### isopropyl 2-(diisopropylamino)-4-phenylbutanoate (6t)

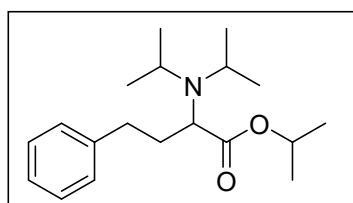

Following the experimental procedures (Condition A) on 0.2 mmol scale, colorless oil, yield: 87% (53.4 mg), column chromatography (silica gel, PE: EA = 10:1, v/v).

**$^1\text{H}$  NMR (500 MHz, Chloroform-*d*)**  $\delta$  7.30 (t,  $J = 7.6$  Hz, 2H), 7.21 (dd,  $J = 7.9, 2.3$  Hz, 3H), 5.03

(hept,  $J = 6.3$  Hz, 1H), 3.45 – 3.31 (m, 3H), 2.70 (ddd,  $J = 13.7, 10.5, 5.9$  Hz, 1H), 2.57 (ddd,  $J = 13.7, 10.8, 5.3$  Hz, 1H), 2.08 (dddd,  $J = 13.1, 10.5, 7.6, 5.3$  Hz, 1H), 1.81 (dddd,  $J = 13.4, 10.7, 7.4, 6.0$  Hz, 1H), 1.26 (dd,  $J = 9.4, 6.3$  Hz, 6H), 1.03 (dd,  $J = 13.5, 6.6$  Hz, 12H)

$^{13}\text{C}$  NMR (126 MHz, Chloroform-*d*)  $\delta$  175.0, 142.3, 128.4, 128.4, 125.8, 67.0, 57.0, 45.1, 33.6, 33.2, 23.4, 22.1, 21.9, 21.6.

HRMS (ESI)  $m/z$ :  $[\text{M}+\text{H}]^+$  Calcd. for  $\text{C}_{19}\text{H}_{32}\text{NO}_2^+$  306.2428; Found: 306.2431

#### 2-methoxyethyl 2-(diisopropylamino)-4-phenylbutanoate (6u)

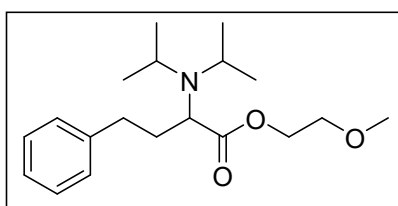

Following the experimental procedures (Condition A) on 0.2 mmol scale, colorless oil, yield: 79% (50.9 mg), column chromatography (silica gel, PE: EA = 10:1, v/v).

$^1\text{H}$  NMR (500 MHz, Chloroform-*d*)  $\delta$  7.29 (td,  $J = 7.3, 1.4$  Hz, 2H), 7.20 (dt,  $J = 8.3, 2.1$  Hz, 3H), 4.27 – 4.18 (m, 2H), 3.60 (t,  $J = 4.8$  Hz, 2H), 3.49 (t,  $J = 7.4$  Hz, 1H), 3.41 – 3.32 (m, 5H), 2.71 (ddd,  $J = 13.7, 10.6, 5.8$  Hz, 1H), 2.56 (ddd,  $J = 13.8, 10.8, 5.4$  Hz, 1H), 2.08 (dddd,  $J = 13.5, 10.6, 7.3, 5.4$  Hz, 1H), 1.83 (dddd,  $J = 13.5, 10.8, 7.6, 5.8$  Hz, 1H), 1.03 (dd,  $J = 11.9, 6.7$  Hz, 12H).

$^{13}\text{C}$  NMR (126 MHz, Chloroform-*d*)  $\delta$  175.6, 142.2, 128.4, 128.4, 125.8, 70.5, 63.0, 58.8, 56.7, 45.2, 33.6, 33.1, 23.5, 21.9.

HRMS (ESI)  $m/z$ :  $[\text{M}+\text{H}]^+$  Calcd. for  $\text{C}_{19}\text{H}_{32}\text{NO}_3^+$  322.2377; Found: 322.2377

#### 2-ethoxyethyl 2-(diisopropylamino)-4-phenylbutanoate (6v)

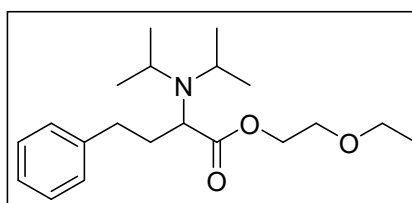

Following the experimental procedures (Condition A) on 0.2 mmol scale, colorless oil, yield: 77% (51.9 mg), column chromatography (silica gel, PE: EA = 10:1, v/v).

$^1\text{H}$  NMR (500 MHz, Chloroform-*d*)  $\delta$  7.28 (dd,  $J = 8.1, 7.0$  Hz, 2H), 7.22 – 7.15 (m, 3H), 4.29 – 4.16

(m, 2H), 3.63 (t,  $J = 4.9$  Hz, 2H), 3.50 (dq,  $J = 14.7, 7.2$  Hz, 3H), 3.36 (p,  $J = 6.7$  Hz, 2H), 2.71 (ddd,  $J = 13.7, 10.5, 5.9$  Hz, 1H), 2.57 (ddd,  $J = 13.7, 10.7, 5.4$  Hz, 1H), 2.14 – 2.03 (m, 1H), 1.82 (dddd,  $J = 13.4, 10.7, 7.6, 5.9$  Hz, 1H), 1.20 (t,  $J = 7.0$  Hz, 3H), 1.02 (dd,  $J = 13.6, 6.6$  Hz, 12H).

$^{13}\text{C}$  NMR (126 MHz, Chloroform-*d*)  $\delta$  175.6, 142.2, 128.4, 128.3, 125.8, 68.4, 66.5, 63.2, 56.7, 45.2, 33.6, 33.1, 23.5, 21.9, 15.1.

HRMS (ESI)  $m/z$ :  $[\text{M}+\text{H}]^+$  Calcd. for  $\text{C}_{20}\text{H}_{34}\text{NO}_3^+$  336.2533; Found: 336.2533

### 2-fluoro-5-phenylfuran (7a)

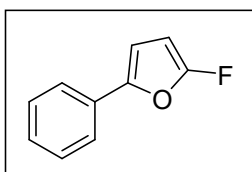

Following the experimental procedures (Condition A) on 0.2 mmol scale, colorless oil, yield: 82% (26.7 mg), column chromatography (silica gel, PE).

$^1\text{H}$  NMR (500 MHz, Chloroform-*d*)  $\delta$  7.62 – 7.58 (m, 2H), 7.43 – 7.38 (m, 2H), 7.31 – 7.26 (m, 1H), 6.56 (t,  $J = 3.2$  Hz, 1H), 5.54 (dd,  $J = 7.1, 3.4$  Hz, 1H).

$^{19}\text{F}$  NMR (471 MHz, Chloroform-*d*)  $\delta$  -115.4.

$^{13}\text{C}$  NMR (126 MHz, Chloroform-*d*)  $\delta$  157.6 (d,  $J = 276.3$  Hz), 144.3, 130.1, 128.7, 127.2, 123.0 (d,  $J = 1.7$  Hz), 106.0, 83.1 (d,  $J = 12.8$  Hz).

HRMS (ESI)  $m/z$ :  $[\text{M}+\text{H}]^+$  Calcd. for  $\text{C}_{10}\text{H}_8\text{FO}^+$  163.0554; Found: 163.0558

### 2-([1,1'-biphenyl]-4-yl)-5-fluorofuran (7b)

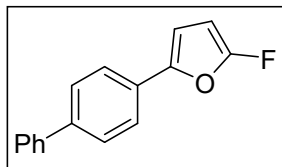

Following the experimental procedures (Condition A) on 0.2 mmol scale, white solid (mp: 54 – 56 °C), yield: 97% (46.3mg), column chromatography (silica gel, PE).

$^1\text{H}$  NMR (500 MHz, Chloroform-*d*)  $\delta$  7.66 (dq,  $J = 9.2, 6.0, 3.8$  Hz, 6H), 7.50 (q,  $J = 7.1, 6.6$  Hz, 2H), 7.42 (t,  $J = 7.3$  Hz, 1H), 6.61 (t,  $J = 3.4$  Hz, 1H), 5.58 (dd,  $J = 7.1, 3.4$  Hz, 1H).

$^{19}\text{F}$  NMR (471 MHz, Chloroform-*d*)  $\delta$  -115.0.

**<sup>13</sup>C NMR (126 MHz, Chloroform-*d*)**  $\delta$  157.7 (d,  $J = 276.2$  Hz), 144.1, 140.5 (d,  $J = 3.8$  Hz), 139.9 (d,  $J = 3.5$  Hz), 129.0 (d,  $J = 3.4$  Hz), 128.9 (d,  $J = 3.9$  Hz), 127.5, 127.4, 126.9 (d,  $J = 3.4$  Hz), 123.4 (d,  $J = 1.8$  Hz), 106.2, 83.3 (d,  $J = 12.7$  Hz).

**HRMS (ESI) m/z:** [M+H]<sup>+</sup> Calcd. for C<sub>16</sub>H<sub>12</sub>FO<sup>+</sup> 239.0867; Found: 239.0866

### 2-([1,1'-biphenyl]-2-yl)-5-fluorofuran (7c)

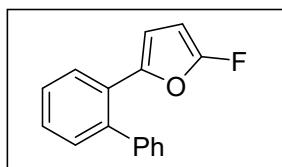

Following the experimental procedures (Condition A) on 0.2 mmol scale, colorless oil, yield: 68% (32.6 mg), column chromatography (silica gel, PE).

**<sup>1</sup>H NMR (500 MHz, DMSO-*d*<sub>6</sub>)**  $\delta$  7.64 (dd,  $J = 7.8, 1.4$  Hz, 1H), 7.47 – 7.37 (m, 5H), 7.27 (ddd,  $J = 16.5, 7.7, 1.5$  Hz, 3H), 5.70 – 5.63 (m, 2H).

**<sup>19</sup>F NMR (471 MHz, DMSO-*d*<sub>6</sub>)**  $\delta$  -116.9.

**<sup>13</sup>C NMR (126 MHz, DMSO-*d*<sub>6</sub>)**  $\delta$  156.8 (d,  $J = 274.1$  Hz), 143.4, 141.5, 139.3 (d,  $J = 1.8$  Hz), 131.1, 129.0, 128.9, 128.3, 128.3, 128.1, 127.9, 127.1, 110.7, 83.9 (d,  $J = 12.3$  Hz).

**HRMS (ESI) m/z:** [M+H]<sup>+</sup> Calcd. for C<sub>16</sub>H<sub>12</sub>FO<sup>+</sup> 239.0867; Found: 239.0867

### 2-fluoro-5-(4-fluorophenyl)furan (7d)

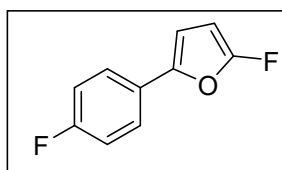

Following the experimental procedures (Condition A) on 0.2 mmol scale, colorless oil, yield: 81% (29.3 mg), column chromatography (silica gel, PE).

**<sup>1</sup>H NMR (500 MHz, DMSO-*d*<sub>6</sub>)**  $\delta$  7.47 – 7.41 (m, 3H), 7.14 – 7.05 (m, 2H), 5.94 (dd,  $J = 7.0, 3.5$  Hz, 1H).

**<sup>19</sup>F NMR (471 MHz, DMSO-*d*<sub>6</sub>)**  $\delta$  -112.6, -115.2.

**<sup>13</sup>C NMR (126 MHz, DMSO-*d*<sub>6</sub>)**  $\delta$  163.1 (d,  $J = 243.3$  Hz), 157.3 (d,  $J = 275.6$  Hz), 143.0 (d,  $J = 3.2$  Hz), 132.0 (d,  $J = 8.9$  Hz), 131.5 (d,  $J = 8.7$  Hz), 119.1 (d,  $J = 2.7$  Hz), 114.6 (d,  $J = 21.2$  Hz), 109.9

(dd,  $J = 24.1, 1.9$  Hz), 109.3, 84.8 (d,  $J = 12.3$  Hz).

**HRMS (ESI) m/z:**  $[M+H]^+$  Calcd. for  $C_{10}H_7F_2O^+$  181.0459; Found: 181.0458

### 2-(4-chlorophenyl)-5-fluorofuran (7e)

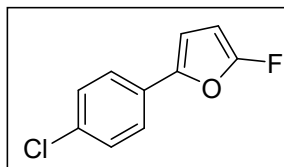

Following the experimental procedures (Condition A) on 0.2 mmol scale, colorless oil, yield: 84% (33.2 mg), column chromatography (silica gel, PE).

**$^1H$  NMR (500 MHz, Chloroform-*d*)**  $\delta$  7.49 – 7.46 (m, 2H), 7.35 – 7.31 (m, 2H), 6.52 (t,  $J = 3.2$  Hz, 1H), 5.52 (dd,  $J = 7.1, 3.4$  Hz, 1H).

**$^{19}F$  NMR (471 MHz, Chloroform-*d*)**  $\delta$  -114.8.

**$^{13}C$  NMR (126 MHz, Chloroform-*d*)**  $\delta$  157.7 (d,  $J = 277.0$  Hz), 143.3, 128.9, 128.5, 124.2 (d,  $J = 1.7$  Hz), 106.5, 83.4 (d,  $J = 12.7$  Hz).

**HRMS (ESI) m/z:**  $[M+H]^+$  Calcd. for  $C_{10}H_7ClFO^+$  197.0164; Found: 197.0169

### 2-(4-bromophenyl)-5-fluorofuran (7f)

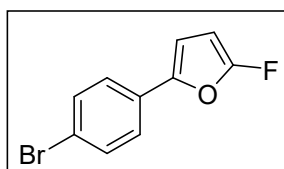

Following the experimental procedures (Condition A) on 0.2 mmol scale, colorless oil, yield: 81% (38.9 mg), column chromatography (silica gel, PE).

**$^1H$  NMR (500 MHz, Chloroform-*d*)**  $\delta$  7.50 – 7.47 (m, 2H), 7.44 – 7.38 (m, 2H), 6.53 (t,  $J = 3.3$  Hz, 1H), 5.52 (dd,  $J = 7.1, 3.4$  Hz, 1H).

**$^{19}F$  NMR (471 MHz, Chloroform-*d*)**  $\delta$  -114.6.

**$^{13}C$  NMR (126 MHz, Chloroform-*d*)**  $\delta$  157.7 (d,  $J = 277.2$  Hz), 143.3, 131.9, 129.0, 124.4 (d,  $J = 1.7$  Hz), 120.9, 106.6, 83.4 (d,  $J = 12.7$  Hz).

**HRMS (ESI) m/z:**  $[M+H]^+$  Calcd. for  $C_{10}H_7BrFO^+$  240.9659; Found: 240.9655

### 2-fluoro-5-(4-iodophenyl) furan (7g)

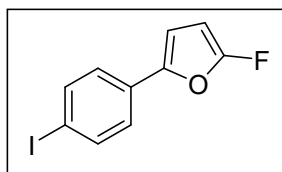

Following the experimental procedures (Condition A) on 0.2 mmol scale, colorless oil, yield: 82% (47.3 mg), column chromatography (silica gel, PE).

$^1\text{H NMR}$  (500 MHz,  $\text{DMSO-}d_6$ )  $\delta$  7.79 – 7.72 (m, 2H), 7.43 – 7.37 (m, 2H), 7.00 (t,  $J = 3.4$  Hz, 1H), 5.91 (dd,  $J = 6.9, 3.6$  Hz, 1H).

$^{19}\text{F NMR}$  (471 MHz,  $\text{DMSO-}d_6$ )  $\delta$  -115.3.

$^{13}\text{C NMR}$  (126 MHz,  $\text{DMSO-}d_6$ )  $\delta$  157.2 (d,  $J = 275.5$  Hz), 143.3, 138.1, 129.3, 125.1 (d,  $J = 1.8$  Hz), 108.6, 93.5, 84.8 (d,  $J = 12.3$  Hz).

**HRMS (ESI) m/z:**  $[\text{M}+\text{H}]^+$  Calcd. for  $\text{C}^{10}\text{H}^7\text{FIO}^+$  288.9520; Found: 272.0713

### 2-fluoro-5-(4-(trifluoromethyl)phenyl)furan (7h)

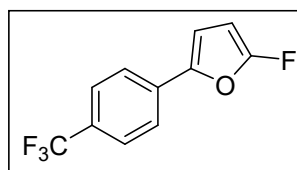

Following the experimental procedures (Condition A) on 0.2 mmol scale, colorless oil, yield: 90% (41.5 mg), column chromatography (silica gel, PE).

$^1\text{H NMR}$  (500 MHz,  $\text{DMSO-}d_6$ )  $\delta$  7.78 (d,  $J = 8.3$  Hz, 2H), 7.72 (d,  $J = 8.3$  Hz, 2H), 7.16 (t,  $J = 3.5$  Hz, 1H), 5.97 (dd,  $J = 7.0, 3.5$  Hz, 1H).

$^{19}\text{F NMR}$  (471 MHz,  $\text{DMSO-}d_6$ )  $\delta$  -61.2, -114.4.

$^{13}\text{C NMR}$  (126 MHz,  $\text{DMSO-}d_6$ )  $\delta$  157.7 (d,  $J = 276.2$  Hz), 142.7, 133.4, 127.8 (q,  $J = 31.5$  Hz), 126.3 (q,  $J = 3.9$  Hz), 124.6 (q,  $J = 269.6$  Hz), 123.5 (d,  $J = 1.5$  Hz), 110.5, 85.1 (d,  $J = 12.4$  Hz).

**HRMS (ESI) m/z:**  $[\text{M}+\text{H}]^+$  Calcd. for  $\text{C}_{11}\text{H}_7\text{F}_4\text{O}^+$  231.0428; Found: 231.0425

### 2-fluoro-5-(2-(trifluoromethyl)phenyl)furan (7i)



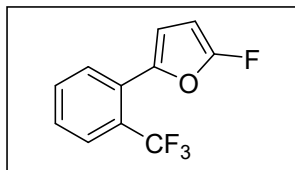

Following the experimental procedures (Condition A) on 0.2 mmol scale, colorless oil, yield: 82% (38.0 mg), column chromatography (silica gel, PE).

**<sup>1</sup>H NMR (500 MHz, DMSO-*d*<sub>6</sub>)** δ 7.83 (d, *J* = 7.9 Hz, 1H), 7.77 – 7.69 (m, 2H), 7.58 (ddt, *J* = 8.2, 5.7, 1.5 Hz, 1H), 6.80 (t, *J* = 3.4 Hz, 1H), 5.95 (dd, *J* = 6.9, 3.5 Hz, 1H).

**<sup>19</sup>F NMR (471 MHz, DMSO-*d*<sub>6</sub>)** δ -58.7, -115.2.

**<sup>13</sup>C NMR (126 MHz, DMSO-*d*<sub>6</sub>)** δ 157.6 (d, *J* = 275.2 Hz), 141.0, 133.2, 130.5 (d, *J* = 1.6 Hz), 129.2, 128.1 (d, *J* = 2.3 Hz), 127.2 (q, *J* = 5.8 Hz), 125.5 (q, *J* = 30.2 Hz), 124.3 (q, *J* = 273.4 Hz), 112.4 (d, *J* = 2.6 Hz), 84.5 (d, *J* = 12.2 Hz).

**HRMS (ESI) m/z:** [M+H]<sup>+</sup> Calcd. for C<sub>11</sub>H<sub>7</sub>F<sub>4</sub>O<sup>+</sup> 231.0428; Found: 231.0426

#### 2-fluoro-5-(naphthalen-2-yl) furan (7j)

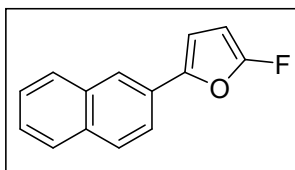

Following the experimental procedures (Condition A) on 0.2 mmol scale, colorless oil, yield: 95% (40.4 mg), column chromatography (silica gel, PE).

**<sup>1</sup>H NMR (500 MHz, DMSO-*d*<sub>6</sub>)** δ 8.09 (d, *J* = 1.8 Hz, 1H), 7.93 (dd, *J* = 9.1, 2.6 Hz, 2H), 7.88 (dd, *J* = 7.7, 1.5 Hz, 1H), 7.77 (dd, *J* = 8.6, 1.9 Hz, 1H), 7.53 – 7.45 (m, 2H), 7.06 (t, *J* = 3.4 Hz, 1H), 5.93 (dd, *J* = 7.0, 3.5 Hz, 1H).

**<sup>19</sup>F NMR (471 MHz, DMSO-*d*<sub>6</sub>)** δ -115.5.

**<sup>13</sup>C NMR (126 MHz, DMSO-*d*<sub>6</sub>)** δ 157.3 (d, *J* = 275.2 Hz), 144.3, 133.5, 132.6, 129.0, 128.4, 128.1, 127.2, 126.6, 121.7 (d, *J* = 1.6 Hz), 121.1 (d, *J* = 1.9 Hz), 108.4, 84.7 (d, *J* = 12.4 Hz).

**HRMS (ESI) m/z:** [M+H]<sup>+</sup> Calcd. for C<sub>14</sub>H<sub>10</sub>FO<sup>+</sup> 213.0710; Found: 213.0713

#### 2-fluoro-5-(pyren-1-yl)furan(7k)

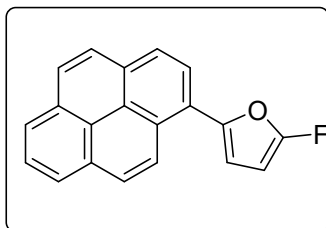

Following the experimental procedures (Condition A) on 0.2 mmol scale, white solid (mp: 60 – 62 °C), yield: 53% (30.5 mg), column chromatography (silica gel, PE).

**<sup>1</sup>H NMR (500 MHz, DMSO-*d*<sub>6</sub>)** δ 8.58 (d, *J* = 9.3 Hz, 1H), 8.33 – 8.28 (m, 3H), 8.26 – 8.15 (m, 4H), 8.09 (t, *J* = 7.6 Hz, 1H), 7.10 (t, *J* = 3.4 Hz, 1H), 6.09 (dd, *J* = 6.9, 3.5 Hz, 1H).

**<sup>19</sup>F NMR (471 MHz, DMSO-*d*<sub>6</sub>)** δ -115.3.

**<sup>13</sup>C NMR (126 MHz, DMSO-*d*<sub>6</sub>)** δ 157.8 (d, *J* = 274.9 Hz), 144.0, 131.4, 131.0, 130.7, 129.0, 128.3, 127.7, 127.1, 127.0, 126.2, 126.0, 125.8, 125.6, 124.7, 124.4, 124.3, 112.4, 84.7 (d, *J* = 12.1 Hz).

**HRMS (ESI) m/z:** [M+H]<sup>+</sup> Calcd. for C<sub>20</sub>H<sub>12</sub>FO<sup>+</sup> 287.0867; Found: 287.0861

#### 2-(9H-fluoren-2-yl)-5-fluorofuran (7l)

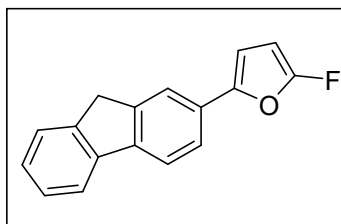

Following the experimental procedures (Condition A) on 0.2 mmol scale, white solid (mp: 52 – 54 °C), yield: 83% (41.7 mg), column chromatography (silica gel, PE).

**<sup>1</sup>H NMR (500 MHz, DMSO-*d*<sub>6</sub>)** δ 7.91 (dd, *J* = 12.3, 7.7 Hz, 2H), 7.85 – 7.79 (m, 1H), 7.65 (dd, *J* = 8.0, 1.6 Hz, 1H), 7.59 (d, *J* = 7.4 Hz, 1H), 7.42 – 7.36 (m, 1H), 7.32 (td, *J* = 7.4, 1.2 Hz, 1H), 6.99 (t, *J* = 3.4 Hz, 1H), 5.93 (dd, *J* = 7.0, 3.5 Hz, 1H), 3.95 (s, 2H).

**<sup>19</sup>F NMR (471 MHz, DMSO-*d*<sub>6</sub>)** δ -116.1.

**<sup>13</sup>C NMR (126 MHz, DMSO-*d*<sub>6</sub>)** δ 157.1 (d, *J* = 274.6 Hz), 144.7, 144.2, 143.7, 141.1, 140.9, 128.4, 127.4, 127.3, 125.6, 122.1, 120.9, 120.6, 119.9, 107.4, 84.6 (d, *J* = 12.5 Hz), 36.9.

**HRMS (ESI) m/z:** [M+H]<sup>+</sup> Calcd. for C<sub>17</sub>H<sub>12</sub>FO<sup>+</sup> 251.0867; Found: 251.0872

#### 2-(4-bromo-2-fluorophenyl)-5-fluorofuran (7m)

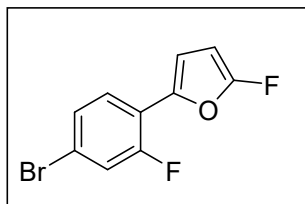

Following the experimental procedures (Condition A) on 0.2 mmol scale, colorless oil, yield: 69% (35.7 mg), column chromatography (silica gel, PE).

**<sup>1</sup>H NMR (500 MHz, DMSO-*d*<sub>6</sub>)**  $\delta$  7.60 (dd, *J* = 11.0, 2.0 Hz, 1H), 7.54 (t, *J* = 8.4 Hz, 1H), 7.44 (dd, *J* = 8.5, 1.9 Hz, 1H), 6.82 (q, *J* = 3.4 Hz, 1H), 5.94 (dd, *J* = 7.0, 3.6 Hz, 1H).

**<sup>19</sup>F NMR (471 MHz, DMSO-*d*<sub>6</sub>)**  $\delta$  -112.6, -115.3.

**<sup>13</sup>C NMR (126 MHz, DMSO-*d*<sub>6</sub>)**  $\delta$  158.7 (d, *J* = 47.5 Hz), 156.6 (dd, *J* = 68.5, 2.3 Hz), 137.9 (d, *J* = 3.0 Hz), 128.6 (d, *J* = 3.6 Hz), 126.9 (d, *J* = 3.6 Hz), 120.6 (d, *J* = 9.6 Hz), 120.0 (d, *J* = 24.5 Hz), 117.1 (d, *J* = 12.0 Hz), 113.0 (d, *J* = 11.3 Hz), 85.0 (d, *J* = 12.3 Hz).

**HRMS (ESI) m/z:** [M+H]<sup>+</sup> Calcd. for C<sub>10</sub>H<sub>6</sub>BrF<sub>2</sub>O<sup>+</sup> 258.9565; Found: 258.9562

#### 2-fluoro-5-(2-fluoro-4-methylphenyl) furan (7n)

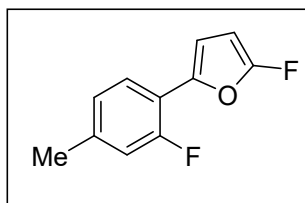

Following the experimental procedures (Condition A) on 0.2 mmol scale, colorless oil, yield: 79% (30.8 mg), column chromatography (silica gel, PE).

**<sup>1</sup>H NMR (500 MHz, Chloroform-*d*)**  $\delta$  7.54 (t, *J* = 8.0 Hz, 1H), 7.01 – 6.88 (m, 2H), 6.65 (q, *J* = 3.3 Hz, 1H), 5.53 (dd, *J* = 7.0, 3.4 Hz, 1H), 2.35 (s, 3H).

**<sup>19</sup>F NMR (471 MHz, Chloroform-*d*)**  $\delta$  -116.0, -116.3.

**<sup>13</sup>C NMR (126 MHz, Chloroform-*d*)**  $\delta$  159.0 (dd, *J* = 122.1, 2.2 Hz), 156.9 (dd, *J* = 122.1, 2.2 Hz), 139.1 (d, *J* = 2.9 Hz), 138.7 (d, *J* = 8.1 Hz), 125.0 (d, *J* = 3.2 Hz), 125.0 (d, *J* = 3.2 Hz), 116.4 (d, *J* = 21.0 Hz), 115.5 (d, *J* = 12.1 Hz), 110.6 (d, *J* = 12.1 Hz), 83.2 (dd, *J* = 12.5, 2.0 Hz), 21.1 (d, *J* = 1.7 Hz).

**HRMS (ESI) m/z:** [M+H]<sup>+</sup> Calcd. for C<sub>11</sub>H<sub>9</sub>F<sub>2</sub>O<sup>+</sup> 195.0616; Found: 195.0613

## 2-fluoro-5-(3-fluoro-4-methoxyphenyl)furan (7o)

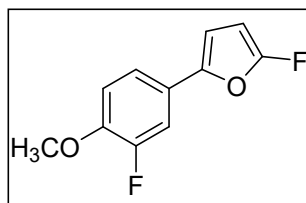

Following the experimental procedures (Condition A) on 0.2 mmol scale, colorless oil, yield: 38% (16.1 mg), column chromatography (silica gel, PE).

**<sup>1</sup>H NMR (500 MHz, DMSO-*d*<sub>6</sub>)**  $\delta$  7.59 – 7.52 (m, 1H), 6.96 (dt, *J* = 13.3, 2.1 Hz, 1H), 6.87 (dt, *J* = 8.7, 2.8 Hz, 1H), 6.65 (q, *J* = 3.3 Hz, 1H), 5.90 (dt, *J* = 7.0, 3.6 Hz, 1H), 3.80 (s, 3H).

**<sup>19</sup>F NMR (471 MHz, DMSO-*d*<sub>6</sub>)**  $\delta$  -113.1, -117.2.

**<sup>13</sup>C NMR (126 MHz, DMSO-*d*<sub>6</sub>)**  $\delta$  160.3 (d, *J* = 11.2 Hz), 159.1 (dd, *J* = 248.6, 2.4 Hz), 156.9 (dd, *J* = 273.9, 1.6 Hz), 139.0 (d, *J* = 2.7 Hz), 126.6 (d, *J* = 4.5 Hz), 111.5 (d, *J* = 2.9 Hz), 110.5 (d, *J* = 12.5 Hz), 109.9 (dd, *J* = 10.0, 2.6 Hz), 102.8 (d, *J* = 25.3 Hz), 84.3 (d, *J* = 11.7 Hz), 56.2.

**HRMS (ESI) m/z:** [M+H]<sup>+</sup> Calcd. for C<sub>11</sub>H<sub>9</sub>F<sub>2</sub>O<sub>2</sub><sup>+</sup> 211.0565; Found: 211.0561

## 6. Crystal Data

### Crystal data of 4r

Method for single crystals cultivation: a pure solid sample (10–20 mg) was dissolved in ethyl acetate (2 mL) in a vial at room temperature, and petroleum ether/hexane (2-3 mL) was added into the above solution slowly while keeping the sample completely dissolved. The vial was properly sealed with parafilm and kept at room temperature to allow the slow evaporation of the solvents until a single crystal was obtained.

The data were collected on a Agilent Gemini E diffractometer (Mo, 50kV 40mA) instrument using Mo-K $\alpha$  radiation ( $\lambda = 0.71073 \text{ \AA}$ ) at 296 K and reduced by CrysAlisPro (Rigaku). The crystal structures were solved and refined using the SHELXTL software package. Refinements were performed with SHELXL-2013 using fullmatrix least-squares calculations on F<sup>2</sup>, with anisotropic displacement parameters for all the nonhydrogen atoms. The crystallographic data have already been deposited at the Cambridge Crystallographic Data Centre.

Crystallographic data for compound **4r** (CCDC-2108960) has been deposited with the Cambridge Crystallographic Data Centre. Copies of the data can be obtained, free of charge, on application to CCDC (Email:deposit@ccdc.cam.ac.uk). Thermal ellipsoids are drawn at 50% probability level

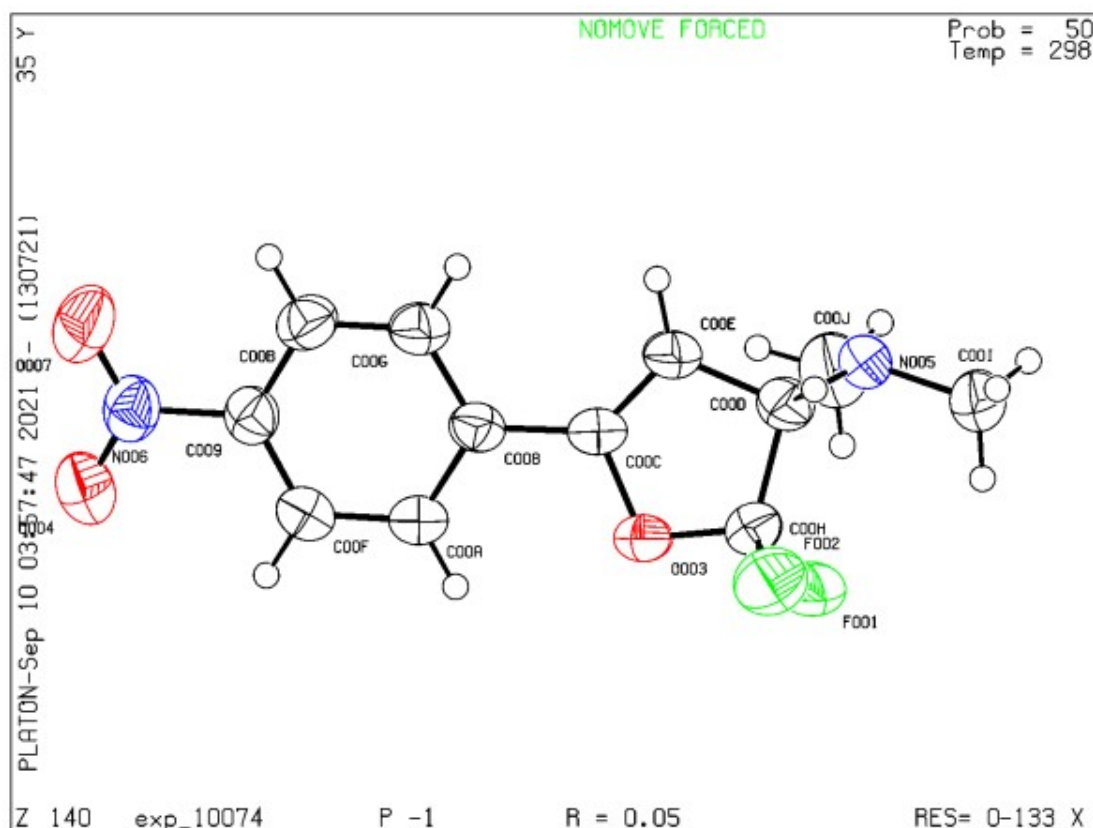

Bond precision: C-C = 0.0033Å Wavelength=0.71073

Cell: a=7.7214(13) b=9.3290(16) c=9.6652(12)  
 alpha=112.760(14) beta=100.215(12) gamma=90.299(14)

Temperature: 298 K

|                | Calculated          | Reported               |
|----------------|---------------------|------------------------|
| Volume         | 629.80(19)          | 629.80(19)             |
| Space group    | P -1                | P -1                   |
| Hall group     | -P 1                | -P 1                   |
| Moiety formula | C12 H12 Br F2 N2 O2 | 0.67(C12 H12 F2 N2 O3) |
| Sum formula    | C12 H12 Br F2 N2 O2 | C8 H8 F1.333 N1.333 O2 |
| Mr             | 270.24              | 180.16                 |
| Dx,g cm-3      | 1.425               | 1.425                  |
| Z              | 2                   | 3                      |
| Mu (mm-1)      | 0.122               | 0.122                  |
| F000           | 280.0               | 280.2                  |

|           |         |             |
|-----------|---------|-------------|
| F000'     | 280.19  |             |
| h,k,lmax  | 9,11,11 | 9,11,11     |
| Nref      | 2220    | 2212        |
| Tmin,Tmax |         | 0.661,1.000 |
| Tmin'     |         |             |

Correction method= # Reported T Limits: Tmin=0.661 Tmax=1.000

AbsCorr = MULTI-SCAN

Data completeness= 0.996

Theta(max)= 25.000

R(reflections)= 0.0487 ( 1542)

wR2(reflections)= 0.1576( 2212)

S = 0.974

Npar= 173

## Crystal data of **5k**

Method for single crystals cultivation: a pure solid sample (10–20 mg) was dissolved in ethyl acetate (2 mL) in a vial at room temperature, and petroleum ether/hexane (2-3 mL) was added into the above solution slowly while keeping the sample completely dissolved. The vial was properly sealed with parafilm and kept at room temperature to allow the slow evaporation of the solvents until a single crystal was obtained.

The data were collected on a Agilent Gemini E diffractometer (Mo, 50kV 40mA) instrument using Mo-K $\alpha$  radiation ( $\lambda = 0.71073 \text{ \AA}$ ) at 296 K and reduced by CrysAlisPro (Rigaku). The crystal structures were solved and refined using the SHELXTL software package. Refinements were performed with SHELXL-2013 using fullmatrix least-squares calculations on F<sup>2</sup>, with anisotropic displacement parameters for all the nonhydrogen atoms. The crystallographic data have already been deposited at the Cambridge Crystallographic Data Centre.

Crystallographic data for compound **5k** (CCDC-2124886) has been deposited with the Cambridge Crystallographic Data Centre. Copies of the data can be obtained, free of charge, on application to CCDC (Email:deposit@ccdc.cam.ac.uk). Thermal ellipsoids are drawn at 50% probability level

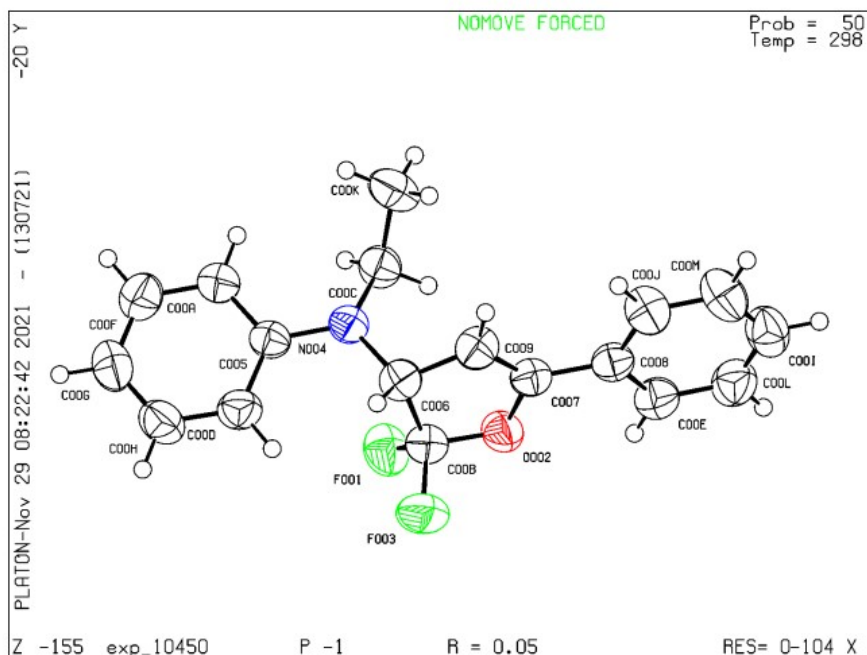

Bond precision: C-C = 0.0044A Wavelength=0.71073  
 Cell: a=9.4835(17) b=9.8772(13) c=9.941(2)  
 alpha=107.076(15) beta=117.98(2) gamma=93.602(12)  
 Temperature: 298 K

|                | Calculated     | Reported       |
|----------------|----------------|----------------|
| Volume         | 763.6(3)       | 763.6(3)       |
| Space group    | P -1           | P -1           |
| Hall group     | -P 1           | -P 1           |
| Moiety formula | C18 H17 F2 N O | C18 H17 F2 N O |
| Sum formula    | C18 H17 F2 N O | C18 H17 F2 N O |
| Mr             | 301.33         | 301.34         |
| Dx,g cm-3      | 1.311          | 1.311          |
| Z              | 2              | 2              |
| Mu (mm-1)      | 0.098          | 0.098          |
| F000           | 316.0          | 316.2          |
| F000'          | 316.18         |                |
| h,k,lmax       | 11,11,11       | 11,11,11       |
| Nref           | 2684           | 2677           |
| Tmin,Tmax      |                | 0.817,1.000    |
| Tmin'          |                |                |

Correction method= # Reported T Limits: Tmin=0.817 Tmax=1.000  
 AbsCorr = MULTI-SCAN

Data completeness= 0.997 Theta(max)= 25.000  
 R(reflections)= 0.0541( 1669) wR2(reflections)= 0.1767( 2677)  
 S = 0.937 Npar= 199

## Crystal data of **5u**

Method for single crystals cultivation: a pure solid sample (10–20 mg) was dissolved in ethyl acetate (2 mL) in a vial at room temperature, and petroleum ether/hexane (2-3 mL) was added into the above solution slowly while keeping the sample completely dissolved. The vial was properly sealed with parafilm and kept at room temperature to allow the slow evaporation of the solvents until a single crystal was obtained.

The data were collected on a Agilent Gemini E diffractometer (Mo, 50kV 40mA) instrument using Mo-K $\alpha$  radiation ( $\lambda = 0.71073 \text{ \AA}$ ) at 296 K and reduced by CrysAlisPro (Rigaku). The crystal structures were solved and refined using the SHELXTL software package. Refinements were performed with SHELXL-2013 using fullmatrix least-squares calculations on F<sup>2</sup>, with anisotropic displacement parameters for all the nonhydrogen atoms. The crystallographic data have already been deposited at the Cambridge Crystallographic Data Centre.

Crystallographic data for compound **5u** (CCDC-2131035) has been deposited with the Cambridge Crystallographic Data Centre, Copies of the data can be obtained, free of charge, on application to CCDC (Email:deposit@ccdc.cam.ac.uk). Thermal ellipsoids are drawn at 50% probability level

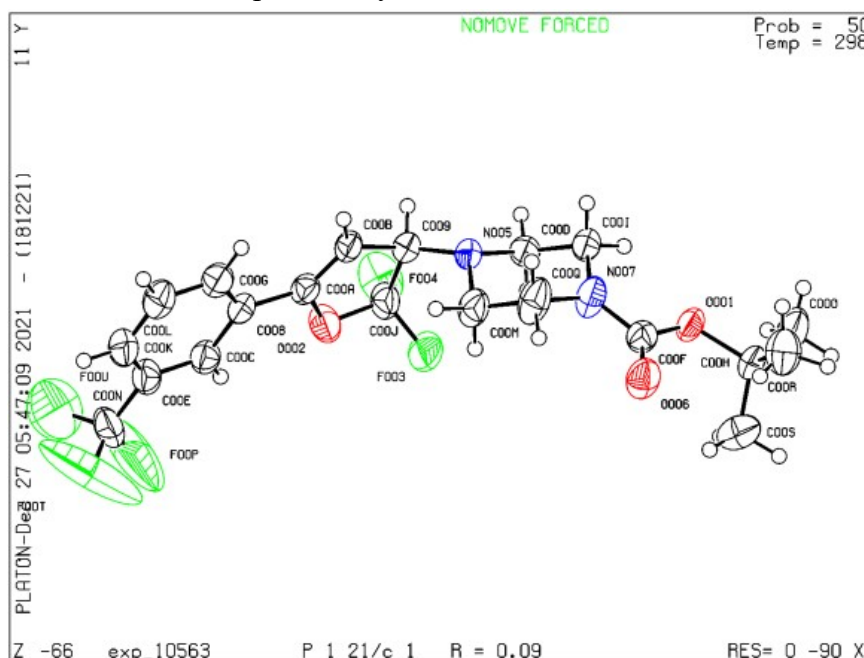

Bond precision:

C-C = 0.0057Å

Wavelength=0.71073



Cell: a=12.2619(15) b=10.4477(16) c=16.5000(17)  
alpha=90 beta=99.896(12) gamma=90

Temperature: 298 K

|                | Calculated       | Reported         |
|----------------|------------------|------------------|
| Volume         | 2082.3(5)        | 2082.3(5)        |
| Space group    | P 21/c           | P 1 21/c 1       |
| Hall group     | -P 2ybc          | -P 2ybc          |
| Moiety formula | C20 H23 F5 N2 O3 | C20 H23 F5 N2 O3 |
| Sum formula    | C20 H23 F5 N2 O3 | C20 H23 F5 N2 O3 |
| Mr             | 434.40           | 434.41           |
| Dx,g cm-3      | 1.386            | 1.385            |
| Z              | 4                | 4                |
| Mu (mm-1)      | 0.123            | 0.123            |
| F000           | 904.0            | 904.7            |
| F000'          | 904.65           |                  |
| h,k,lmax       | 14,12,19         | 14,12,19         |
| Nref           | 3681             | 3668             |
| Tmin,Tmax      |                  | 0.608,1.000      |
| Tmin'          |                  |                  |

Correction method= # Reported T Limits: Tmin=0.608 Tmax=1.000

AbsCorr = MULTI-SCAN

Data completeness= 0.996

Theta(max)= 25.000

R(reflections)= 0.0922( 2547)

wR2(reflections)= 0.2709( 3668)

S = 1.606

Npar= 273

## 7. NMR Spectra

<sup>1</sup>H spectrum (CDCl<sub>3</sub>) of 2,2-difluoro-N, N-dimethyl-5-phenyl-2,3-dihydrofuran-3-amine (4a)

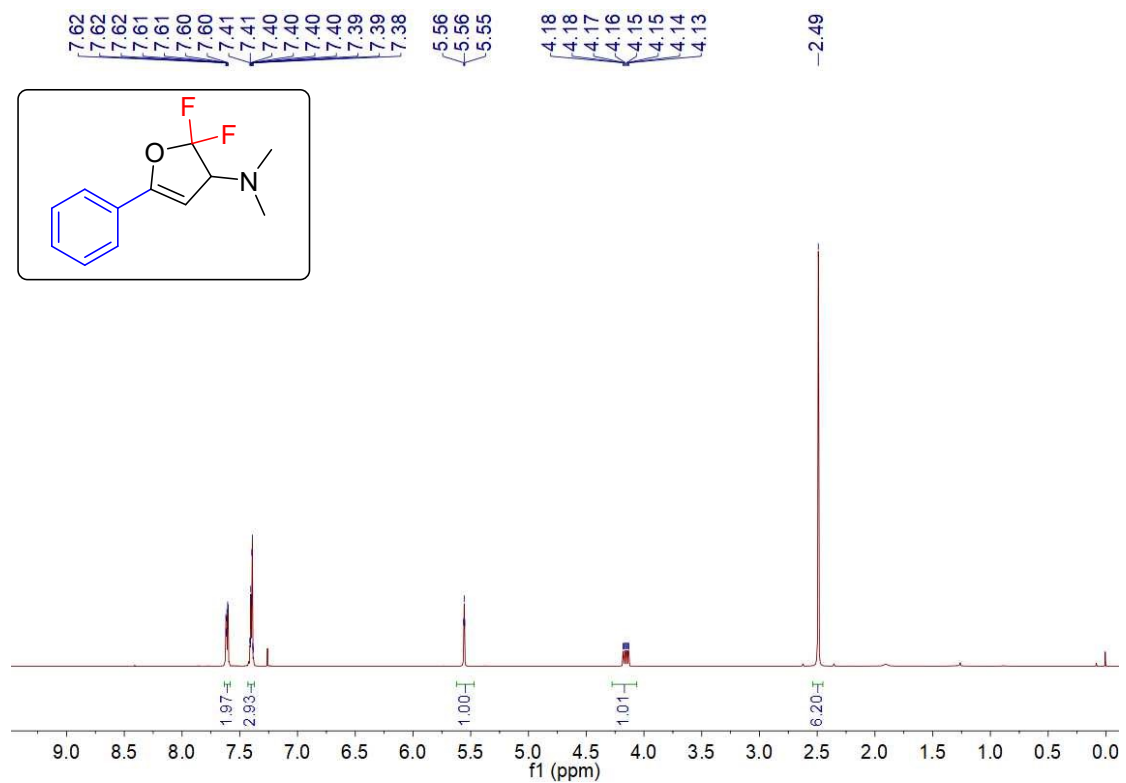

**<sup>13</sup>C spectrum (CDCl<sub>3</sub>) of 2,2-difluoro-N,N-dimethyl-5-phenyl-2,3-dihydrofuran-3-amine (4a)**

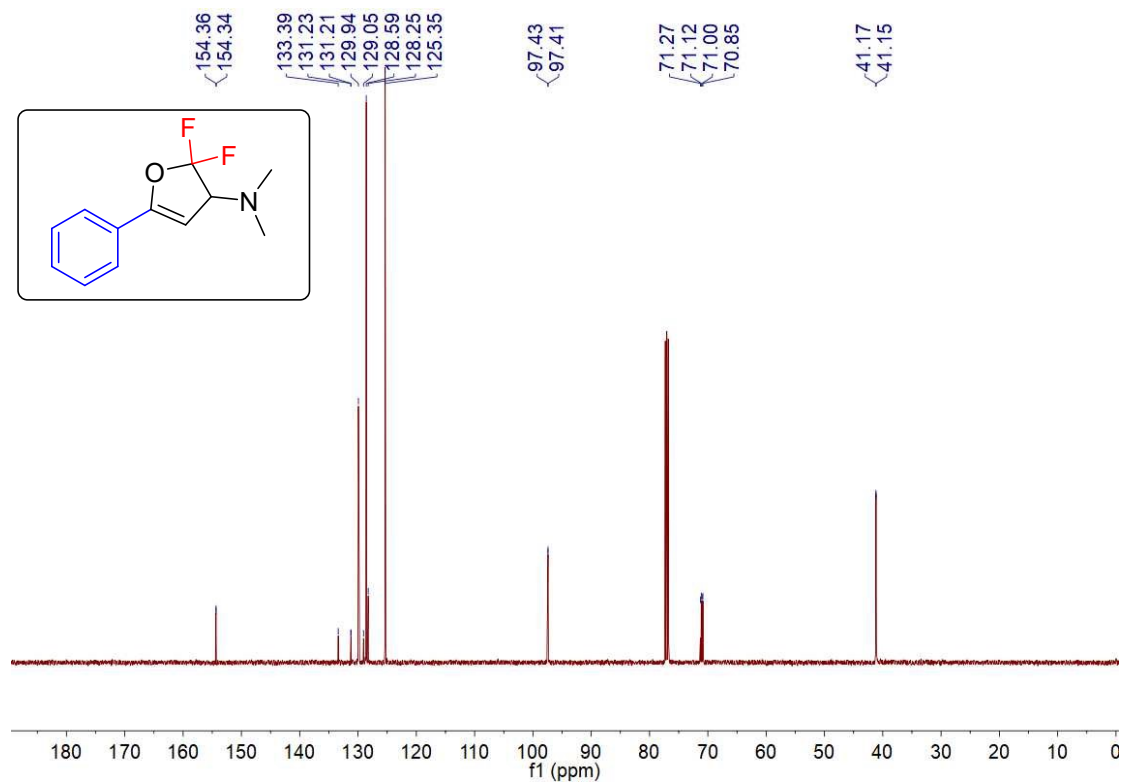

**<sup>19</sup>F spectrum (CDCl<sub>3</sub>) of 2,2-difluoro-N,N-dimethyl-5-phenyl-2,3-dihydrofuran-3-amine (4a)**

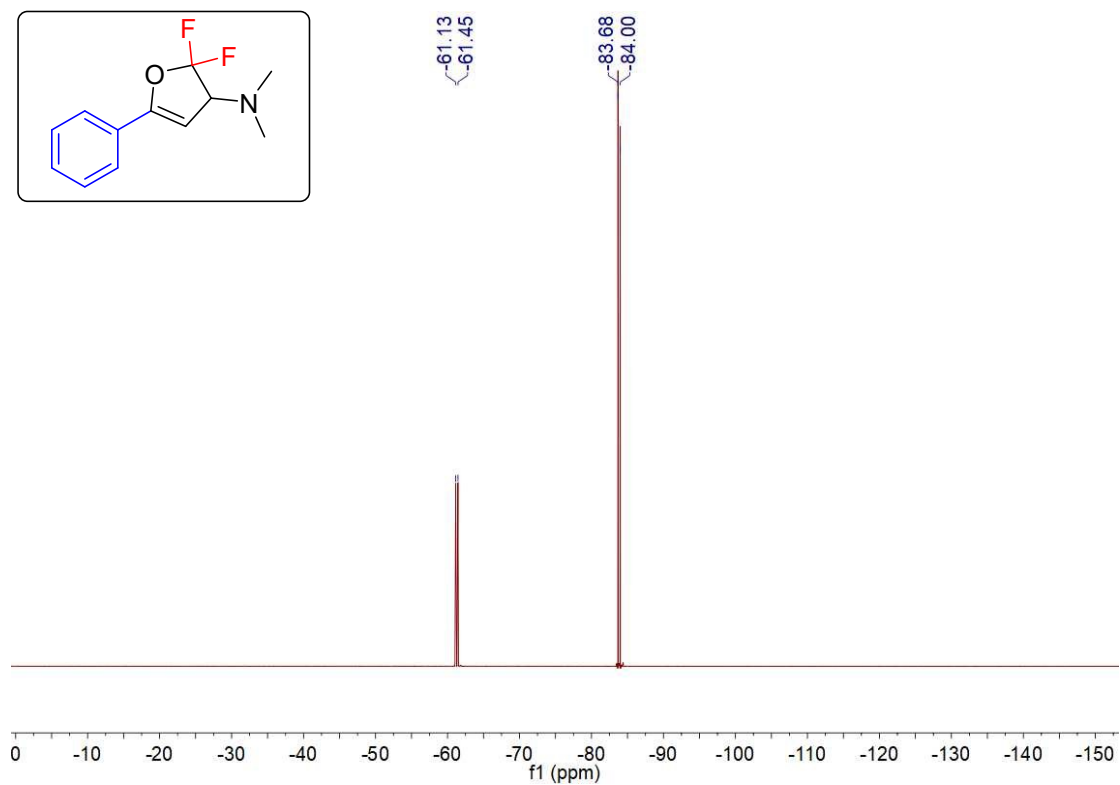

**<sup>1</sup>H spectrum (CDCl<sub>3</sub>) 2,2-difluoro-N,N-dimethyl-5-(o-tolyl)-2,3-dihydrofuran-3-amine (4b)**

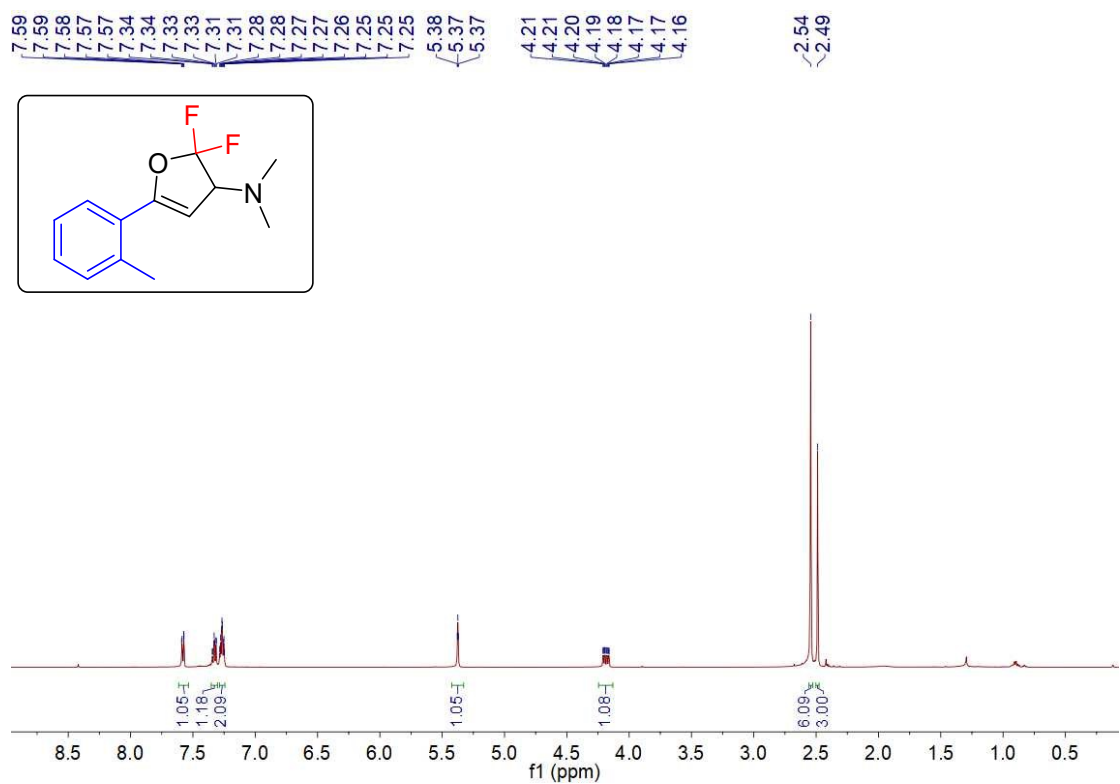

**<sup>13</sup>C spectrum (CDCl<sub>3</sub>) 2,2-difluoro-N,N-dimethyl-5-(o-tolyl)-2,3-dihydrofuran-3-amine (4b)**

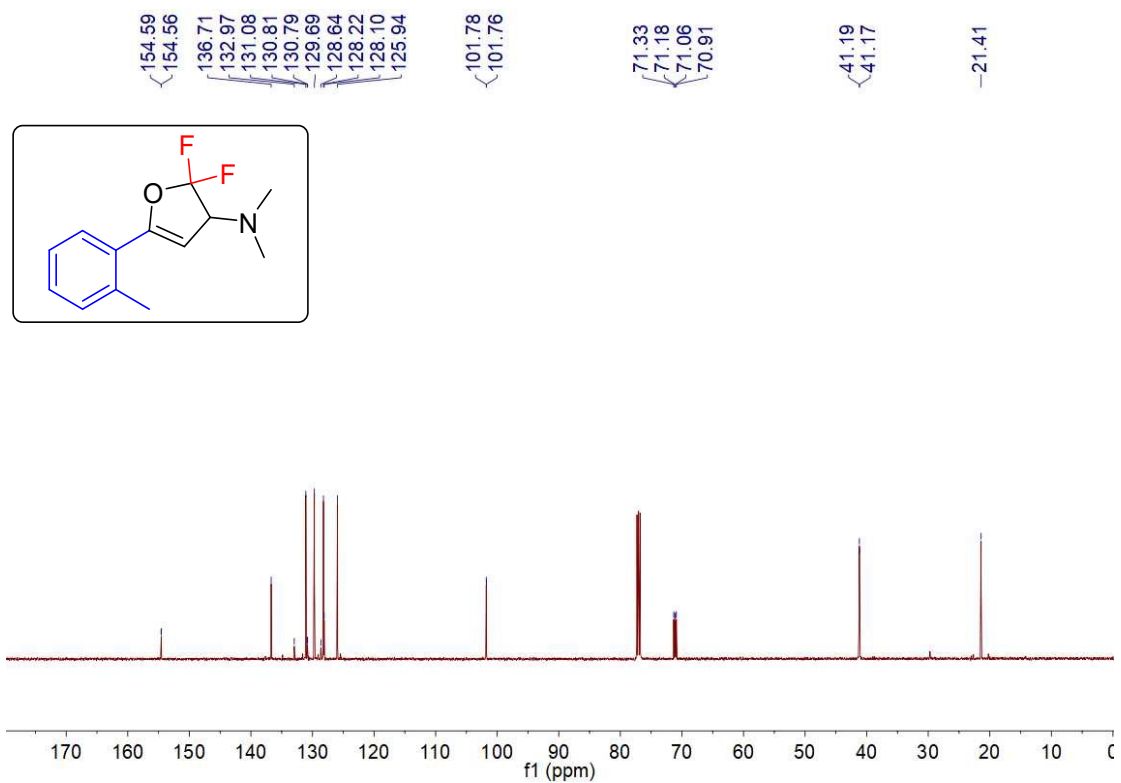

**<sup>19</sup>F spectrum (CDCl<sub>3</sub>) 2,2-difluoro-N,N-dimethyl-5-(o-tolyl)-2,3-dihydrofuran-3-amine (4b)**

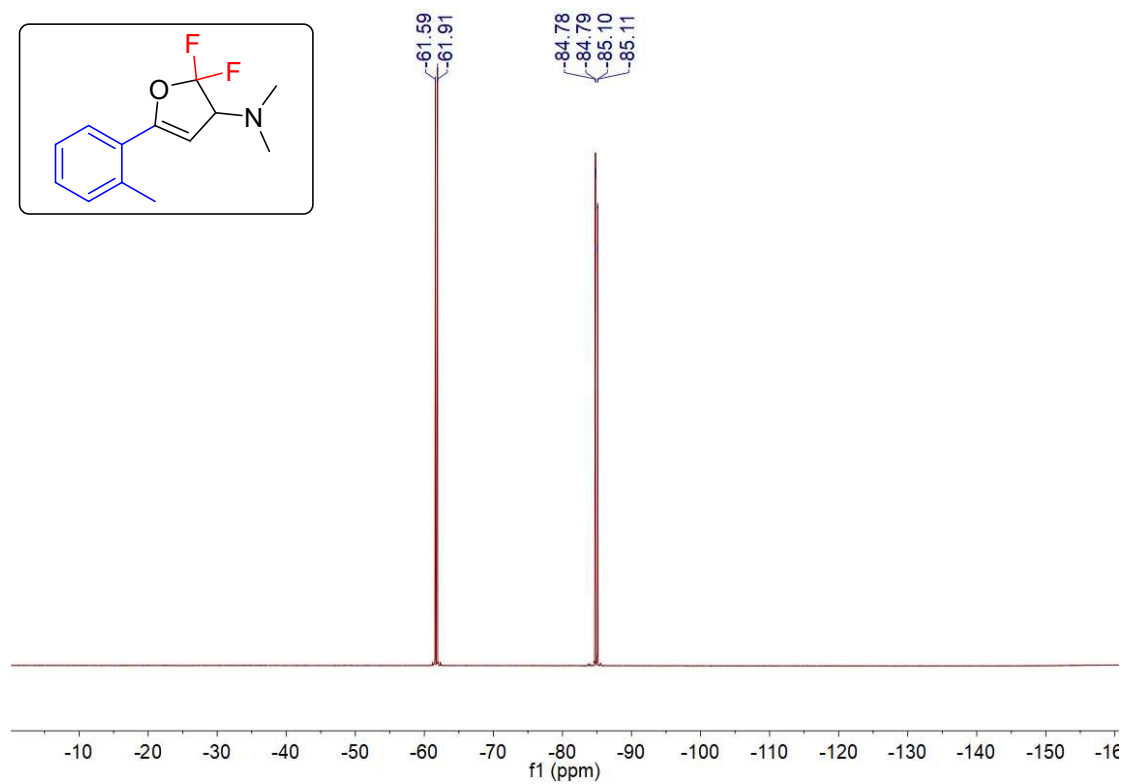

**<sup>1</sup>H spectrum (CDCl<sub>3</sub>) 2,2-difluoro-N,N-dimethyl-5-(m-tolyl)-2,3-dihydrofuran-3-amine (4c)**

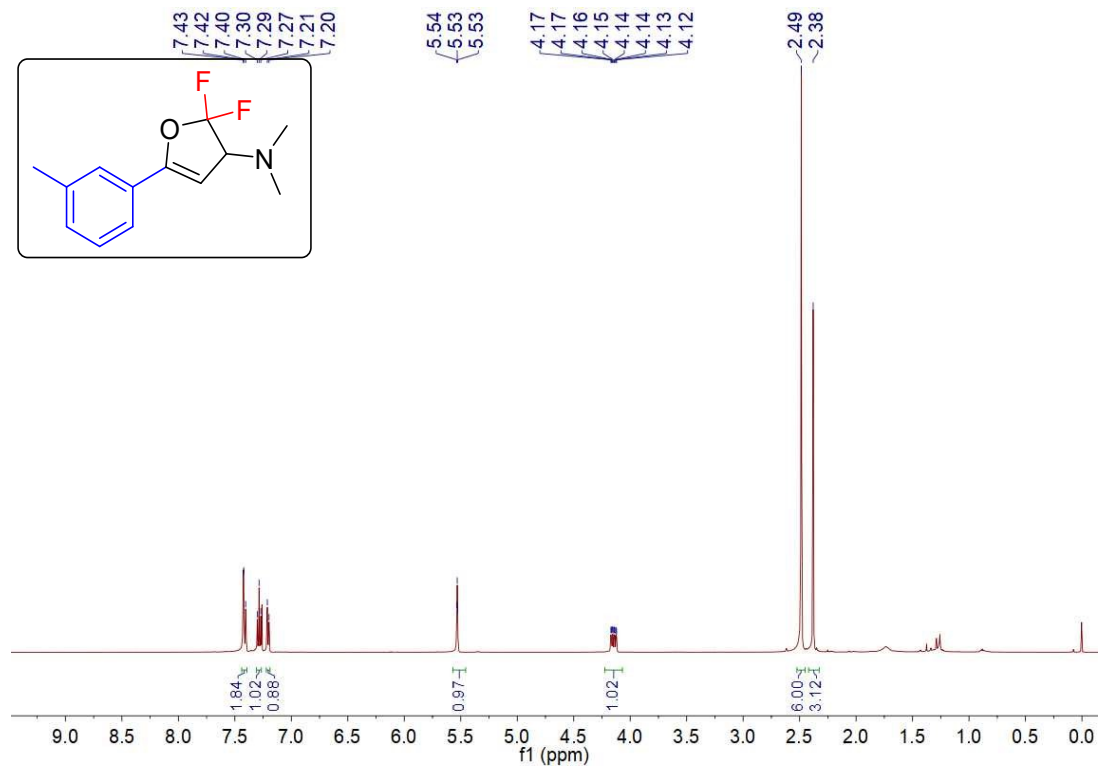

**<sup>13</sup>C spectrum (CDCl<sub>3</sub>) 2,2-difluoro-N,N-dimethyl-5-(m-tolyl)-2,3-dihydrofuran-3-amine (4c)**

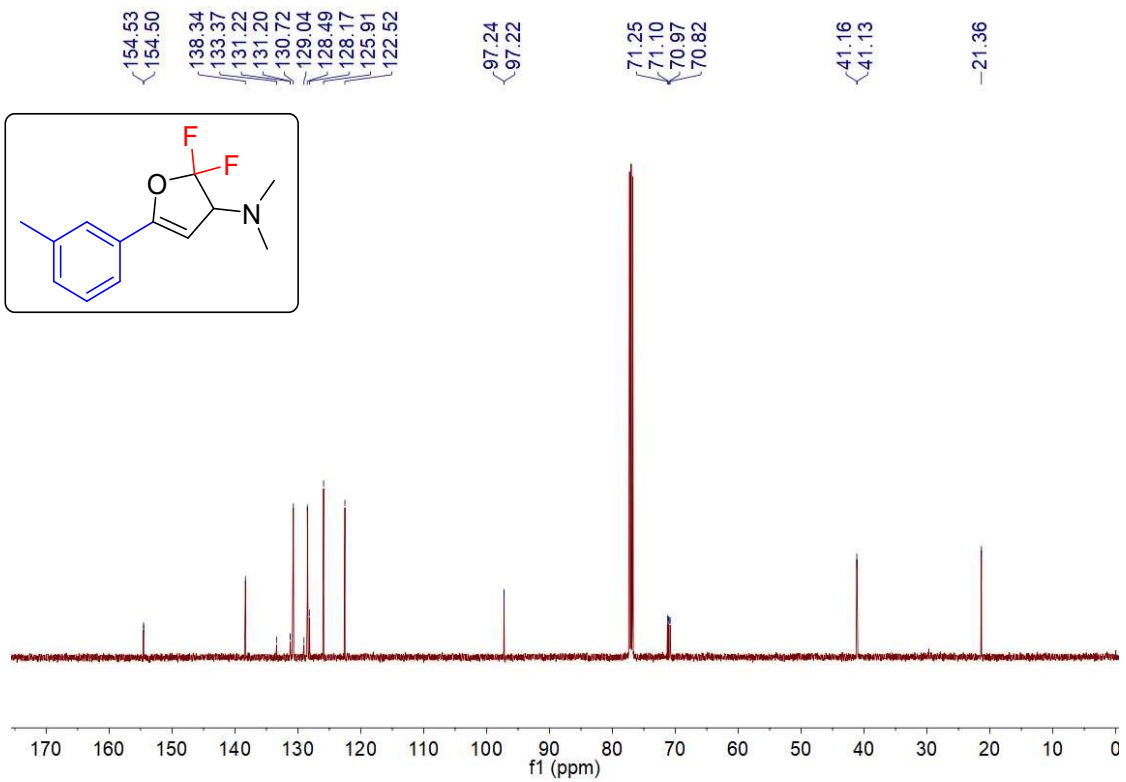

**$^{19}\text{F}$  spectrum ( $\text{CDCl}_3$ ) 2,2-difluoro-N, N-dimethyl-5-(m-tolyl)-2,3-dihydrofuran-3-amine (4c)**

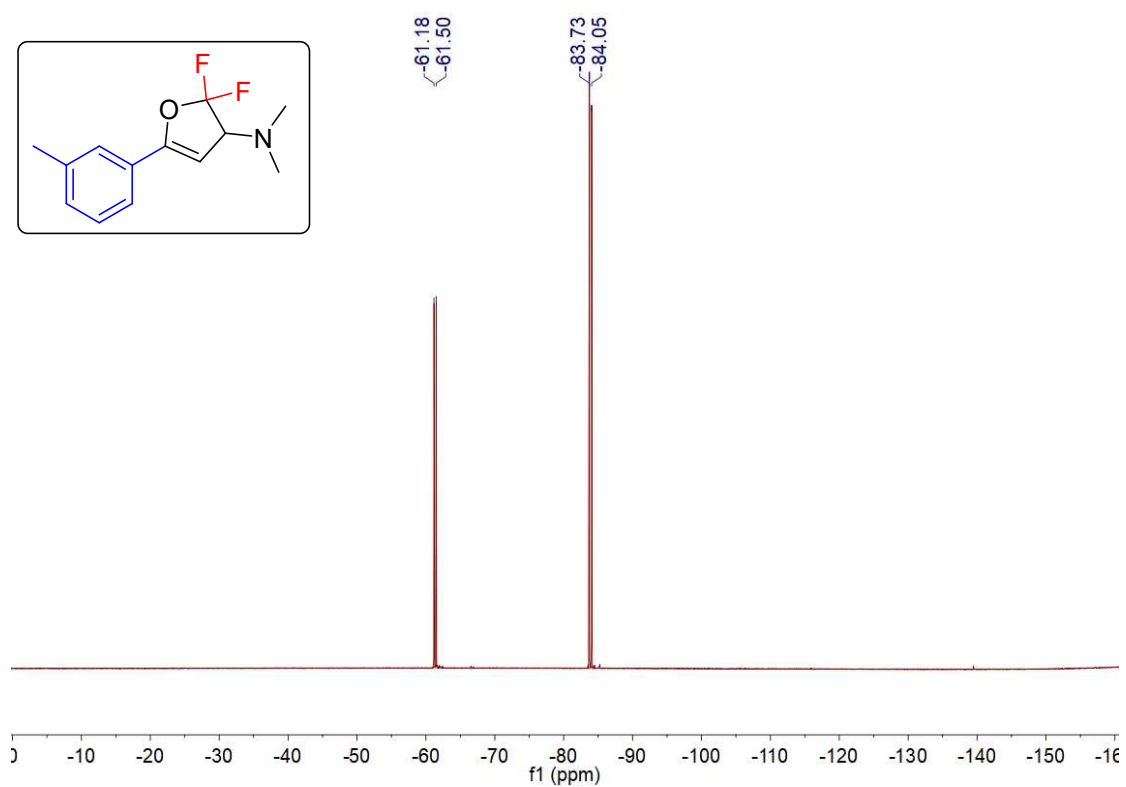

**$^1\text{H}$  spectrum ( $\text{CDCl}_3$ ) 2,2-difluoro-N, N-dimethyl-5-(p-tolyl)-2,3-dihydrofuran-3-amine (4d)**

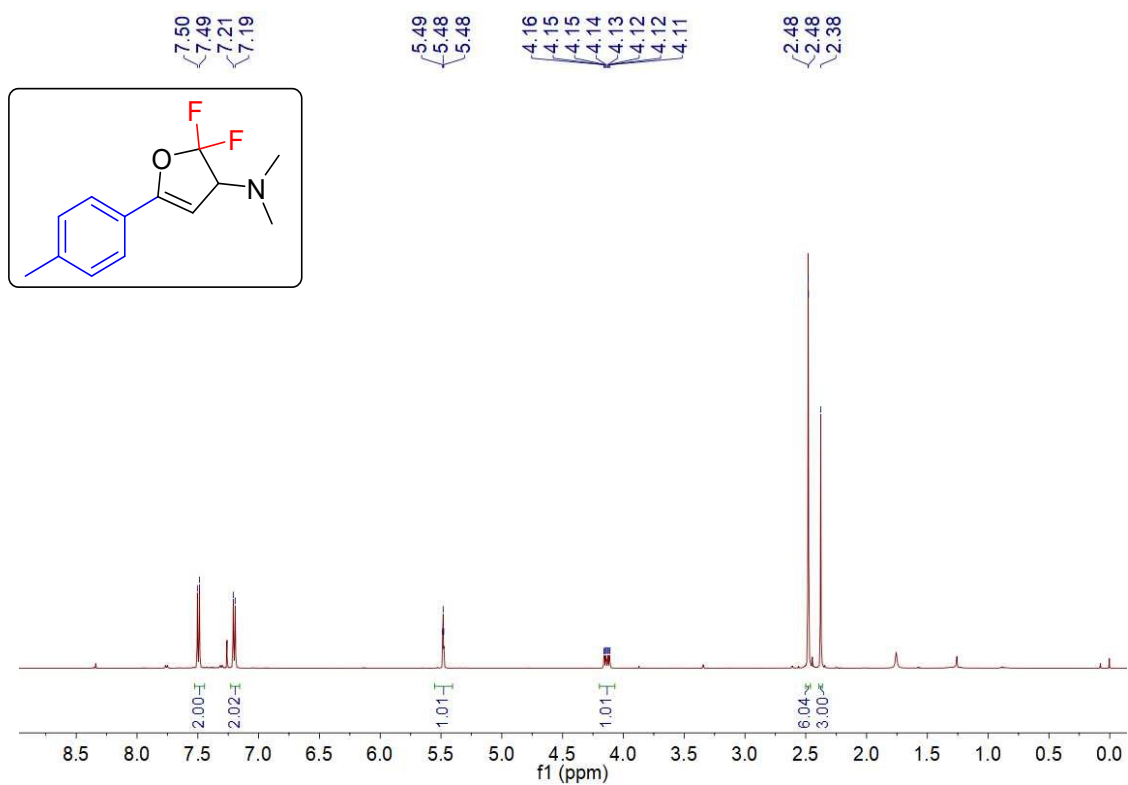

**$^{13}\text{C}$  spectrum ( $\text{CDCl}_3$ ) 2,2-difluoro-N, N-dimethyl-5-(p-tolyl)-2,3-dihydrofuran-3-amine (4d)**

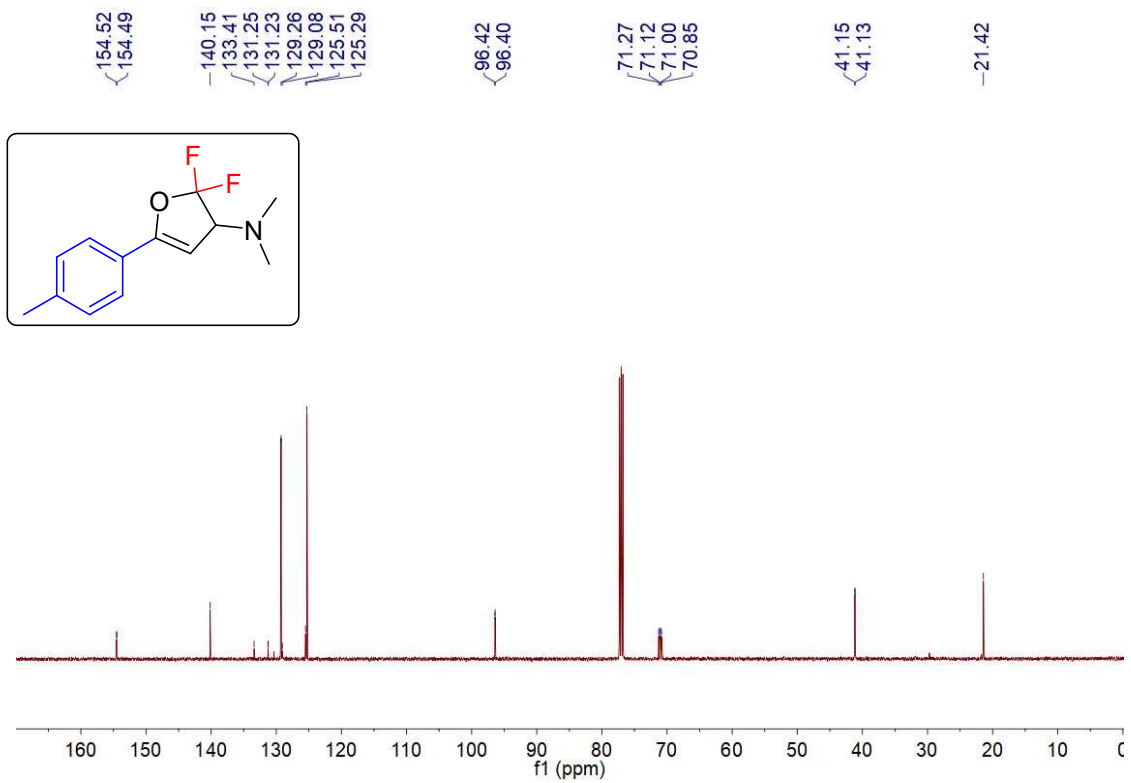

**<sup>19</sup>F spectrum (CDCl<sub>3</sub>) 2,2-difluoro-N, N-dimethyl-5-(p-tolyl)-2,3-dihydrofuran-3-amine (4d)**

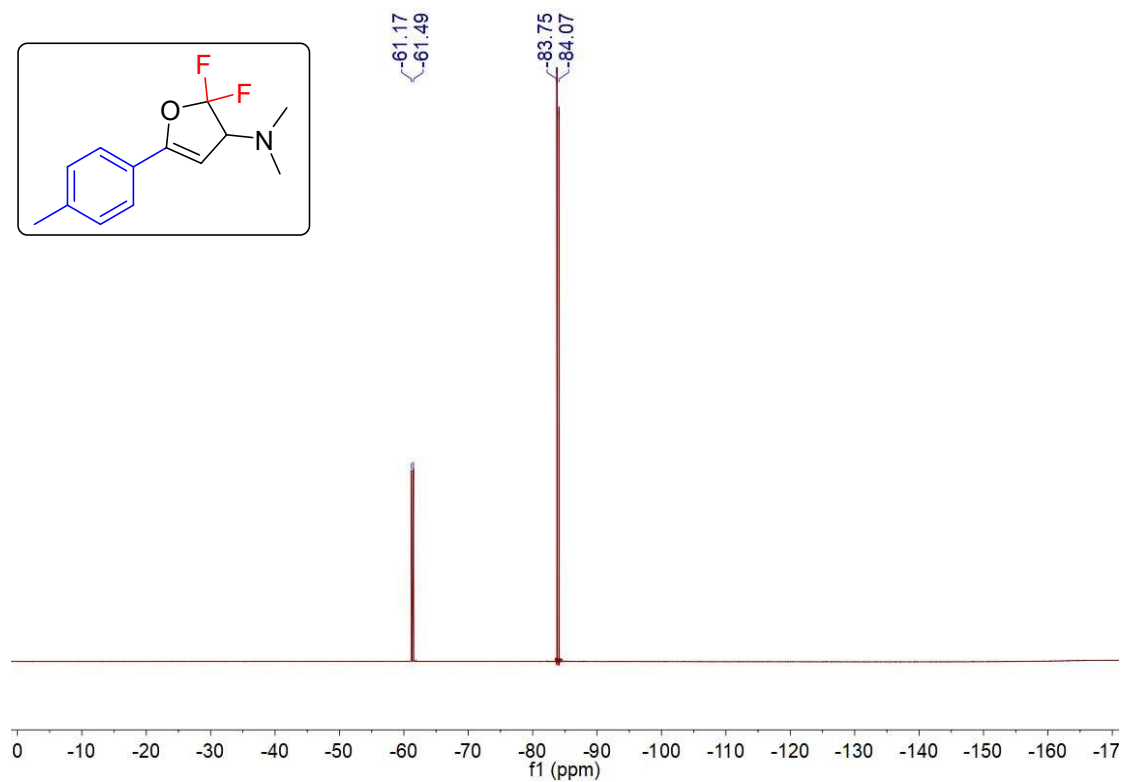

**<sup>1</sup>H spectrum (CDCl<sub>3</sub>) 2,2-difluoro-5-(4-methoxyphenyl)-N, N-dimethyl-2,3-dihydrofuran**

**-3-amine (4e)**

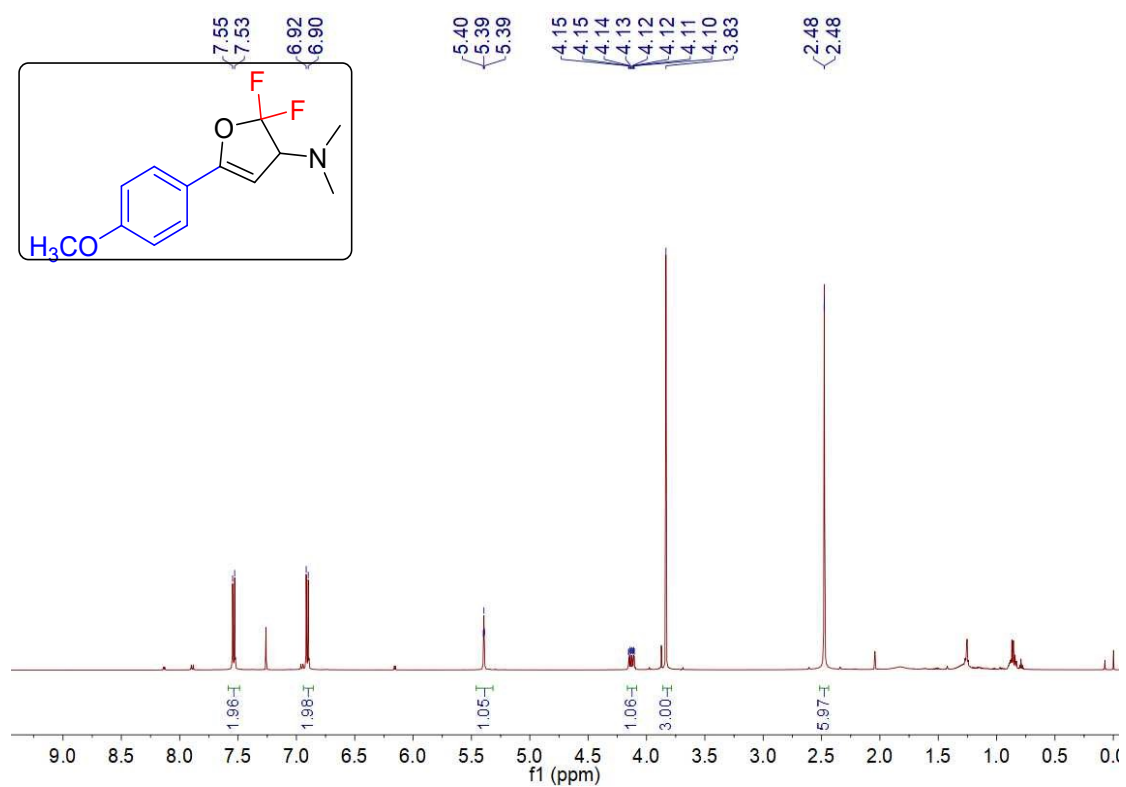

**<sup>13</sup>C spectrum (CDCl<sub>3</sub>) 2,2-difluoro-5-(4-methoxyphenyl)-N,N-dimethyl-2,3-dihydrofuran-3-amine (4e)**

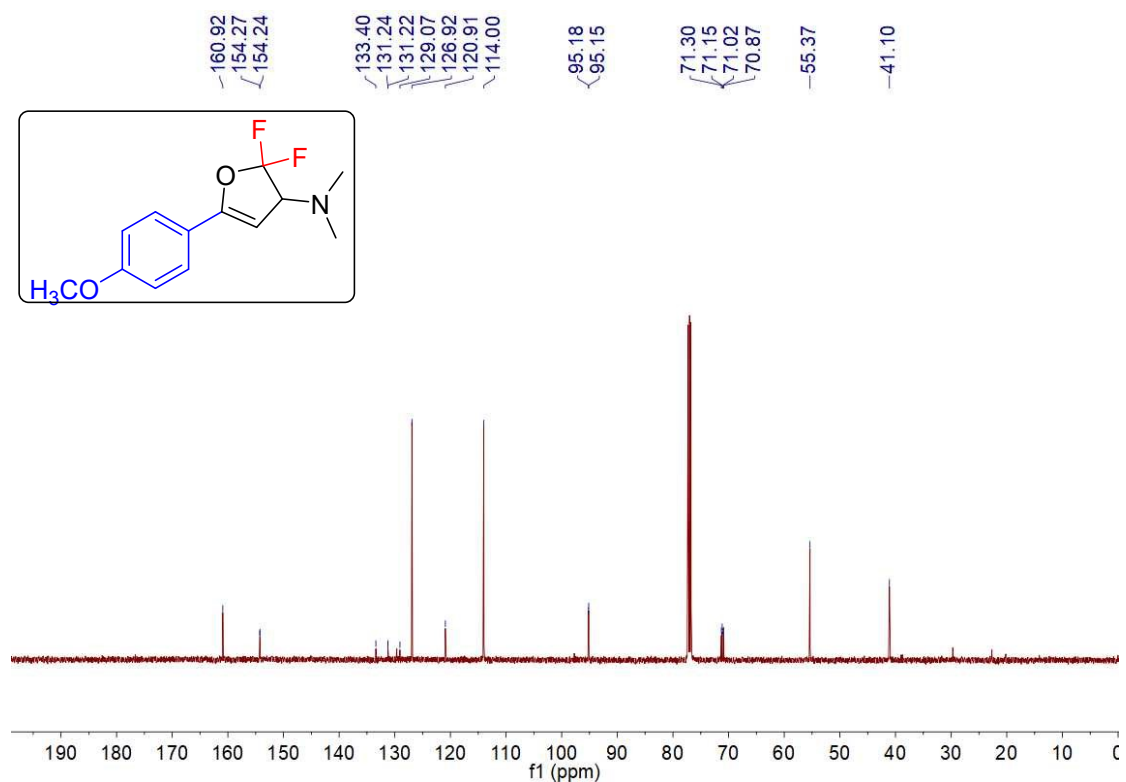

**<sup>19</sup>F spectrum (CDCl<sub>3</sub>) 2,2-difluoro-5-(4-methoxyphenyl)-N,N-dimethyl-2,3-dihydrofuran-3-amine (4e)**



**-3-amine (4e)**

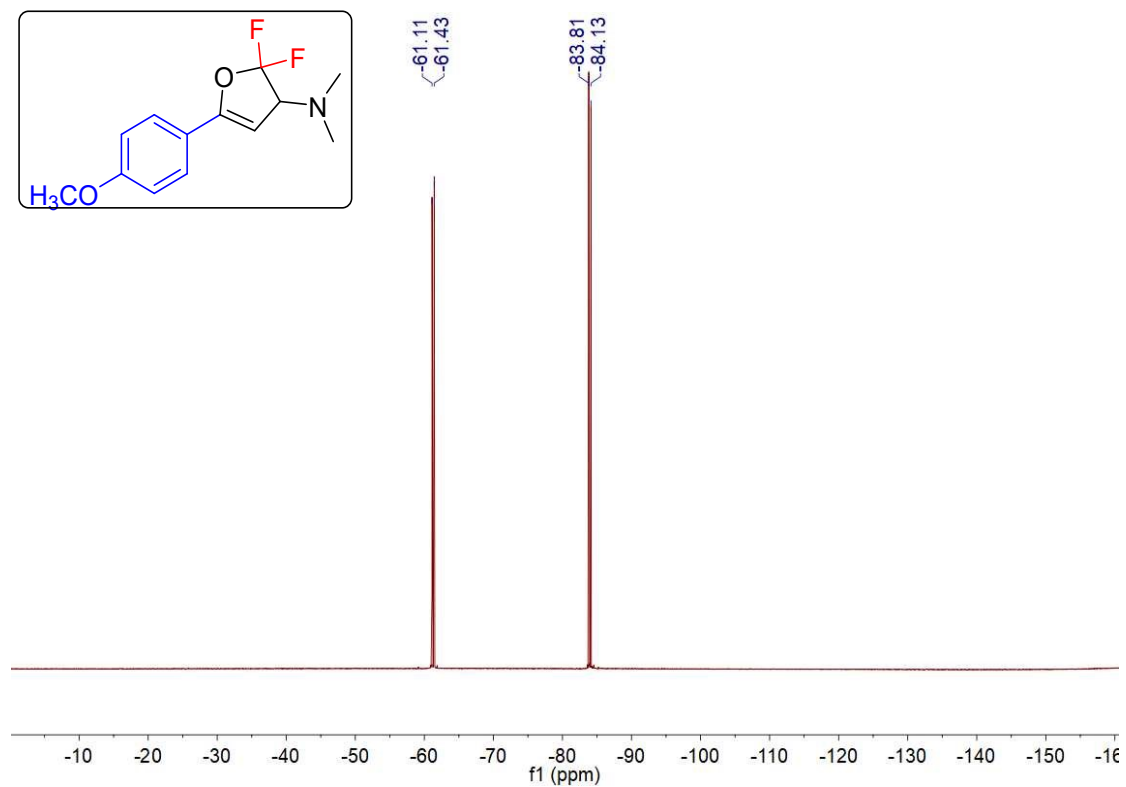

**<sup>1</sup>H spectrum (CDCl<sub>3</sub>) 2,2-difluoro-N,N-dimethyl-5-(4-(trifluoromethoxy)phenyl)-2,3-dihydrofuran-3-amine (4f)**

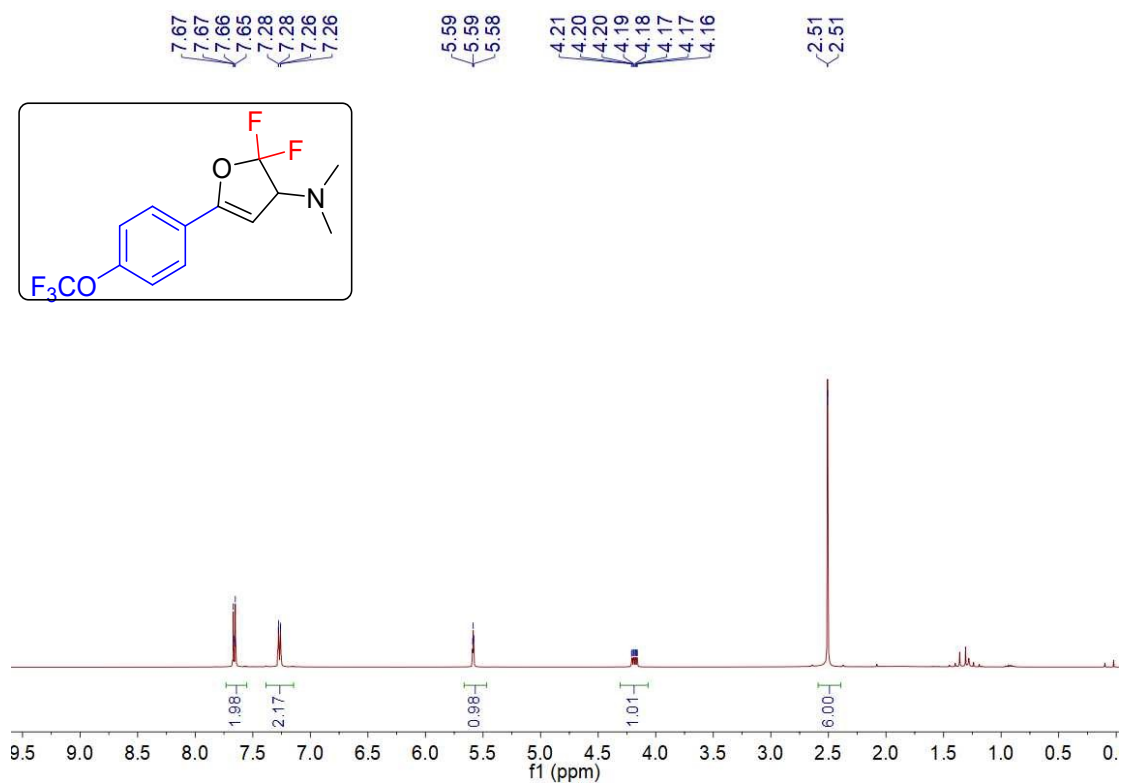

**<sup>13</sup>C spectrum (CDCl<sub>3</sub>) 2,2-difluoro-N,N-dimethyl-5-(4-(trifluoromethoxy)phenyl)-2,3-dihydrofuran-3-amine (4f)**

**-2,3-dihydrofuran-3-amine (4f)**

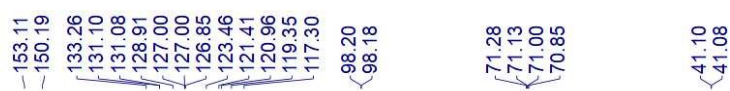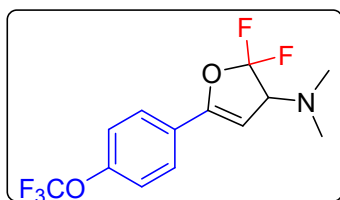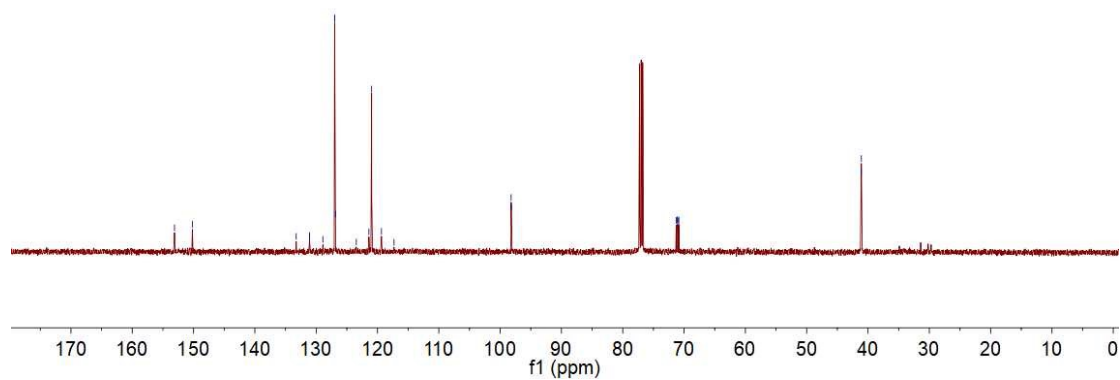

**$^{19}\text{F}$  spectrum (CDCl<sub>3</sub>) 2,2-difluoro-N, N-dimethyl-5-(4-(trifluoromethoxy)phenyl)**

**-2,3-dihydrofuran-3-amine (4f)**

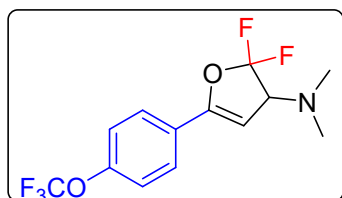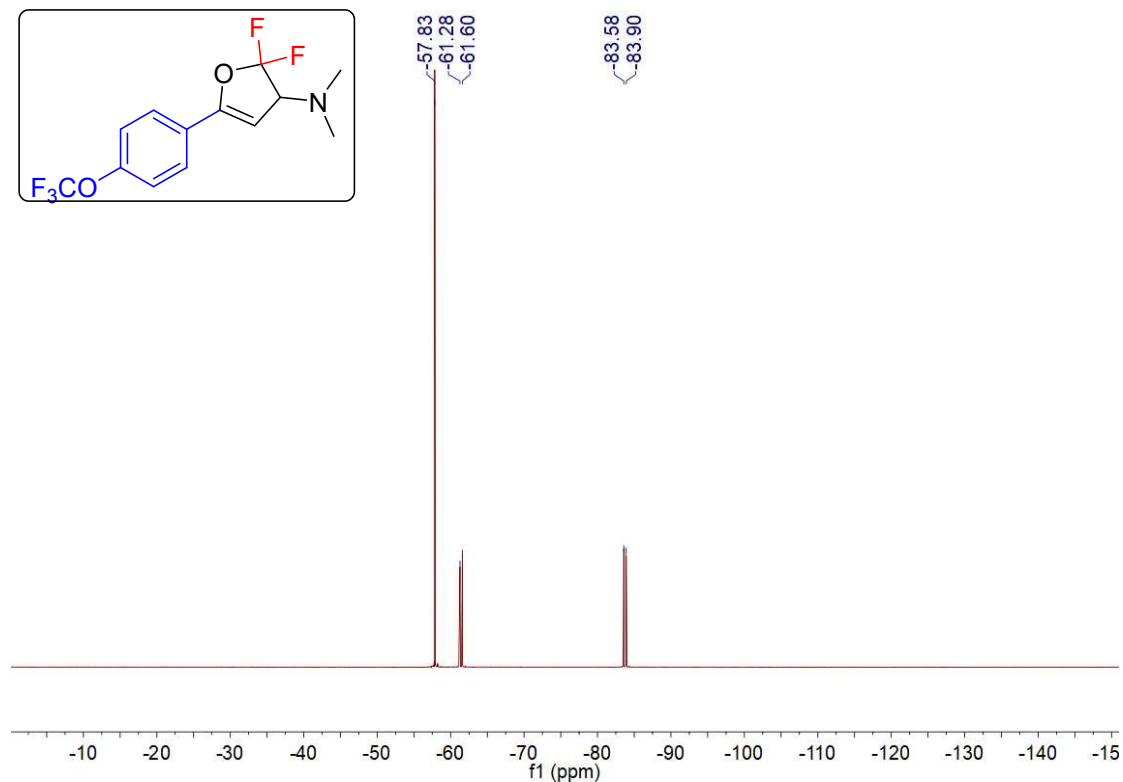

**$^1\text{H}$  spectrum (CDCl<sub>3</sub>) 2,2-difluoro-N, N-dimethyl-5-(4-(methylthio)phenyl)**

**-2,3-dihydrofuran-3-amine (4g)**

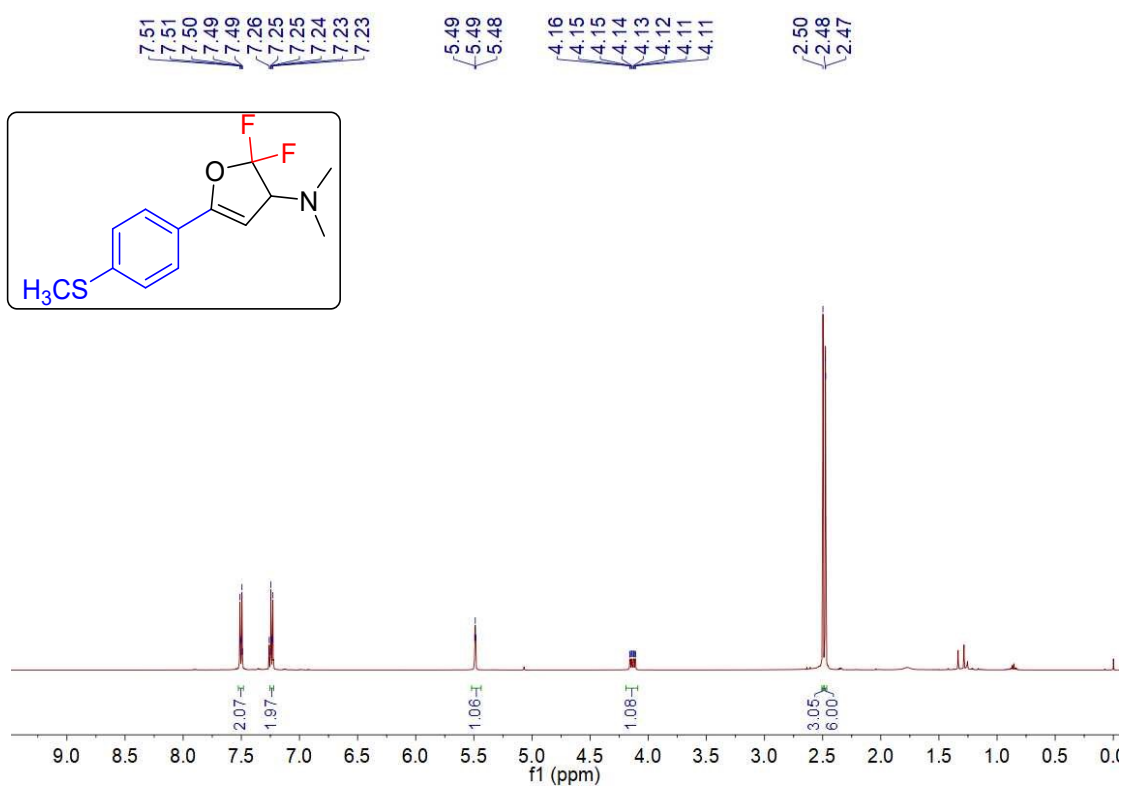

**<sup>13</sup>C spectrum (CDCl<sub>3</sub>) 2,2-difluoro-N, N-dimethyl-5-(4-(methylthio)phenyl)**

**-2,3-dihydrofuran-3-amine (4g)**

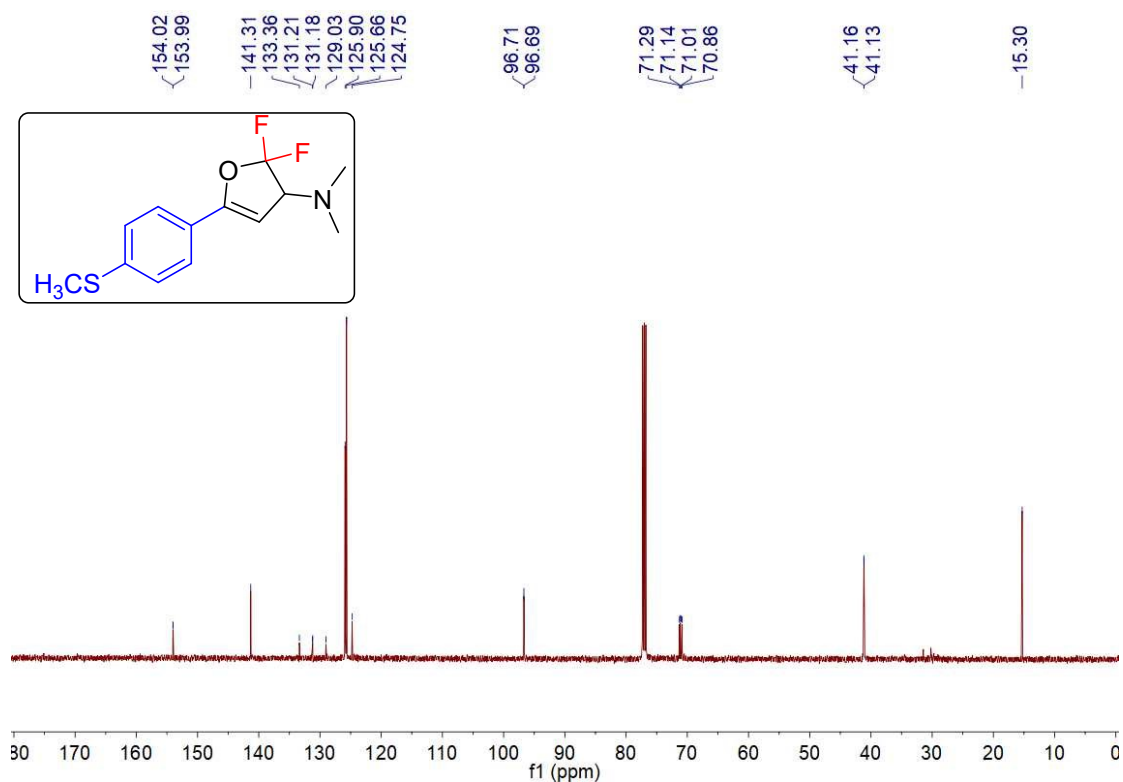

**<sup>19</sup>F spectrum (CDCl<sub>3</sub>) 2,2-difluoro-N, N-dimethyl-5-(4-(methylthio)phenyl)**

**-2,3-dihydrofuran-3-amine (4g)**

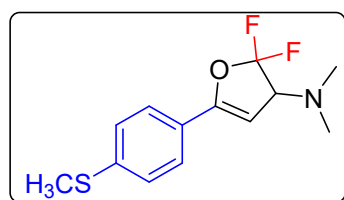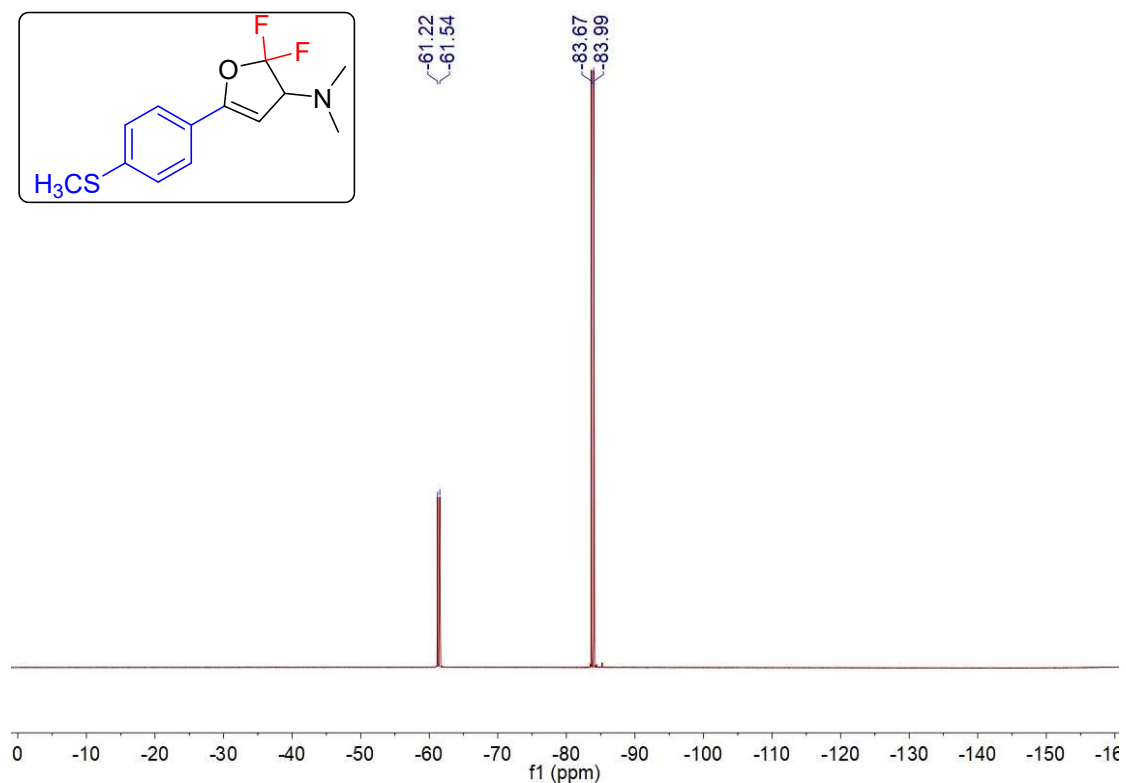

**<sup>1</sup>H spectrum (CDCl<sub>3</sub>) 5-([1,1'-biphenyl]-4-yl)-2,2-difluoro-N,N-dimethyl-2,3-dihydrofuran-3-amine (4h)**

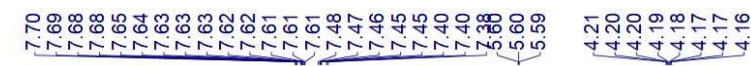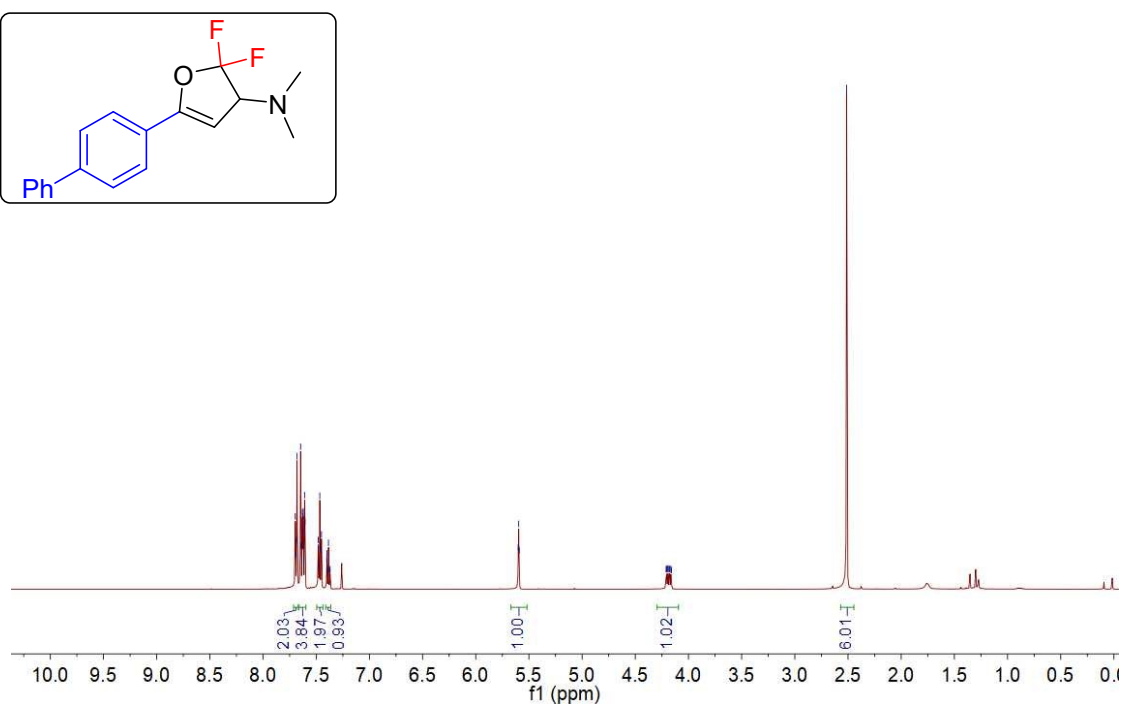

**<sup>13</sup>C spectrum (CDCl<sub>3</sub>) 5-([1,1'-biphenyl]-4-yl)-2,2-difluoro-N,N-dimethyl-2,3-dihydrofuran-3-amine (4h)**

**n-3-amine (4h)**

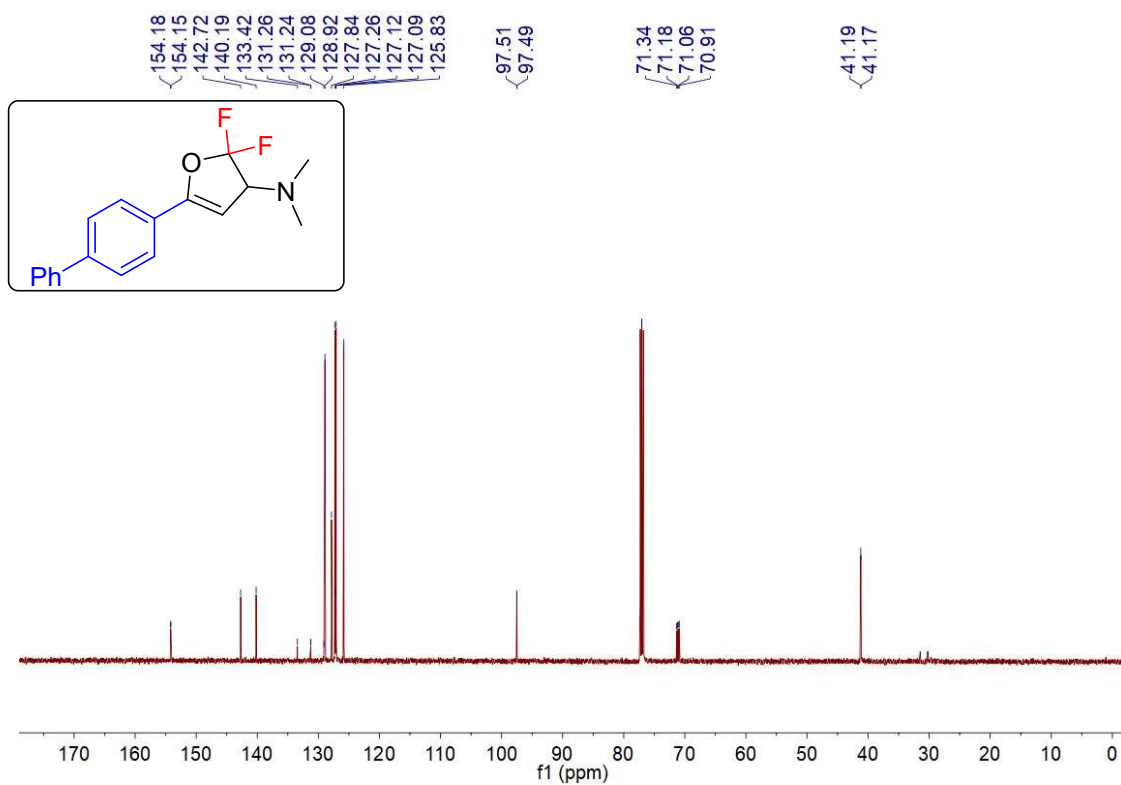

**<sup>19</sup>F spectrum (CDCl<sub>3</sub>)5-([1,1'-biphenyl]-4-yl)-2,2-difluoro-N, N-dimethyl-2,3-dihydrofura  
n-3-amine (4h)**

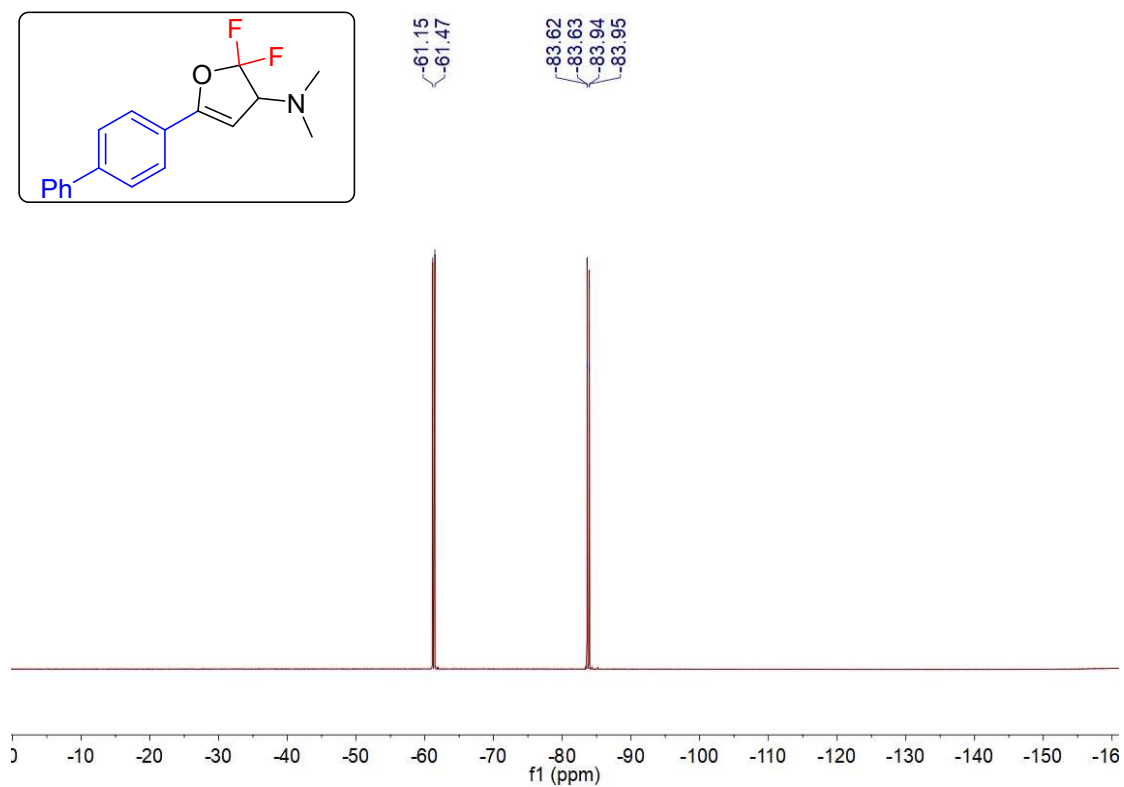

**<sup>1</sup>H spectrum (CDCl<sub>3</sub>) 2,2-difluoro-N, N-dimethyl-5-(naphthalen-2-yl)-2,3-dihydrofuran-3-amine (4i)**

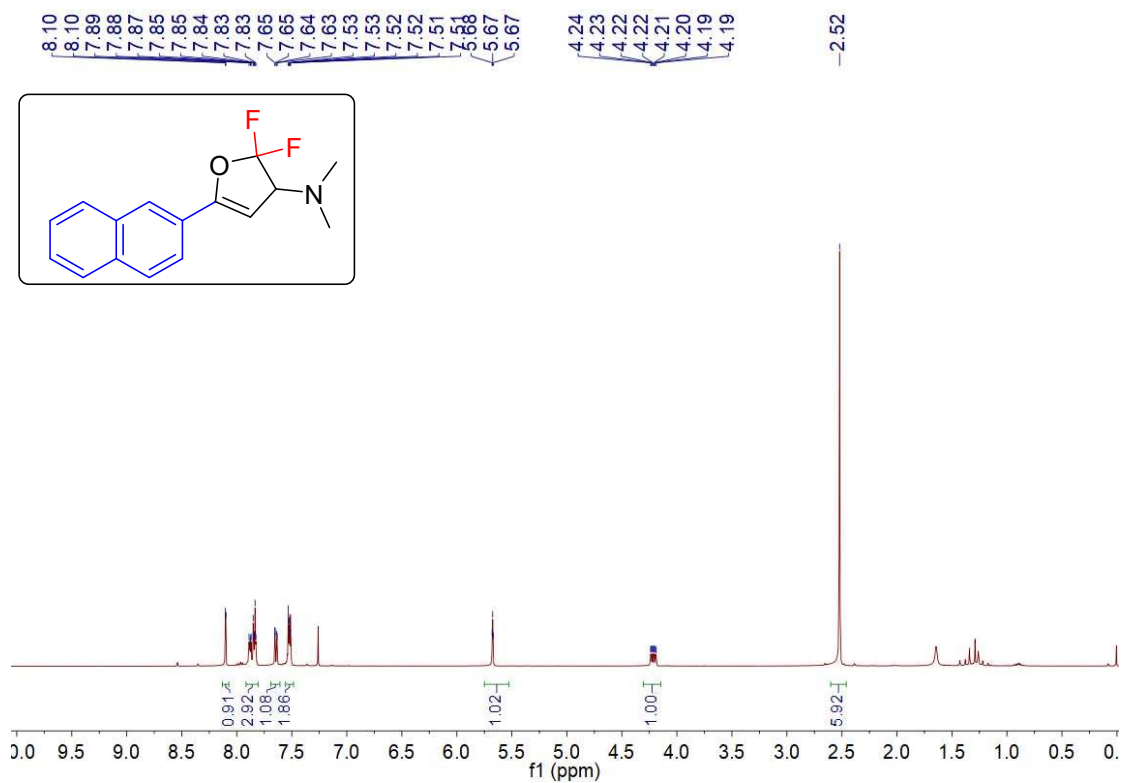

**<sup>13</sup>C spectrum (CDCl<sub>3</sub>) 2,2-difluoro-N, N-dimethyl-5-(naphthalen-2-yl)-2,3-dihydrofuran-3-amine (4i)**

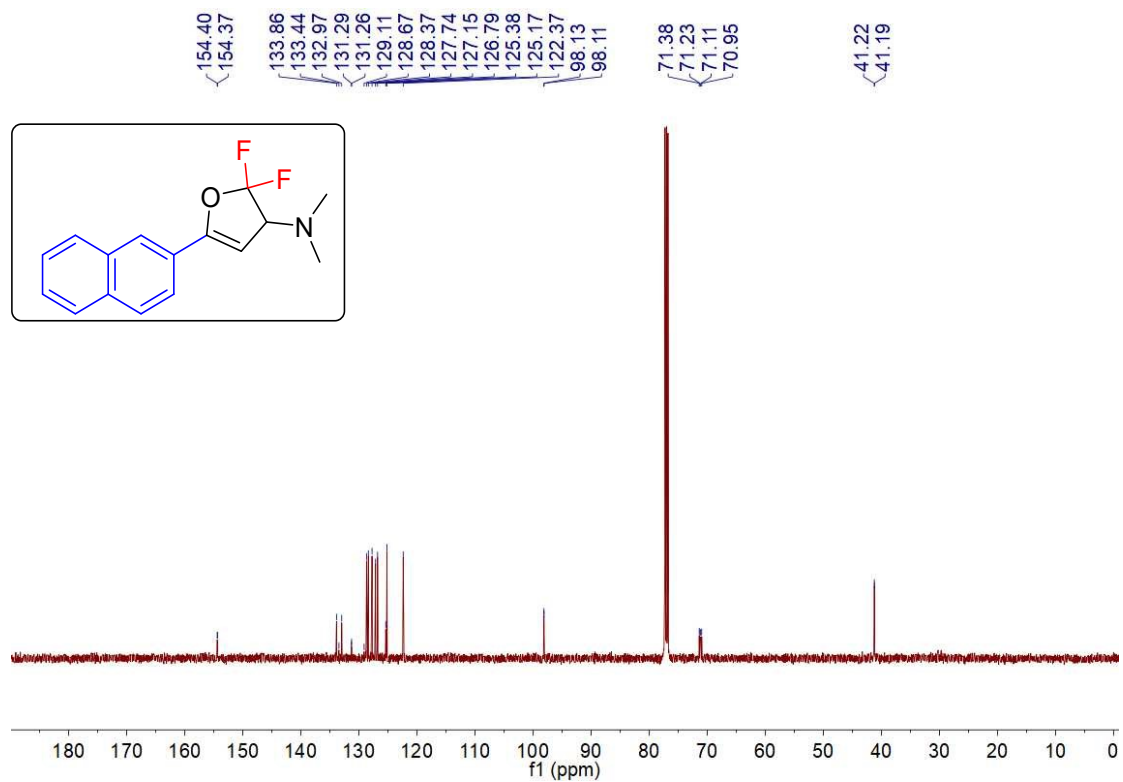

**$^{19}\text{F}$  spectrum ( $\text{CDCl}_3$ ) 2,2-difluoro-N, N-dimethyl-5-(naphthalen-2-yl)-2,3-dihydrofuran-3-amine (4i)**

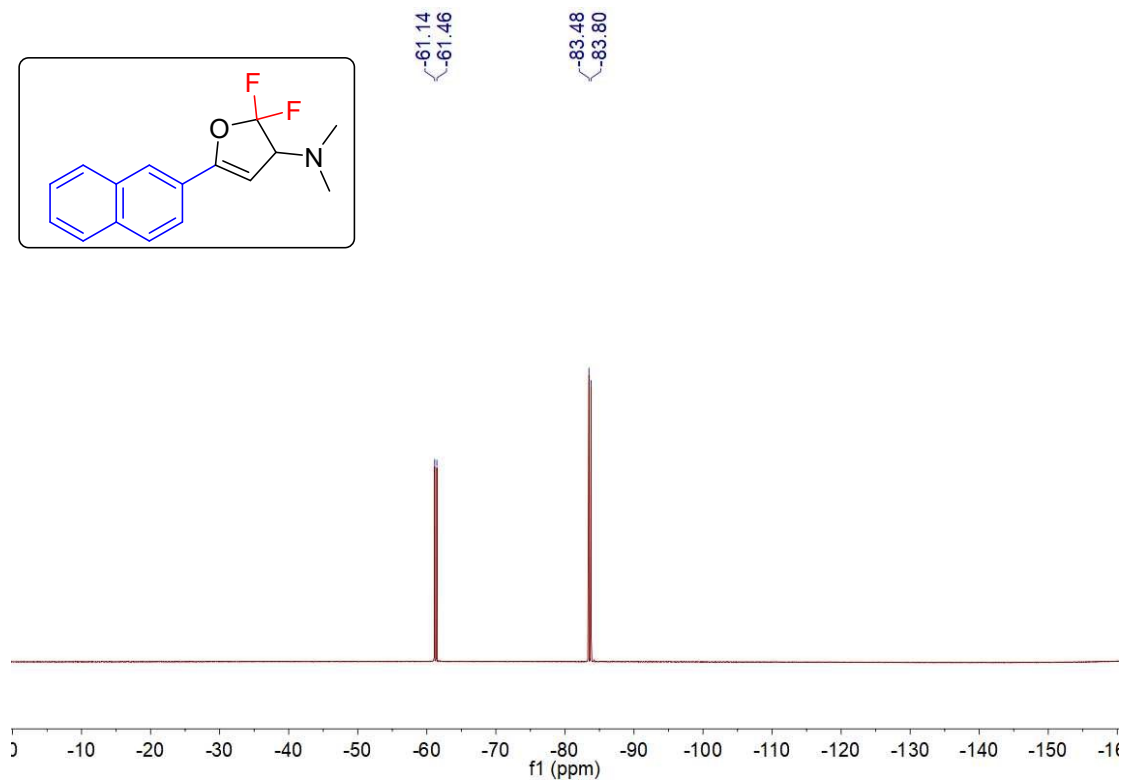

**$^1\text{H}$  spectrum ( $\text{CDCl}_3$ ) 2,2-difluoro-5-(4-fluorophenyl)-N, N-dimethyl-2,3-dihydrofuran-3-amine (4j)**

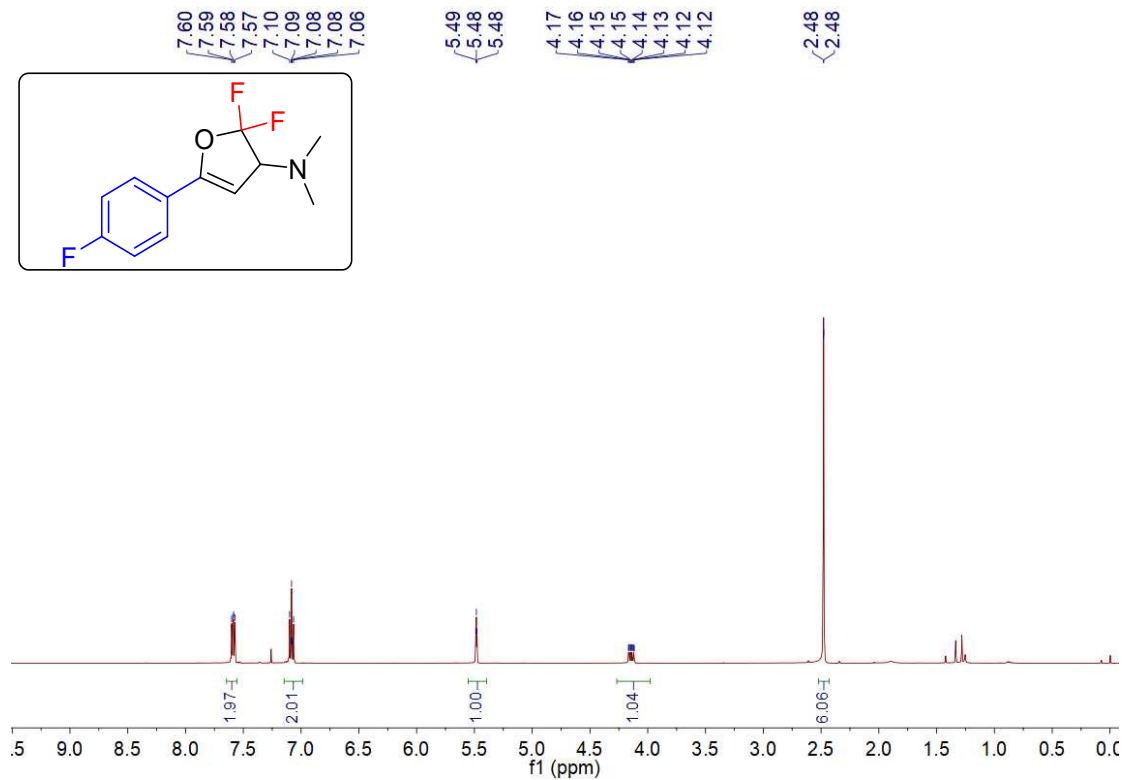

**$^{13}\text{C}$  spectrum ( $\text{CDCl}_3$ ) 2,2-difluoro-5-(4-fluorophenyl)-N, N-dimethyl-2,3-dihydrofuran-3-amine**

(4j)

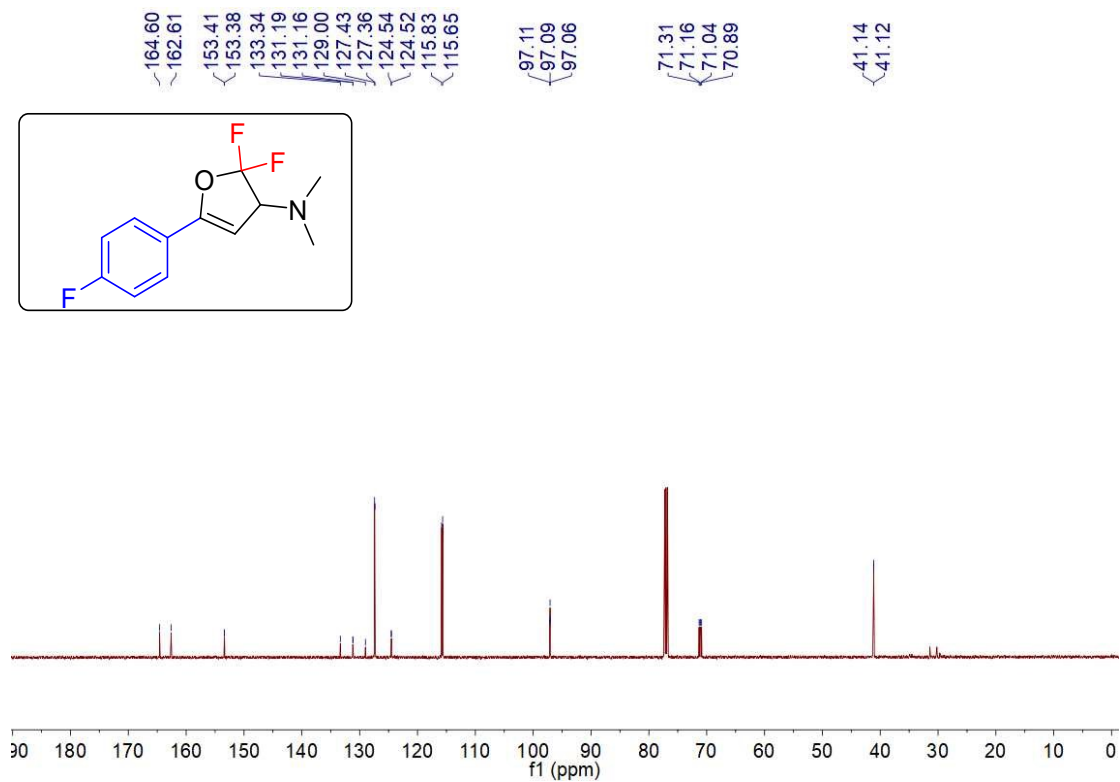

<sup>19</sup>F spectrum (CDCl<sub>3</sub>) 2,2-difluoro-5-(4-fluorophenyl)-N,N-dimethyl-2,3-dihydrofuran-3-amine

(4j)

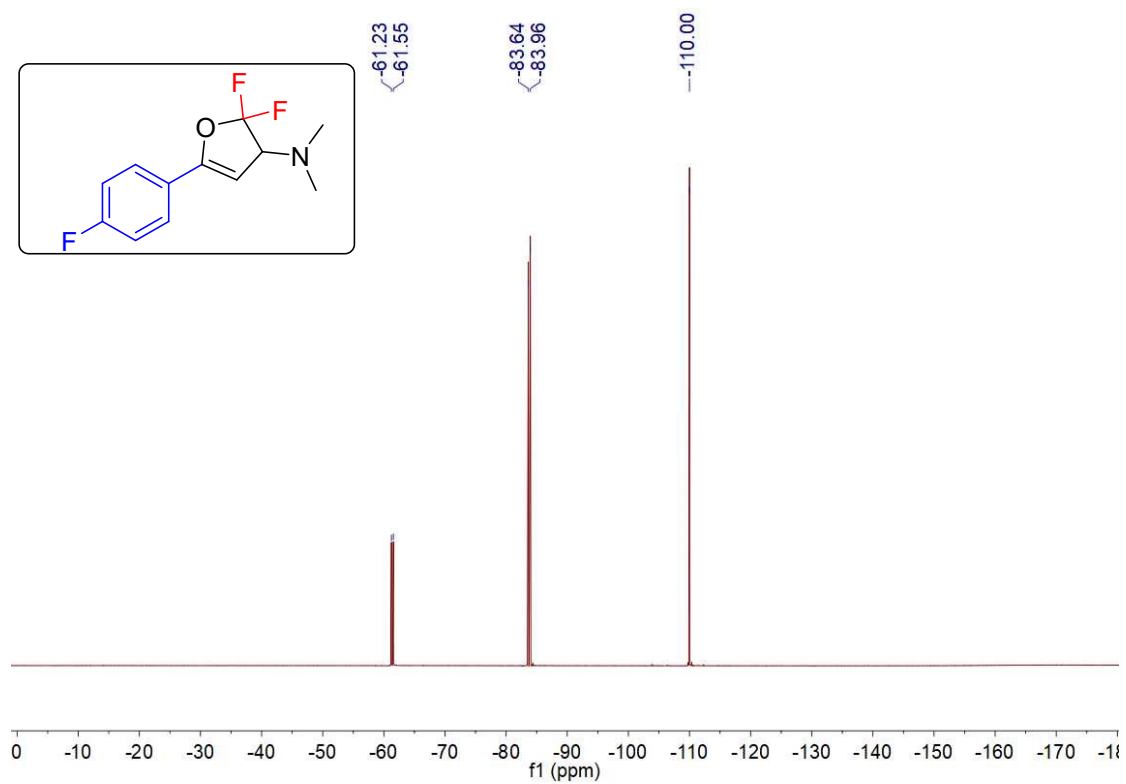

<sup>1</sup>H spectrum (CDCl<sub>3</sub>) 5-(4-fluorophenyl)-2,2-difluoro-N,N-dimethyl-2,3-dihydrofuran



**n-3-amine(4k)**

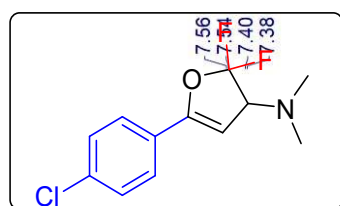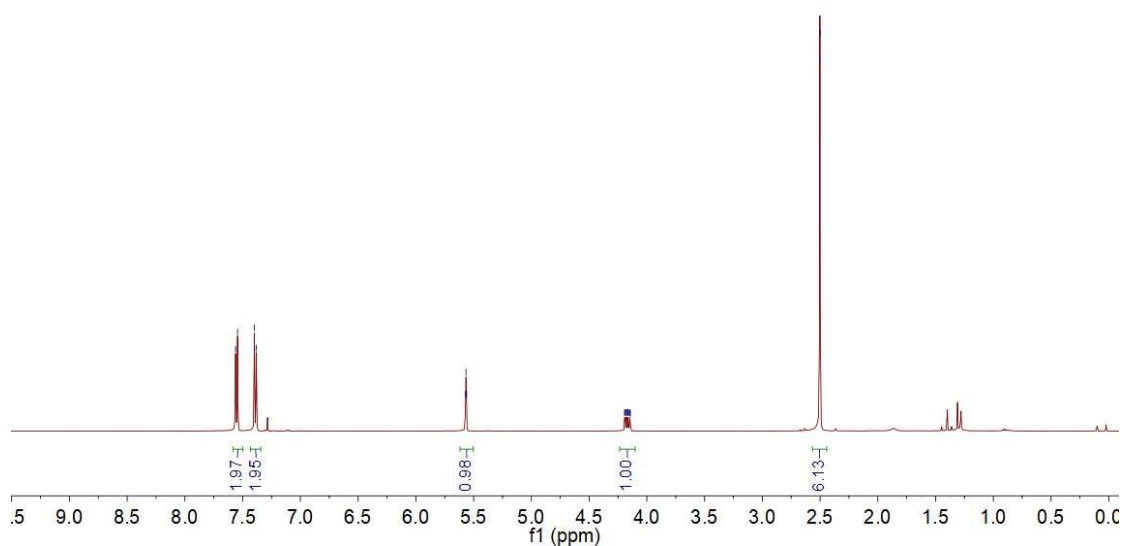

**$^{13}\text{C}$  spectrum (CDCl<sub>3</sub>) 5-(4-chlorophenyl)-2,2-difluoro-N, N-dimethyl-2,3-dihydrofura**

**n-3-amine(4k)**

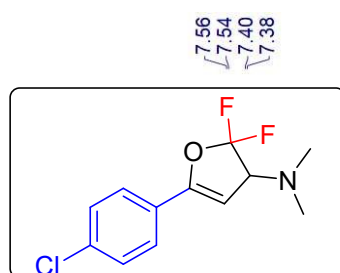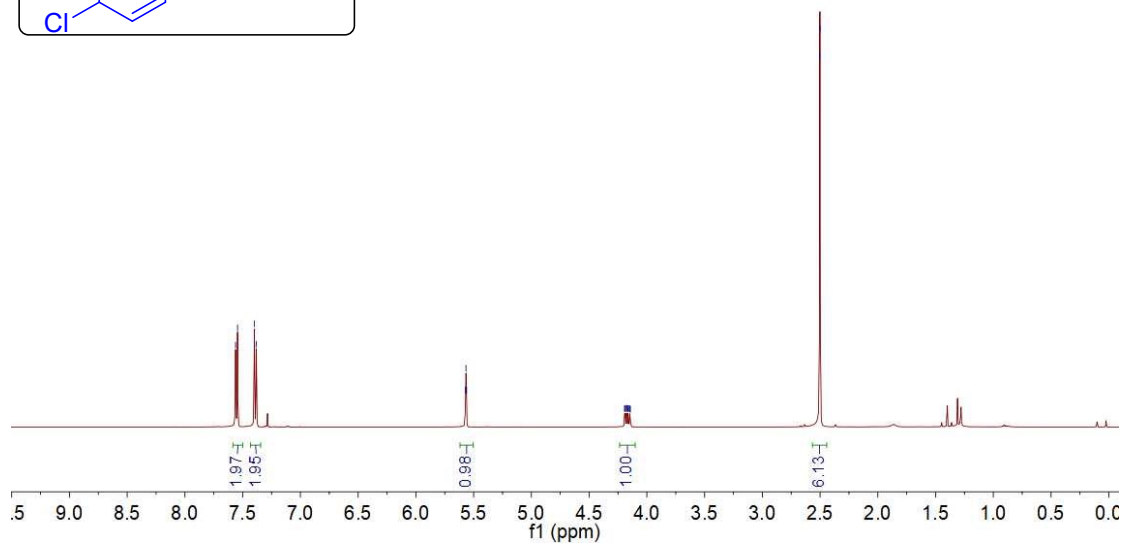

**$^{19}\text{F}$  spectrum (CDCl<sub>3</sub>) 5-(4-chlorophenyl)-2,2-difluoro-N, N-dimethyl-2,3-dihydrofura**

n-3-amine(4k)

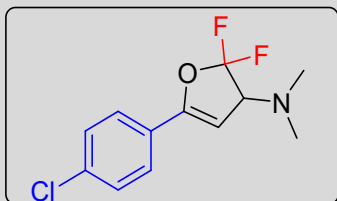

<sup>1</sup>H spectrum (CDCl<sub>3</sub>) 5-(4-bromophenyl)-2,2-difluoro-N,N-dimethyl-2,3-dihydrofuran n-3-amine(4l)

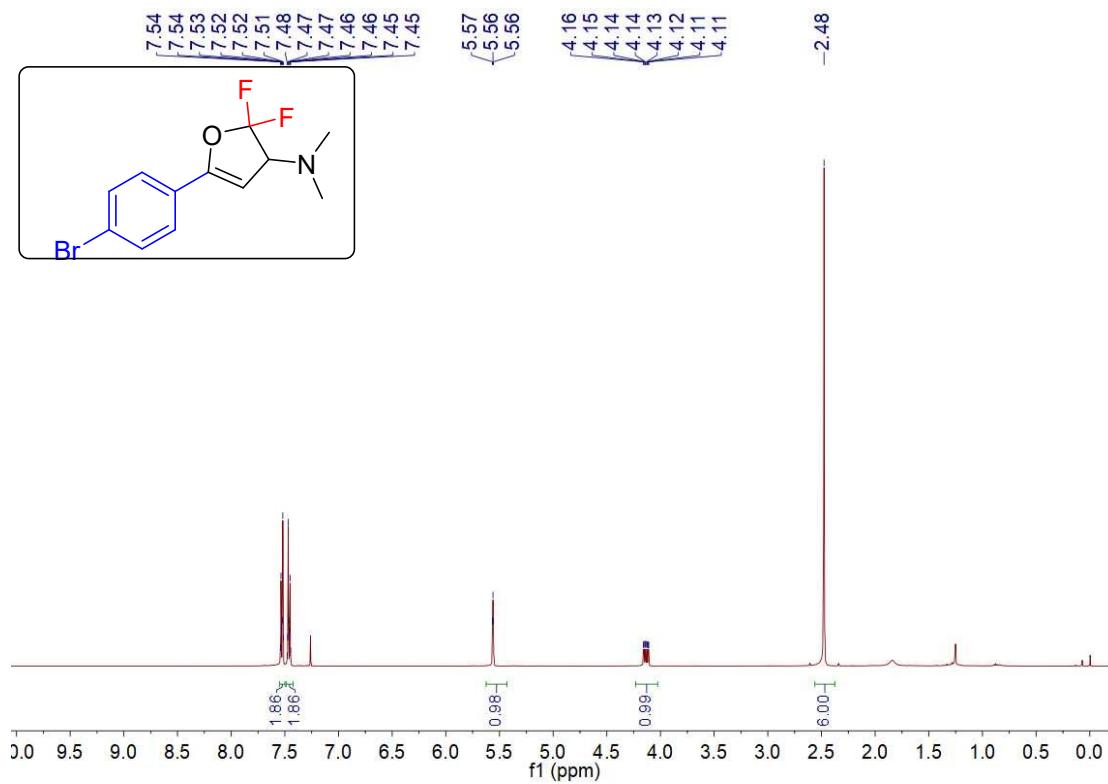

<sup>13</sup>C spectrum (CDCl<sub>3</sub>) 5-(4-bromophenyl)-2,2-difluoro-N,N-dimethyl-2,3-dihydrofuran

**n-3-amine(4l)**

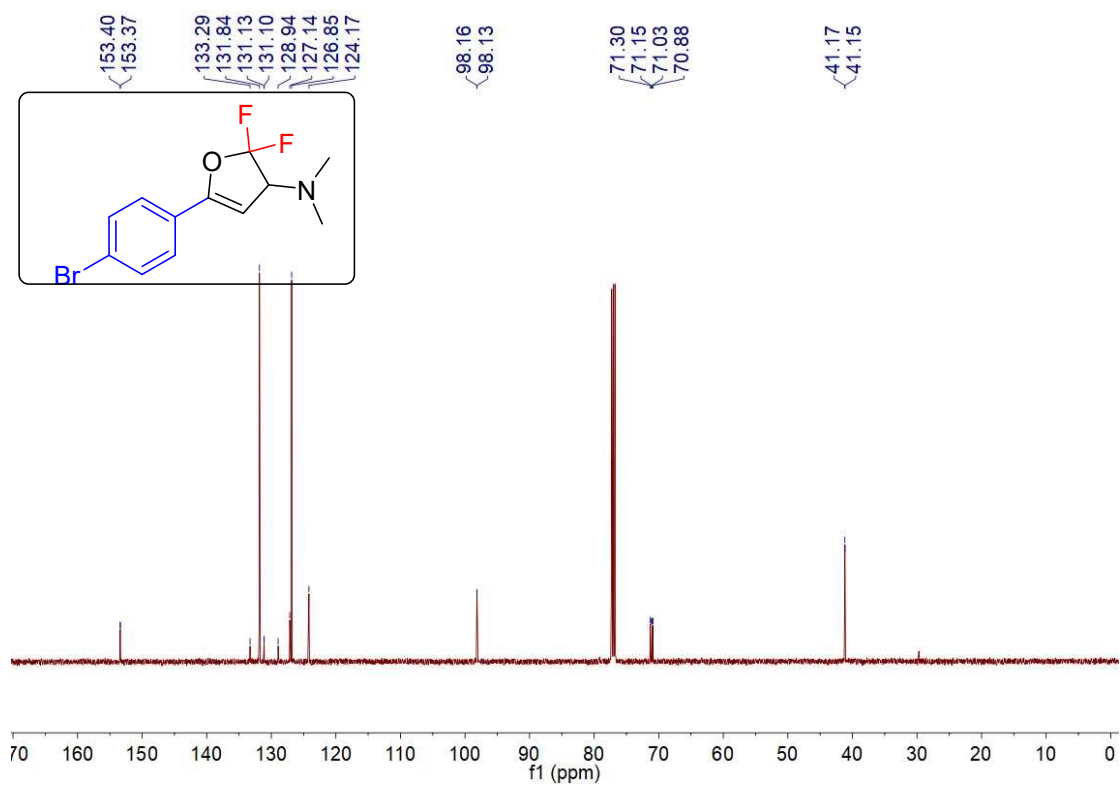

**<sup>19</sup>F spectrum (CDCl<sub>3</sub>) 5-(4-bromophenyl)-2,2-difluoro-N, N-dimethyl-2,3-dihydrofura  
n-3-amine(4l)**

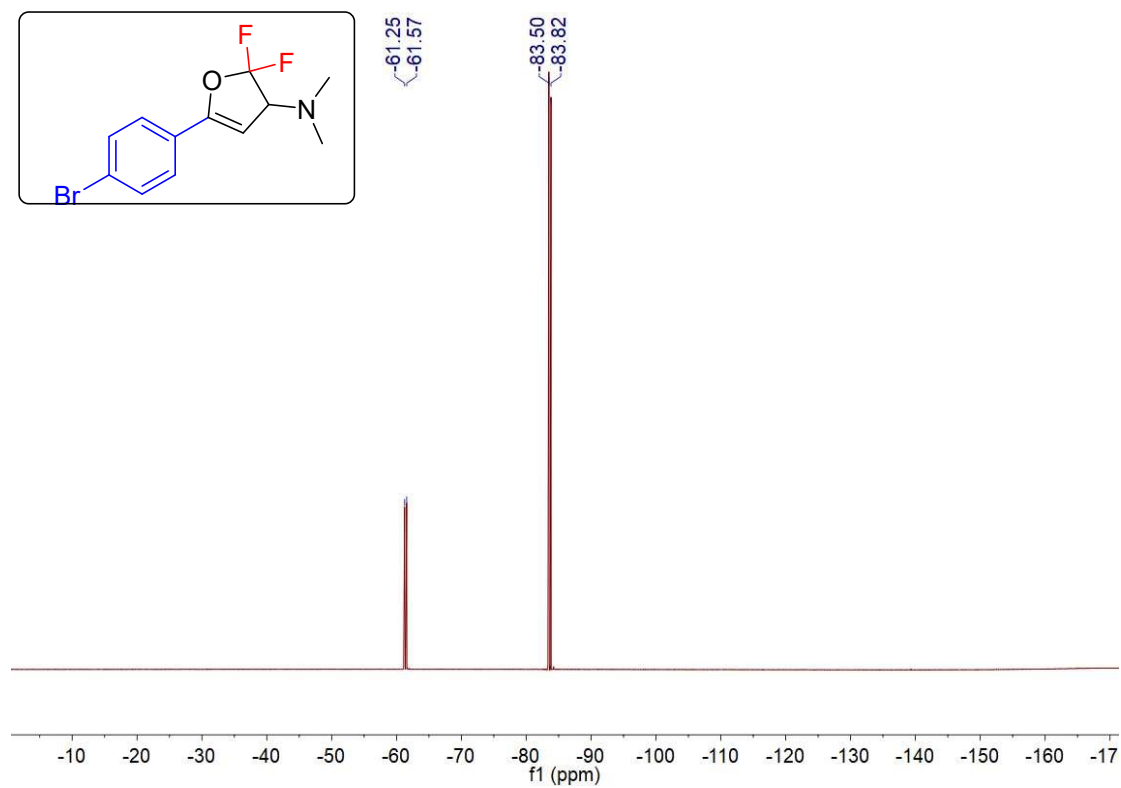

**<sup>1</sup>H spectrum (CDCl<sub>3</sub>) 2,2-difluoro-5-(4-iodophenyl)-N, N-dimethyl-2,3-dihydrofura**

**n-3-amine(4m)**

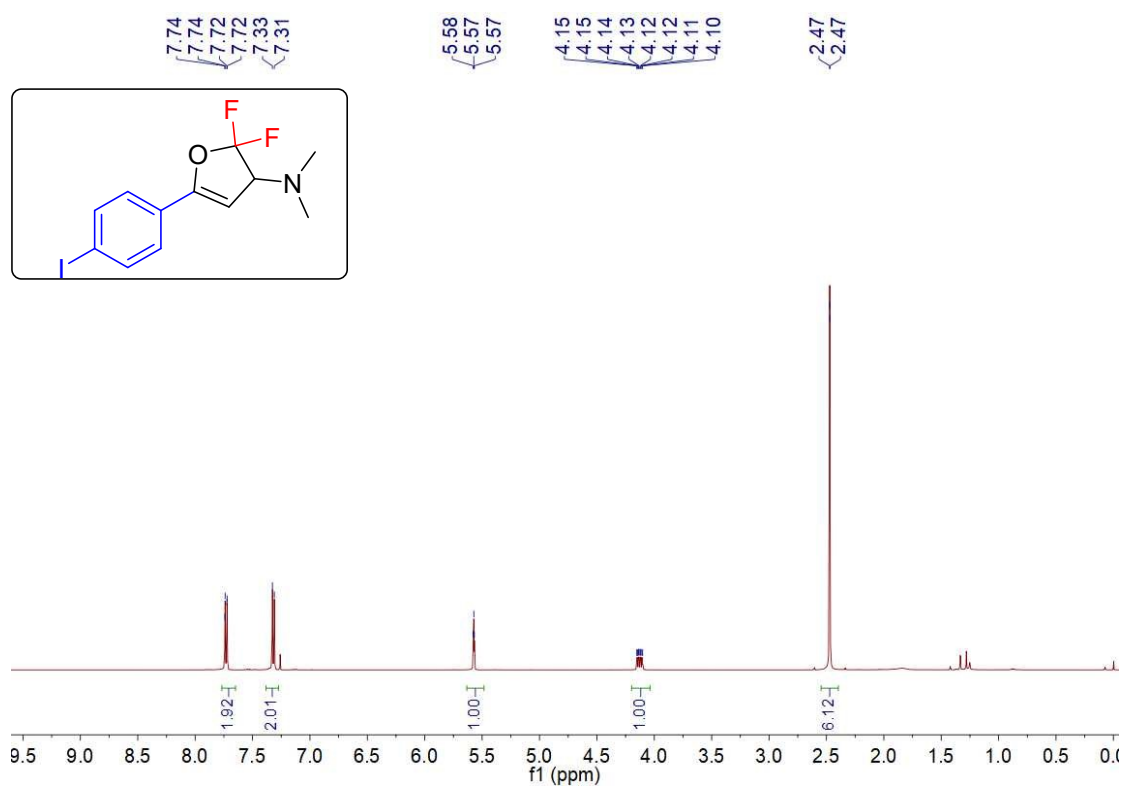

**<sup>13</sup>C spectrum (CDCl<sub>3</sub>) 2,2-difluoro-5-(4-iodophenyl)-N,N-dimethyl-2,3-dihydrofura**

**n-3-amine(4m)**

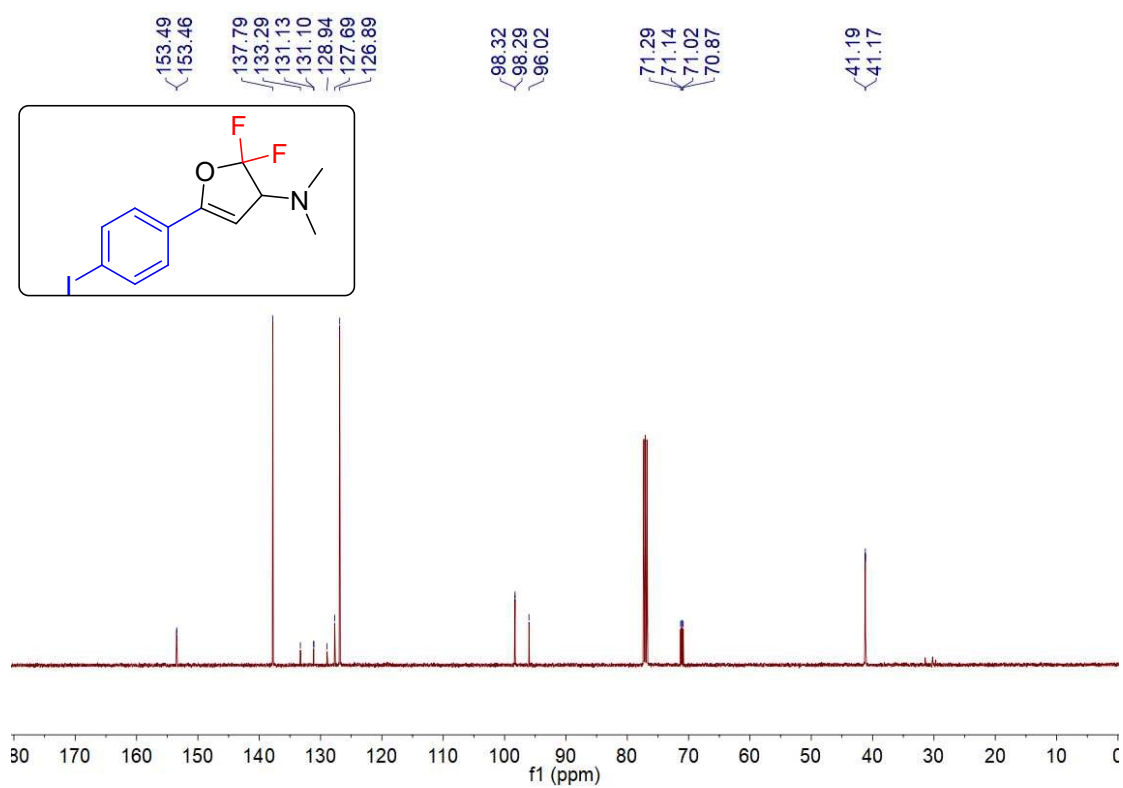

**<sup>19</sup>F spectrum (CDCl<sub>3</sub>) 2,2-difluoro-5-(4-iodophenyl)-N,N-dimethyl-2,3-dihydrofura**

**n-3-amine(4m)**

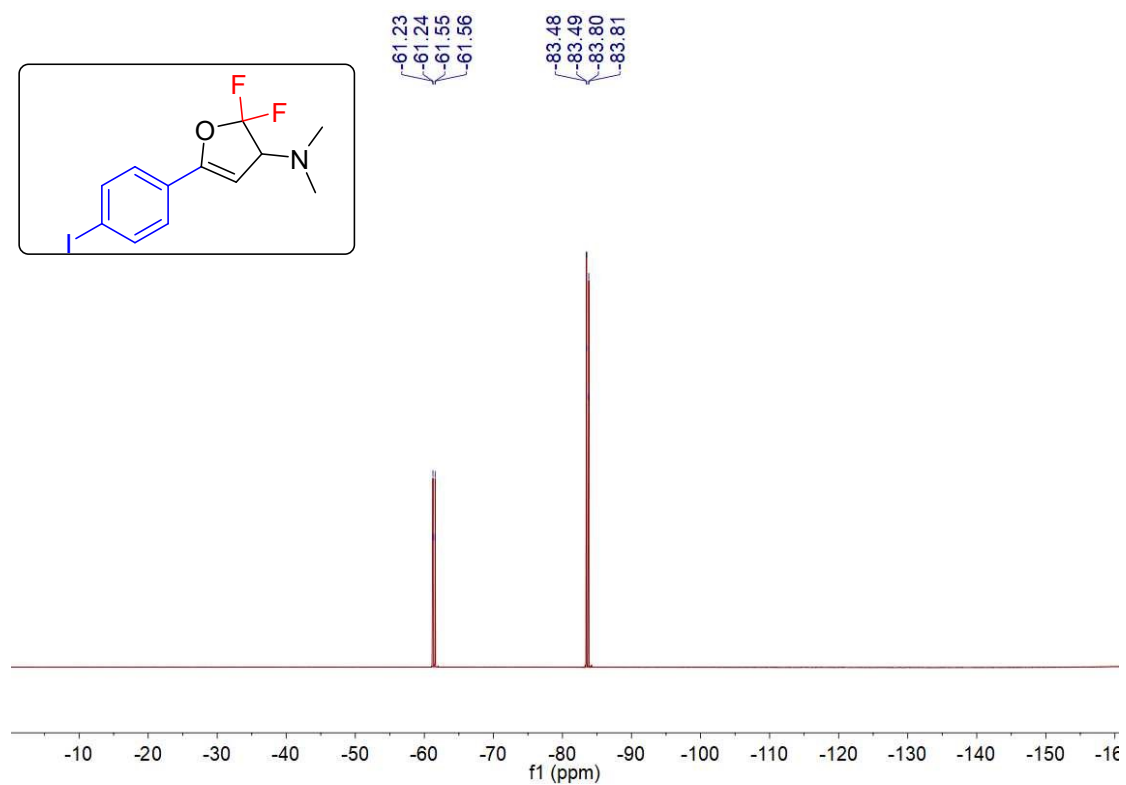

**<sup>1</sup>H spectrum (CDCl<sub>3</sub>) methyl 4-(4-(dimethylamino)-5,5-difluoro-4,5-dihydrofuran-2-yl)benzoate (4n)**

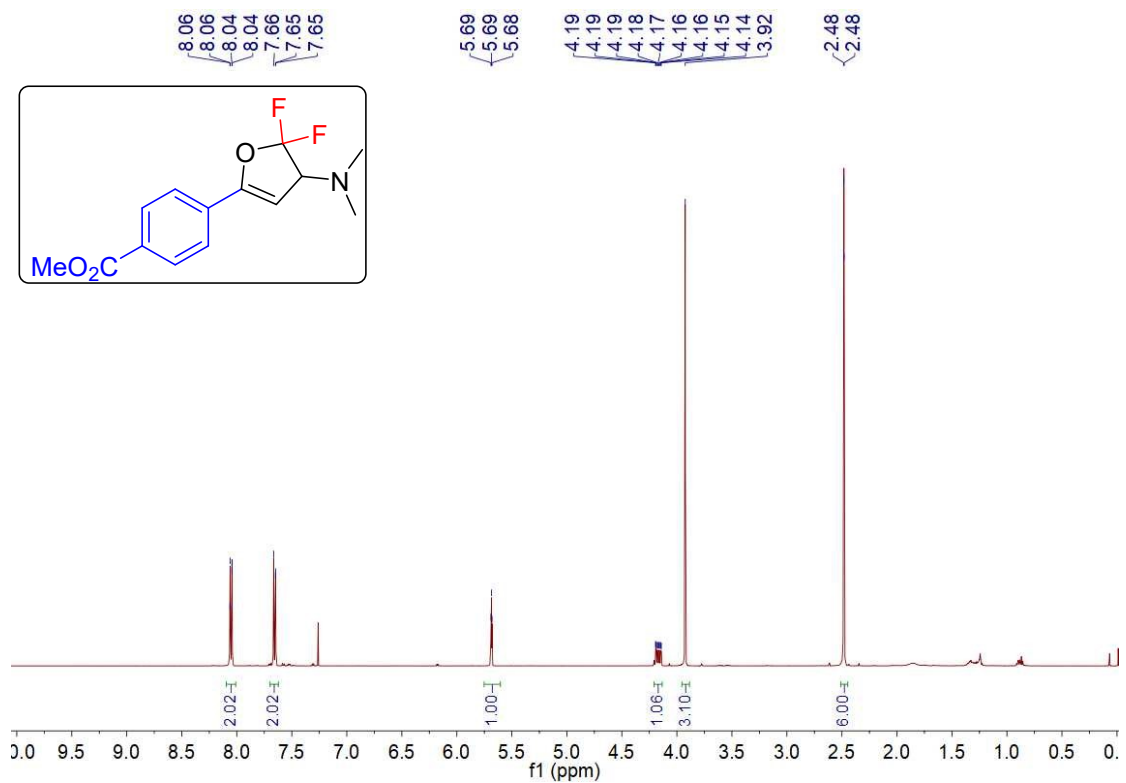

**<sup>13</sup>C spectrum (CDCl<sub>3</sub>) methyl 4-(4-(dimethylamino)-5,5-difluoro-4,5-dihydrofuran-2-yl)benzoate**

(4n)

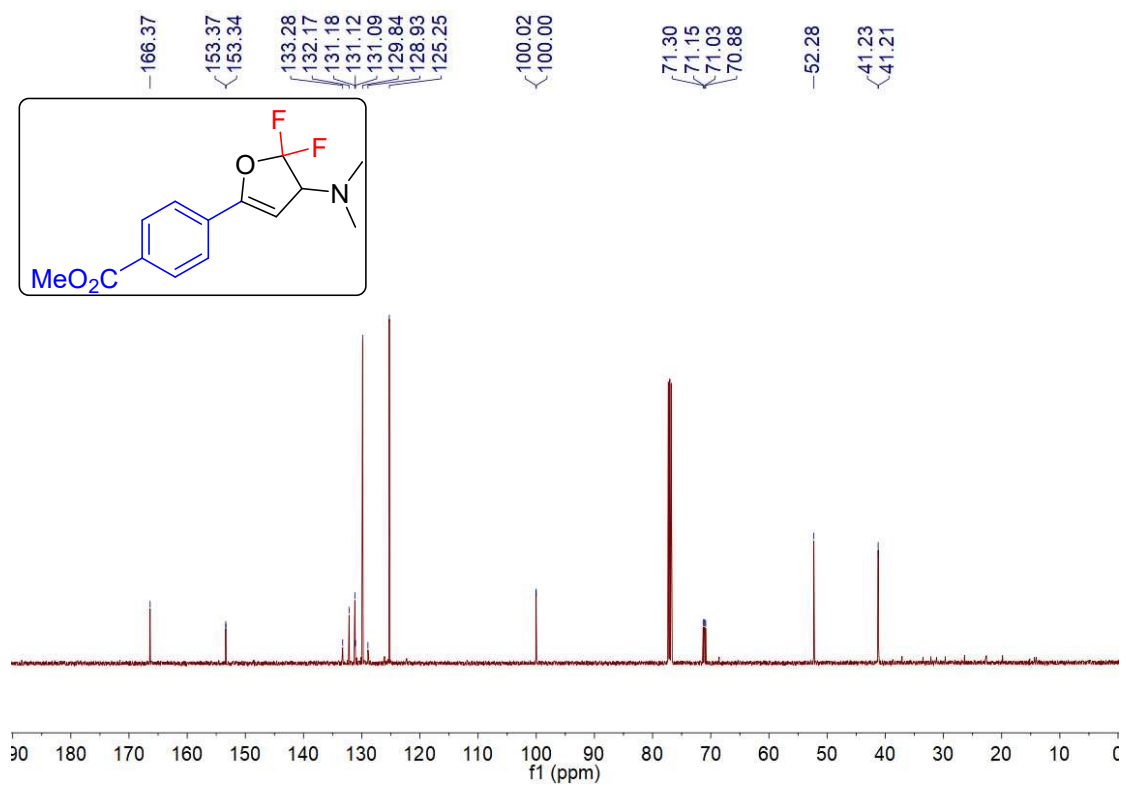

<sup>19</sup>F spectrum (CDCl<sub>3</sub>) methyl 4-(4-(dimethylamino)-5,5-difluoro-4,5-dihydrofuran-2-yl)benzoate (4n)

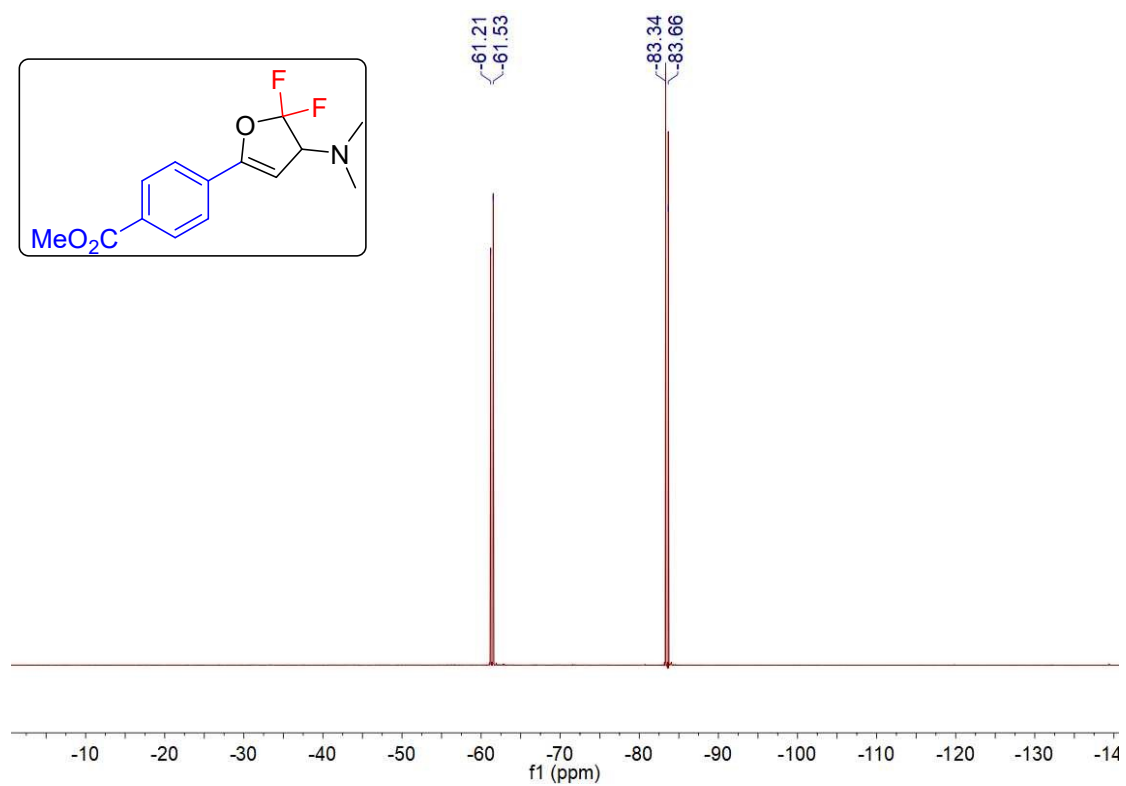

<sup>1</sup>H spectrum (CDCl<sub>3</sub>) 2,2-difluoro-N,N-dimethyl-5-(4-(trifluoromethyl)phenyl)-2,3-dihydrofuran

**n-3-amine (4o)**

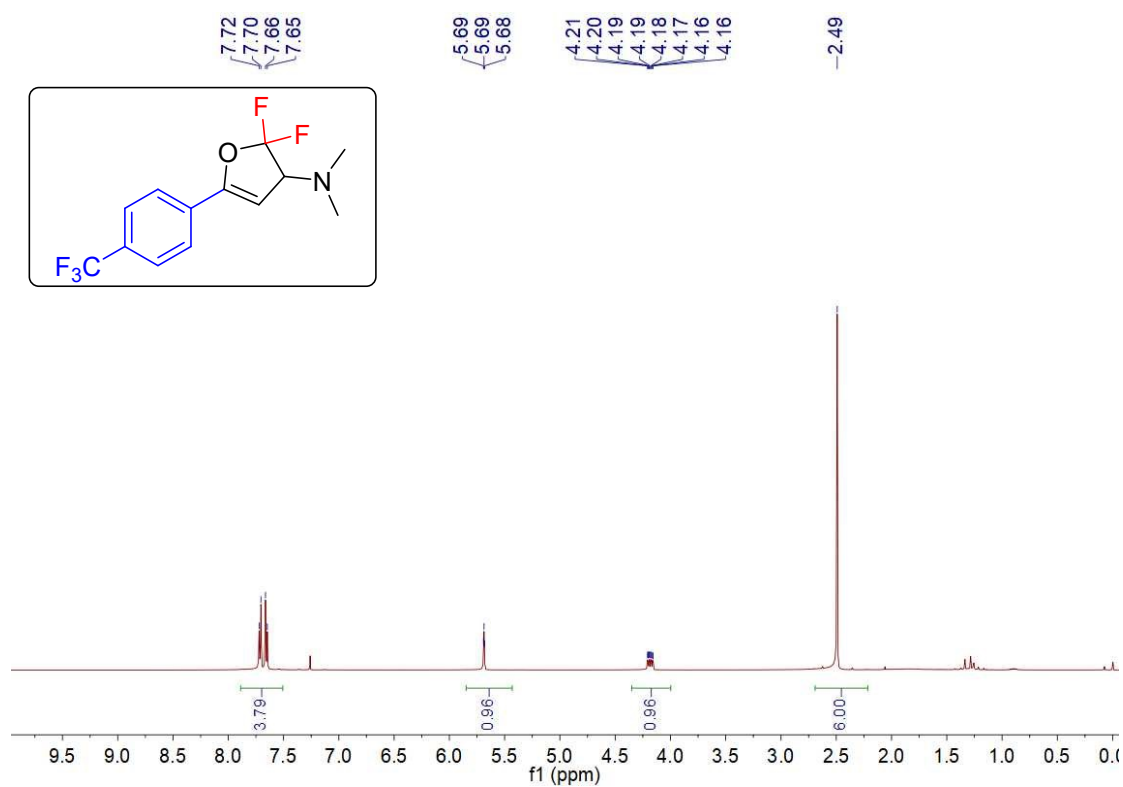

**<sup>13</sup>C spectrum (CDCl<sub>3</sub>) 2,2-difluoro-N, N-dimethyl-5-(4-(trifluoromethyl)phenyl)-2,3-dihydrofuran n-3-amine (4o)**

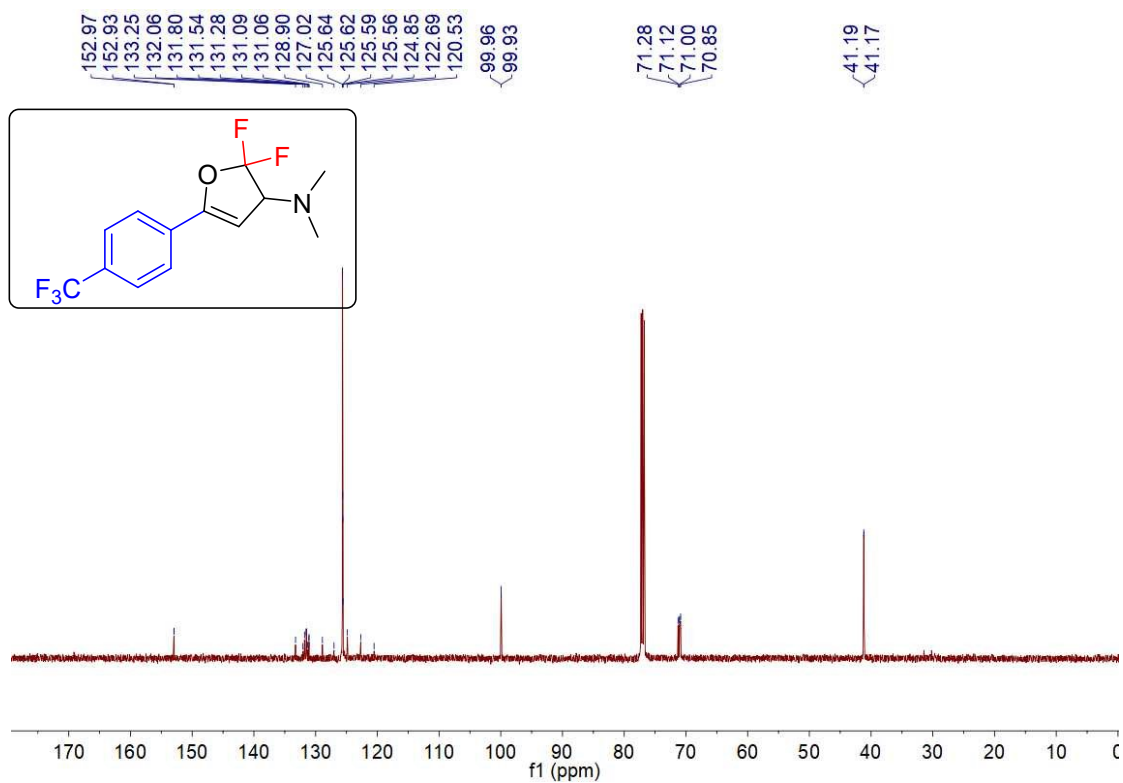

**<sup>19</sup>F spectrum (CDCl<sub>3</sub>) 2,2-difluoro-N, N-dimethyl-5-(4-(trifluoromethyl)phenyl)-2,3-**

**dihydrofuran**

**-3-amine (4o)**

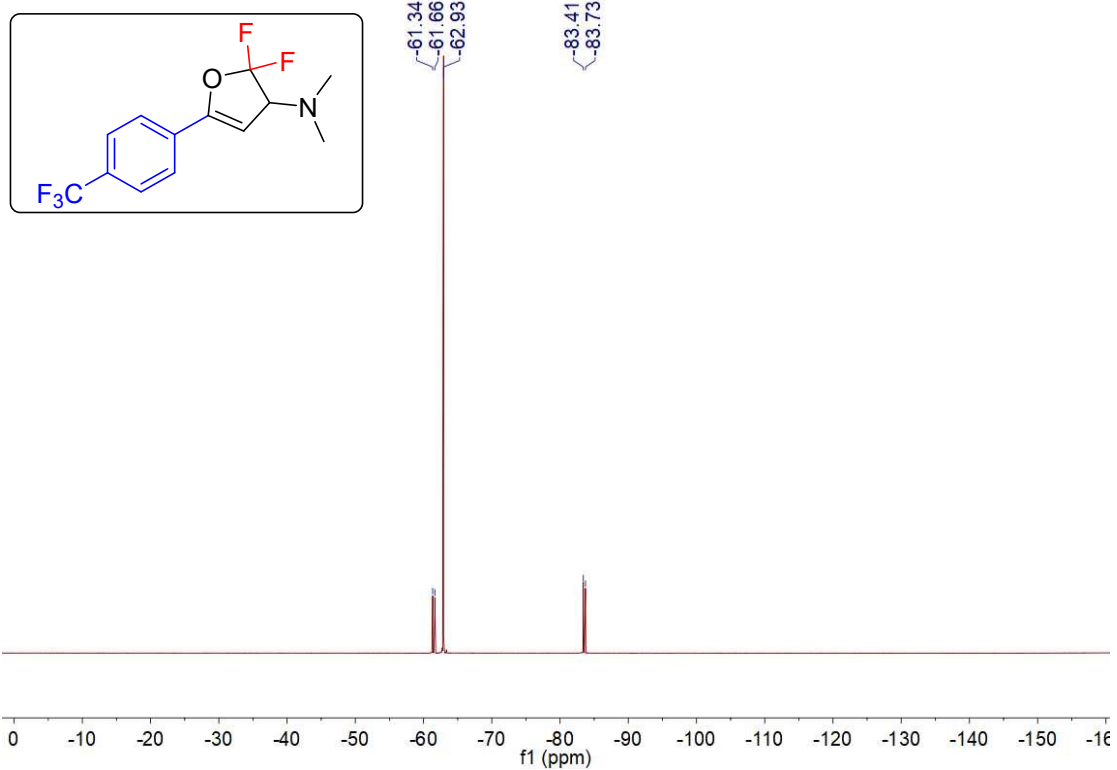

**<sup>1</sup>H spectrum (CDCl<sub>3</sub>) 2,2-difluoro-N,N-dimethyl-5-(4-(methylsulfonyl)phenyl)-2,3-dihydrofuran**

**-3-amine (4p)**

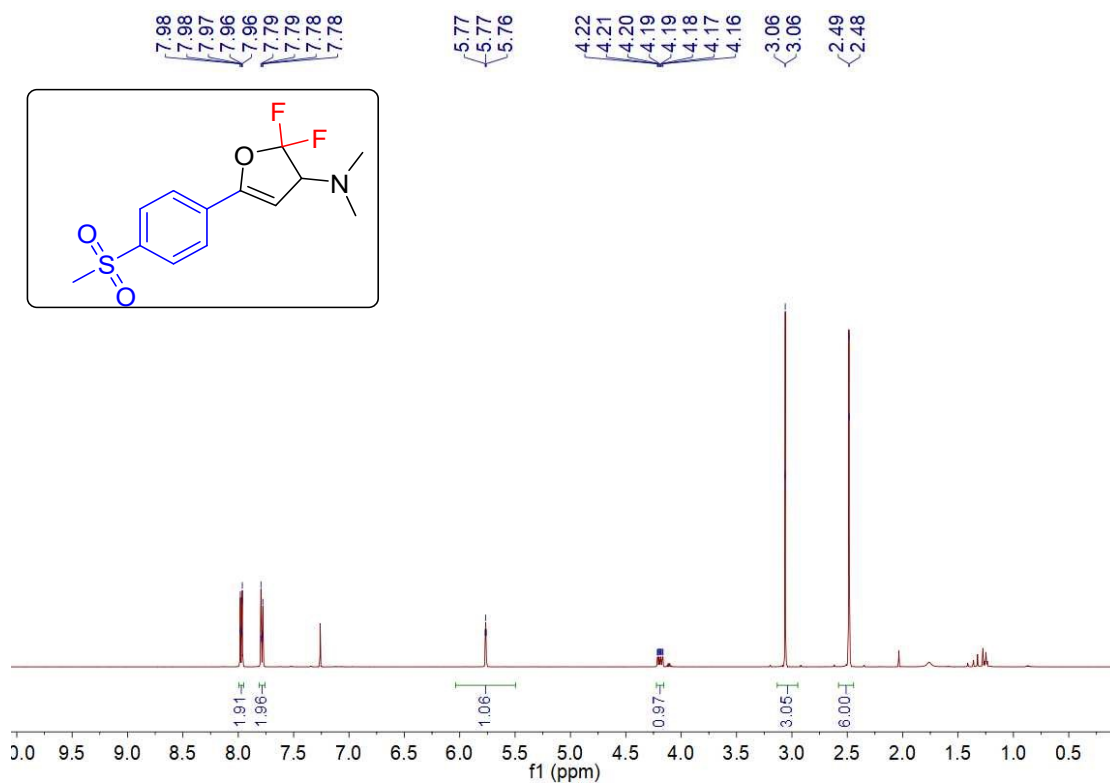



**<sup>13</sup>C spectrum (CDCl<sub>3</sub>) 2,2-difluoro-N, N-dimethyl-5-(4-(methylsulfonyl)phenyl)-2,3-dihydrofuran-3-amine (4p)**

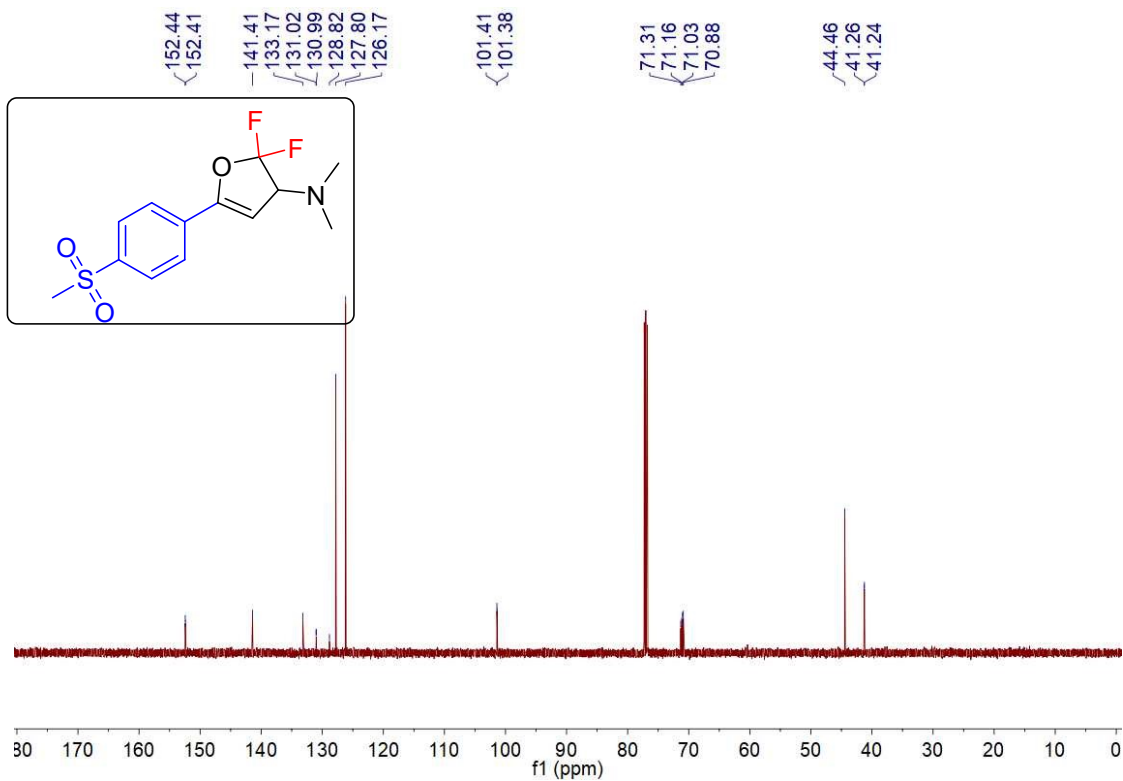

**<sup>19</sup>F spectrum (CDCl<sub>3</sub>) 2,2-difluoro-N, N-dimethyl-5-(4-(methylsulfonyl)phenyl)-2,3-dihydrofuran-3-amine (4p)**

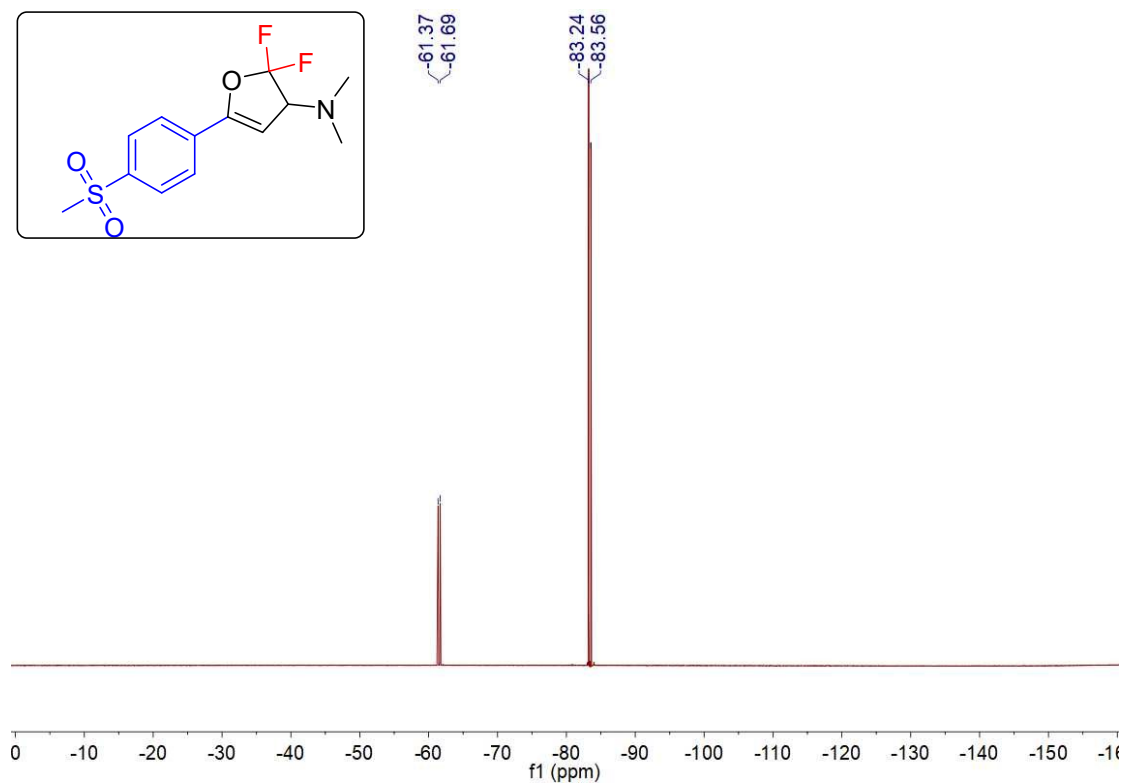

**<sup>1</sup>H spectrum (CDCl<sub>3</sub>) 4-(4-(dimethylamino)-5,5-difluoro-4,5-dihydrofuran-2-yl)benzotrile (4q)**

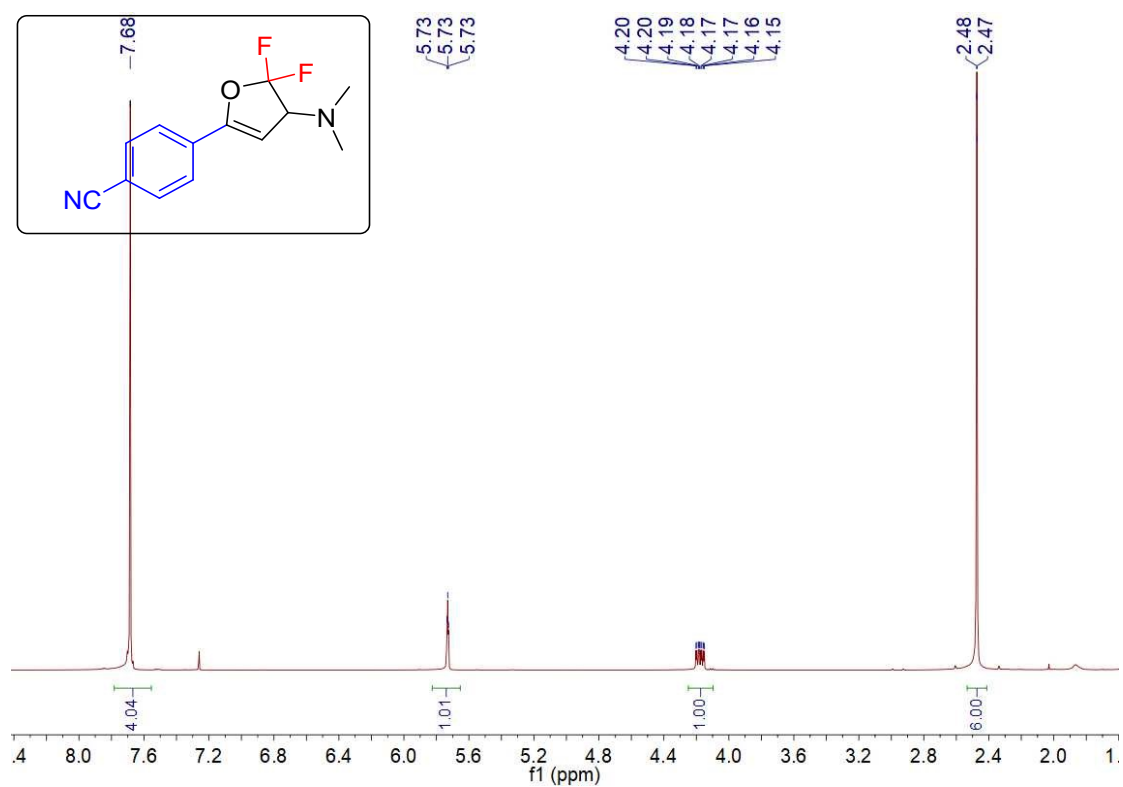

**<sup>13</sup>C spectrum (CDCl<sub>3</sub>) 4-(4-(dimethylamino)-5,5-difluoro-4,5-dihydrofuran-2-yl)benzotrile (4q)**

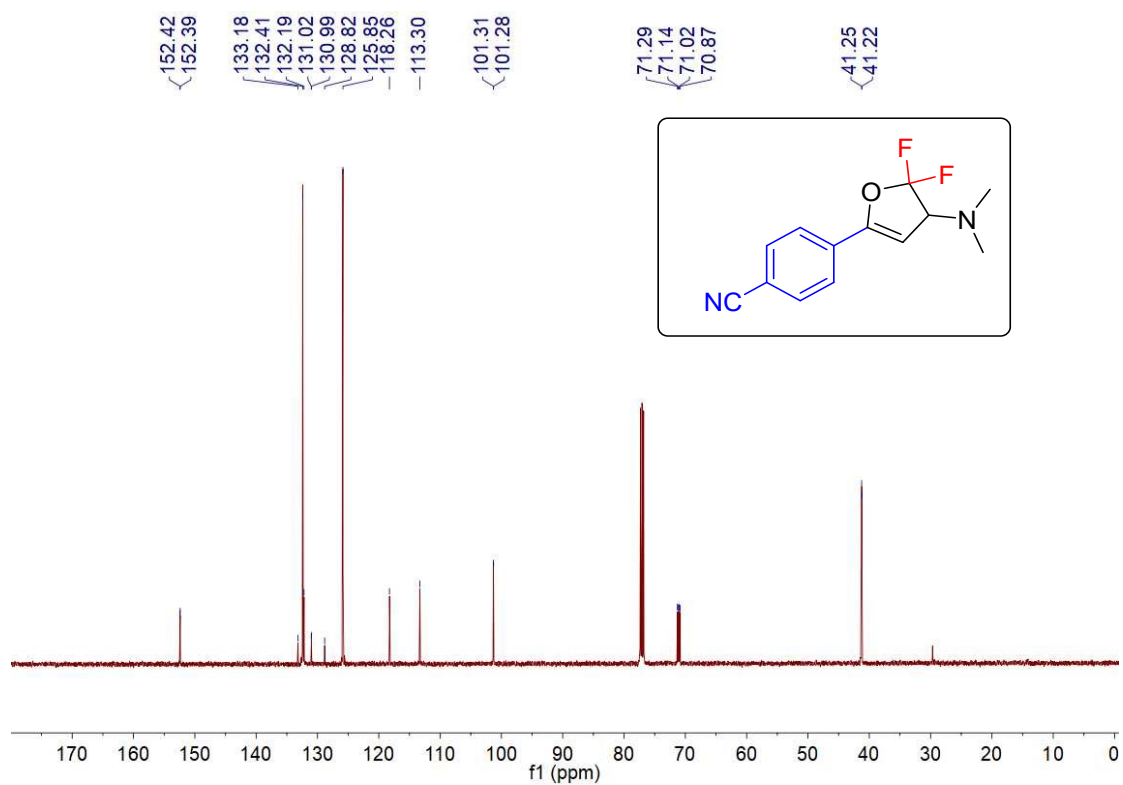

**<sup>19</sup>F spectrum (CDCl<sub>3</sub>) 4-(4-(dimethylamino)-5,5-difluoro-4,5-dihydrofuran-2-yl)benzotrile (4q)**

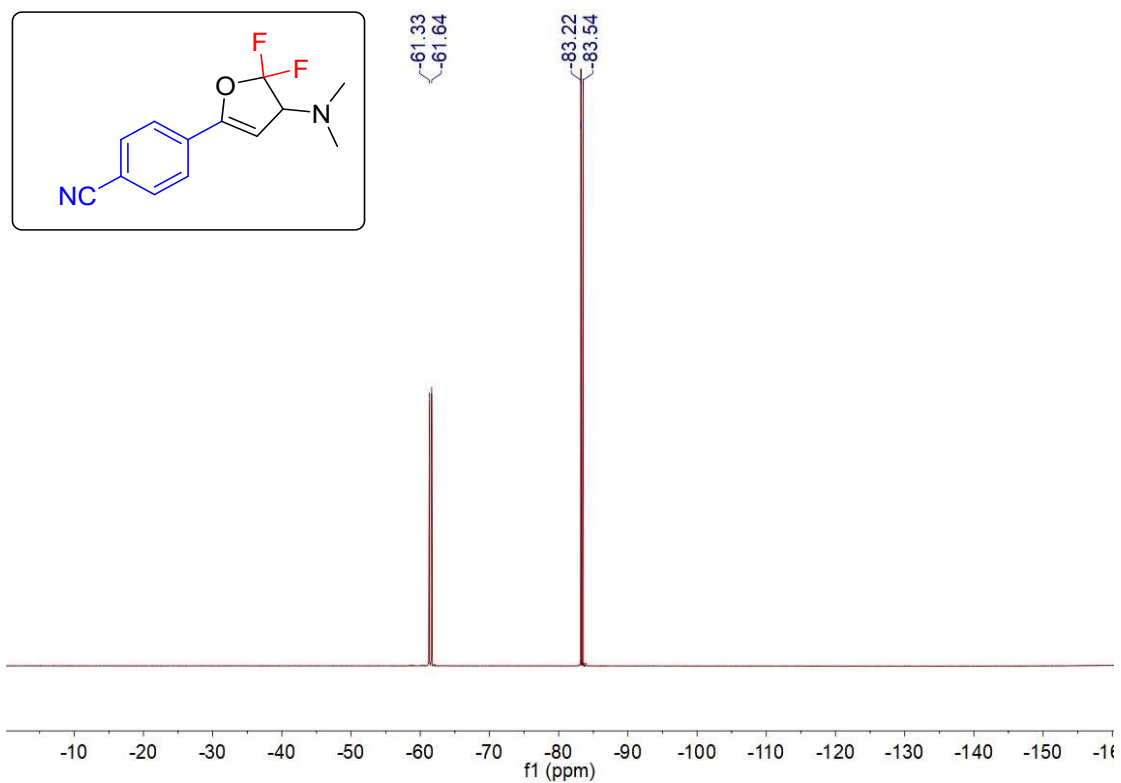

**<sup>1</sup>H spectrum (CDCl<sub>3</sub>) 2,2-difluoro-N,N-dimethyl-5-(4-nitrophenyl)-2,3-dihydrofuran-3-amine (4r)**

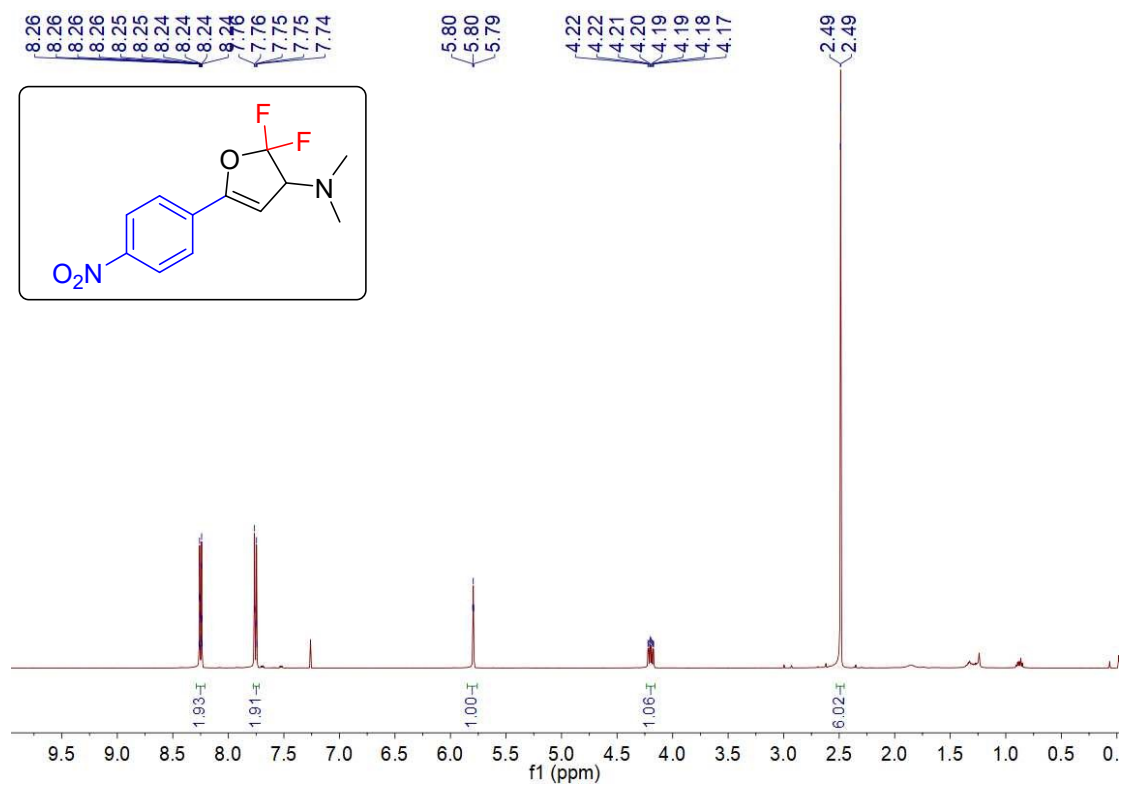

**<sup>13</sup>C spectrum (CDCl<sub>3</sub>) 2,2-difluoro-N,N-dimethyl-5-(4-nitrophenyl)-2,3-dihydrofuran-3-amine (**

4r)

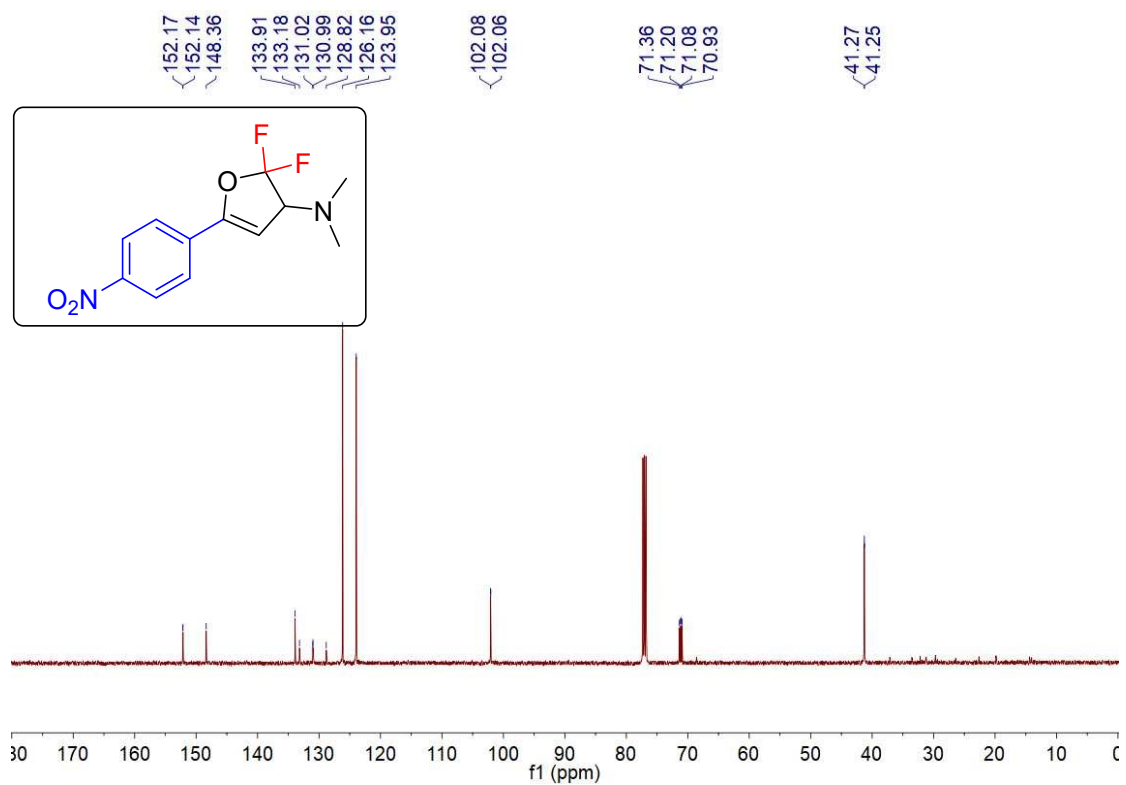

<sup>19</sup>F spectrum (CDCl<sub>3</sub>) 2,2-difluoro-N,N-dimethyl-5-(4-nitrophenyl)-2,3-dihydrofuran-3-amine (4r)

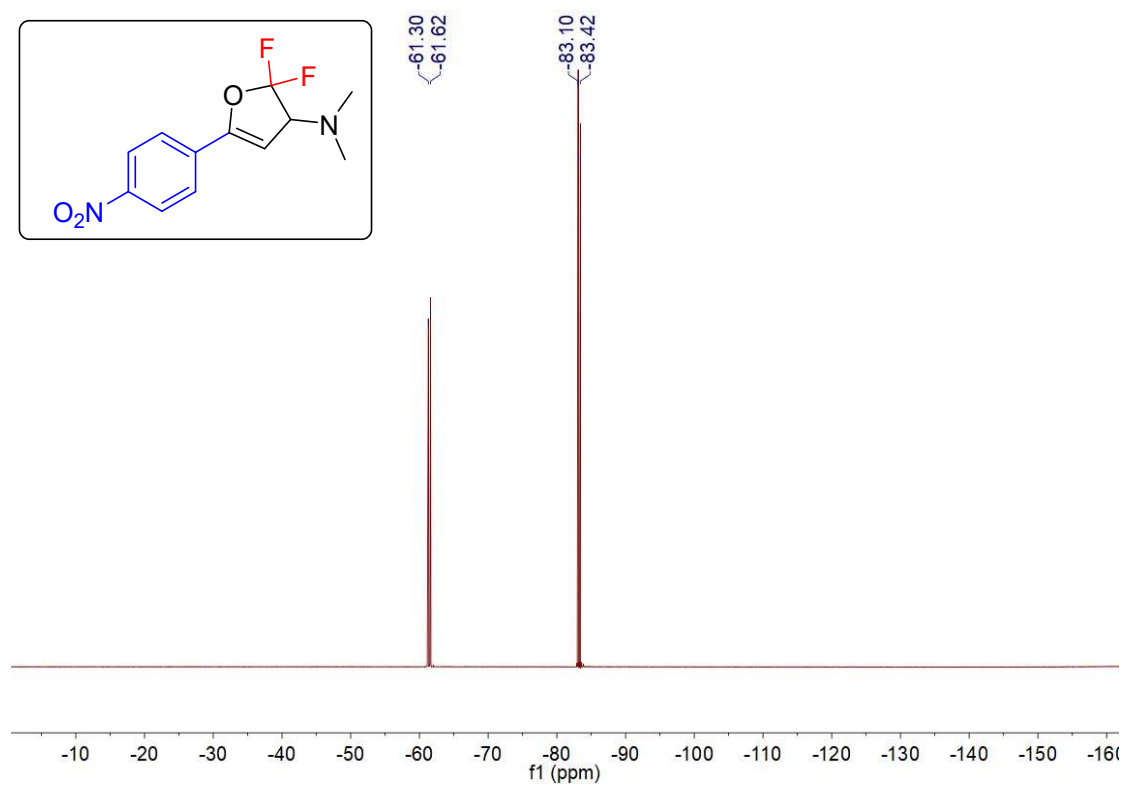

<sup>1</sup>H spectrum (CDCl<sub>3</sub>) 2,2-difluoro-N,N-dimethyl-5-(3-nitrophenyl)-2,3-dihydrofuran-3-amine

(4s)

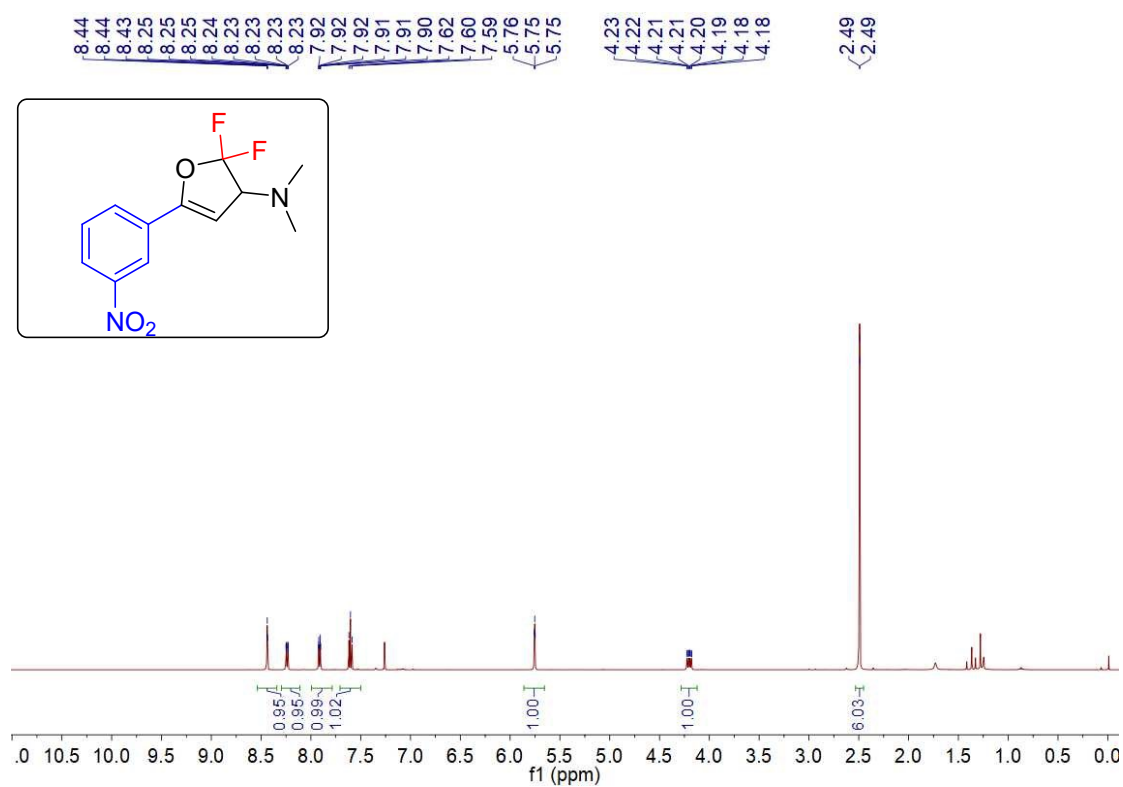

<sup>13</sup>C spectrum (CDCl<sub>3</sub>) 2,2-difluoro-N,N-dimethyl-5-(3-nitrophenyl)-2,3-dihydrofuran-3-amine

(4s)

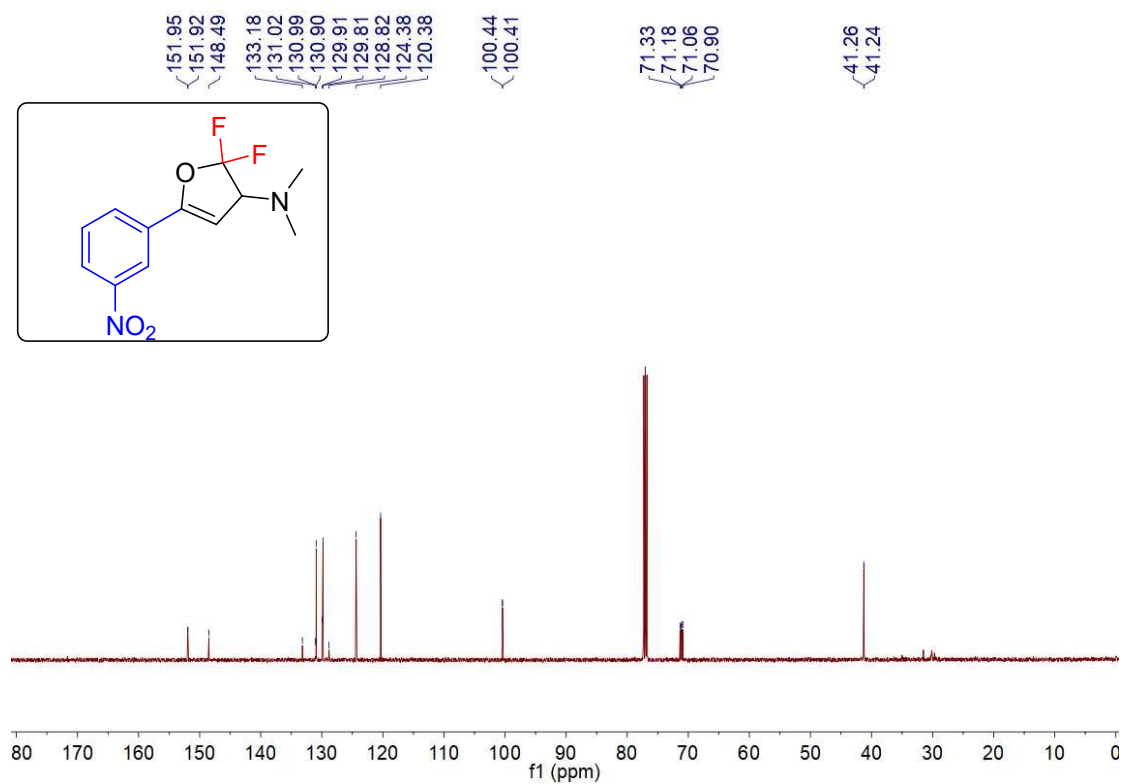

<sup>19</sup>F spectrum (CDCl<sub>3</sub>) 2,2-difluoro-N,N-dimethyl-5-(3-nitrophenyl)-2,3-dihydrofuran-3-amine

(4s)

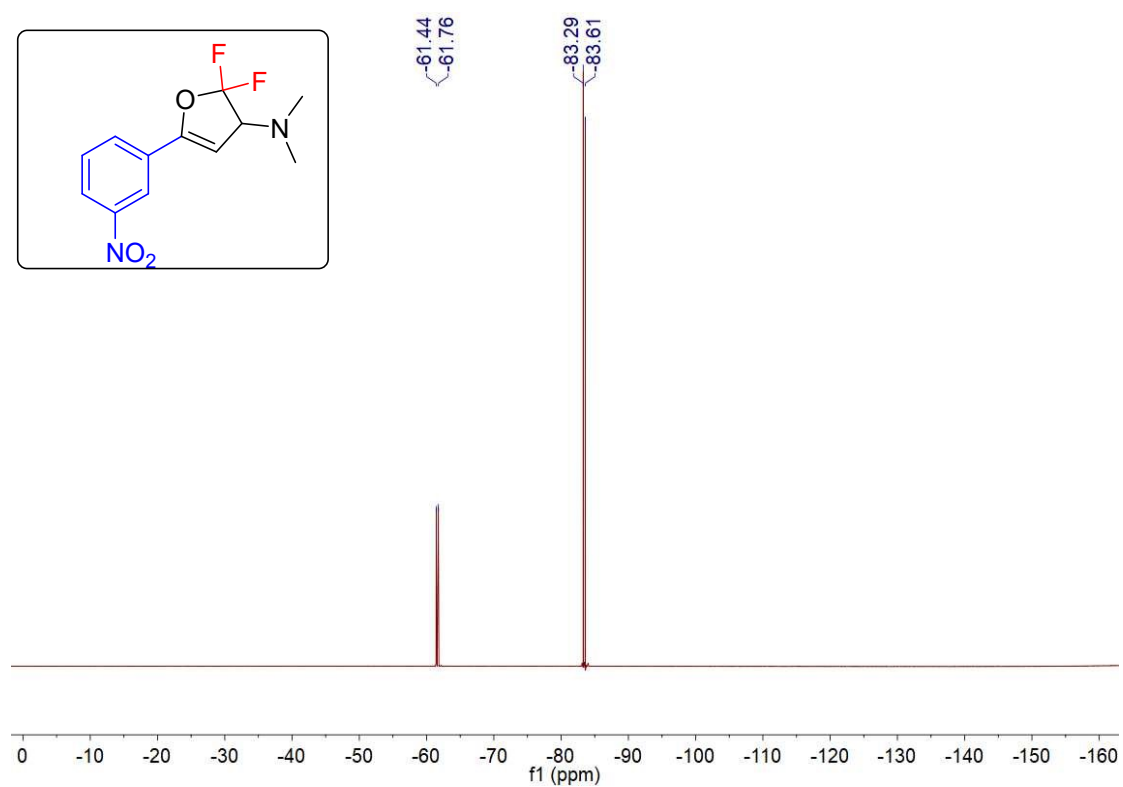

<sup>1</sup>H spectrum (CDCl<sub>3</sub>) (E)-2,2-difluoro-N,N-dimethyl-5-styryl-2,3-dihydrofuran-3-amine (4t)

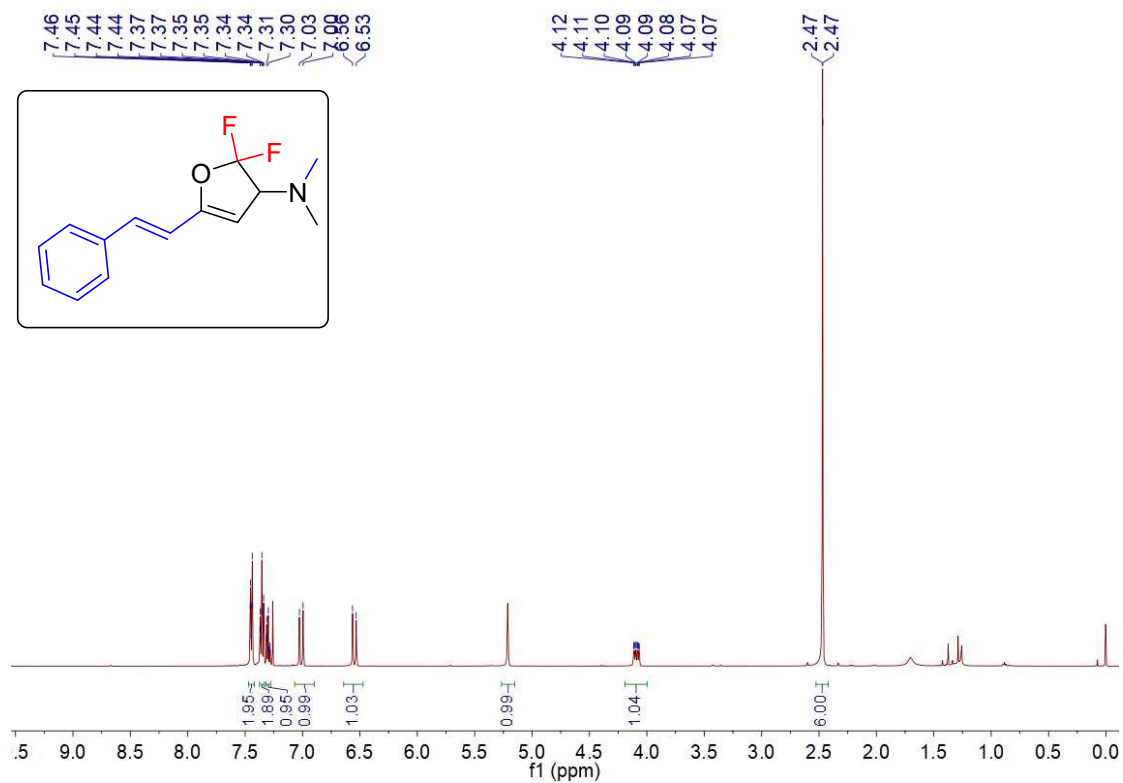

<sup>13</sup>C spectrum (CDCl<sub>3</sub>) (E)-2,2-difluoro-N,N-dimethyl-5-styryl-2,3-dihydrofuran-3-amine (4t)

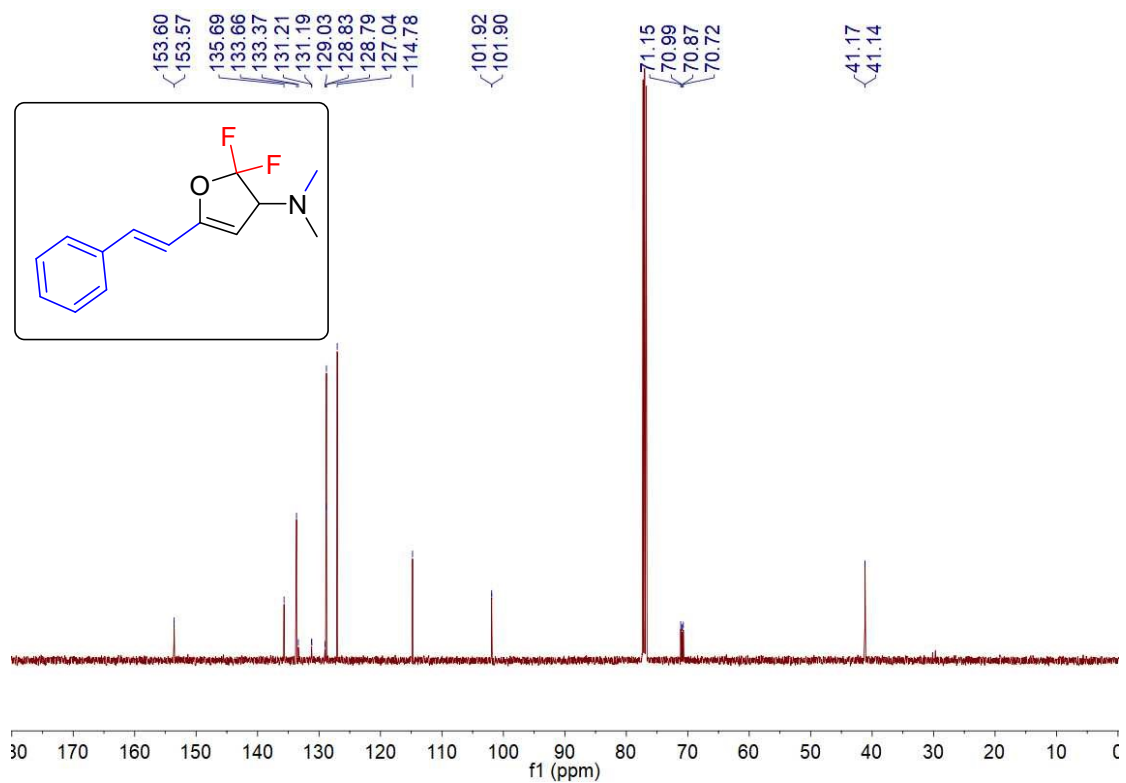

**<sup>19</sup>F spectrum (CDCl<sub>3</sub>) (E)-2,2-difluoro-N,N-dimethyl-5-styryl-2,3-dihydrofuran-3-amine (4t)**

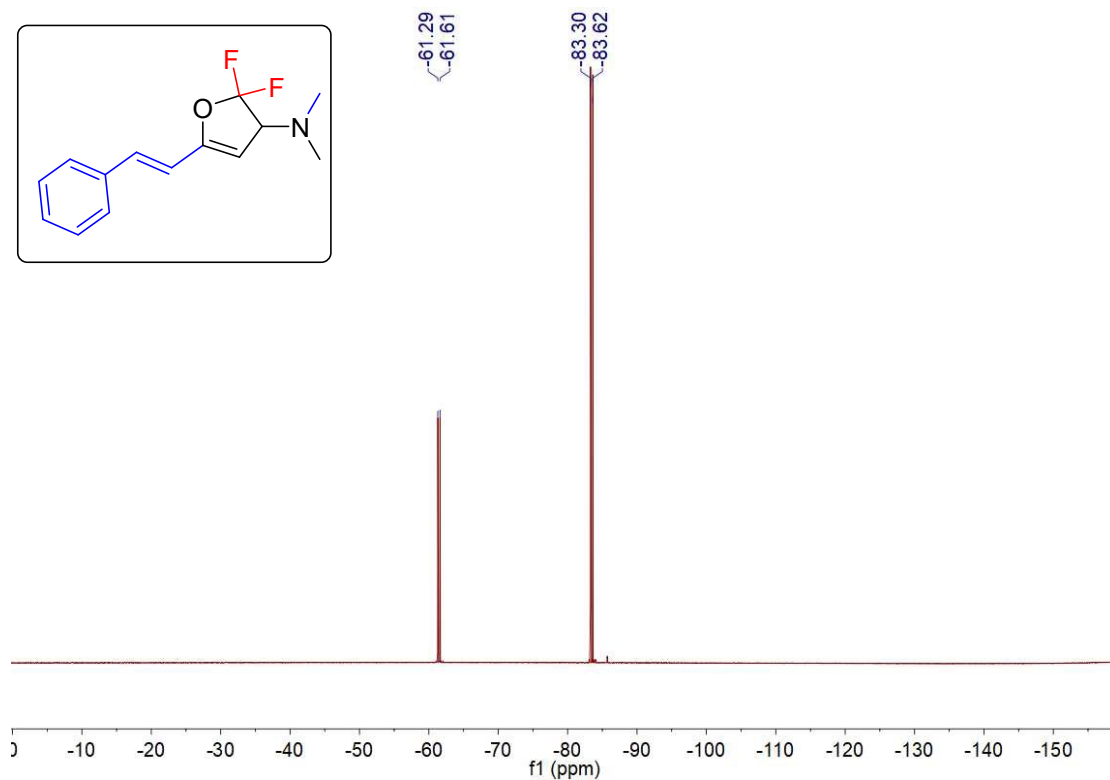

**<sup>1</sup>H spectrum (CDCl<sub>3</sub>) 2,2-difluoro-N,N-dimethyl-5-(thiophen-2-yl)-2,3-dihydrofuran-3-amine**

(4u)

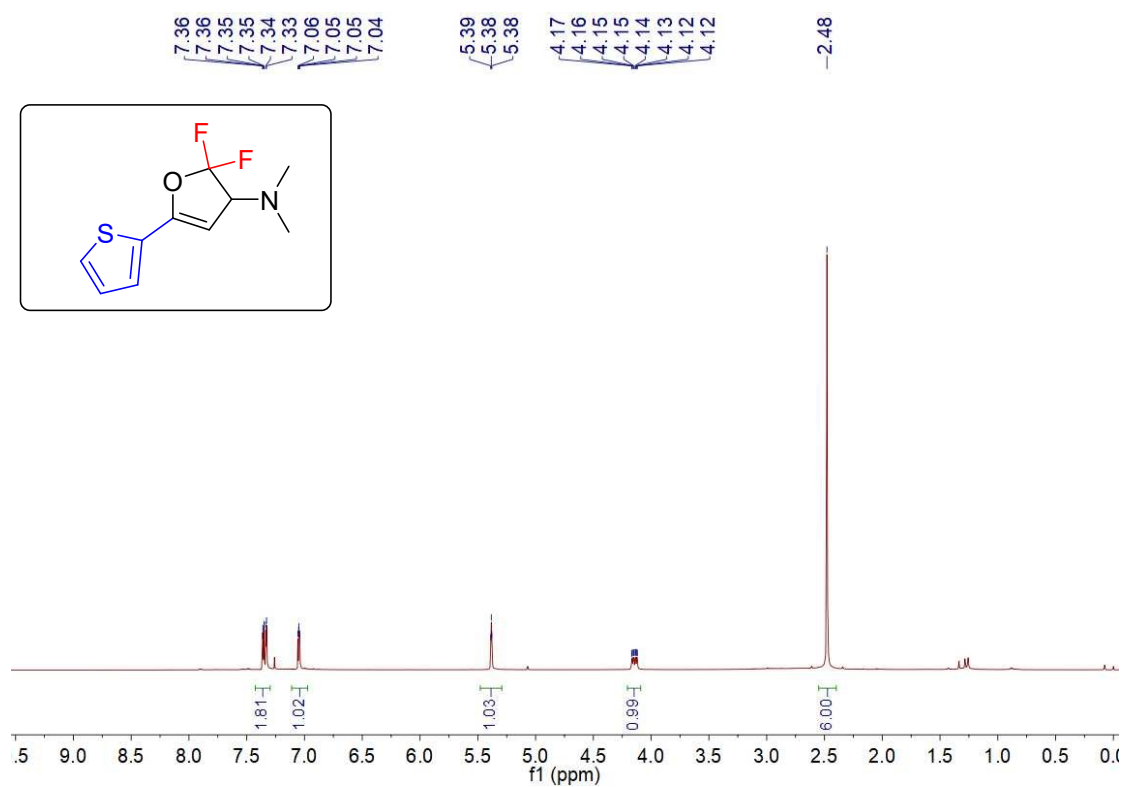

<sup>13</sup>C spectrum (CDCl<sub>3</sub>) 2,2-difluoro-N,N-dimethyl-5-(thiophen-2-yl)-2,3-dihydrofuran-3-amine (4u)

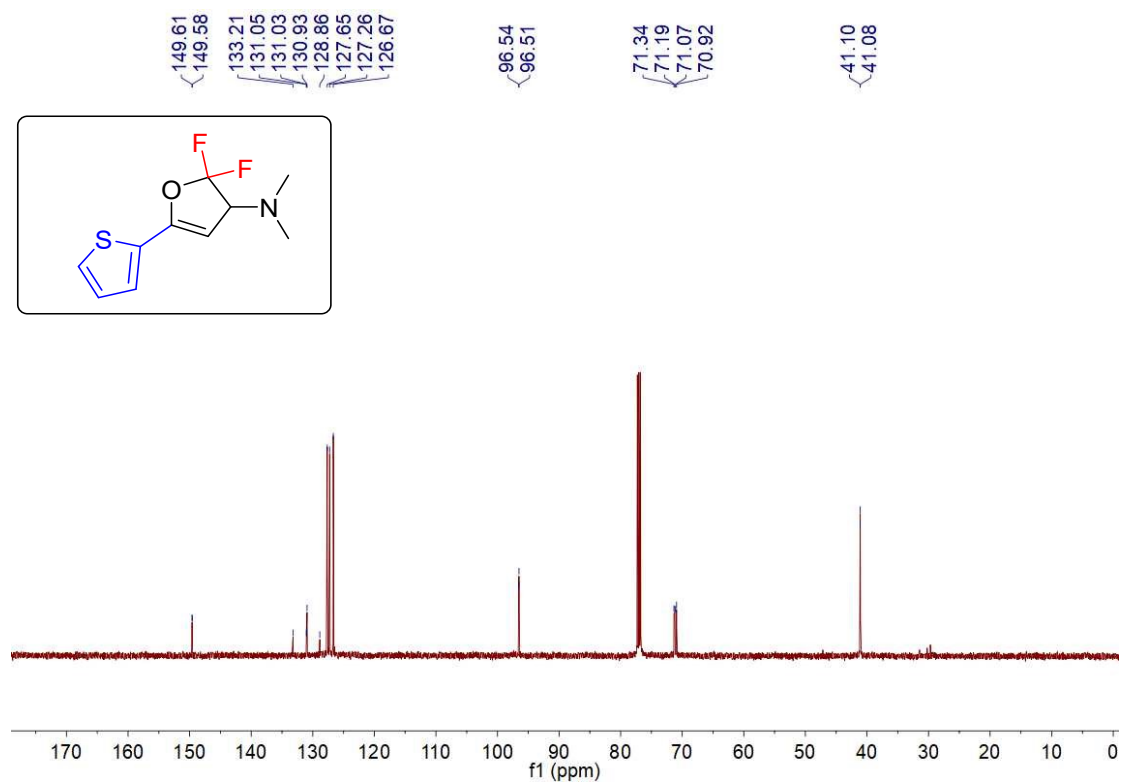

<sup>19</sup>F spectrum (CDCl<sub>3</sub>) 2,2-difluoro-N,N-dimethyl-5-(thiophen-2-yl)-2,3-dihydrofuran-3-amine



(4u)

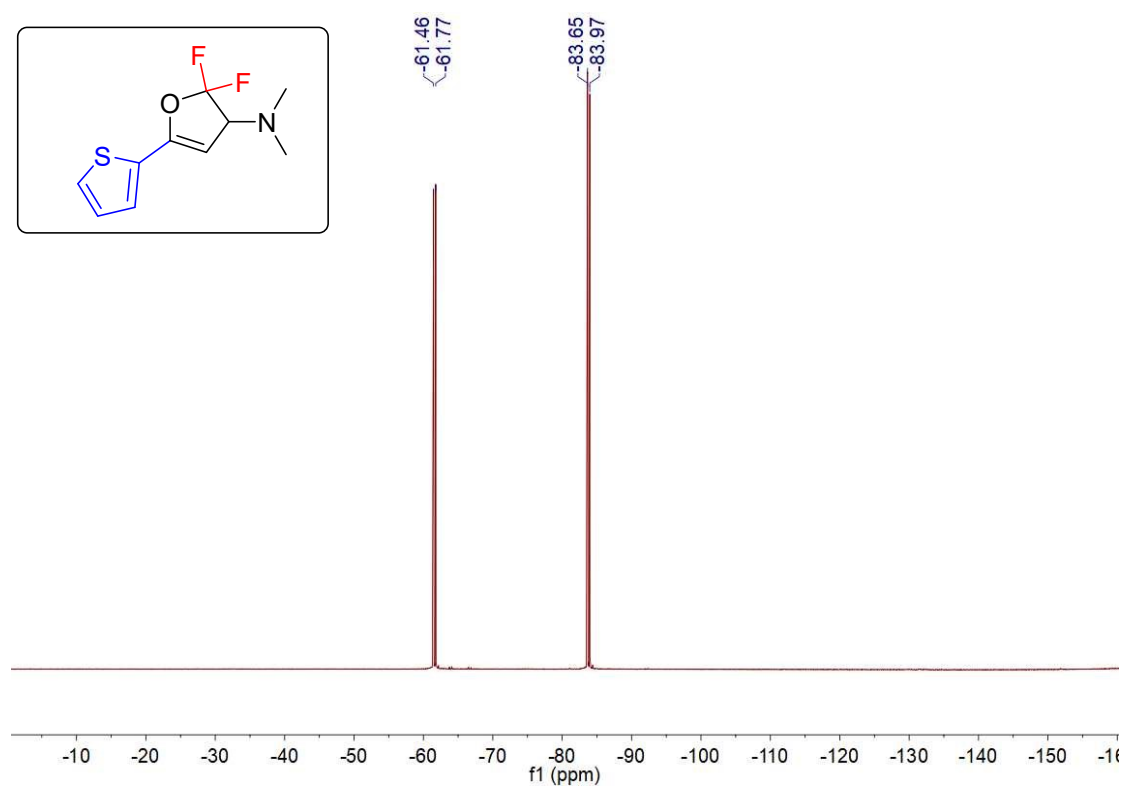

<sup>1</sup>H spectrum (CDCl<sub>3</sub>) 1,4-bis(2,2-difluoro-5-phenyl-2,3-dihydrofuran-3-yl)piperazine (4v)

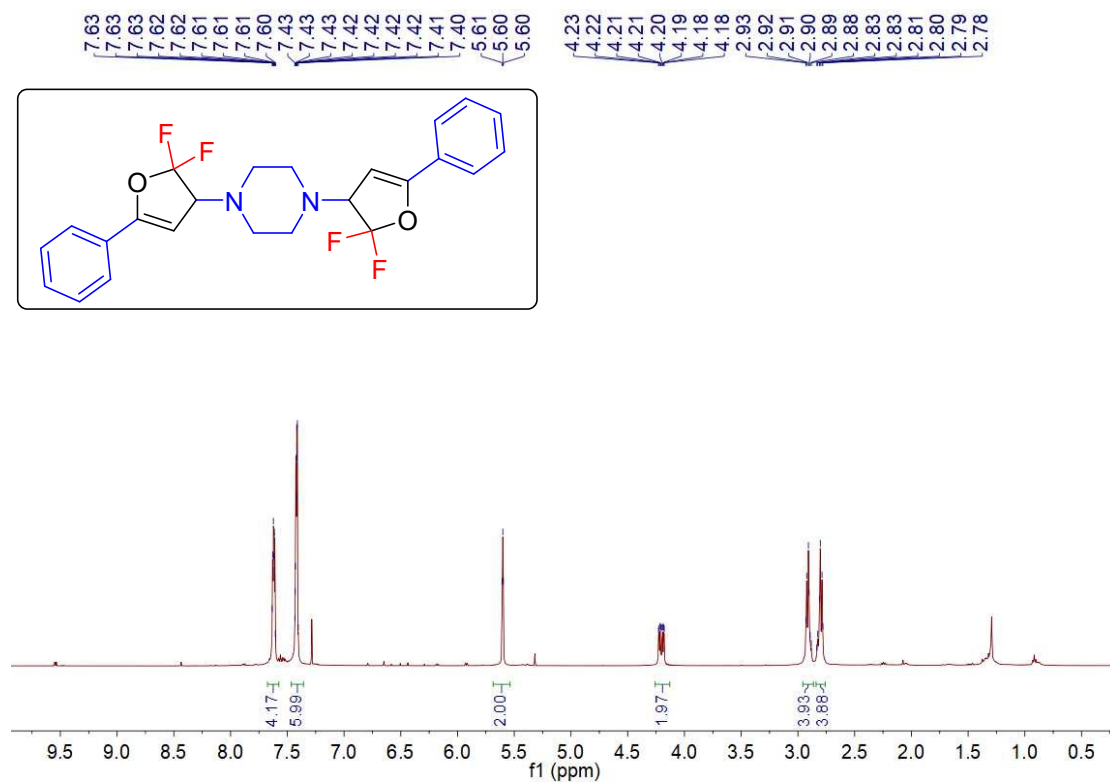

<sup>13</sup>C spectrum (CDCl<sub>3</sub>) 1,4-bis(2,2-difluoro-5-phenyl-2,3-dihydrofuran-3-yl)piperazine (4v)

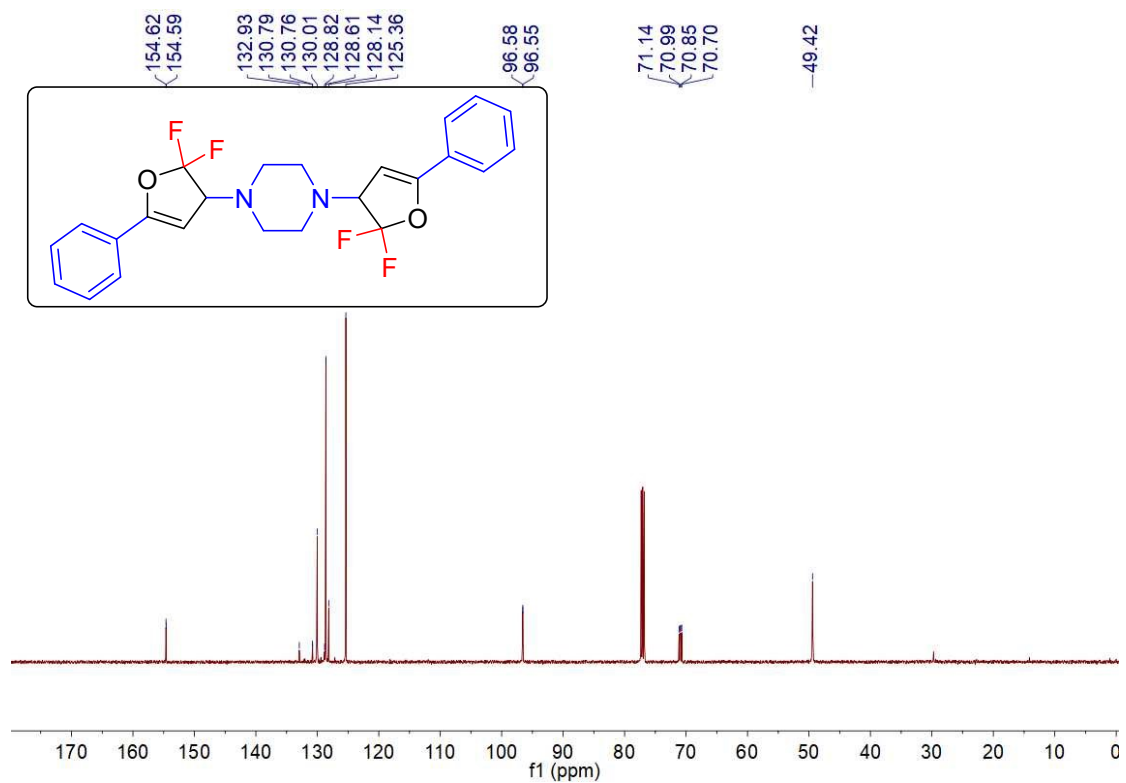

**<sup>19</sup>F spectrum (CDCl<sub>3</sub>) 1,4-bis(2,2-difluoro-5-phenyl-2,3-dihydrofuran-3-yl)piperazine (4v)**

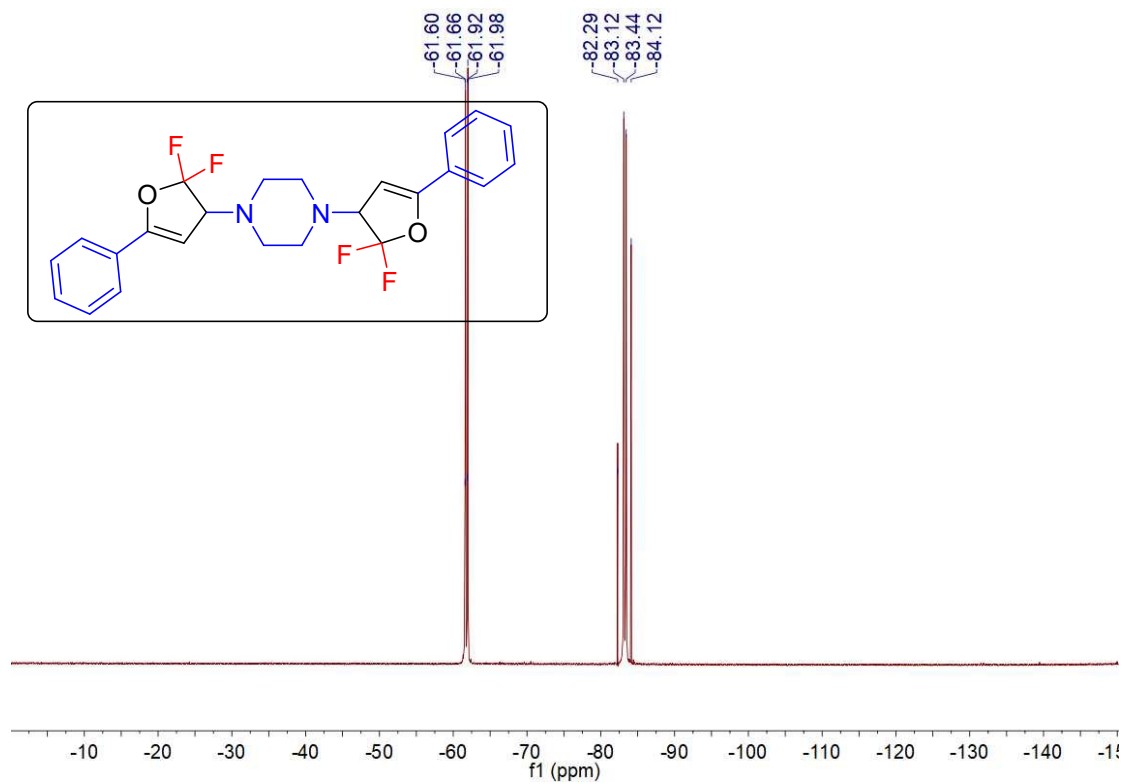

**<sup>1</sup>H spectrum (CDCl<sub>3</sub>) 1-(2,2-difluoro-5-phenyl-2,3-dihydrofuran-3-yl) pyrrolidine (5a)**

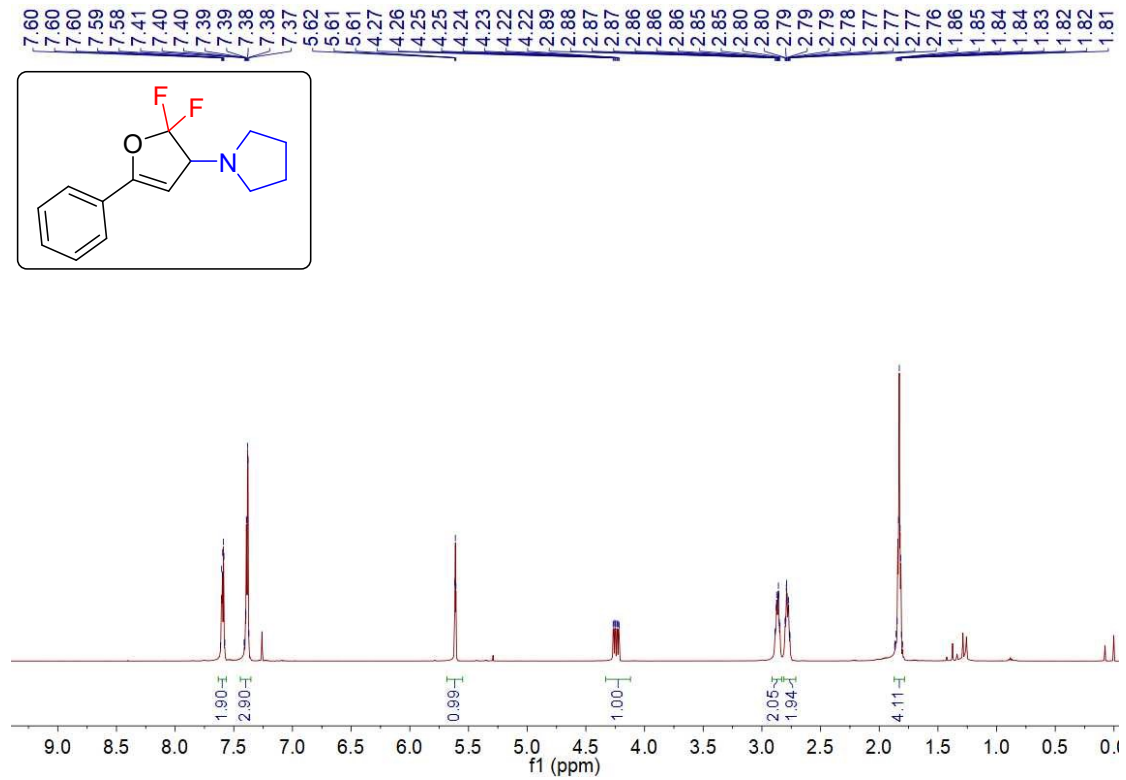

<sup>13</sup>C spectrum (CDCl<sub>3</sub>) 1-(2,2-difluoro-5-phenyl-2,3-dihydrofuran-3-yl) pyrrolidine (5a)

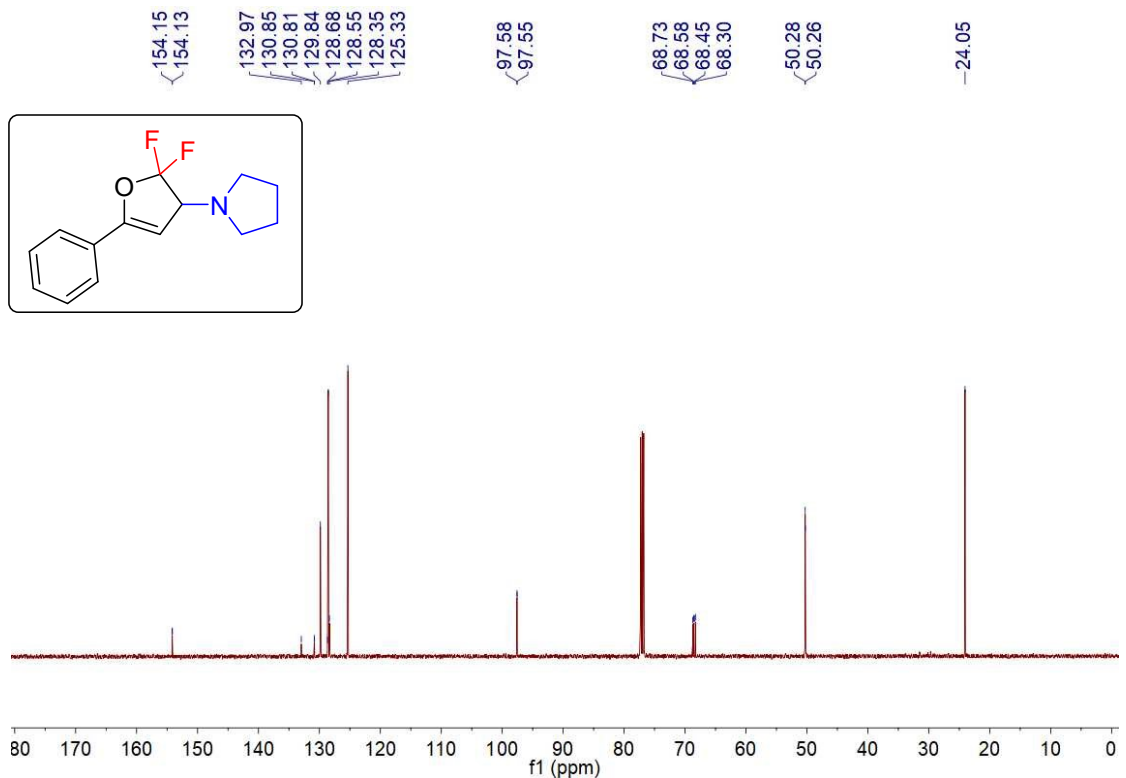

<sup>19</sup>F spectrum (CDCl<sub>3</sub>) 1-(2,2-difluoro-5-phenyl-2,3-dihydrofuran-3-yl) pyrrolidine (5a)

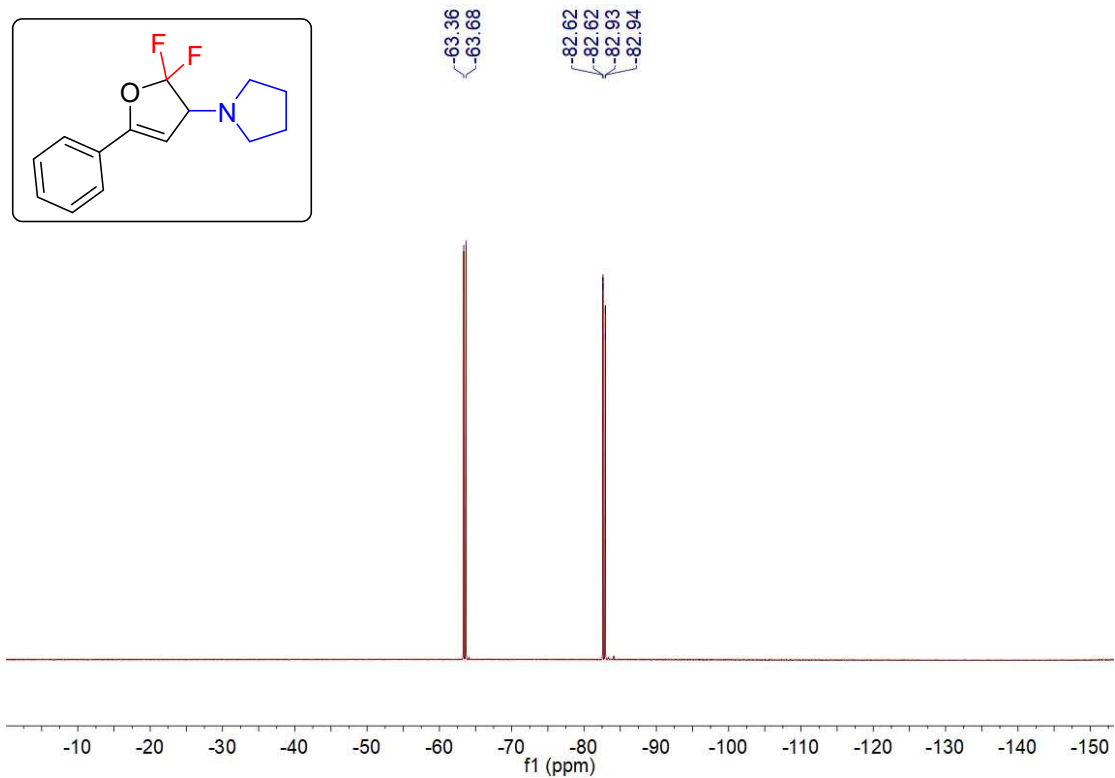

**<sup>1</sup>H spectrum (CDCl<sub>3</sub>) 1-(2,2-difluoro-5-phenyl-2,3-dihydrofuran-3-yl) piperidine (5b)**

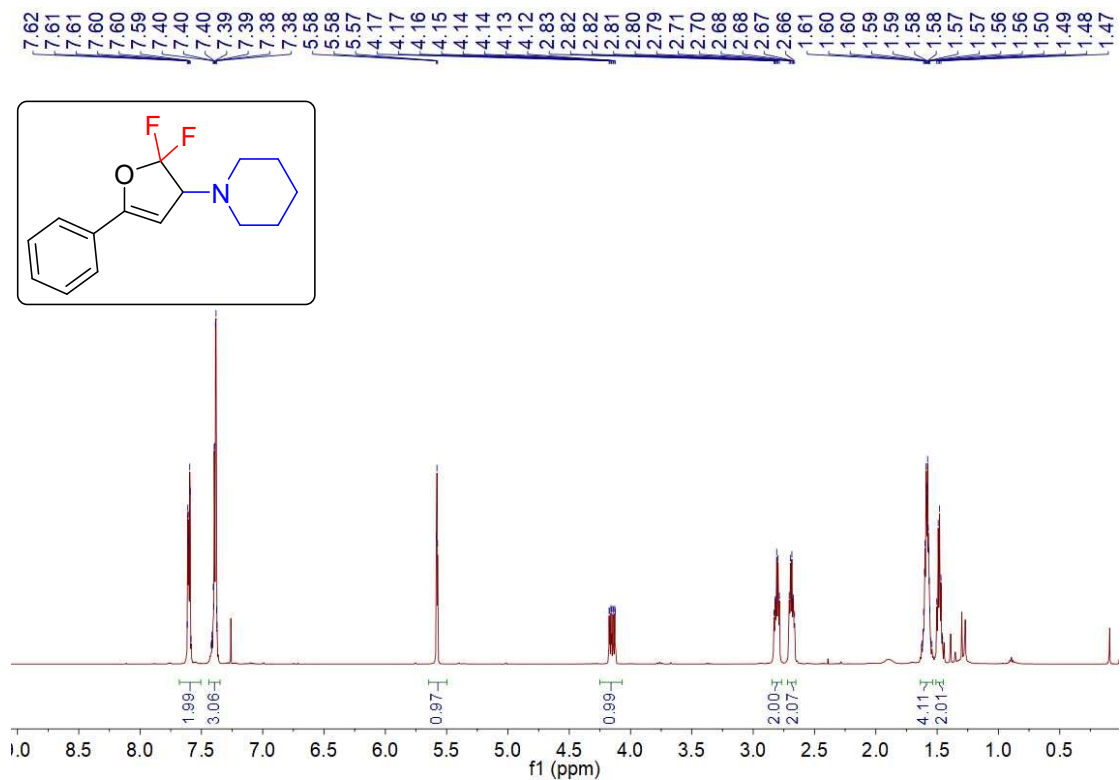

**<sup>13</sup>C spectrum (CDCl<sub>3</sub>) 1-(2,2-difluoro-5-phenyl-2,3-dihydrofuran-3-yl) piperidine (5b)**

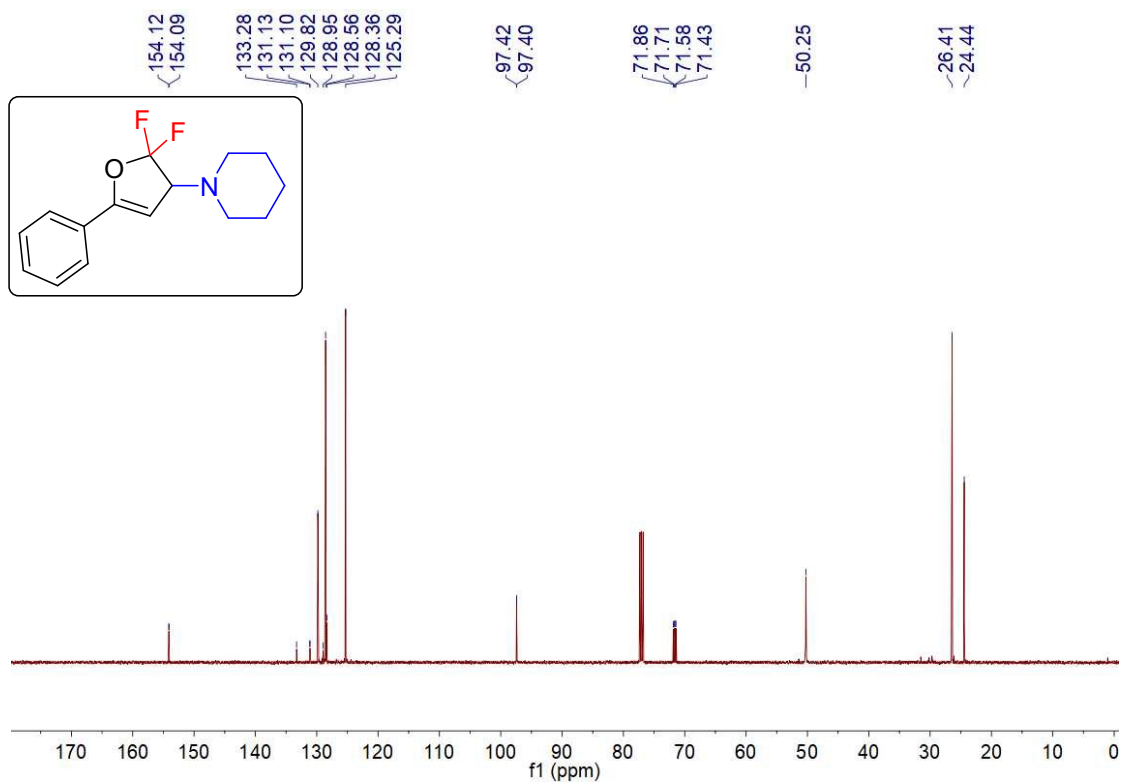

**<sup>19</sup>F spectrum (CDCl<sub>3</sub>) 1-(2,2-difluoro-5-phenyl-2,3-dihydrofuran-3-yl) piperidine (5b)**

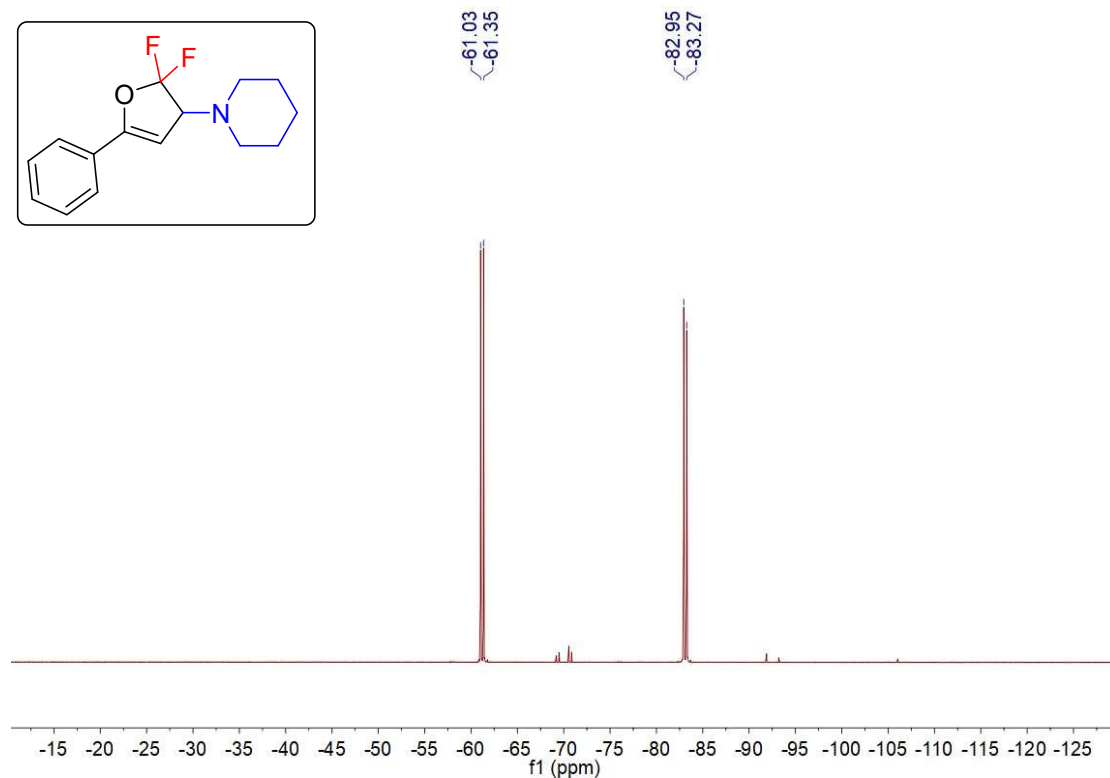

**<sup>1</sup>H spectrum (CDCl<sub>3</sub>) 4-(2,2-difluoro-5-phenyl-2,3-dihydrofuran-3-yl) morpholine (5c)**

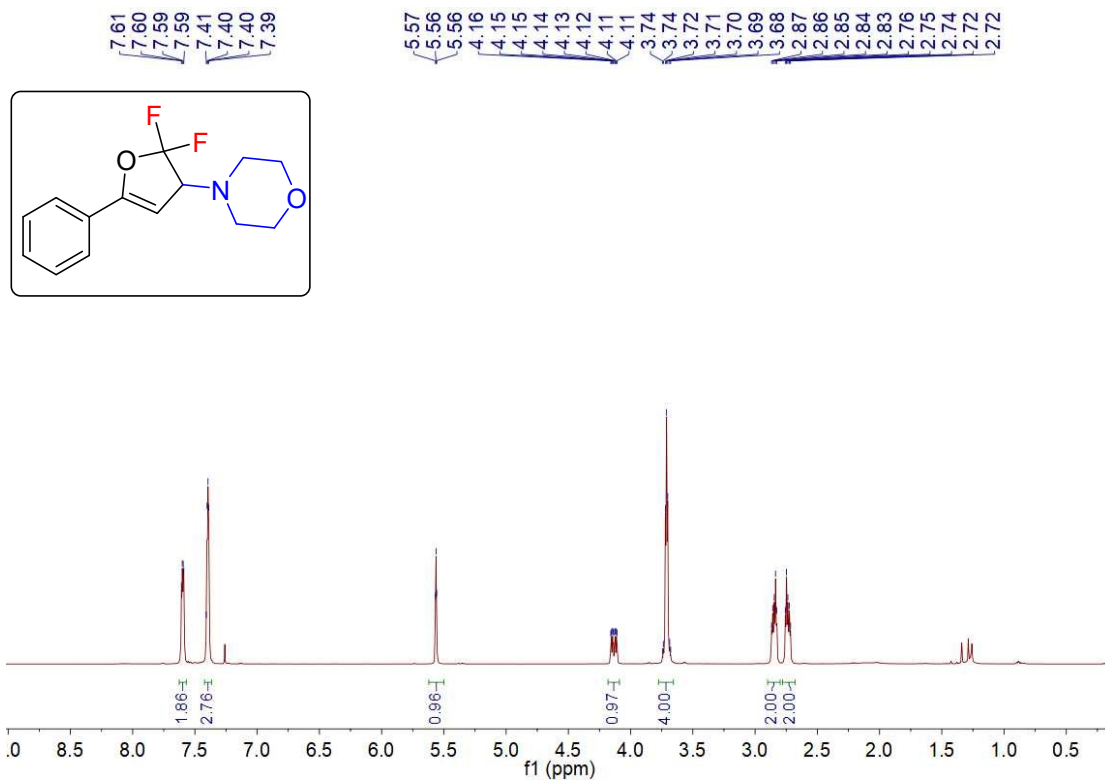

**<sup>13</sup>C spectrum (CDCl<sub>3</sub>) 4-(2,2-difluoro-5-phenyl-2,3-dihydrofuran-3-yl) morpholine (5c)**

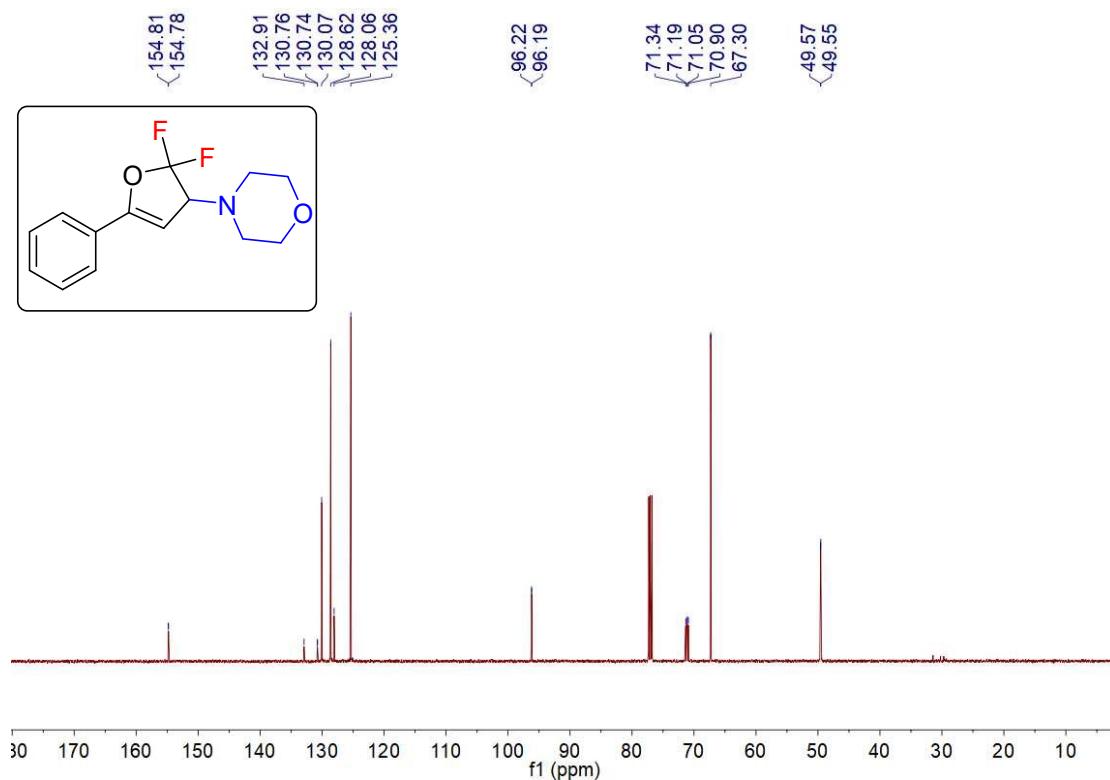

**<sup>19</sup>F spectrum (CDCl<sub>3</sub>) 4-(2,2-difluoro-5-phenyl-2,3-dihydrofuran-3-yl) morpholine (5c)**

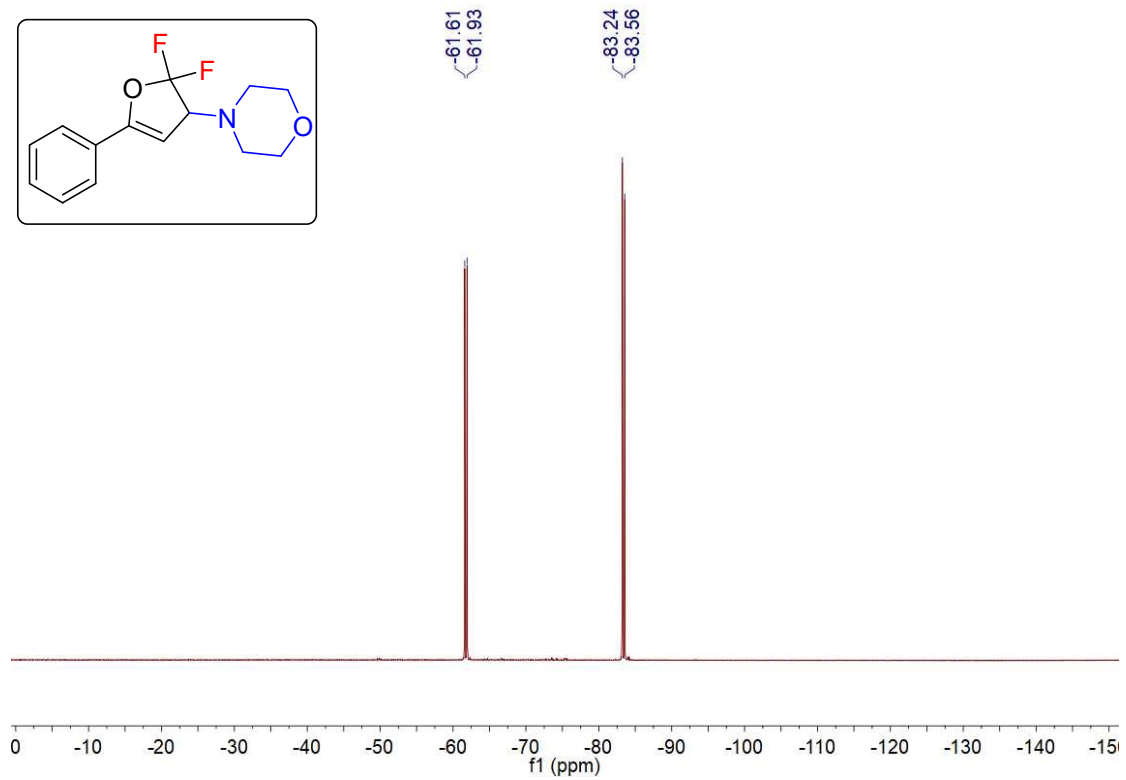

<sup>1</sup>H spectrum (CDCl<sub>3</sub>) 8-(2,2-difluoro-5-phenyl-2,3-dihydrofuran-3-yl)-1,4-dioxo-8-azaspiro[4.5]decane (5d)

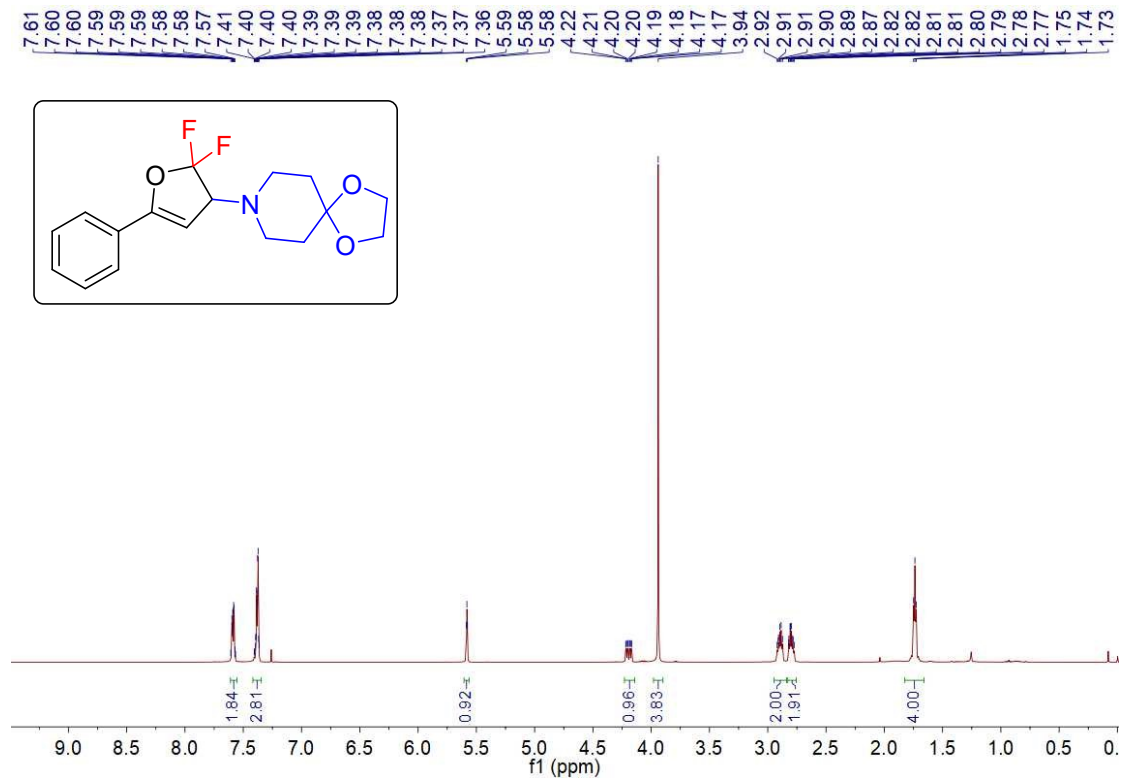

<sup>13</sup>C spectrum (CDCl<sub>3</sub>) 8-(2,2-difluoro-5-phenyl-2,3-dihydrofuran-3-yl)-1,4-dioxo-8-azaspiro[4.5]decane (5d)

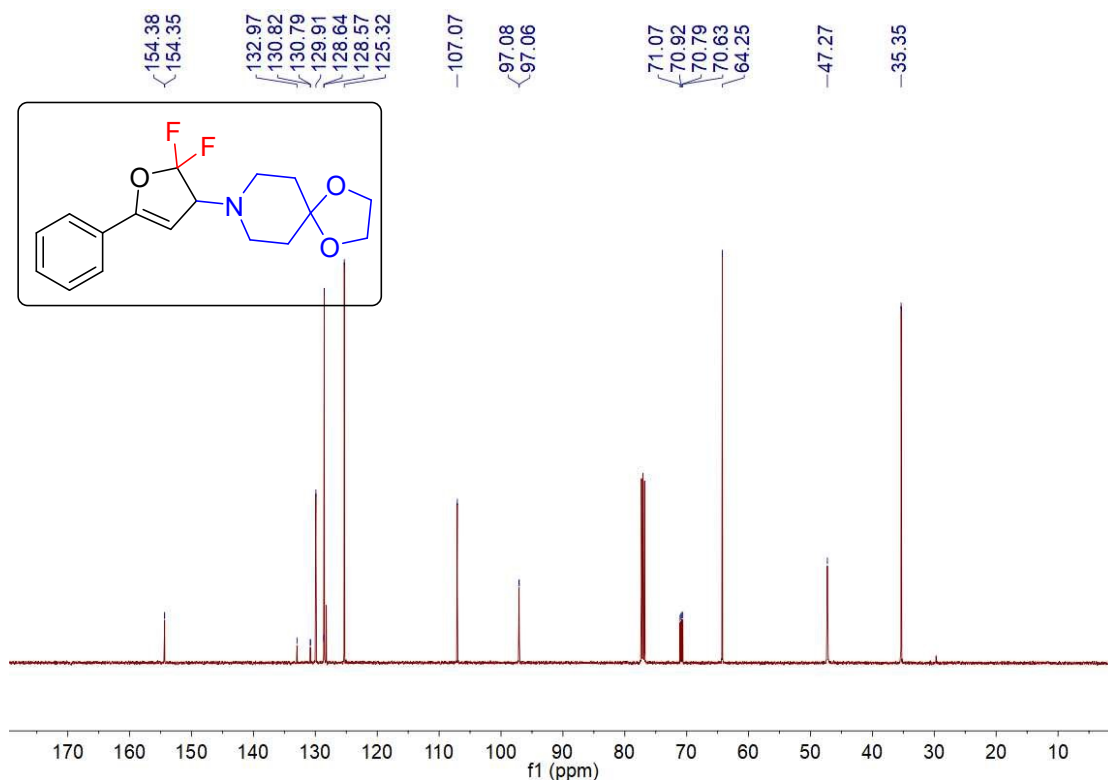

**<sup>19</sup>F spectrum (CDCl<sub>3</sub>) 8-(2,2-difluoro-5-phenyl-2,3-dihydrofuran-3-yl)-1,4-dioxaspiro [4.5]decane (5d)**

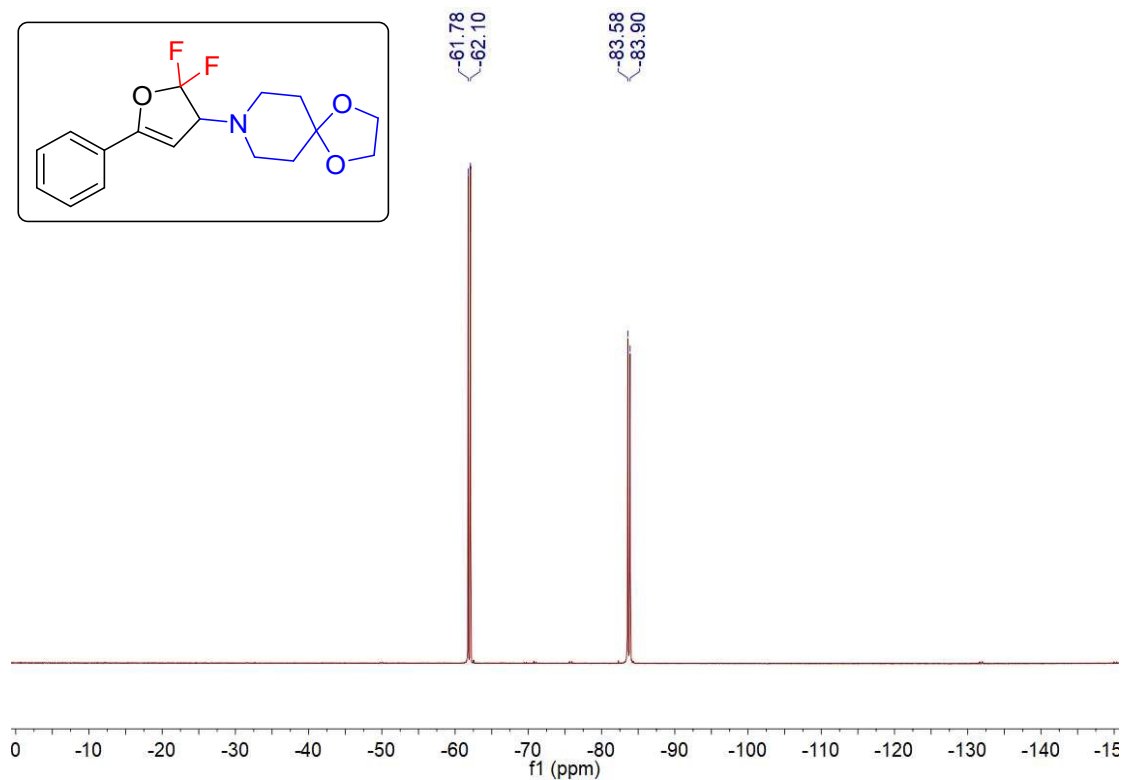

**<sup>1</sup>H spectrum (CDCl<sub>3</sub>) N-cyclohexyl-2,2-difluoro-N-methyl-5-phenyl-2,3-dihydrofuran-3-amine (5e)**



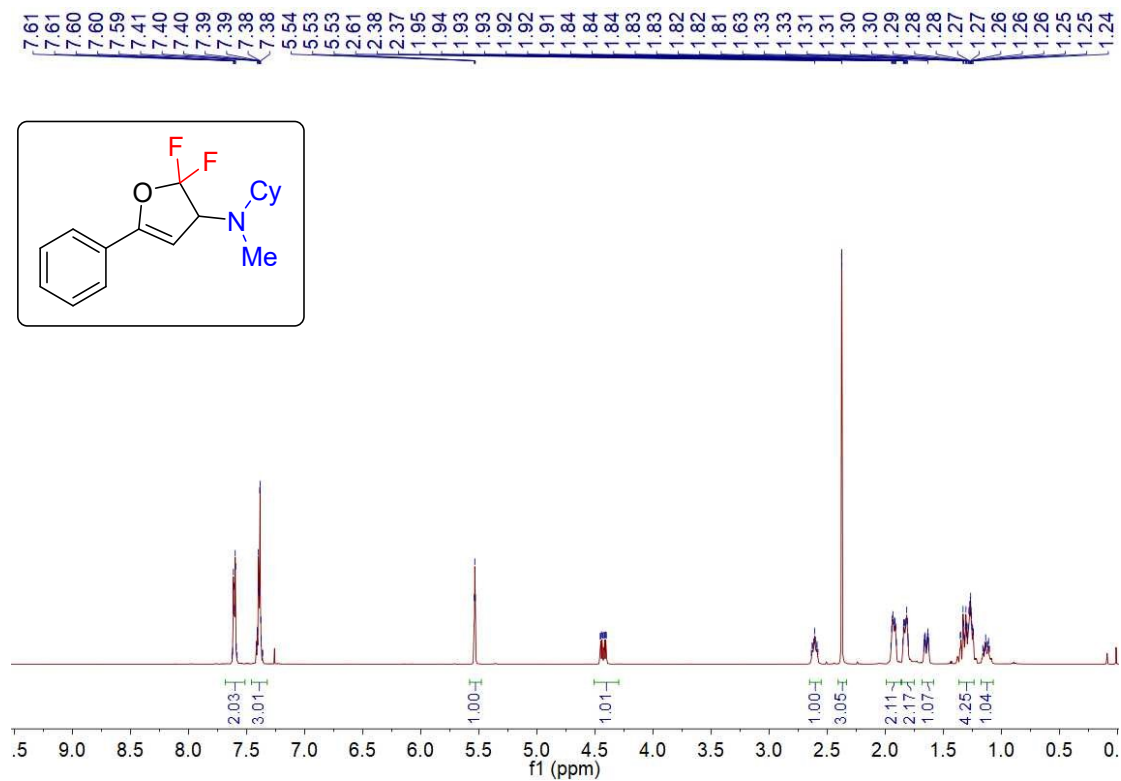

<sup>13</sup>C spectrum (CDCl<sub>3</sub>) N-cyclohexyl-2,2-difluoro-N-methyl-5-phenyl-2,3-dihydrofuran-3-amine (5e)

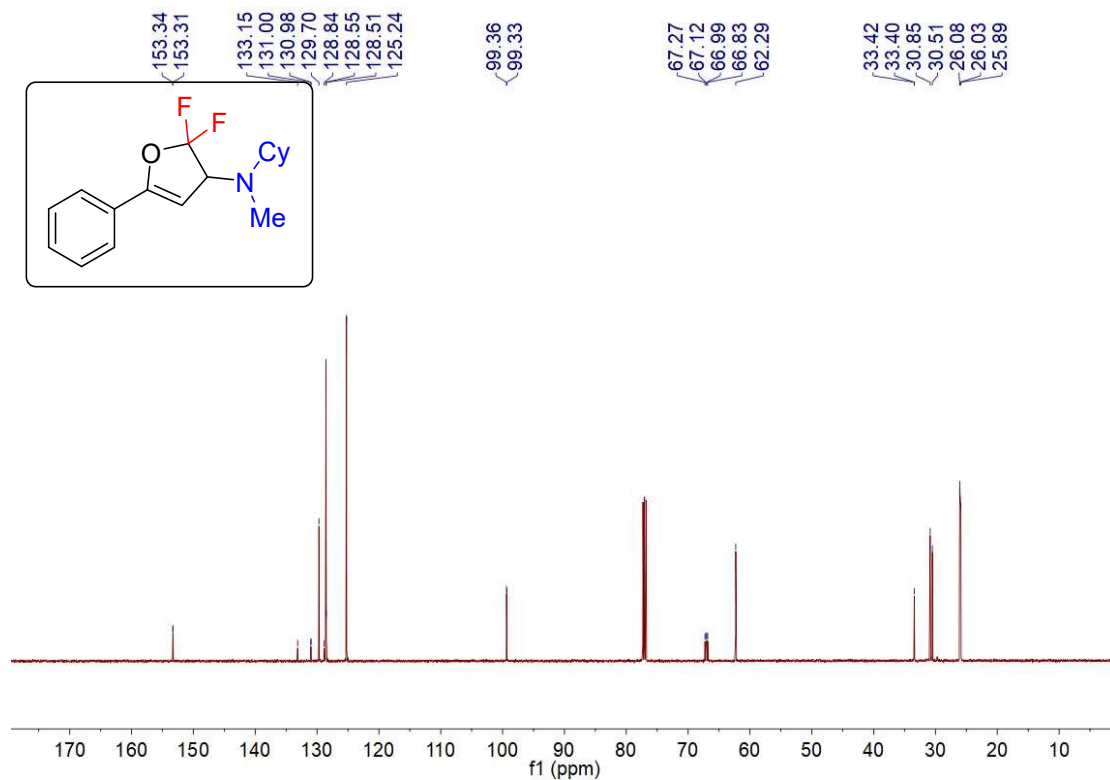

<sup>19</sup>F spectrum (CDCl<sub>3</sub>) N-cyclohexyl-2,2-difluoro-N-methyl-5-phenyl-2,3-dihydrofuran-3-amine (5e)

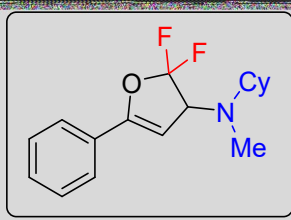

**<sup>1</sup>H spectrum (CDCl<sub>3</sub>) N-(2,2-dimethoxyethyl)-2,2-difluoro-N-methyl-5-phenyl-2,3-dihydrofuran-3-amine(5f)**

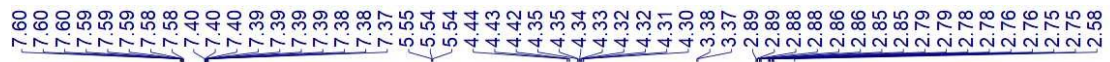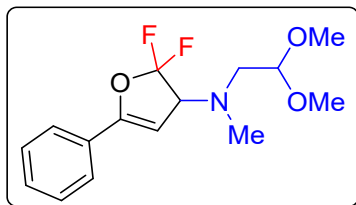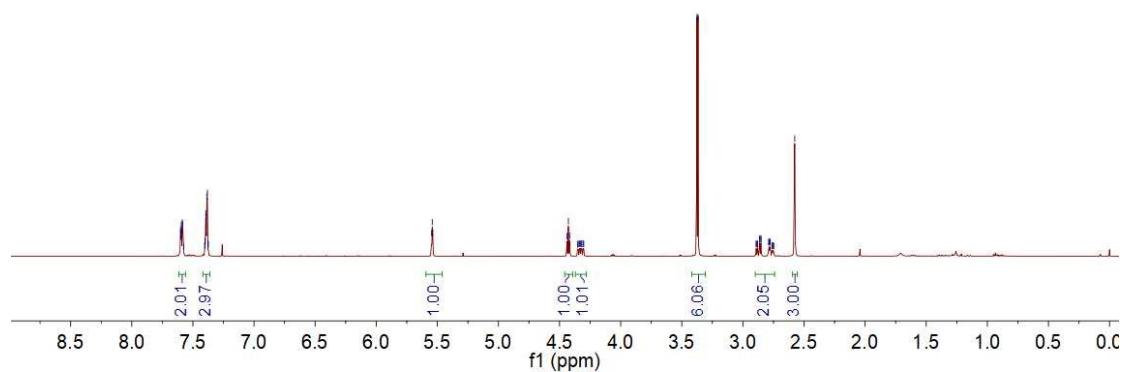

**<sup>13</sup>C spectrum (CDCl<sub>3</sub>) N-(2,2-dimethoxyethyl)-2,2-difluoro-N-methyl-5-phenyl-2,3-dihydrofuran-3-amine (5f)**

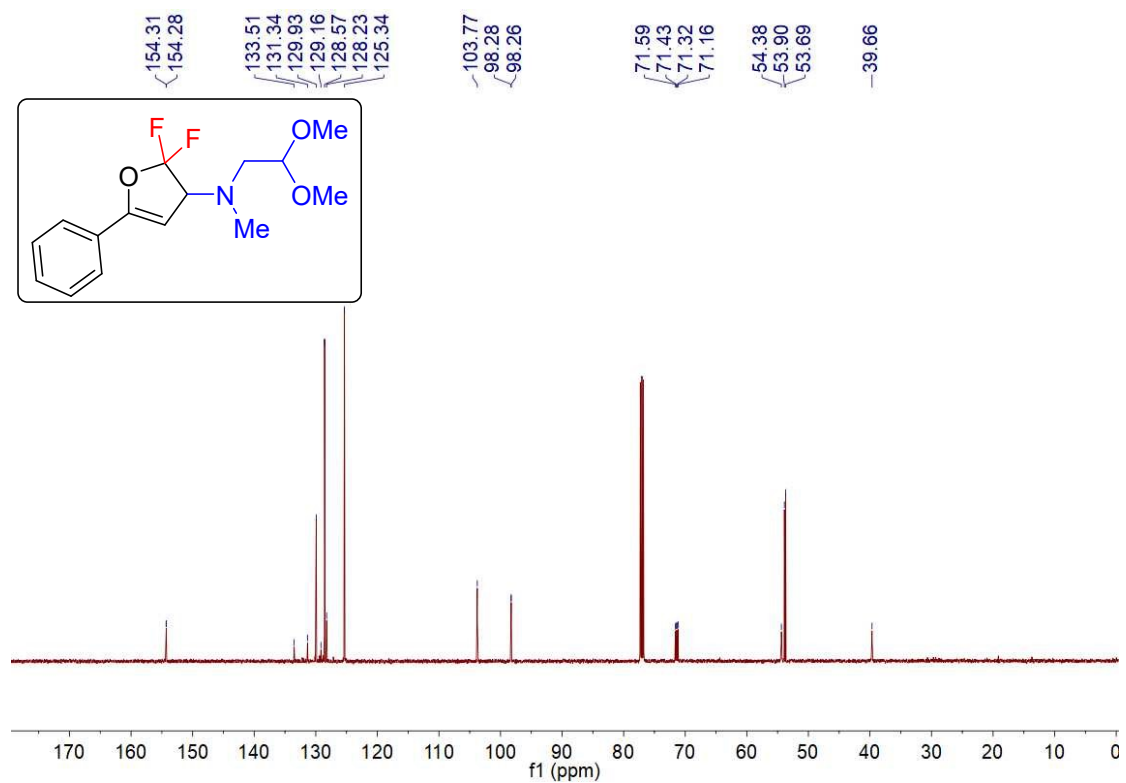

**<sup>19</sup>F spectrum (CDCl<sub>3</sub>) N-(2,2-dimethoxyethyl)-2,2-difluoro-N-methyl-5-phenyl-2,3-dihydrofuran-3-amine (5f)**

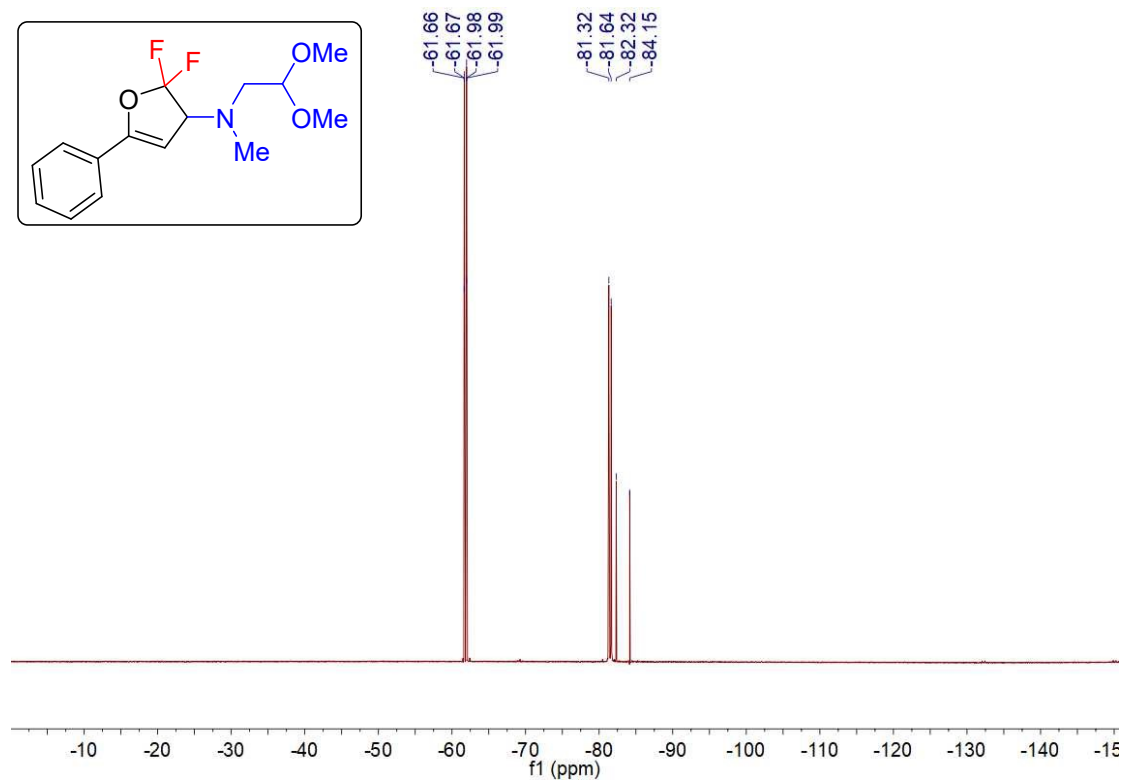

**<sup>1</sup>H spectrum (CDCl<sub>3</sub>) N,N-diethyl-2,2-difluoro-5-phenyl-2,3-dihydrofuran-3-amine (5g)**

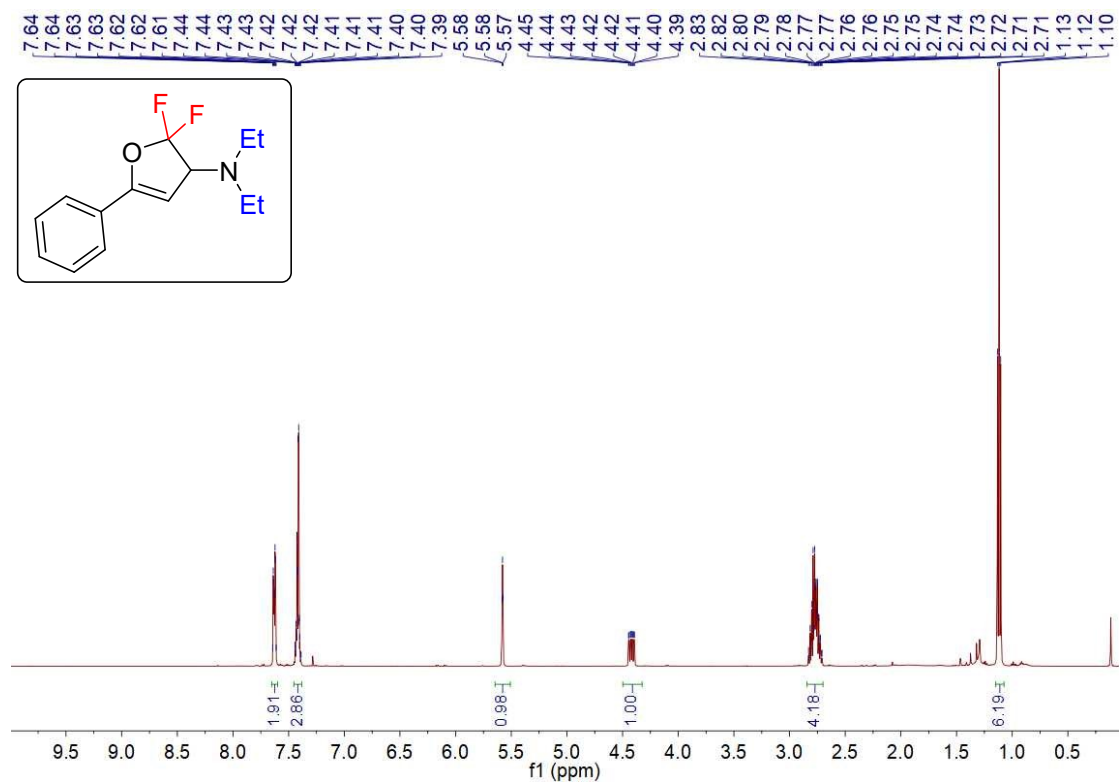

**<sup>13</sup>C spectrum (CDCl<sub>3</sub>) N,N-diethyl-2,2-difluoro-5-phenyl-2,3-dihydrofuran-3-amine (5g)**

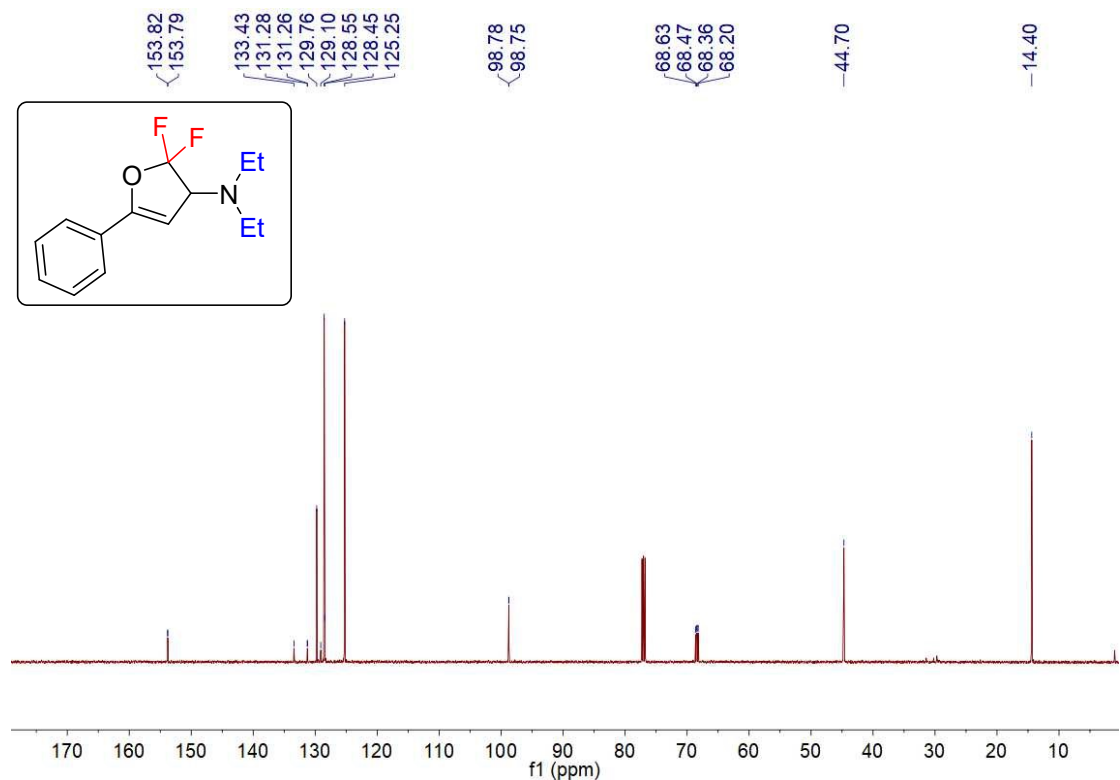

**<sup>19</sup>F spectrum (CDCl<sub>3</sub>) N,N-diethyl-2,2-difluoro-5-phenyl-2,3-dihydrofuran-3-amine (5g)**

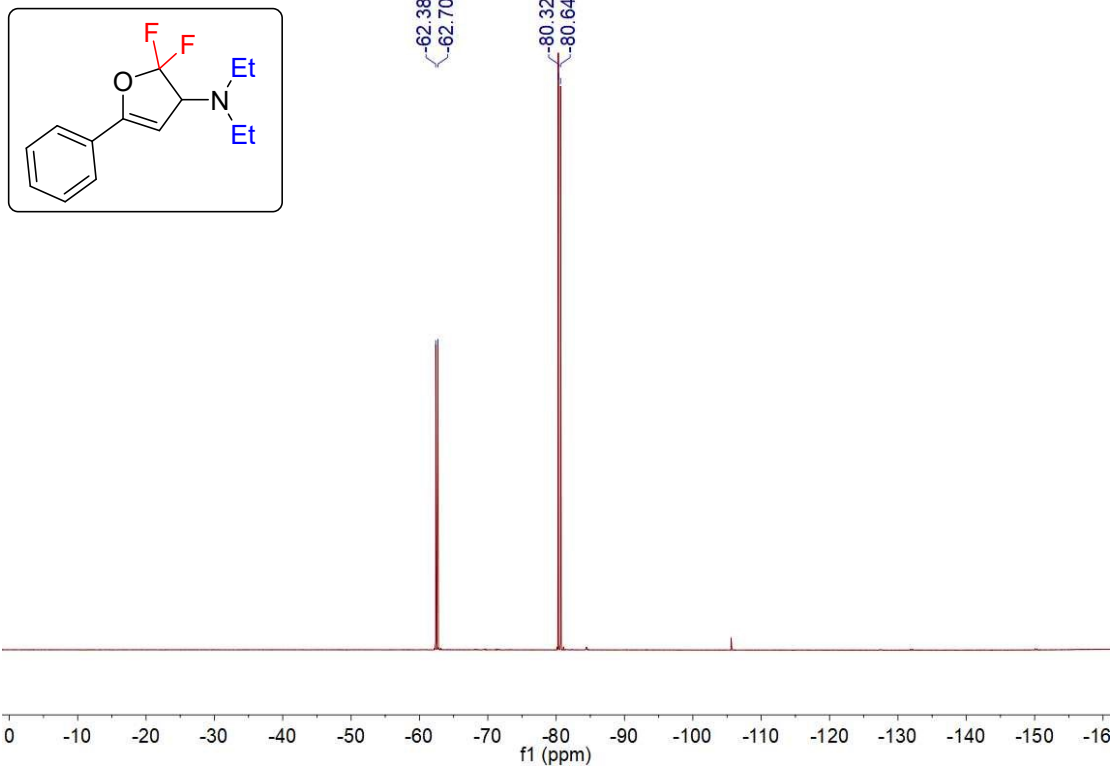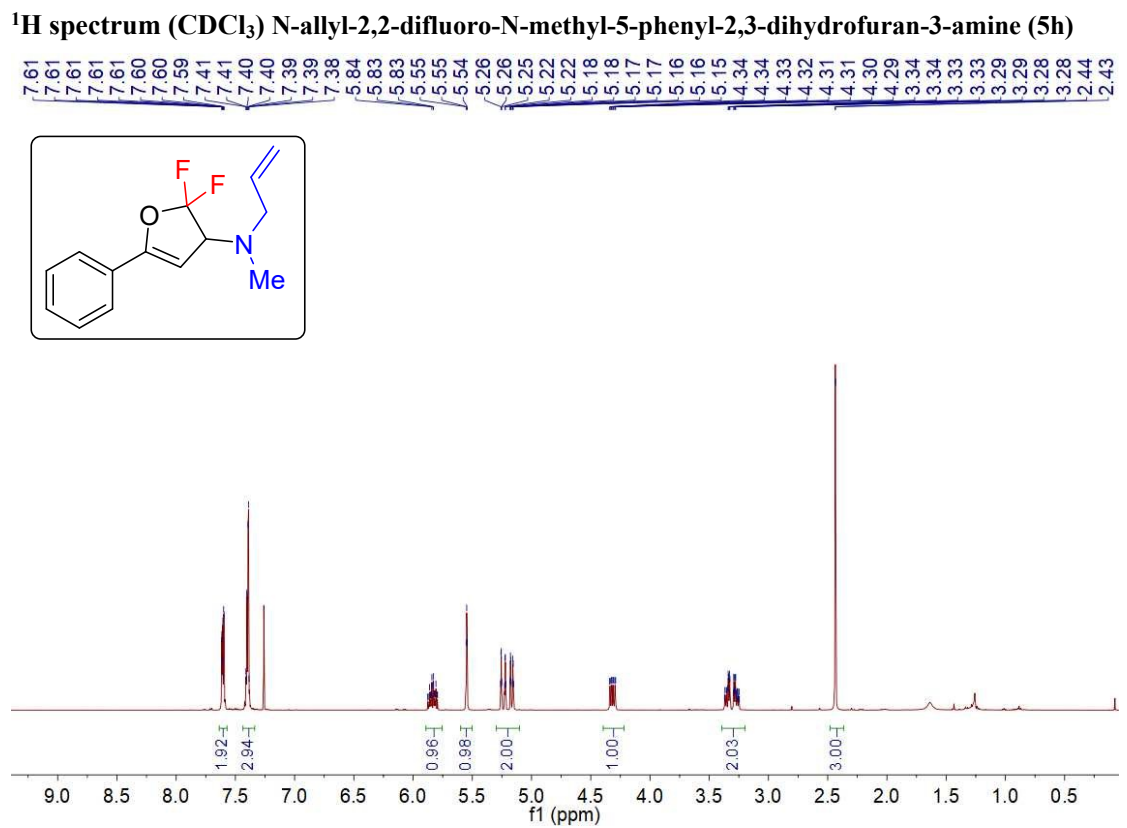

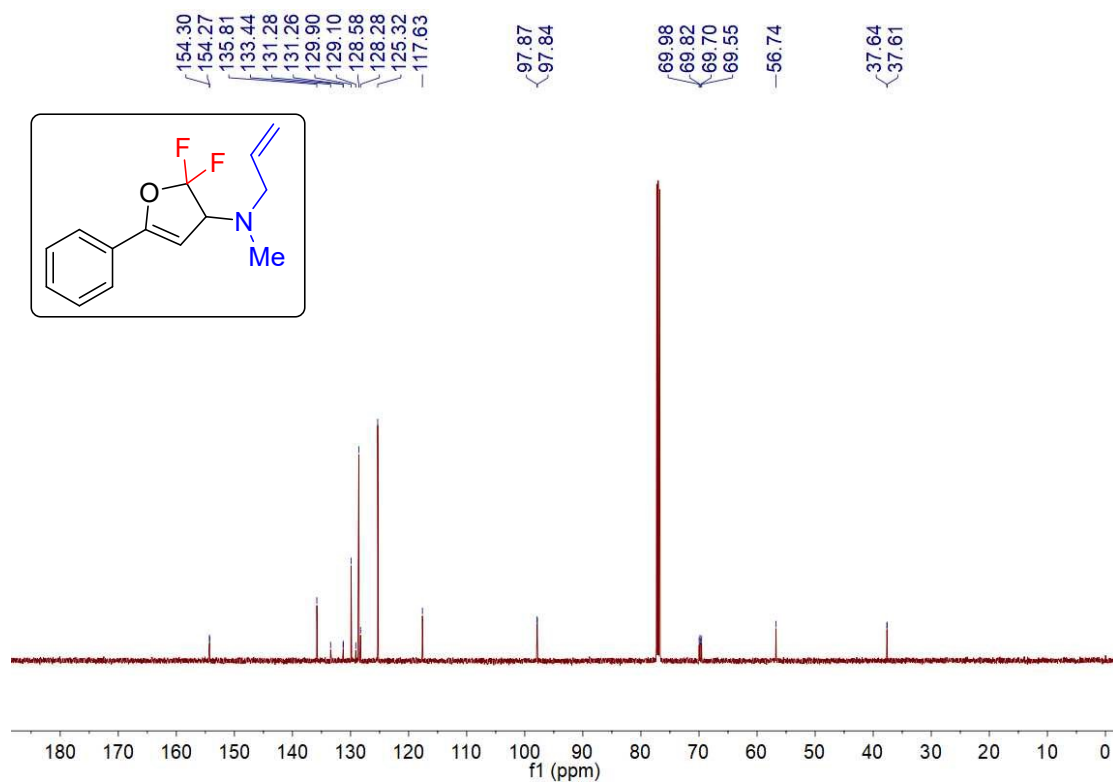

**<sup>19</sup>F spectrum (CDCl<sub>3</sub>) N-allyl-2,2-difluoro-N-methyl-5-phenyl-2,3-dihydrofuran-3-amine (5h)**

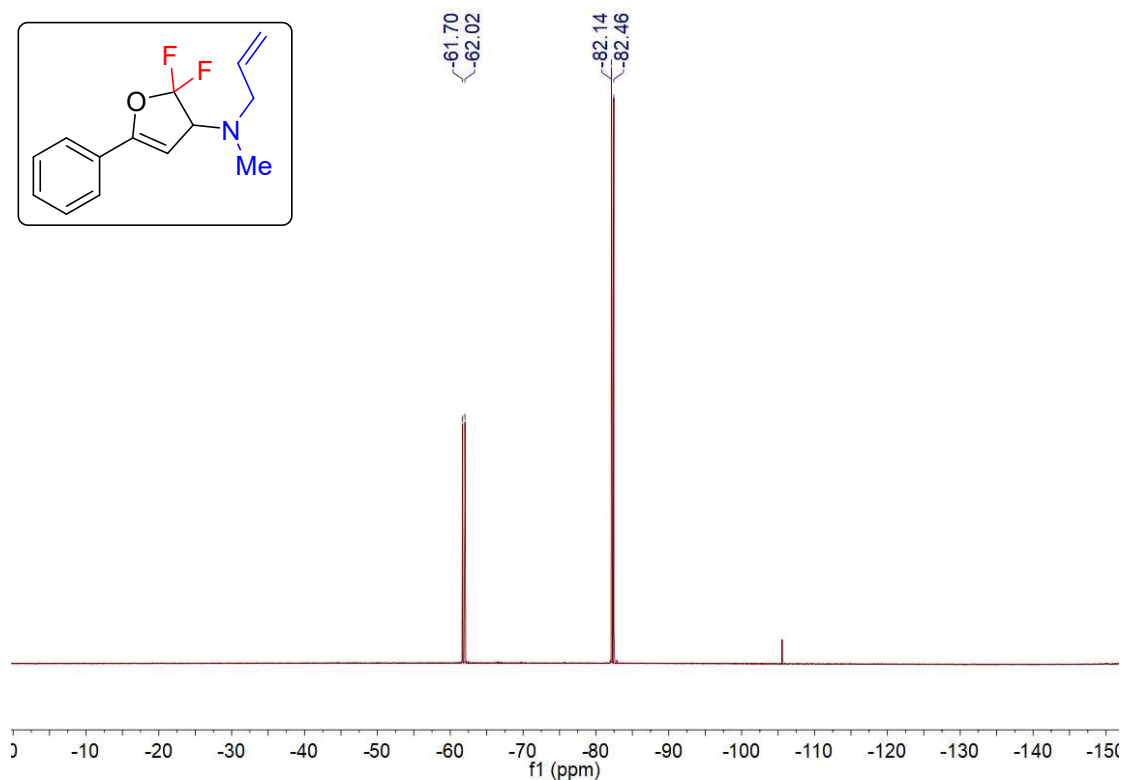

**<sup>1</sup>H spectrum (CDCl<sub>3</sub>) N,N-diallyl-2,2-difluoro-5-phenyl-2,3-dihydrofuran-3-amine (5i)**

7.64  
7.64  
7.63  
7.62  
7.62  
7.44  
7.44  
7.43  
7.42  
7.42  
7.41  
7.41  
5.88  
5.86  
5.86  
5.85  
5.85  
5.83  
5.56  
5.56  
5.55  
5.55  
5.29  
5.29  
5.29  
5.28  
5.26  
5.25  
5.25  
5.20  
5.20  
5.20  
5.18  
5.18  
5.18  
3.41  
3.41  
3.40  
3.40  
3.39  
3.38  
3.38  
3.37  
3.37  
3.32  
3.31  
3.30  
3.28

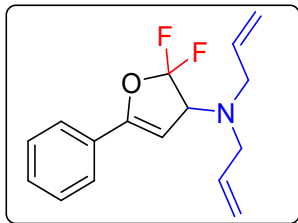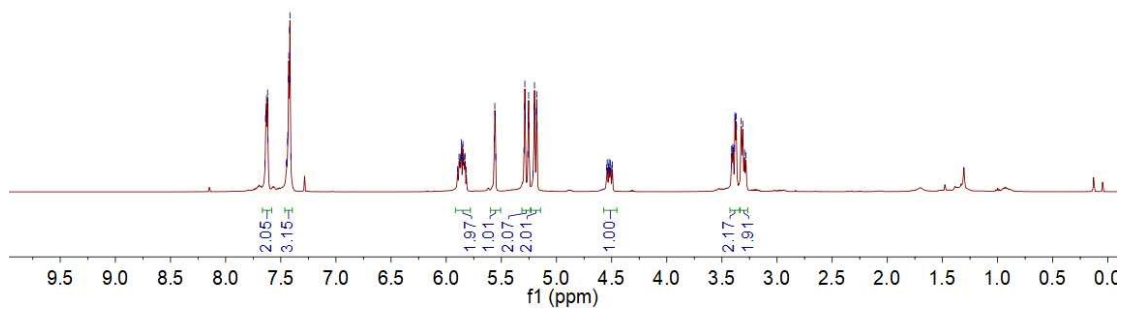

<sup>13</sup>C spectrum (CDCl<sub>3</sub>) N,N-diallyl-2,2-difluoro-5-phenyl-2,3-dihydrofuran-3-amine (5i)

7.64  
7.64  
7.63  
7.62  
7.62  
7.44  
7.44  
7.43  
7.42  
7.42  
7.41  
7.41  
5.88  
5.86  
5.86  
5.85  
5.85  
5.83  
5.56  
5.56  
5.55  
5.55  
5.29  
5.29  
5.29  
5.28  
5.26  
5.25  
5.25  
5.20  
5.20  
5.20  
5.18  
5.18  
5.18  
3.41  
3.41  
3.40  
3.40  
3.39  
3.38  
3.38  
3.37  
3.37  
3.32  
3.31  
3.30  
3.28

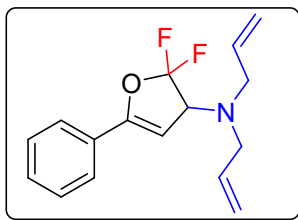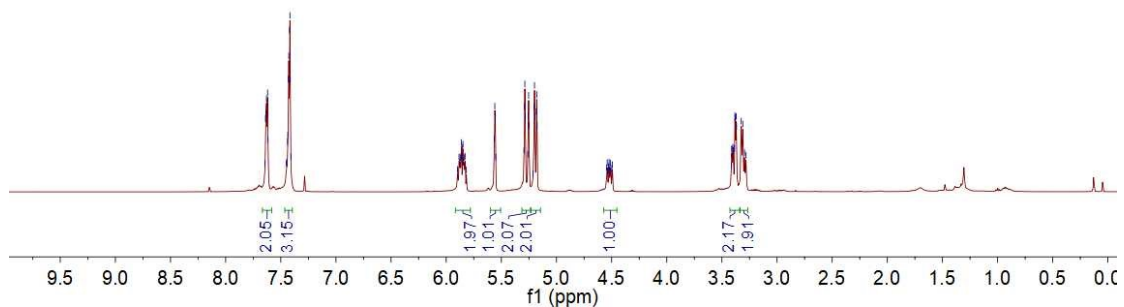

<sup>19</sup>F spectrum (CDCl<sub>3</sub>) N,N-diallyl-2,2-difluoro-5-phenyl-2,3-dihydrofuran-3-amine (5i)

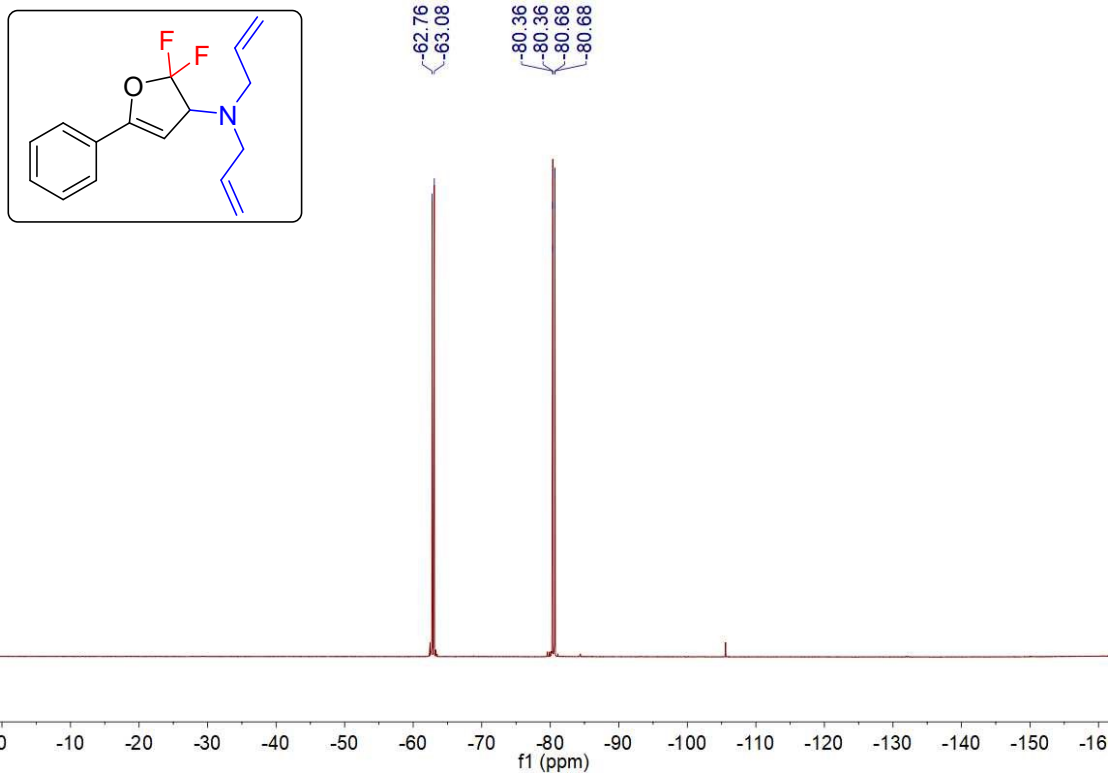

<sup>1</sup>H spectrum (CDCl<sub>3</sub>) N-butyl-2,2-difluoro-N,5-diphenyl-2,3-dihydrofuran-3-amine (5j)

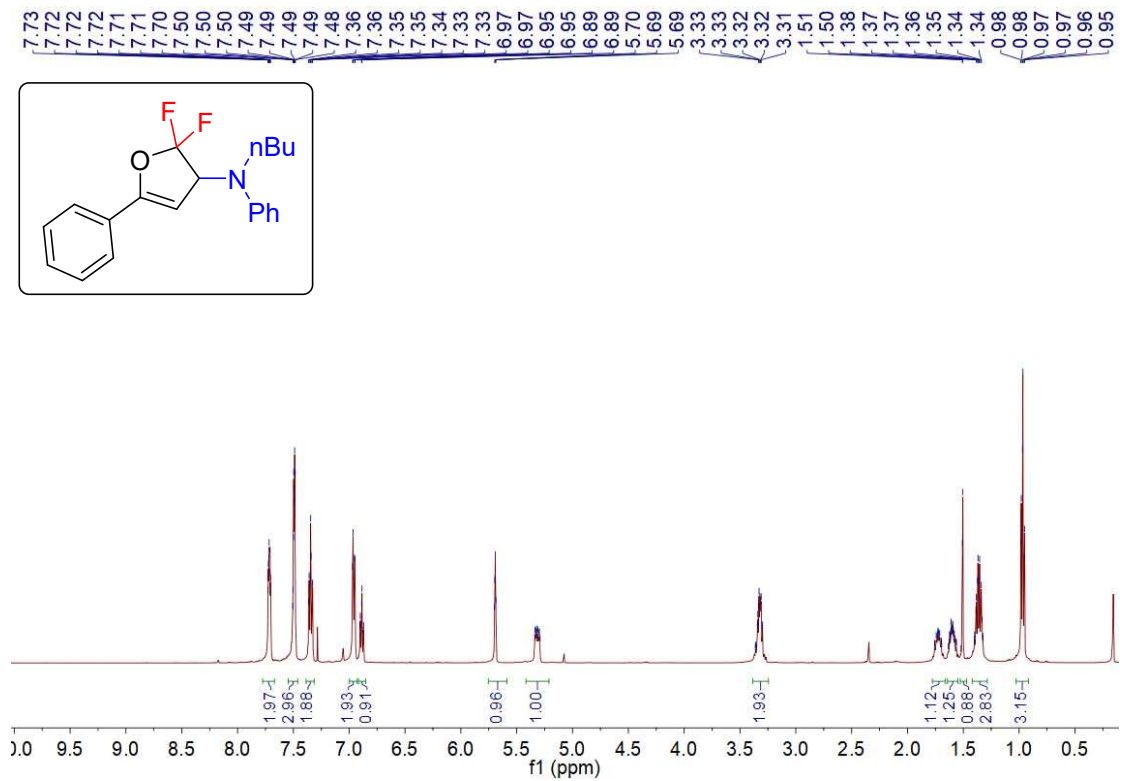

<sup>13</sup>C spectrum (CDCl<sub>3</sub>) N-butyl-2,2-difluoro-N,5-diphenyl-2,3-dihydrofuran-3-amine (5j)



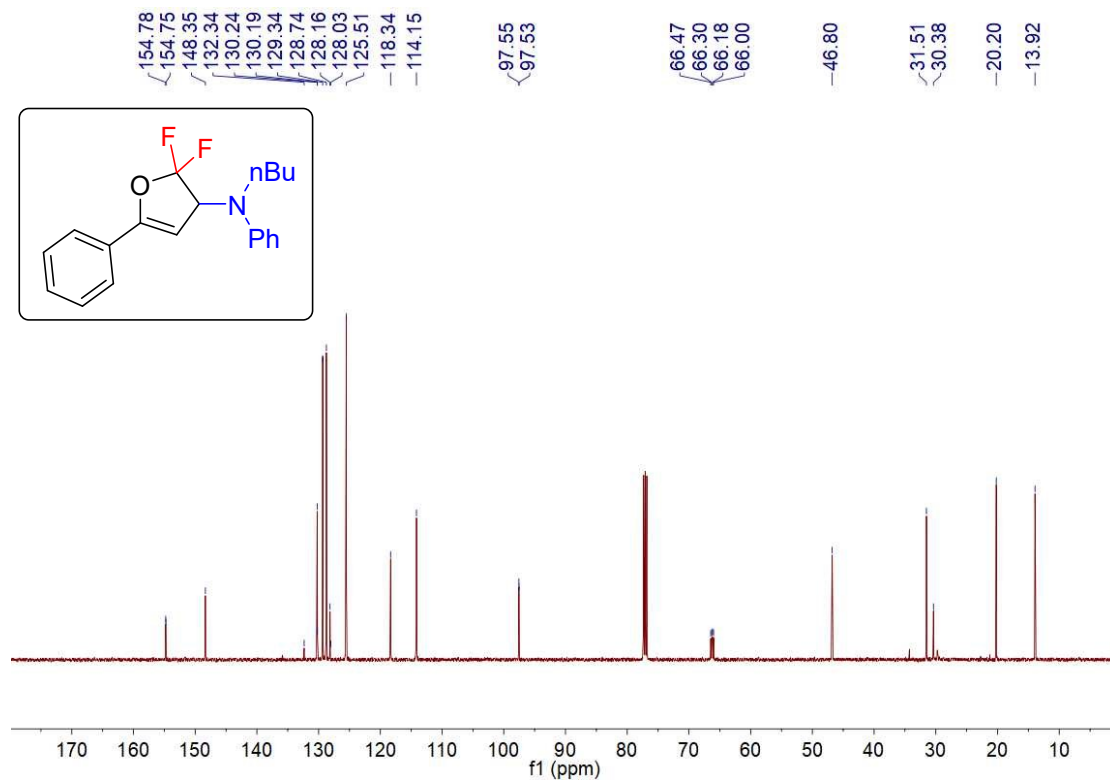

**<sup>19</sup>F spectrum (CDCl<sub>3</sub>) N-butyl-2,2-difluoro-N,5-diphenyl-2,3-dihydrofuran-3-amine (5j)**

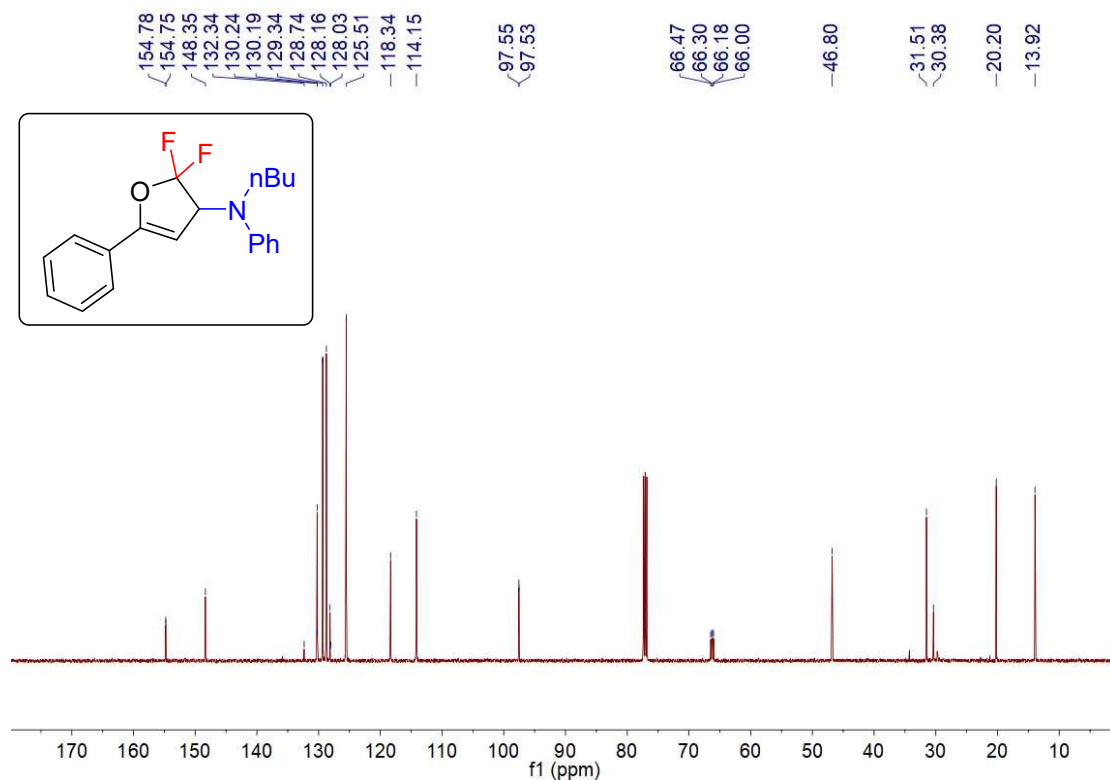

**<sup>1</sup>H spectrum (CDCl<sub>3</sub>) N-ethyl-2,2-difluoro-N,5-diphenyl-2,3-dihydrofuran-3-amine (5k)**

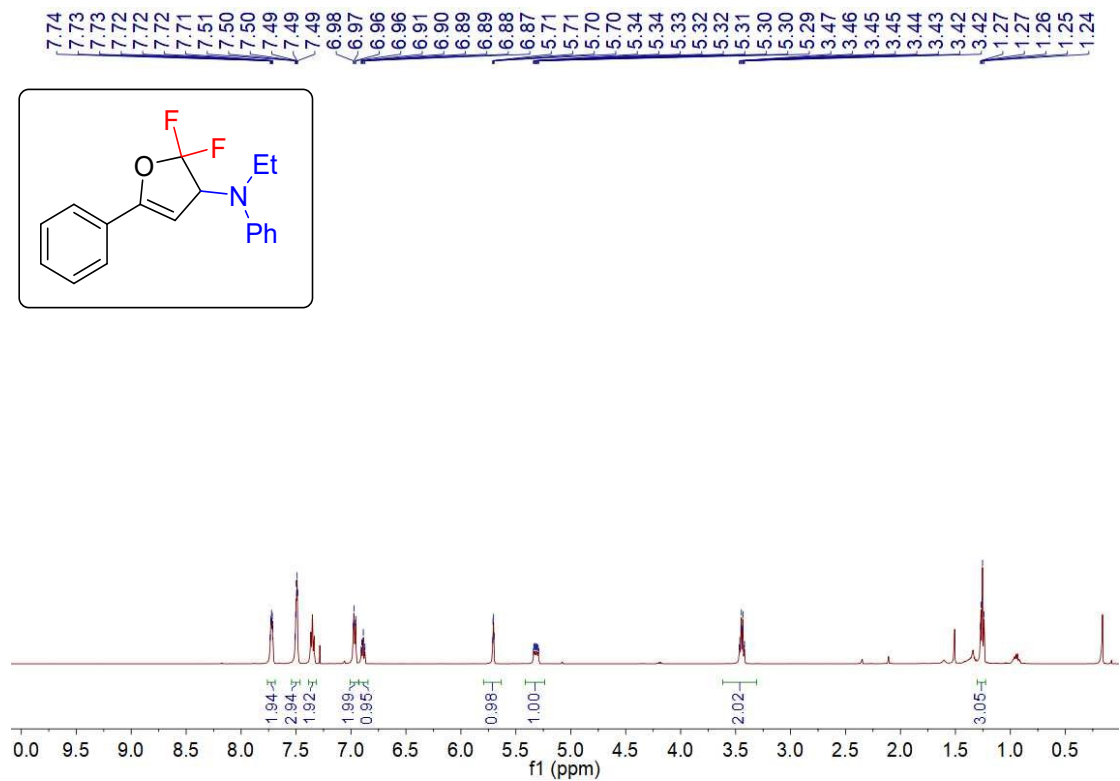

<sup>13</sup>C spectrum (CDCl<sub>3</sub>) N-ethyl-2,2-difluoro-N,5-diphenyl-2,3-dihydrofuran-3-amine (5k)

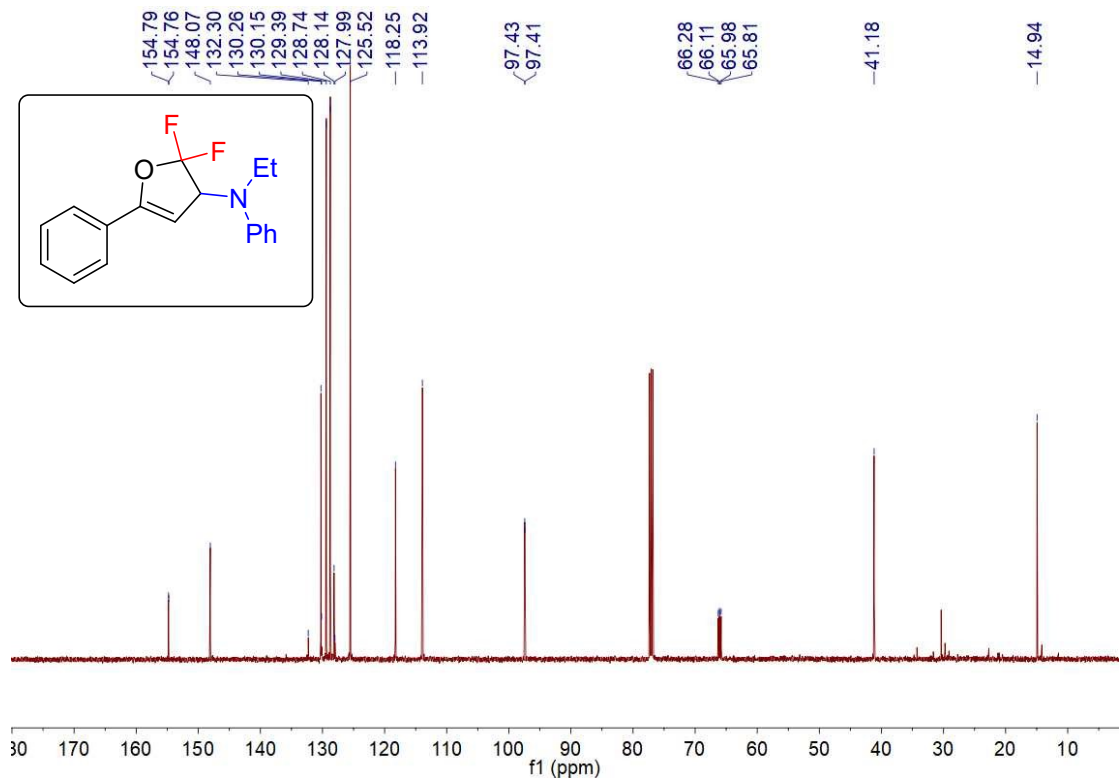

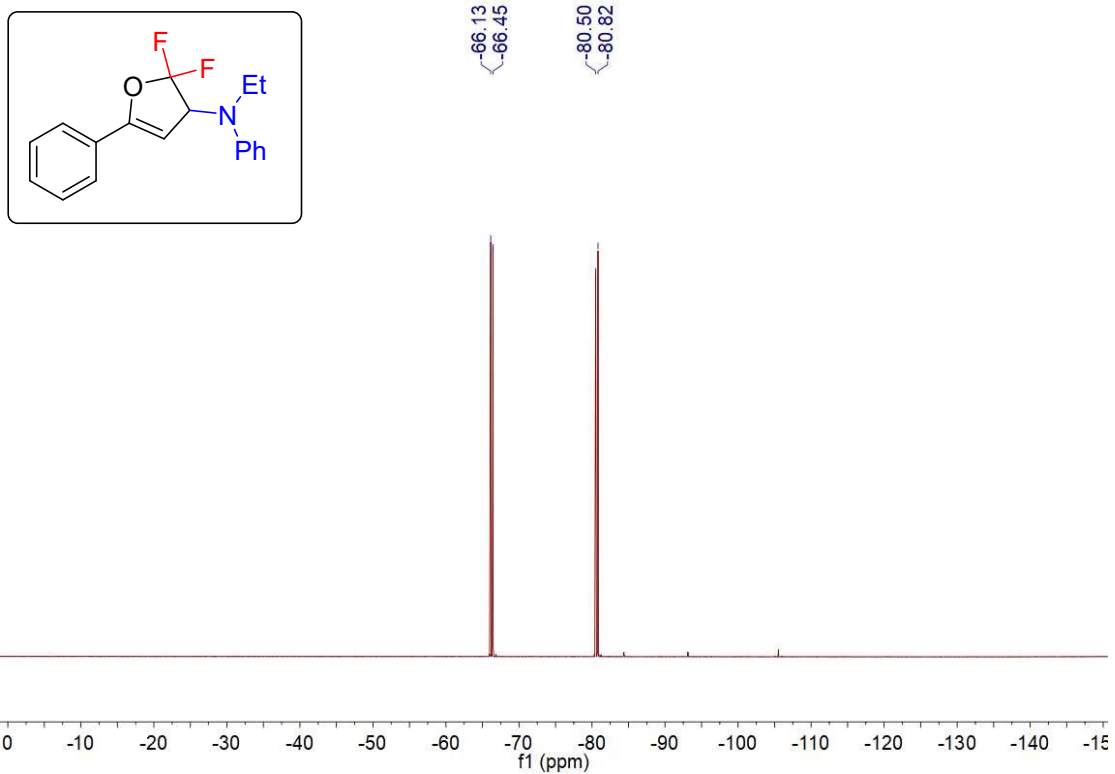

$^1\text{H}$  spectrum (CDCl<sub>3</sub>) 2,2-difluoro-N,N-diisopropyl-5-phenyl-2,3-dihydrofuran-3-amine (5I)

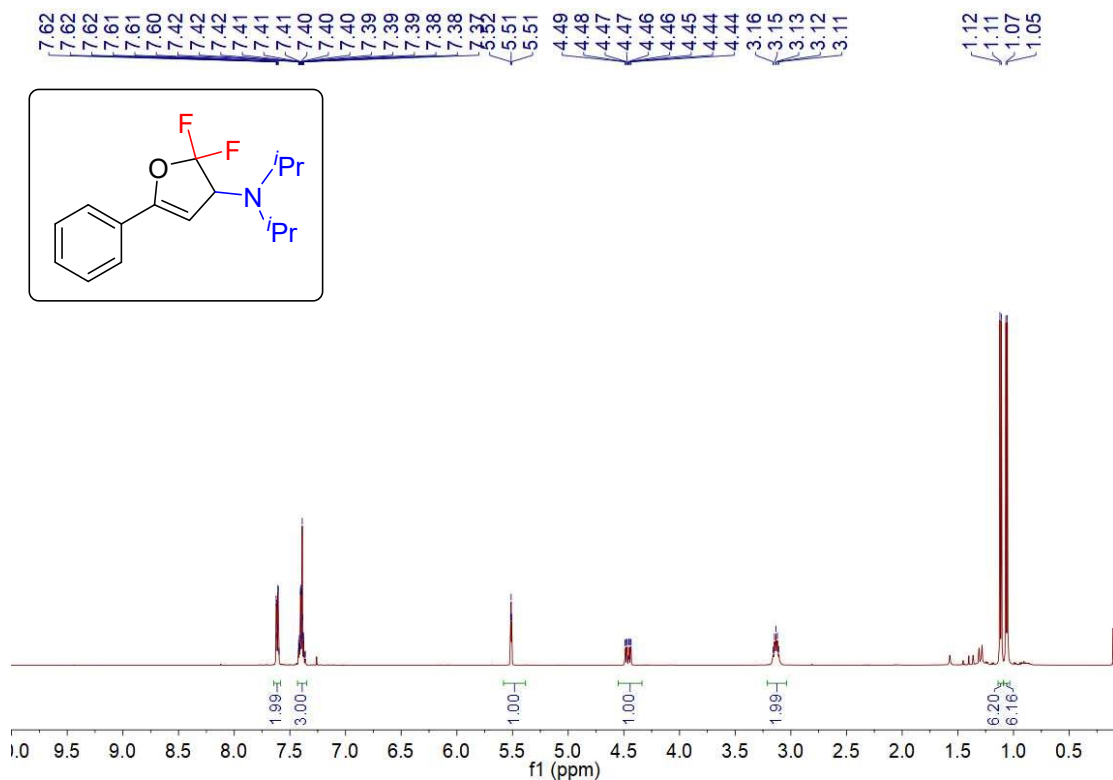

$^{13}\text{C}$  spectrum (CDCl<sub>3</sub>) 2,2-difluoro-N,N-diisopropyl-5-phenyl-2,3-dihydrofuran-3-amine (5I)

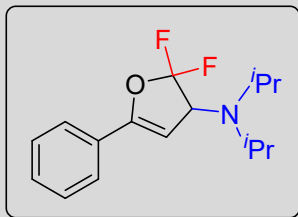

$^{19}\text{F}$  spectrum ( $\text{CDCl}_3$ ) 2,2-difluoro-N,N-diisopropyl-5-phenyl-2,3-dihydrofuran-3-amine (5l)

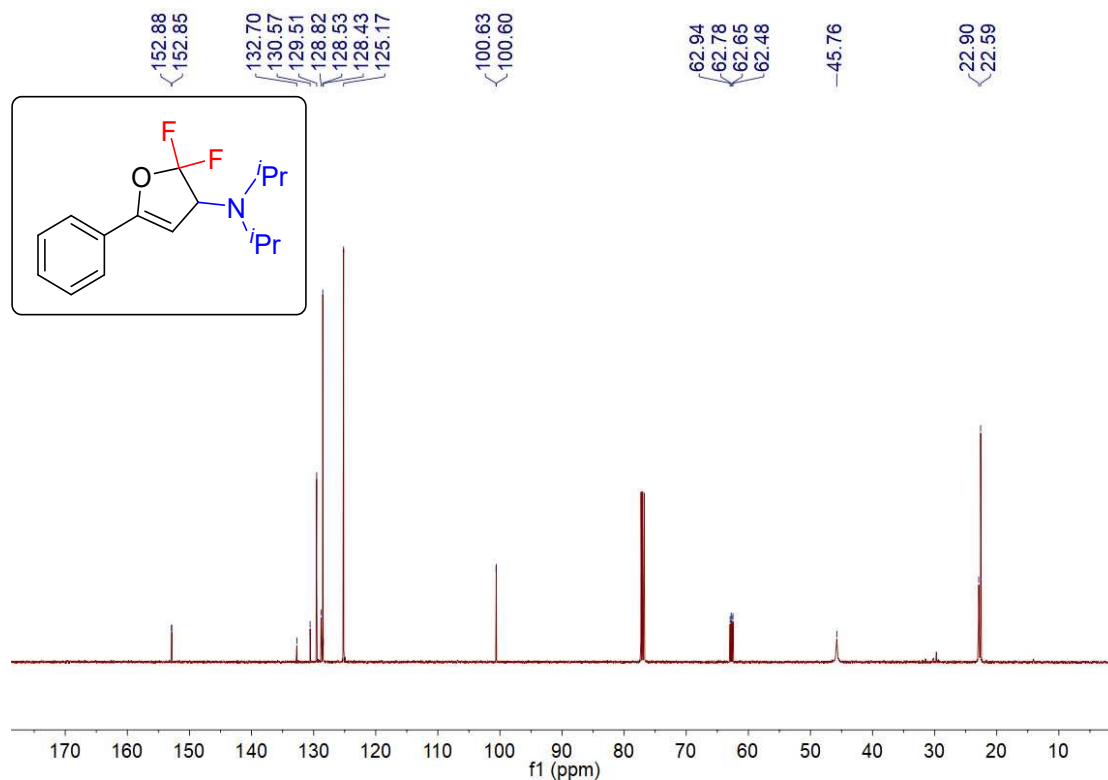

$^1\text{H}$  spectrum ( $\text{CDCl}_3$ ) tert-butyl 4-(2,2-difluoro-5-phenyl-2,3-dihydrofuran-3-yl)piperazine-1-carboxylate (5m)

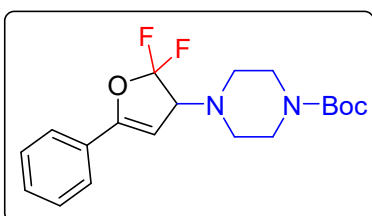

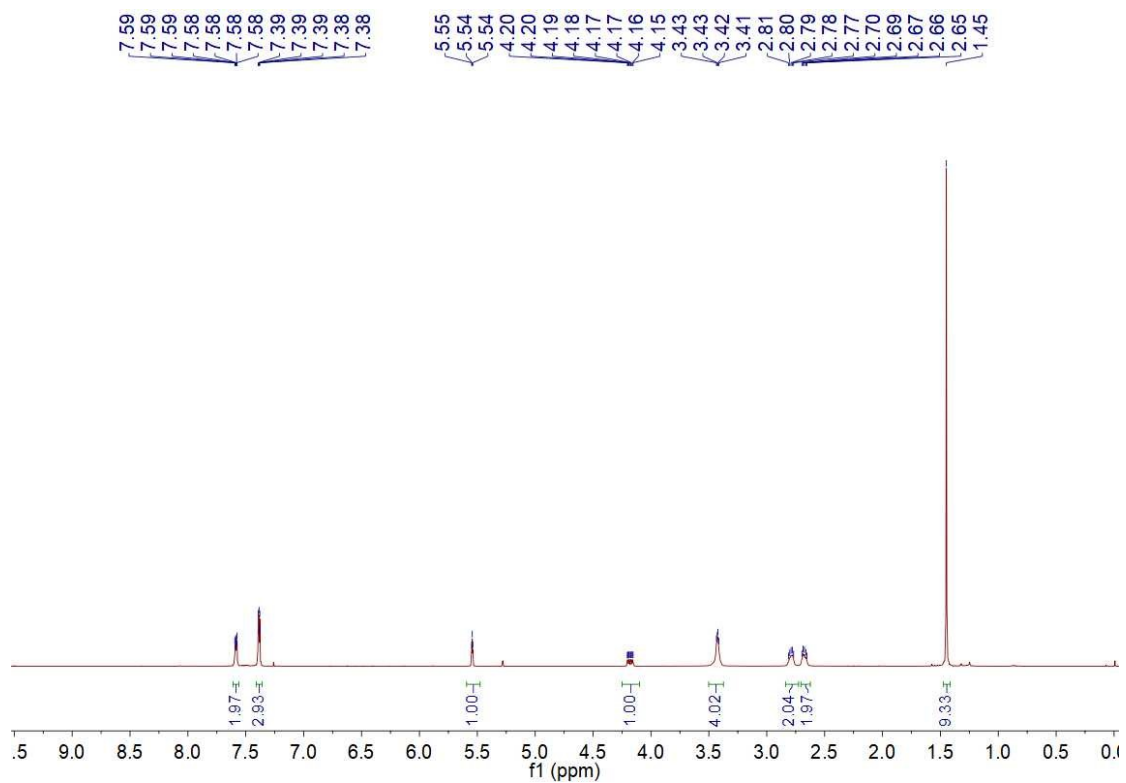

**<sup>13</sup>C spectrum (CDCl<sub>3</sub>) tert-butyl 4-(2,2-difluoro-5-phenyl-2,3-dihydrofuran-3-yl)piperazine-1-carboxylate (5m)**

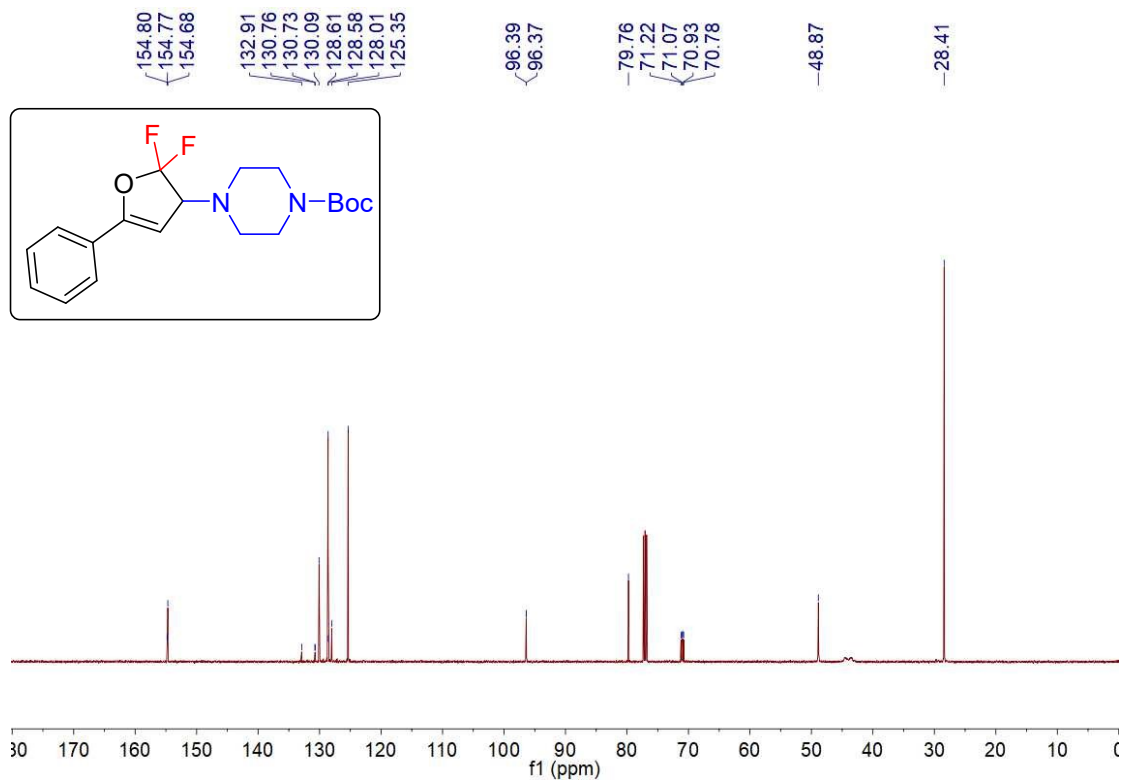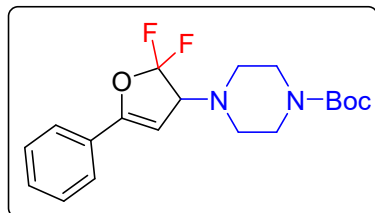

**<sup>19</sup>F spectrum (CDCl<sub>3</sub>) tert-butyl 4-(2,2-difluoro-5-phenyl-2,3-dihydrofuran-3-yl)piperazine-1-carboxylate (5m)**

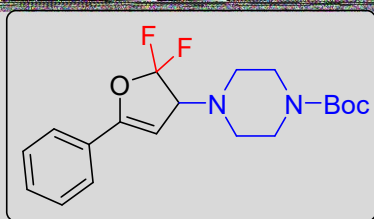

**<sup>1</sup>H spectrum (CDCl<sub>3</sub>) tert-butyl 4-(5-(3,5-dimethylphenyl)-2,2-difluoro-2,3-dihydrofuran-3-yl) piperazine-1-carboxylate (5n)**

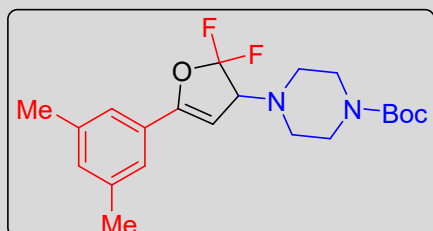

**<sup>13</sup>C spectrum (CDCl<sub>3</sub>) tert-butyl 4-(5-(3,5-dimethylphenyl)-2,2-difluoro-2,3-dihydrofuran-3-yl) piperazine-1-carboxylate (5n)**

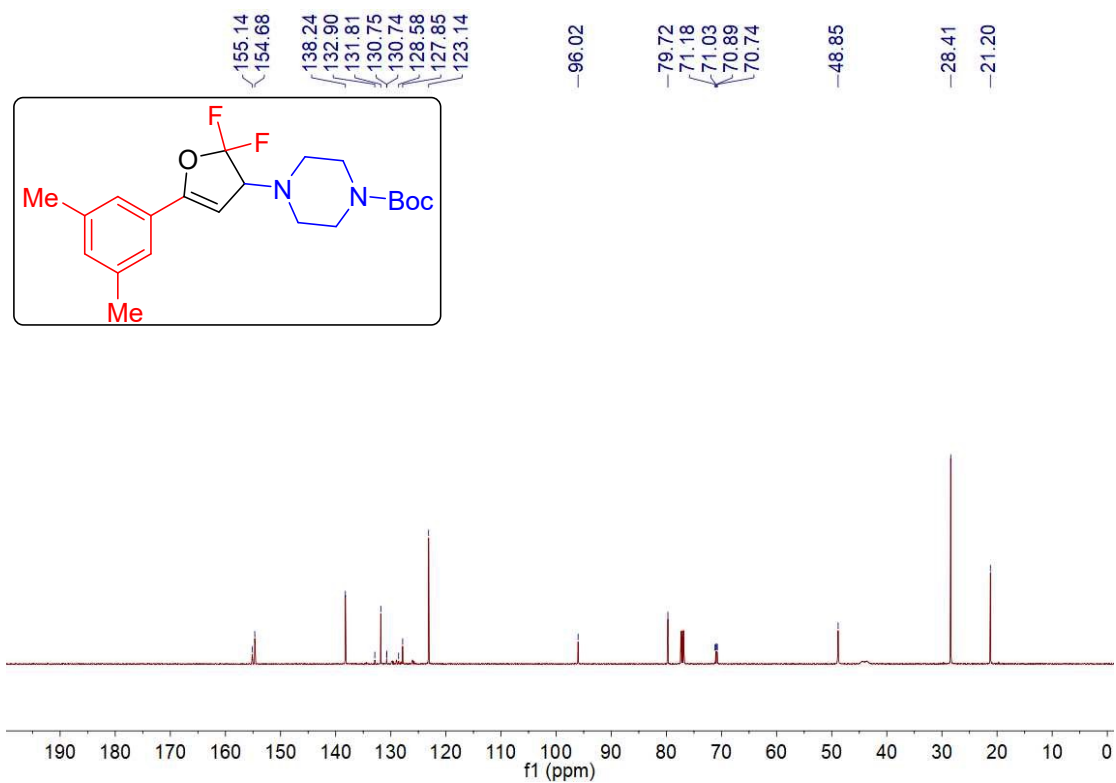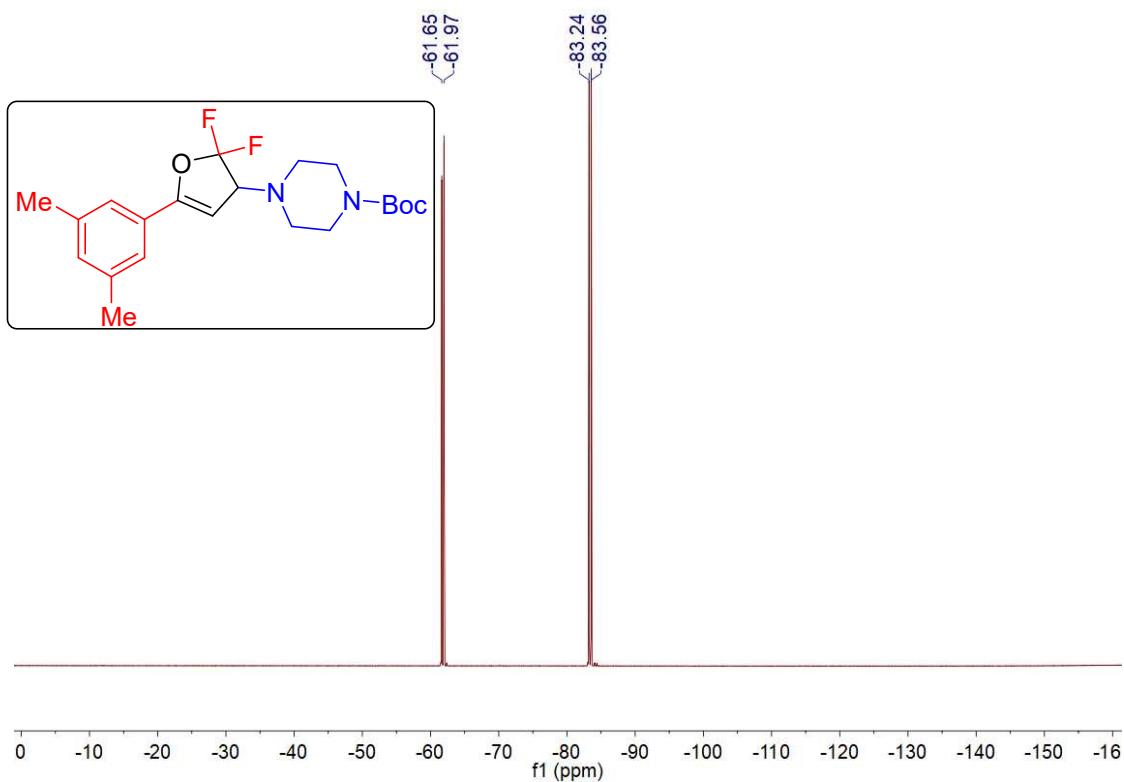

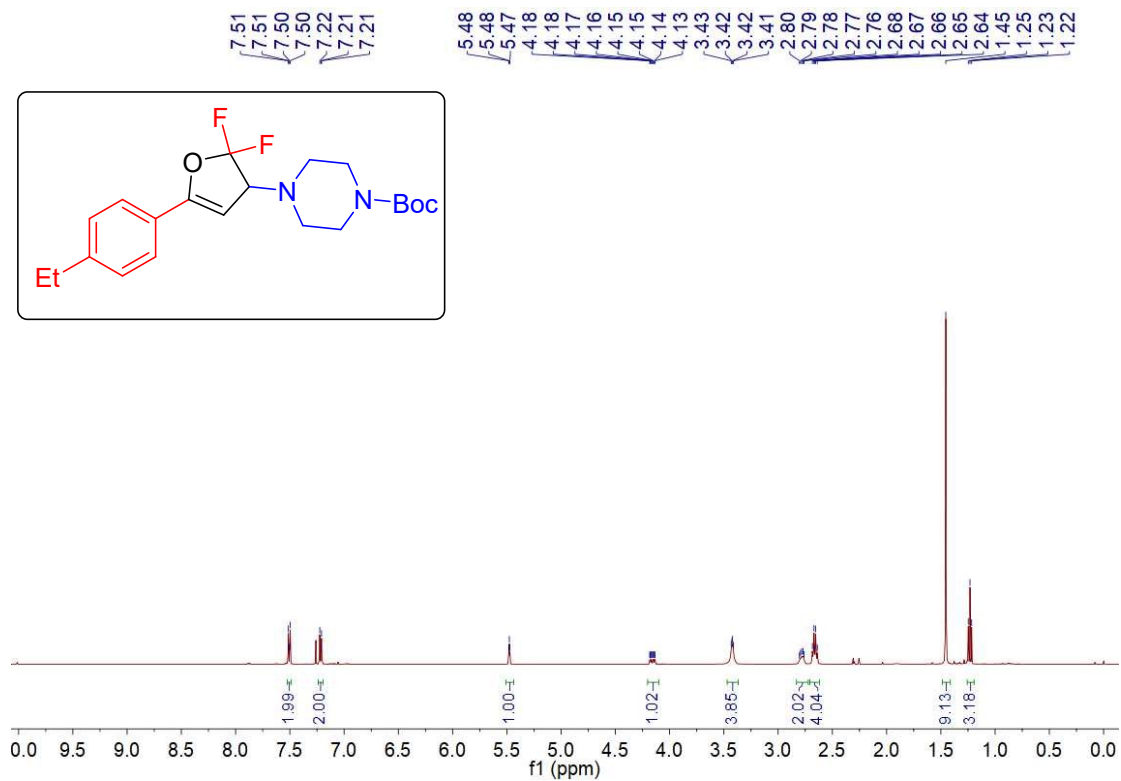

**<sup>13</sup>C spectrum (CDCl<sub>3</sub>) tert-butyl 4-(5-(4-ethylphenyl)-2,2-difluoro-2,3-dihydrofuran-3-yl)piperazine-1-carboxylate (5o)**

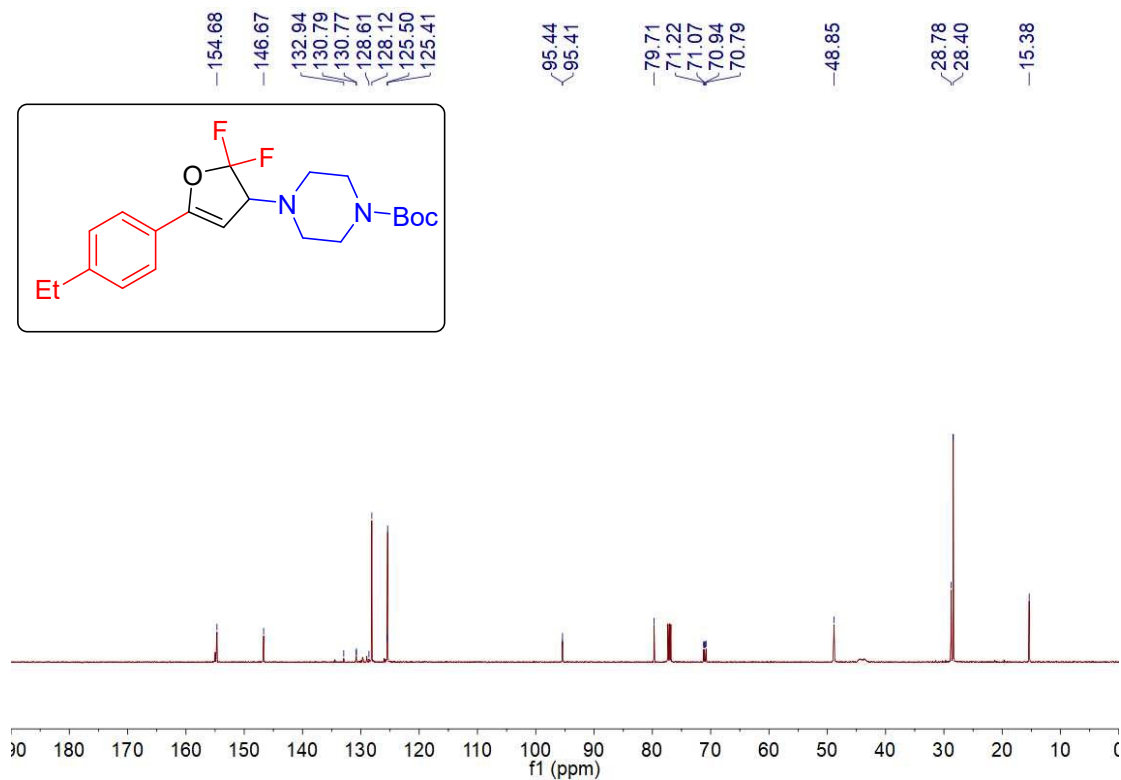

**<sup>19</sup>F spectrum (CDCl<sub>3</sub>) tert-butyl 4-(5-(4-ethylphenyl)-2,2-difluoro-2,3-dihydrofuran-3-yl)piperazine-1-carboxylate (5o)**



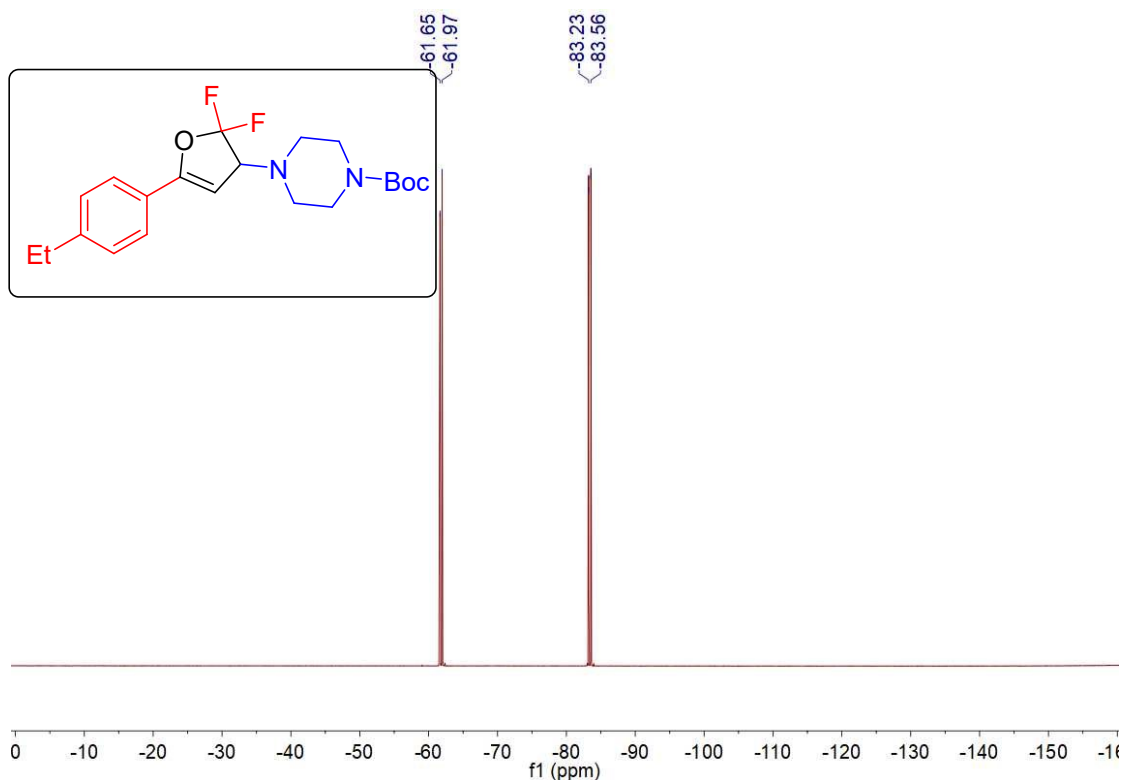

**<sup>1</sup>H spectrum (CDCl<sub>3</sub>) tert-butyl 4-(5-((1,1'-biphenyl)-4-yl)-2,2-difluoro-2,3-dihydrofuran-3-yl)piperazine-1-carboxylate (5p)**

7.68  
7.67  
7.67  
7.66  
7.64  
7.64  
7.63  
7.62  
7.62  
7.61  
7.61  
7.60  
7.60  
7.60  
7.48  
7.47  
7.47  
7.46  
7.46  
7.45  
7.44  
7.40  
7.39  
7.39  
7.38  
7.38  
7.37  
5.59  
5.58  
5.58  
4.22  
4.22  
4.21  
4.20  
4.19  
4.19  
4.18  
3.46  
3.45  
3.44  
2.82  
2.81  
2.80  
2.79  
2.72  
2.71  
2.70  
2.69  
1.47

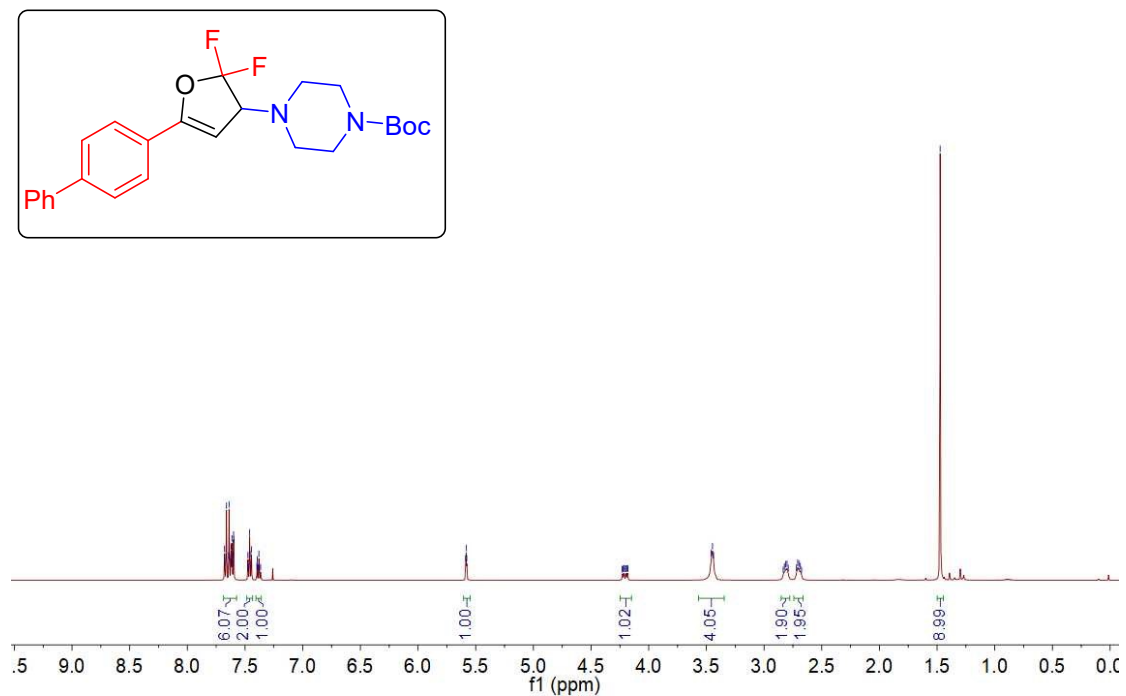

**<sup>13</sup>C spectrum (CDCl<sub>3</sub>) tert-butyl 4-(5-((1,1'-biphenyl)-4-yl)-2,2-difluoro-2,3-dihydrofuran-3-yl)piperazine-1-carboxylate (5p)**

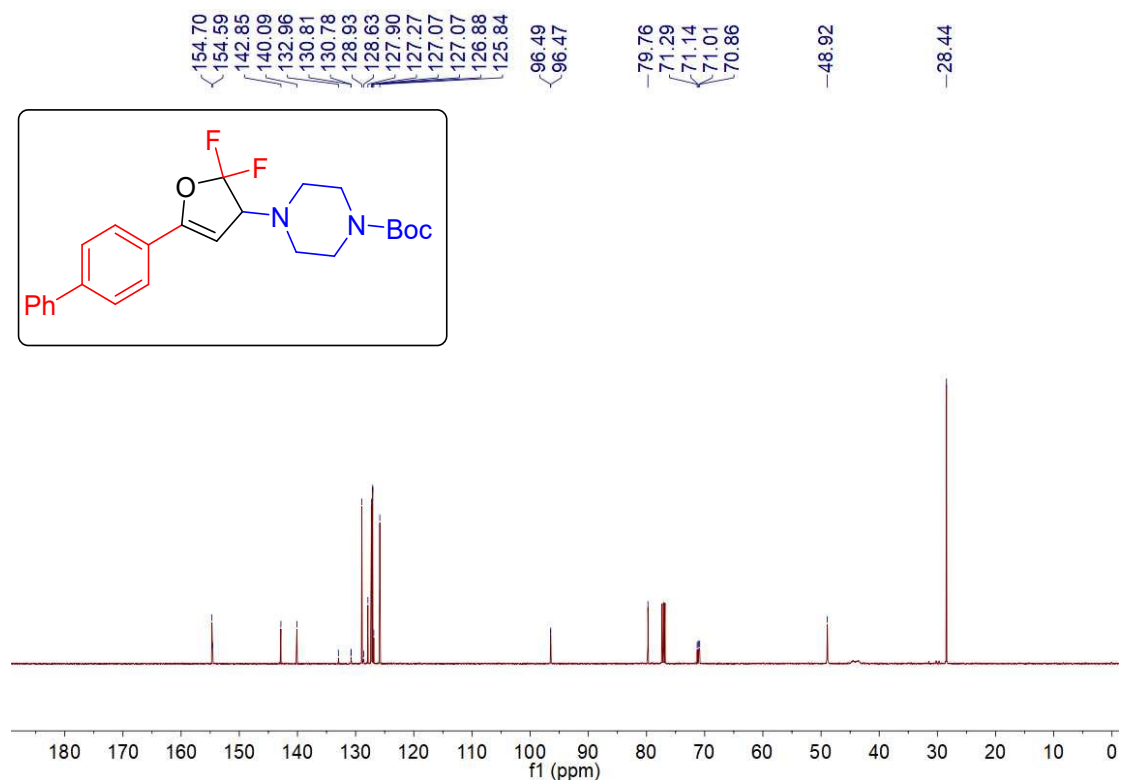

**<sup>19</sup>F spectrum (CDCl<sub>3</sub>) tert-butyl 4-(5-([1,1'-biphenyl]-4-yl)-2,2-difluoro-2,3-dihydrofuran-3-yl) piperazine-1-carboxylate (**5p**)**

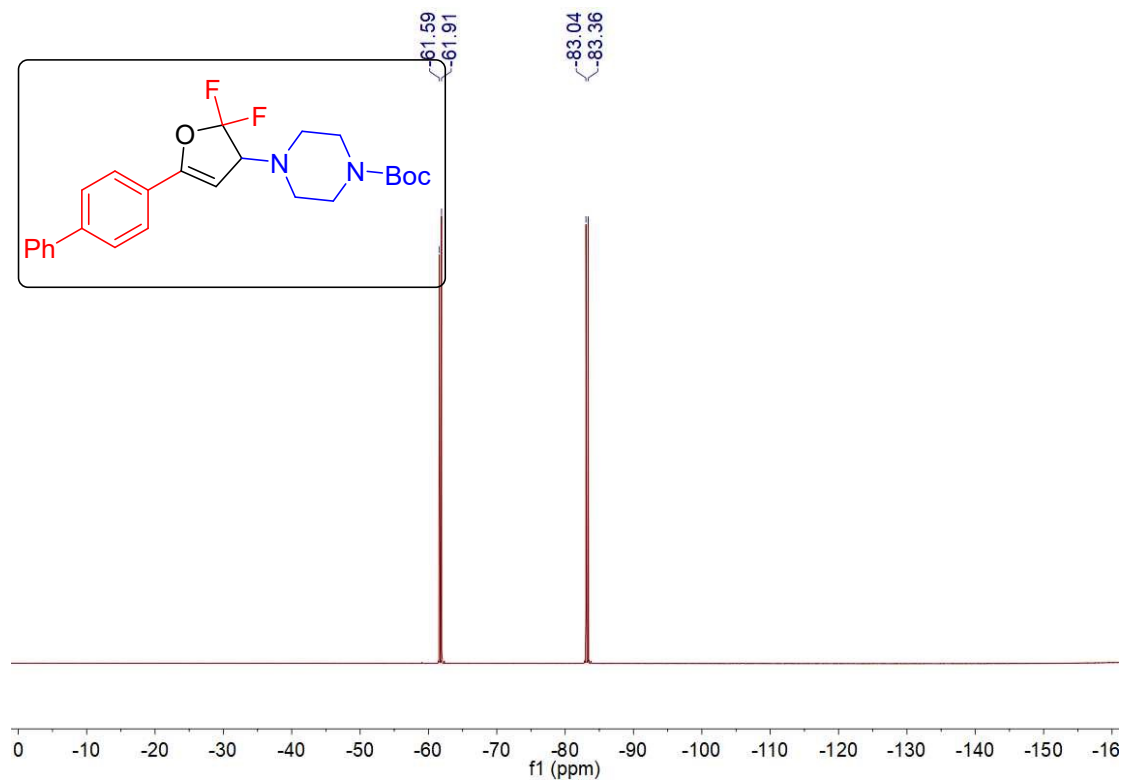

**<sup>13</sup>C spectrum (CDCl<sub>3</sub>) tert-butyl 4-(2,2-difluoro-5-(4-methoxyphenyl)-2,3-dihydrofuran-3-yl) piperazine-1-carboxylate (**5q**)**

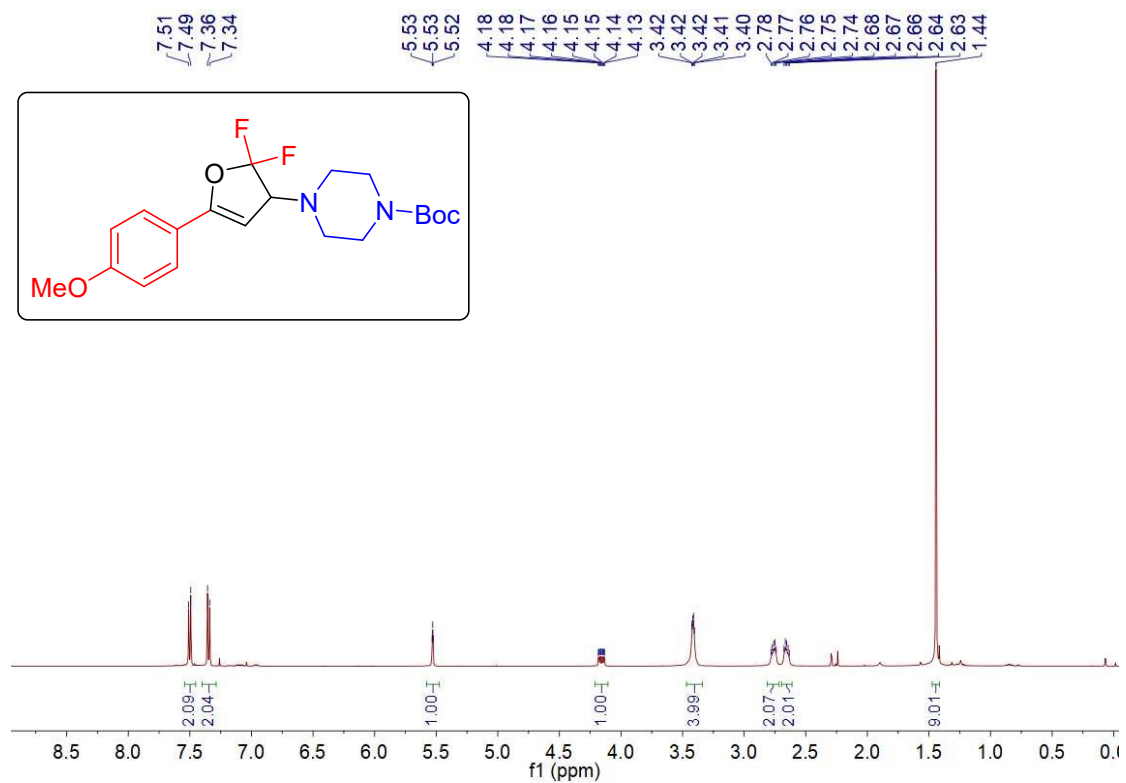

**<sup>13</sup>C spectrum (CDCl<sub>3</sub>) tert-butyl 4-(2,2-difluoro-5-(4-methoxyphenyl)-2,3-dihydrofuran-3-yl)piperazine-1-carboxylate (5q)**

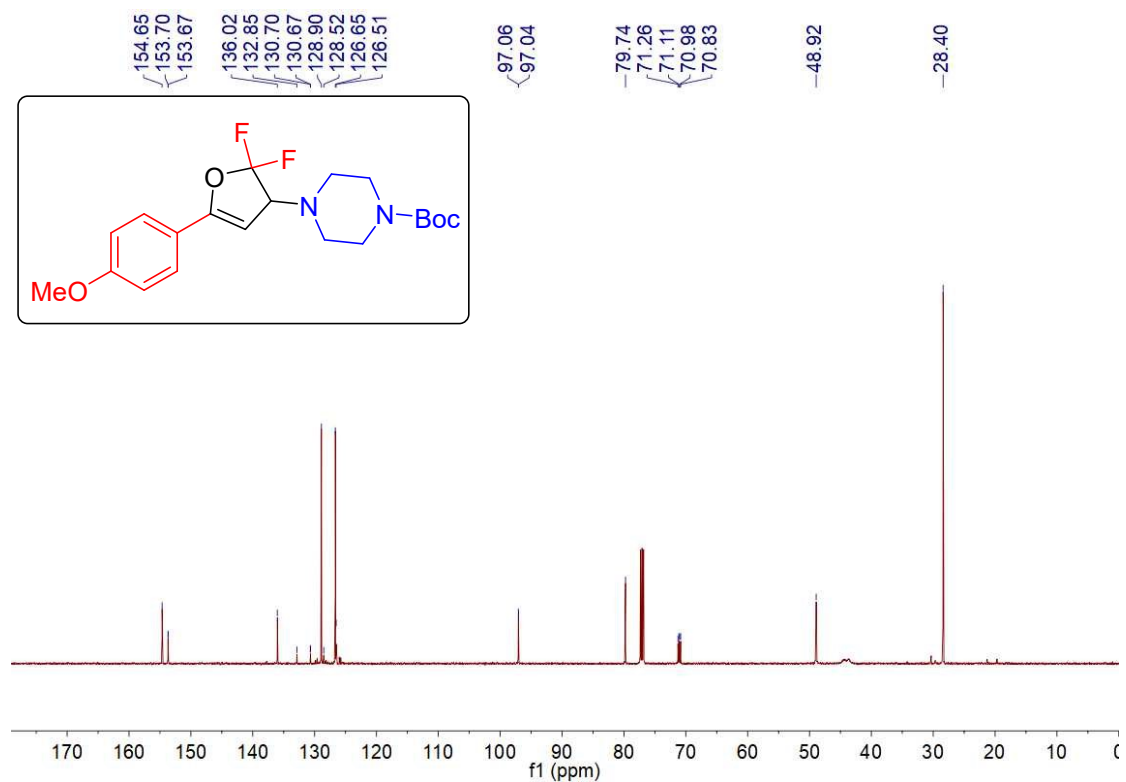

**<sup>19</sup>F spectrum (CDCl<sub>3</sub>) tert-butyl 4-(2,2-difluoro-5-(4-methoxyphenyl)-2,3-dihydrofuran-3-yl)piperazine-1-carboxylate (5q)**

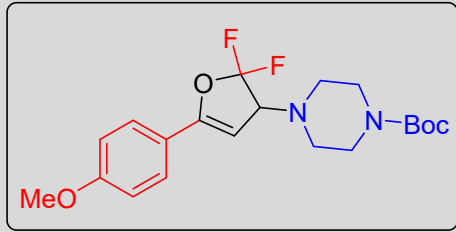

**<sup>1</sup>H spectrum (CDCl<sub>3</sub>) tert-butyl 4-(2,2-difluoro-5-(4-nitrophenyl)-2,3-dihydrofuran-3-yl)piperazine-1-carboxylate (5r)**

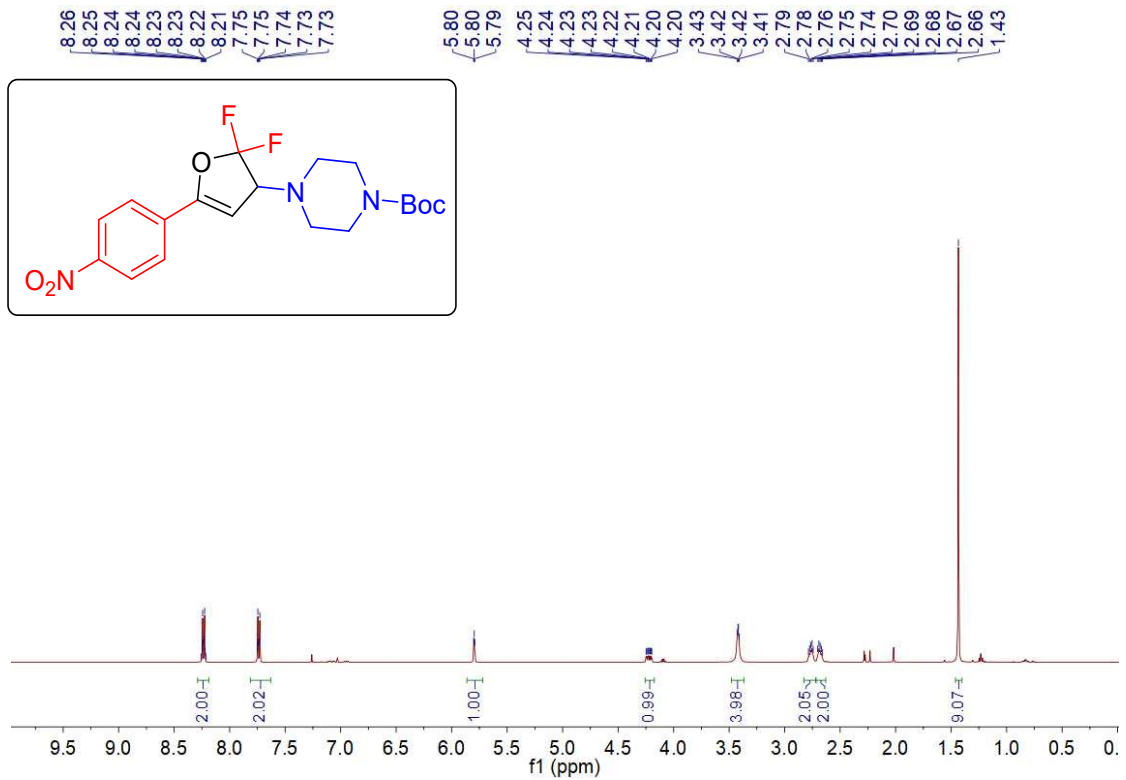

**<sup>13</sup>C spectrum (CDCl<sub>3</sub>) tert-butyl 4-(2,2-difluoro-5-(4-nitrophenyl)-2,3-dihydrofuran-3-yl)piperazine-1-carboxylate (5r)**

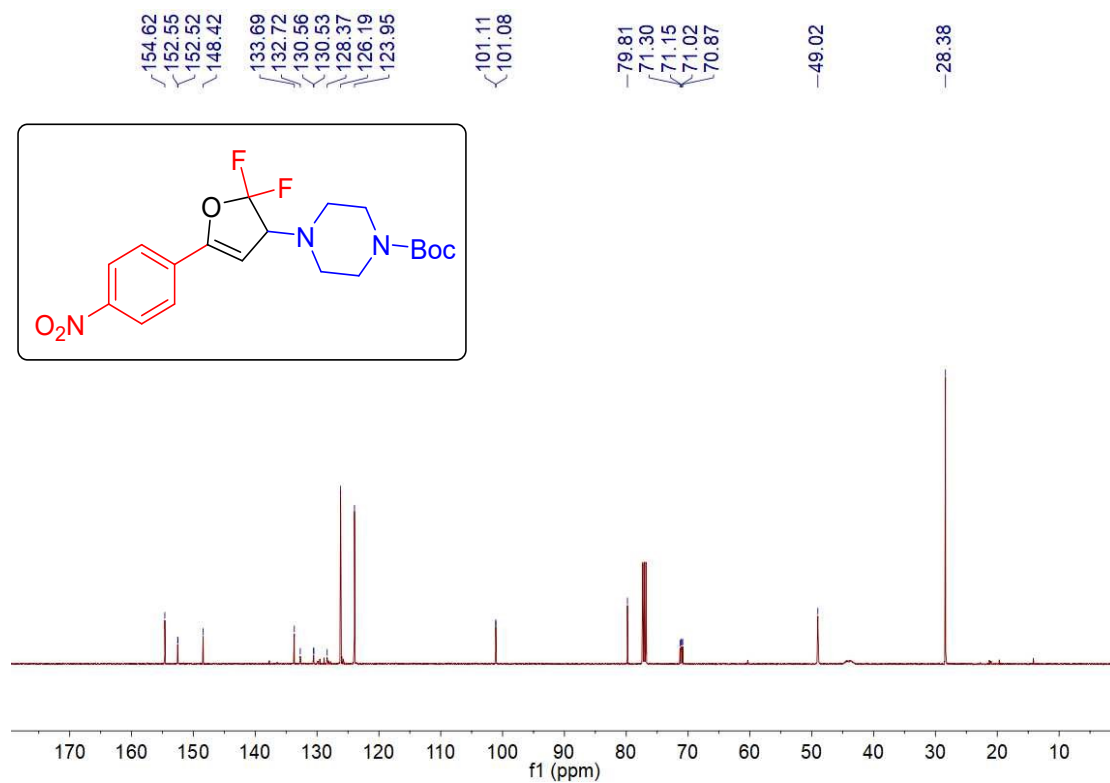

<sup>19</sup>F spectrum (CDCl<sub>3</sub>) tert-butyl 4-(2,2-difluoro-5-(4-nitrophenyl)-2,3-dihydrofuran-3-yl)piperazine-1-carboxylate (**5r**)

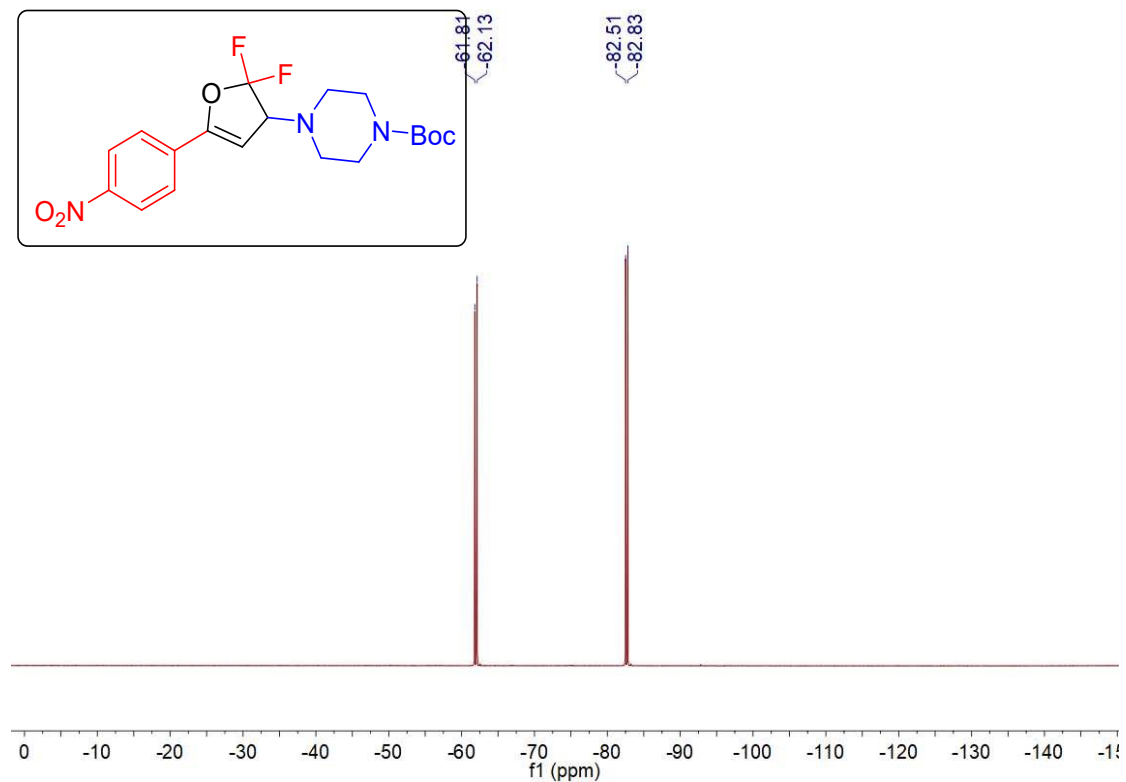

<sup>1</sup>H spectrum (CDCl<sub>3</sub>) tert-butyl 4-(5-(4-bromophenyl)-2,2-difluoro-2,3-dihydrofuran-3-yl)piperazine-1-carboxylate (**5s**)

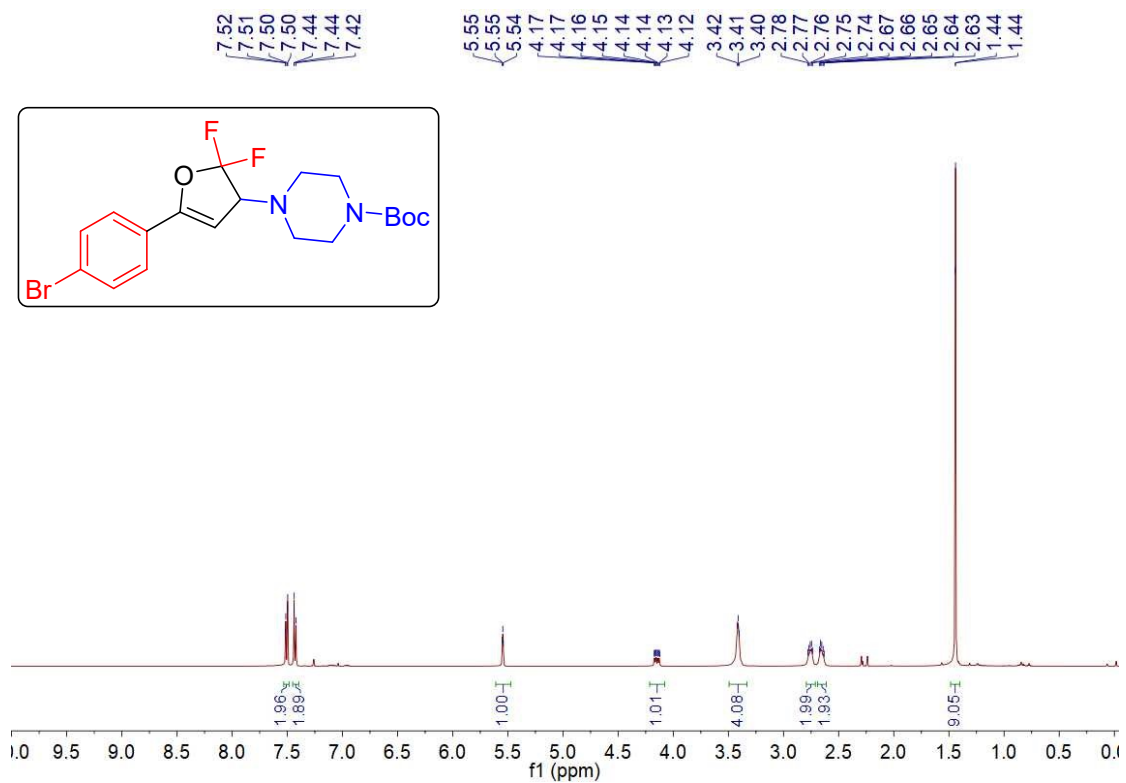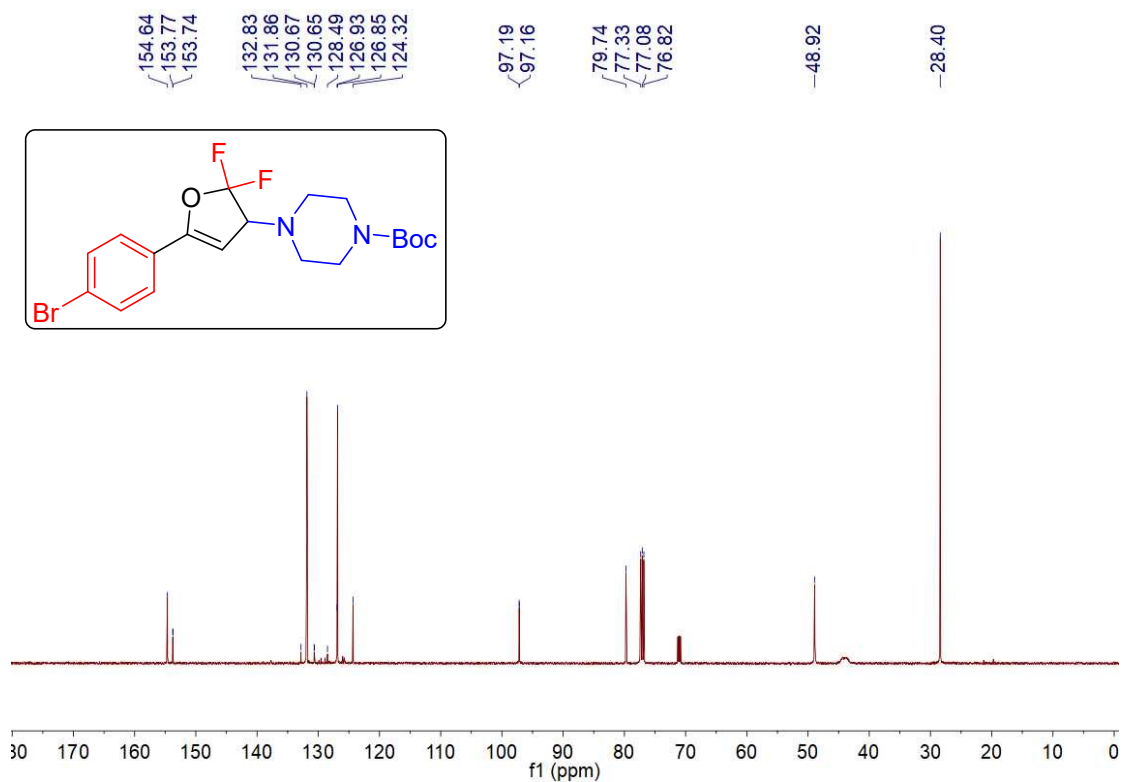

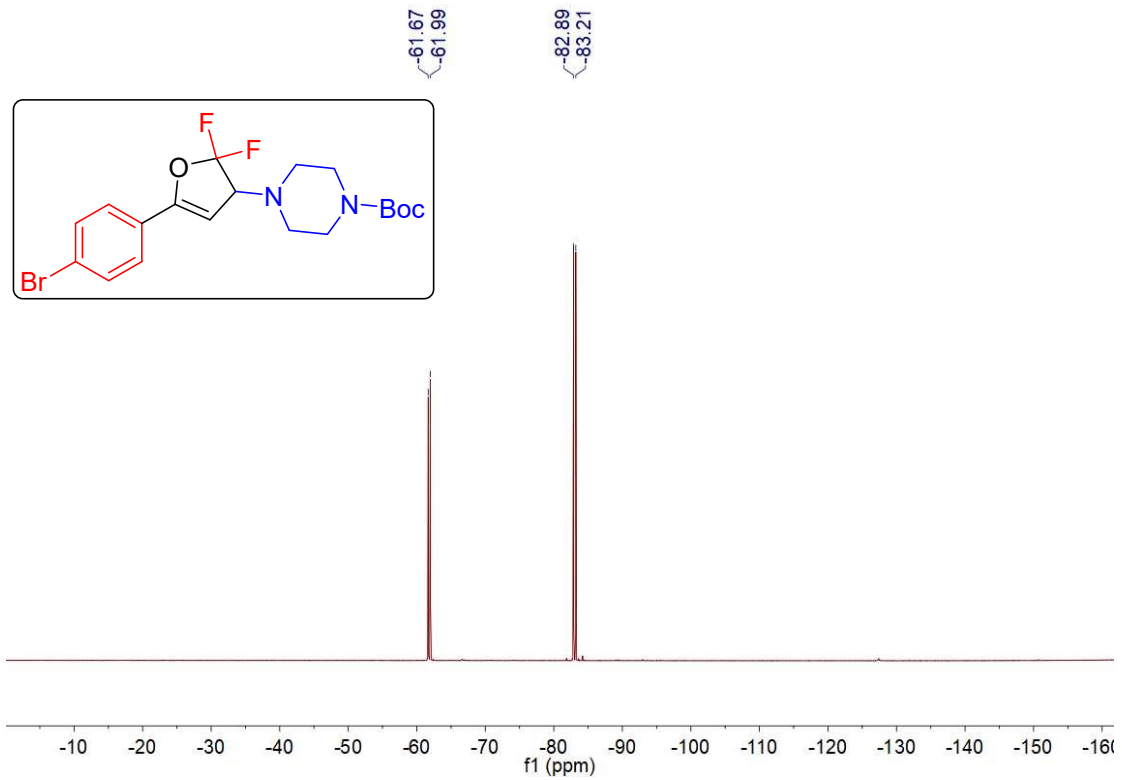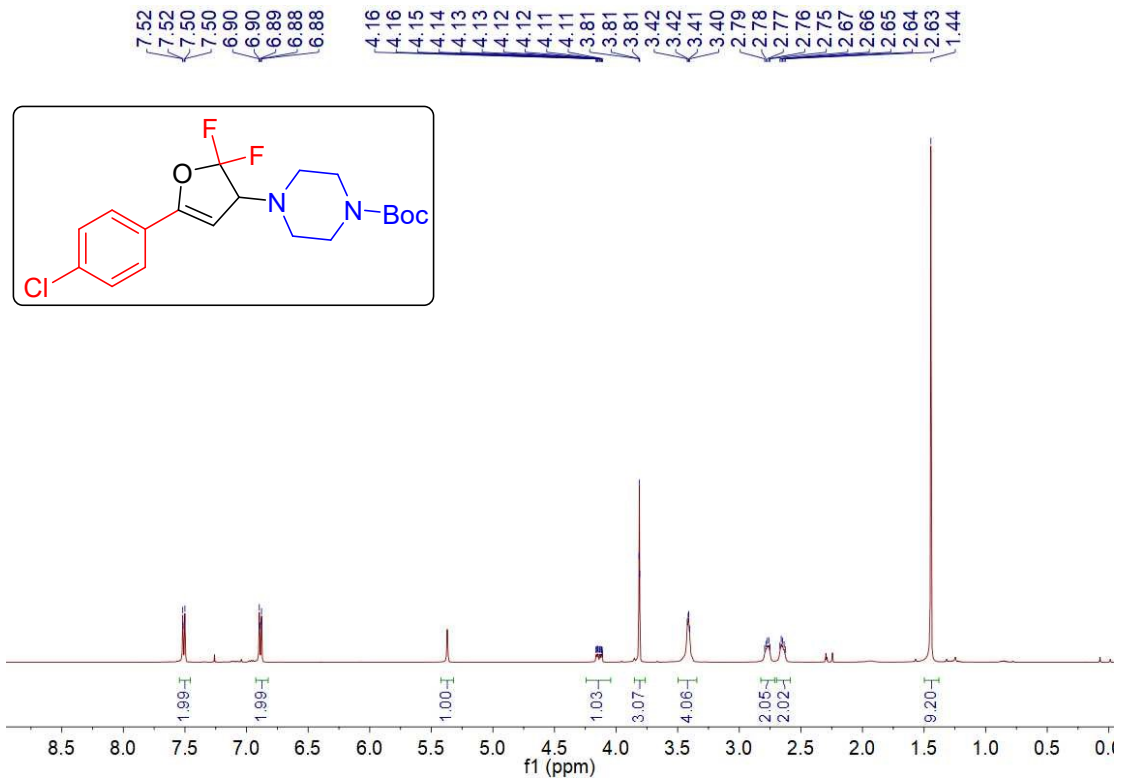

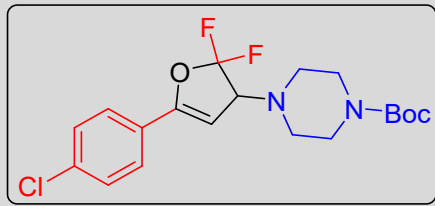

$^{19}\text{F}$  spectrum ( $\text{CDCl}_3$ ) tert-butyl 4-(5-(4-chlorophenyl)-2,2-difluoro-2,3-dihydrofuran-3-yl)piperazine-1-carboxylate (5t)

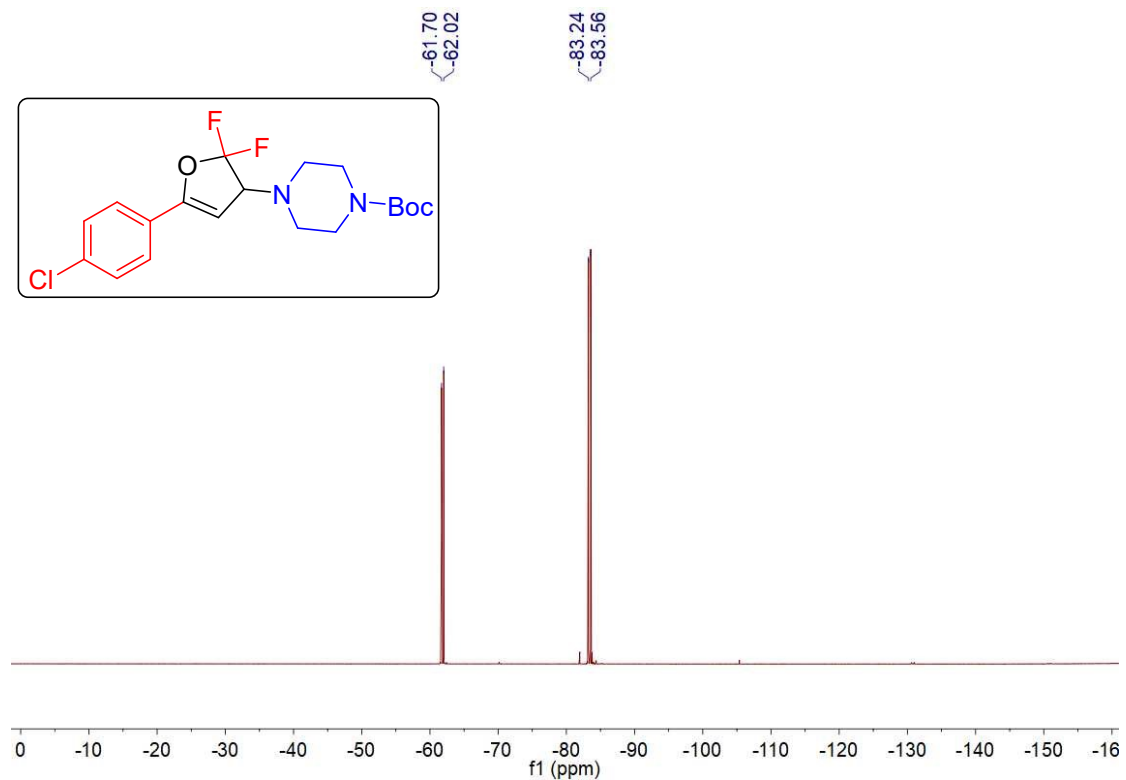

$^1\text{H}$  spectrum ( $\text{CDCl}_3$ ) tert-butyl 4-(2,2-difluoro-5-(3-(trifluoromethyl)phenyl)-2,3-dihydrofuran-3-yl)piperazine-1-carboxylate (5u)



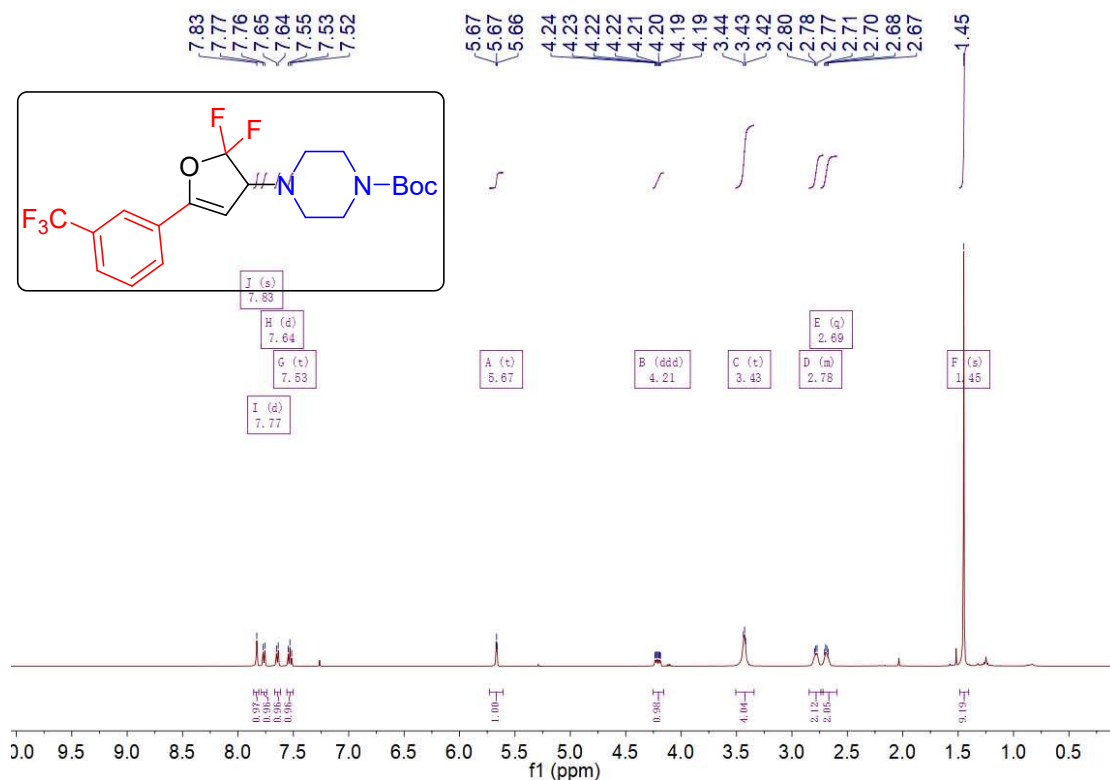

**<sup>13</sup>C spectrum (CDCl<sub>3</sub>) tert-butyl(4-(2,2-difluoro-5-(3-(trifluoromethyl)phenyl)-2,3-dihydrofuran-3-yl)piperazine-1-carboxylate (5u)**

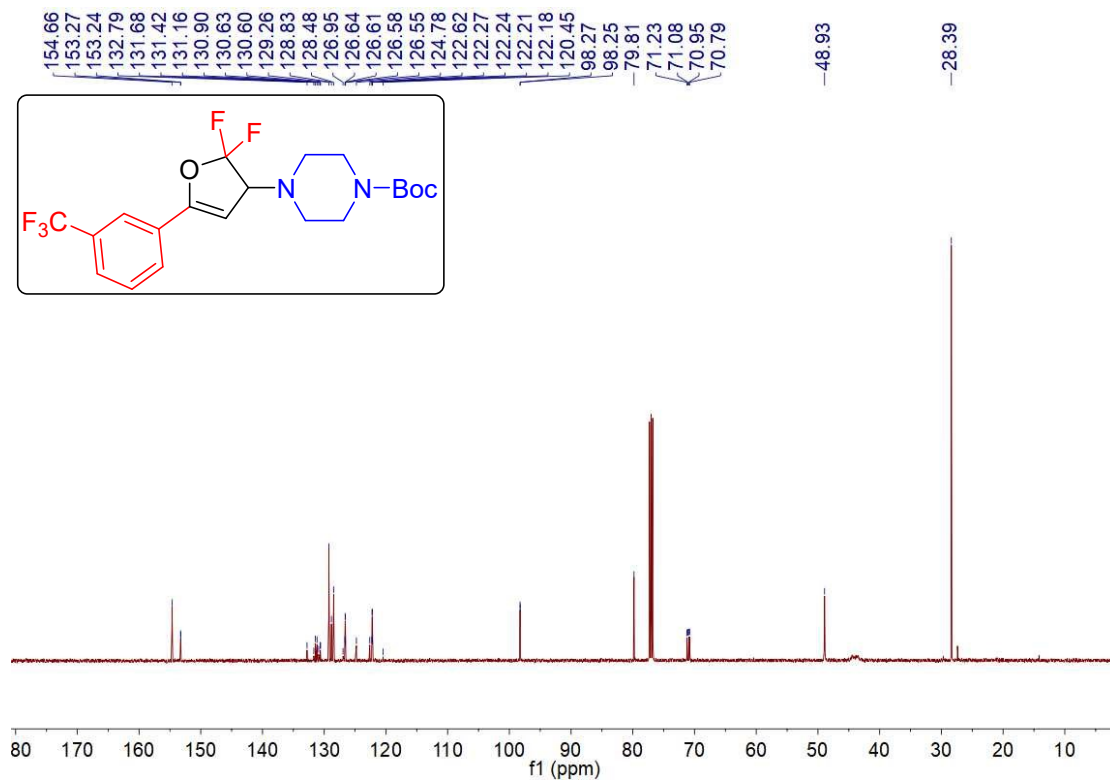

**<sup>19</sup>F spectrum (CDCl<sub>3</sub>) tert-butyl(4-(2,2-difluoro-5-(3-(trifluoromethyl)phenyl)-2,3-dihydrofuran-3-yl)piperazine-1-carboxylate (5u)**

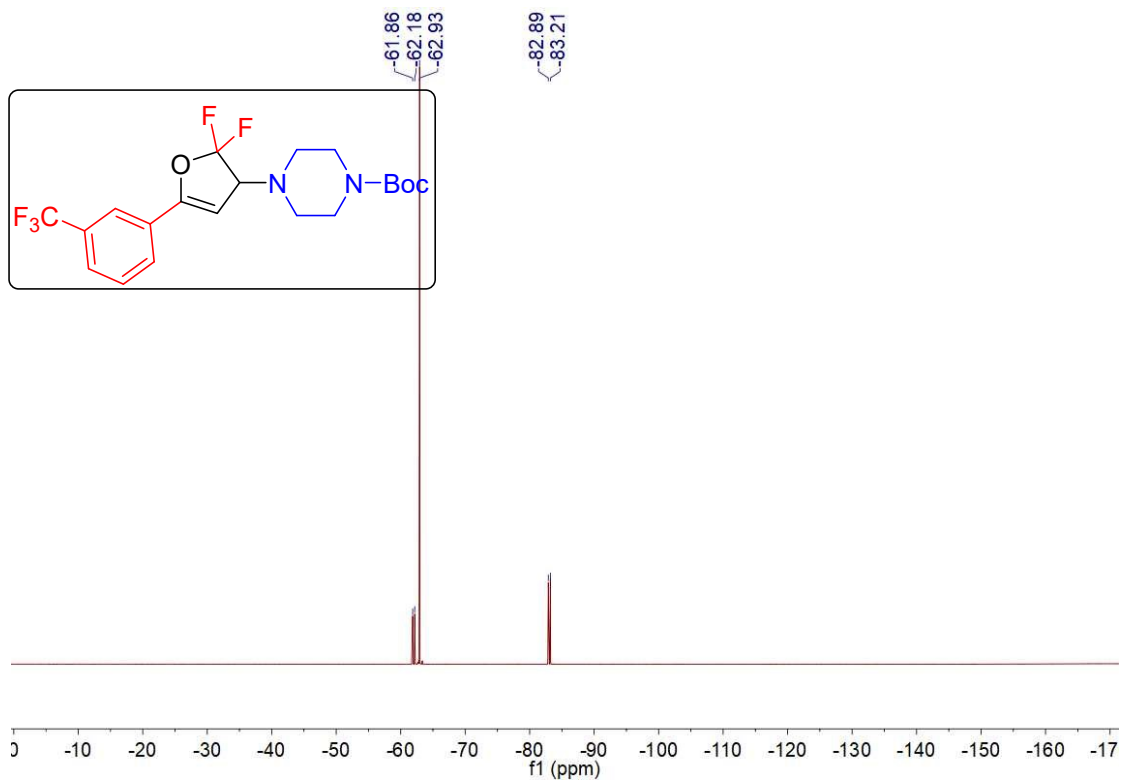

**<sup>1</sup>H spectrum (CDCl<sub>3</sub>) 1-(5-(4-bromophenyl)-2,2-difluoro-2,3-dihydrofuran-3-yl)piperidine (5v)**

7.53, 7.51, 7.46, 7.44, 5.59, 5.58, 4.15, 4.15, 4.14, 4.13, 4.12, 4.12, 4.11, 4.10, 2.80, 2.79, 2.78, 2.77, 2.76, 2.69, 2.68, 2.67, 2.66, 2.65, 1.61, 1.60, 1.59, 1.59, 1.58, 1.58, 1.57, 1.56, 1.56, 1.55, 1.55, 1.54, 1.49, 1.48, 1.47, 1.46, 1.45, 1.45

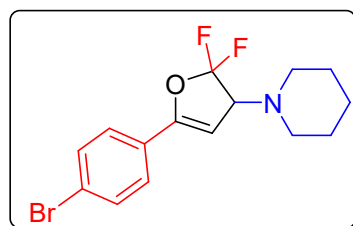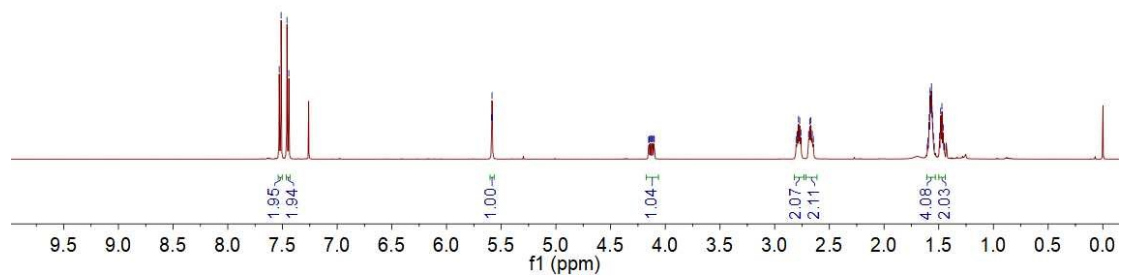

**<sup>13</sup>C spectrum (CDCl<sub>3</sub>) 1-(5-(4-bromophenyl)-2,2-difluoro-2,3-dihydrofuran-3-yl)piperidine (5v)**

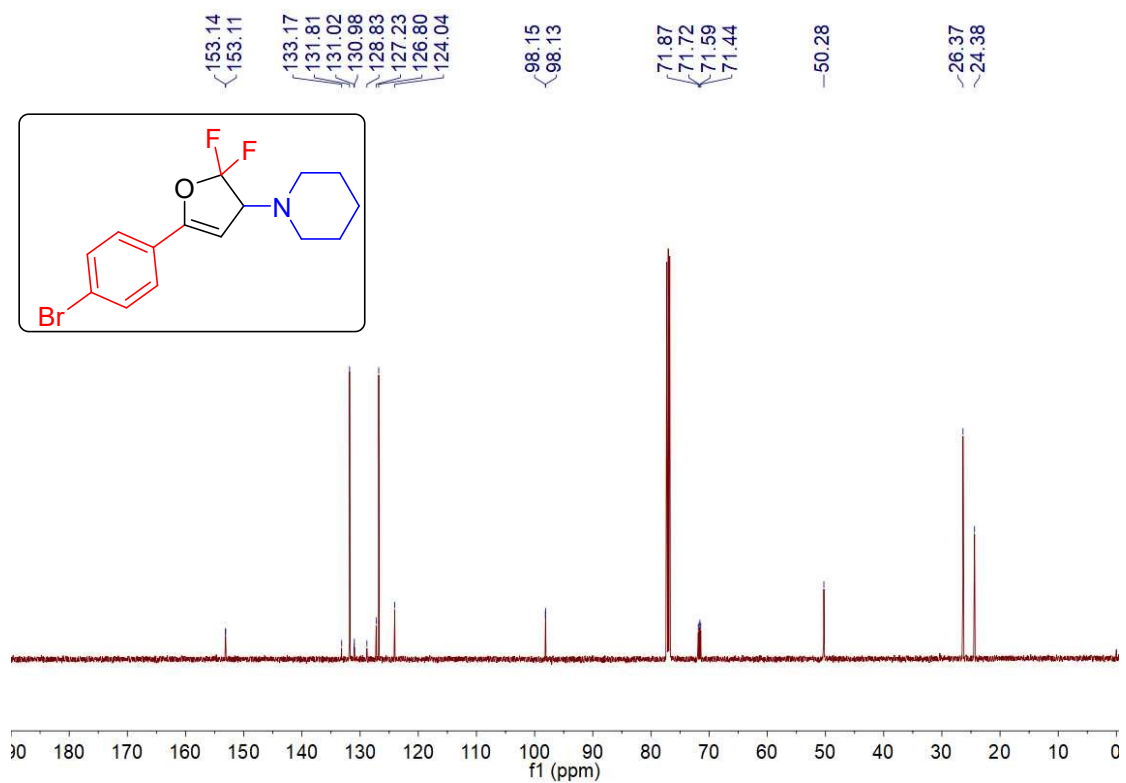

**<sup>19</sup>F spectrum (CDCl<sub>3</sub>) 1-(5-(4-bromophenyl)-2,2-difluoro-2,3-dihydrofuran-3-yl)piperidine (5v)**

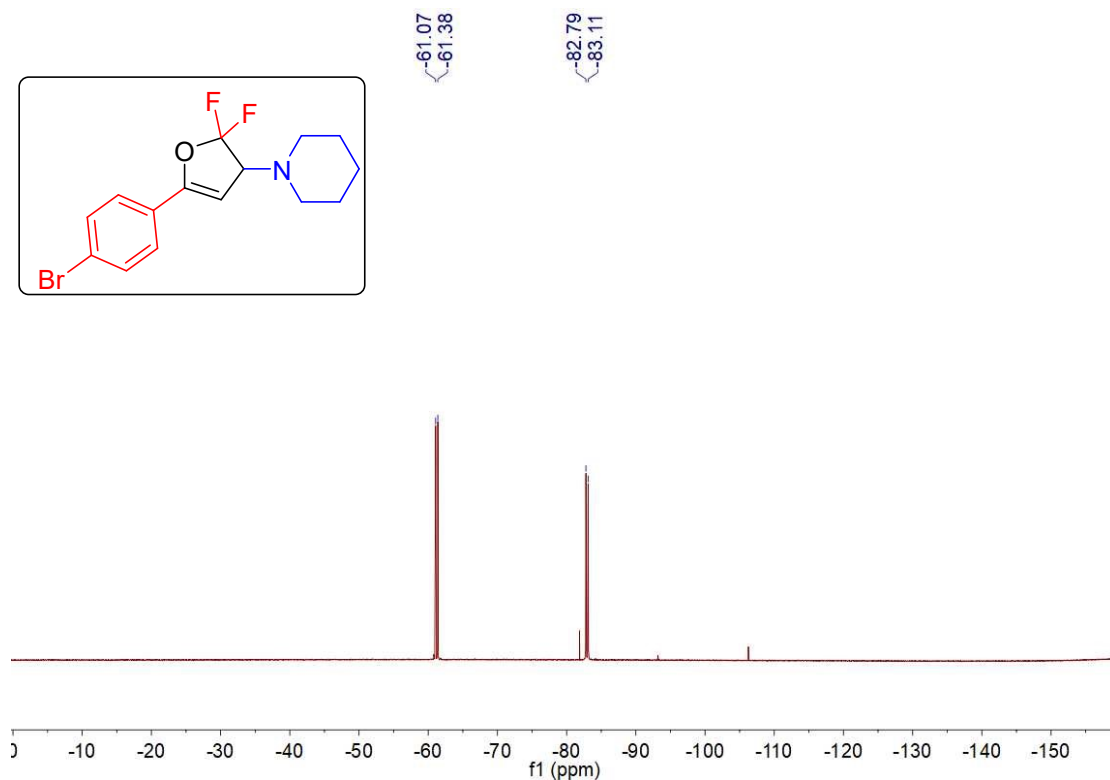

**<sup>1</sup>H spectrum (CDCl<sub>3</sub>) 1-(2,2-difluoro-5-(4-fluorophenyl)-2,3-dihydrofuran-3-yl)piperidine (5w)**

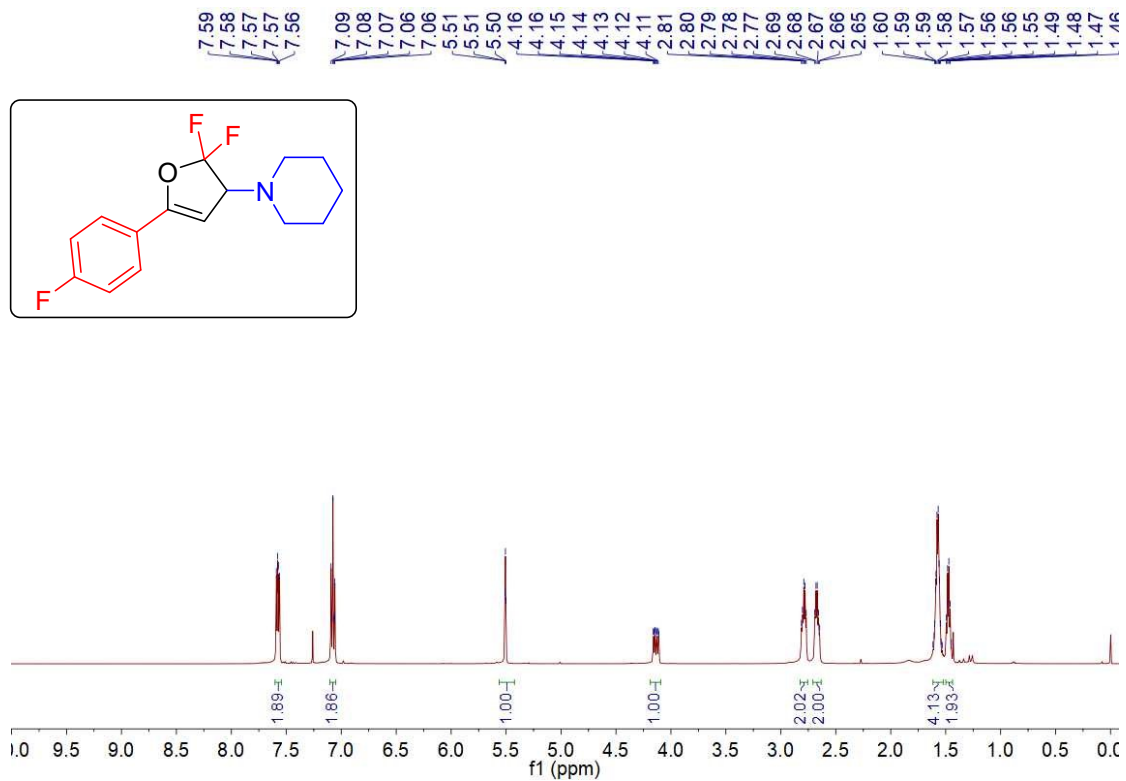

<sup>13</sup>C spectrum (CDCl<sub>3</sub>) 1-(2,2-difluoro-5-(4-fluorophenyl)-2,3-dihydrofuran-3-yl)piperidine (5w)

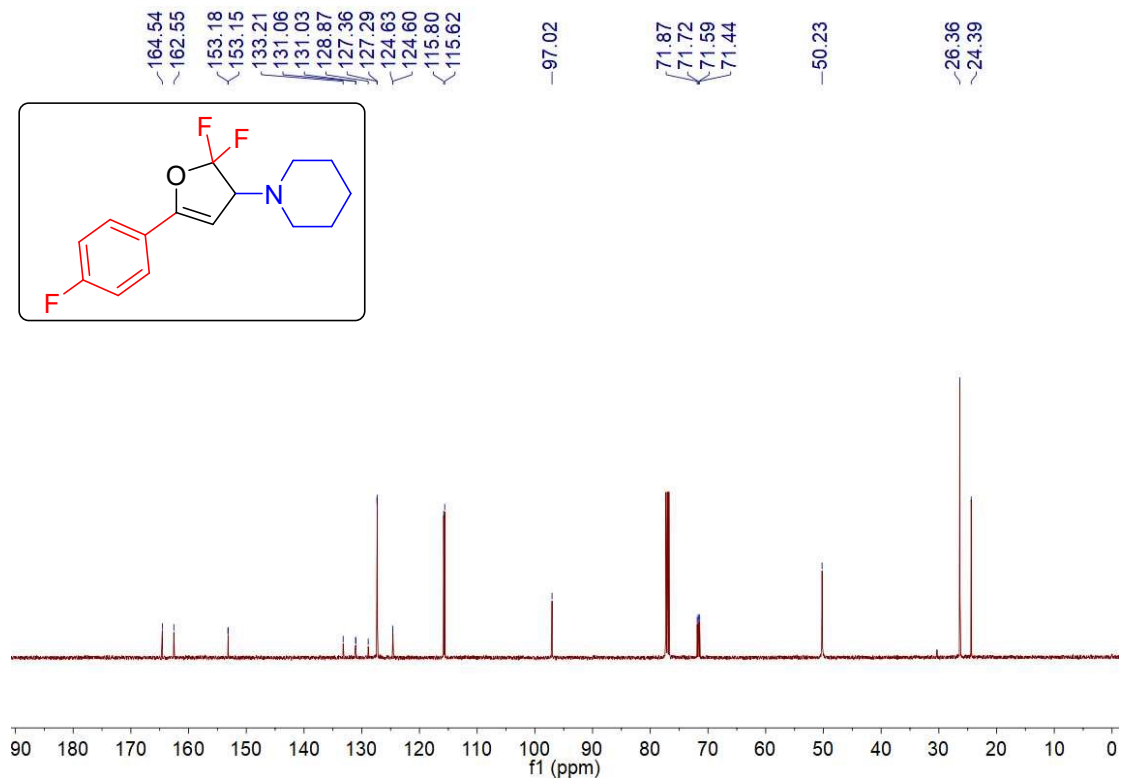

<sup>19</sup>F spectrum (CDCl<sub>3</sub>) 1-(2,2-difluoro-5-(4-fluorophenyl)-2,3-dihydrofuran-3-yl)piperidine (9w)

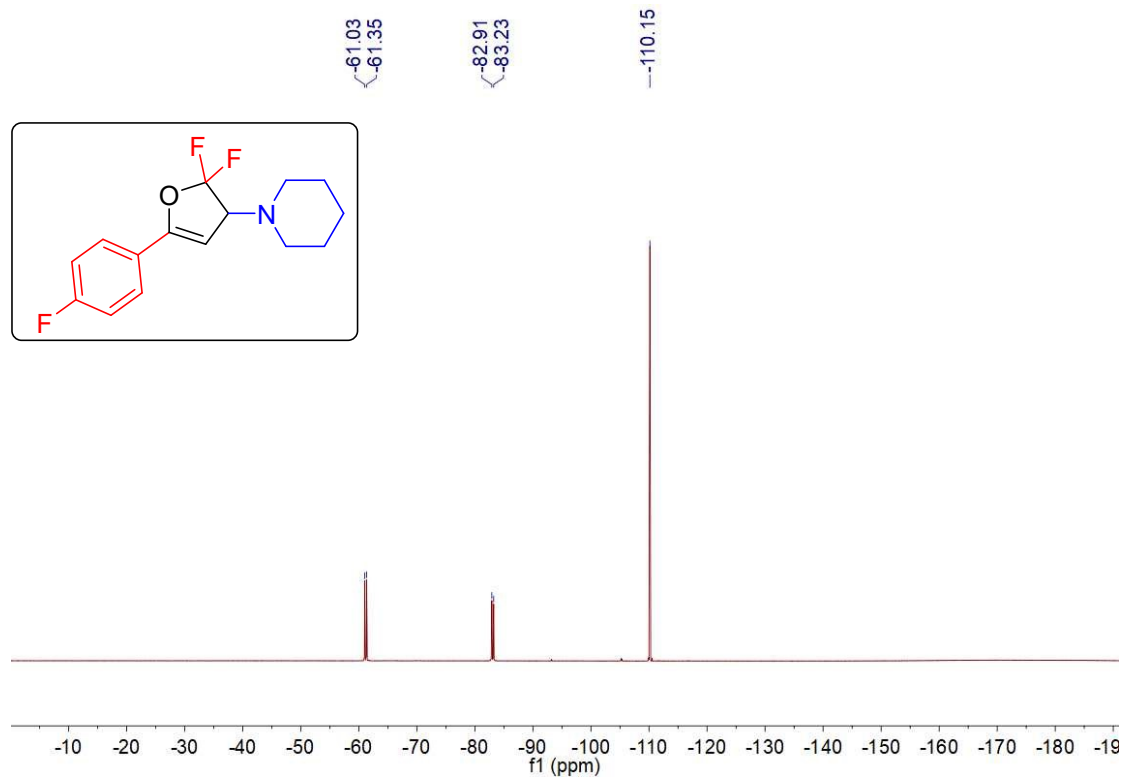

**<sup>1</sup>H spectrum (CDCl<sub>3</sub>) 1-(2,2-difluoro-5-(2-fluoro-5-methylphenyl)-2,3-dihydrofuran-3-yl)piperidine (5x)**

7.44, 7.43, 7.42, 7.42, 7.14, 7.13, 7.12, 7.11, 7.10, 7.01, 6.99, 6.98, 6.97, 5.80, 5.79, 4.19, 4.18, 4.17, 4.16, 4.15, 4.15, 4.14, 4.13, 2.82, 2.80, 2.79, 2.78, 2.77, 2.70, 2.69, 2.68, 2.66, 2.65, 2.33, 1.61, 1.60, 1.60, 1.59, 1.58, 1.58, 1.57, 1.57, 1.56, 1.56, 1.49, 1.48, 1.47, 1.46, 1.45

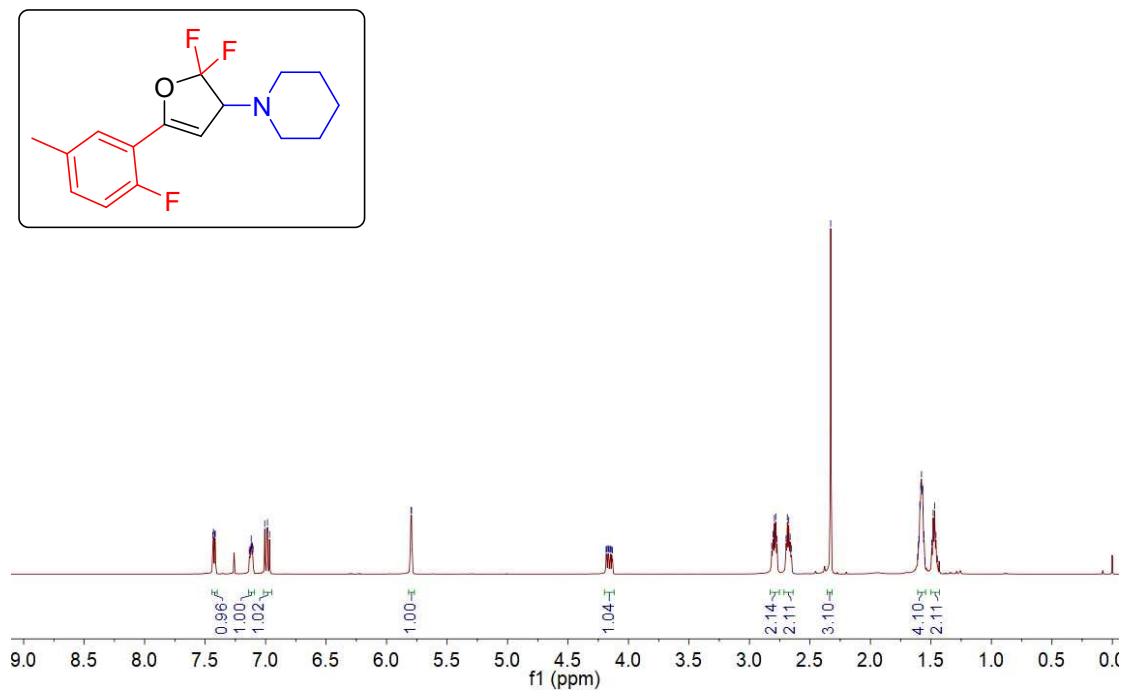

**<sup>13</sup>C spectrum (CDCl<sub>3</sub>) 1-(2,2-difluoro-5-(2-fluoro-5-methylphenyl)-2,3-dihydrofuran-3-yl)piperidine (5x)**

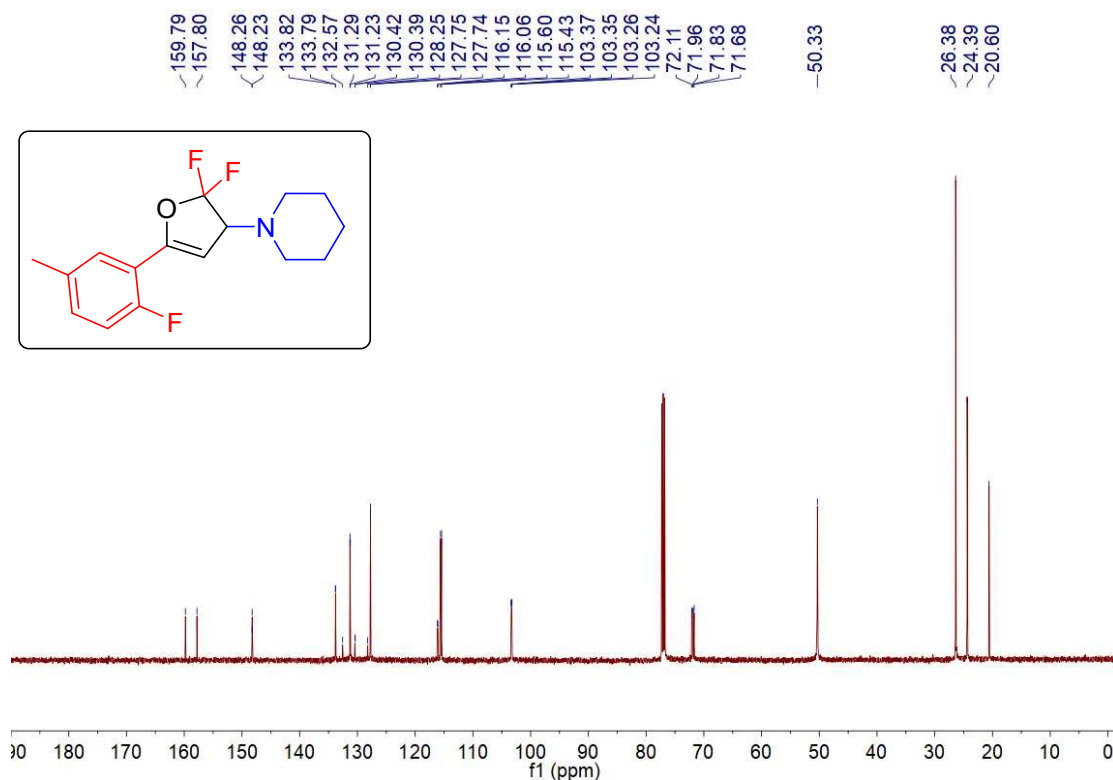

<sup>19</sup>F spectrum (CDCl<sub>3</sub>) 1-(2,2-difluoro-5-(2-fluoro-5-methylphenyl)-2,3-dihydrofuran-3-yl)piperidine (5x)

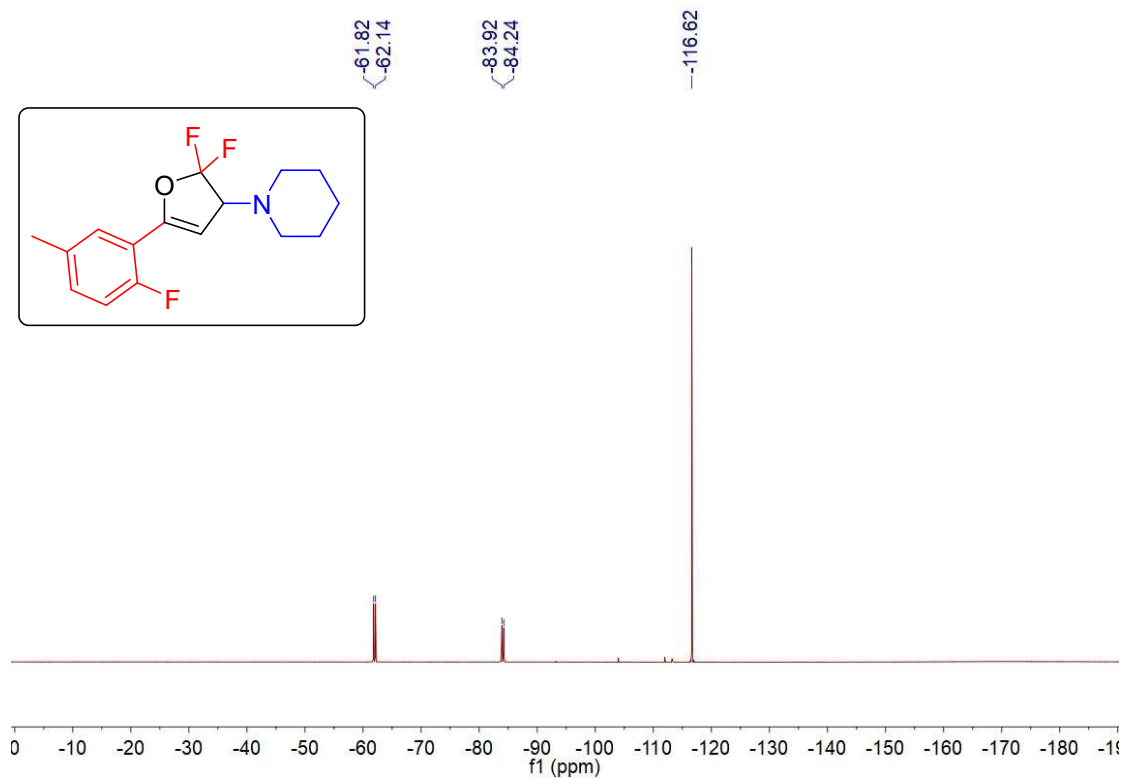

<sup>1</sup>H spectrum (CDCl<sub>3</sub>) N,N-dibenzyl-2,2-difluoro-5-phenyl-2,3-dihydrofuran-3-amine (5y)

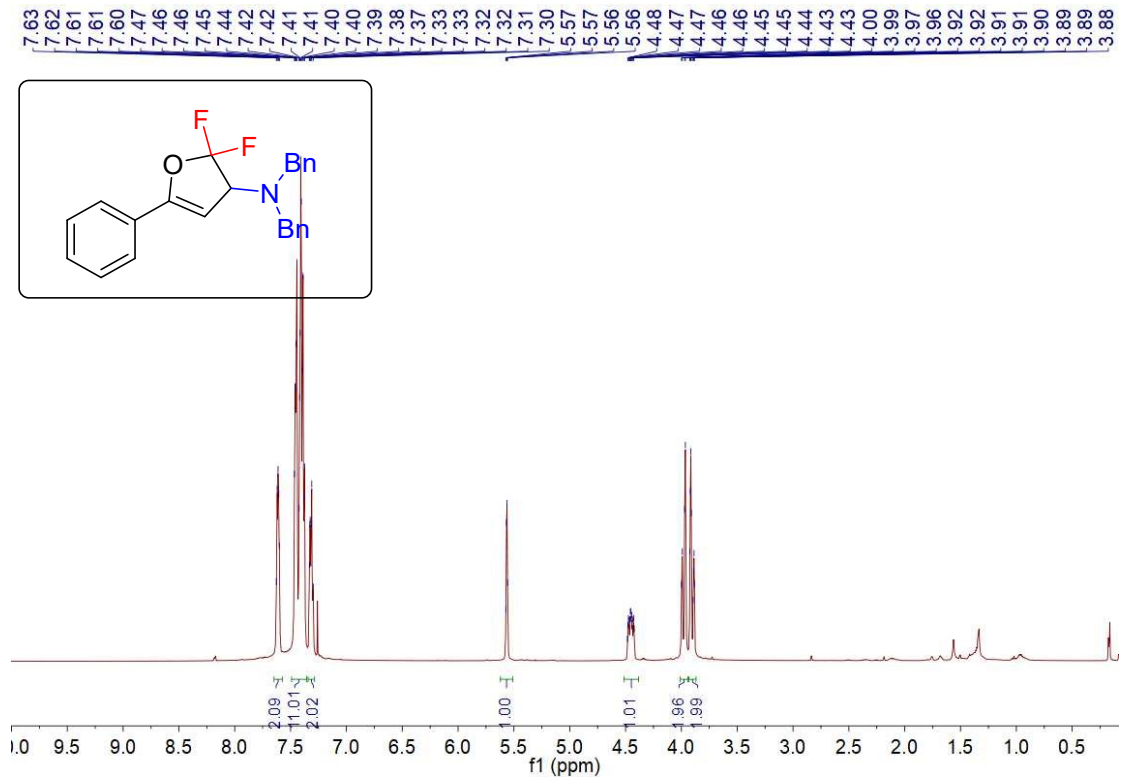

**<sup>13</sup>C spectrum (CDCl<sub>3</sub>) N,N-dibenzyl-2,2-difluoro-5-phenyl-2,3-dihydrofuran-3-amine (5y)**

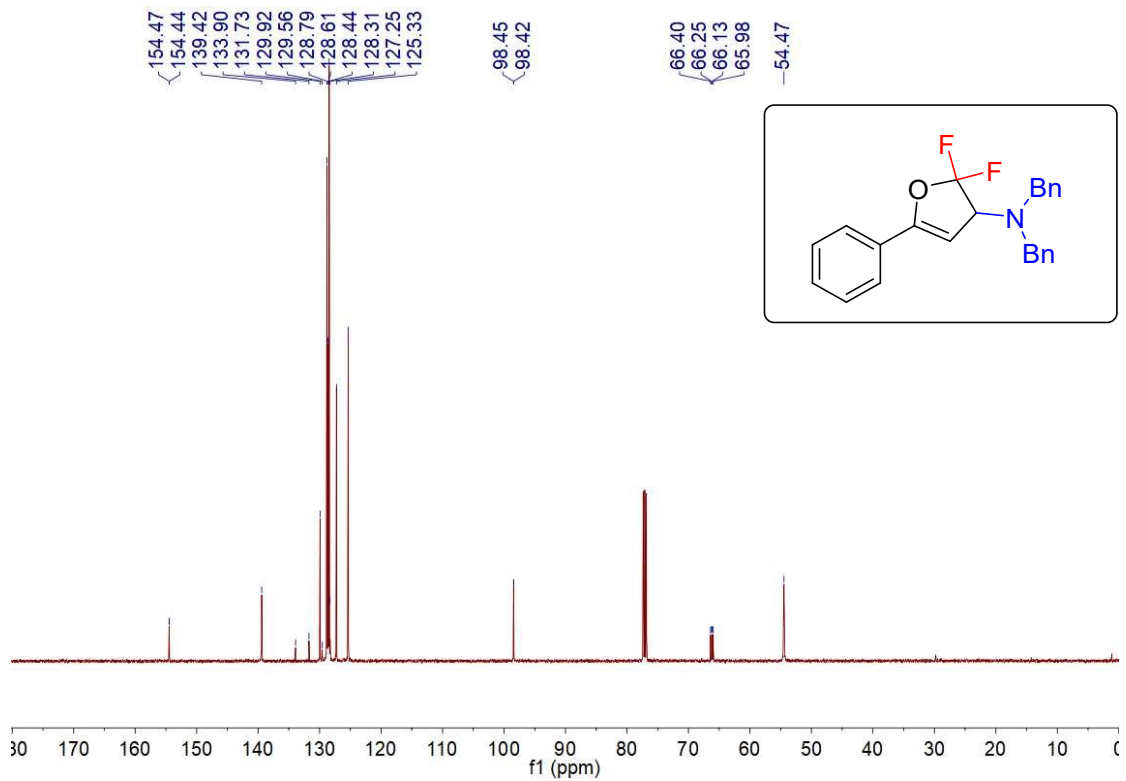

**<sup>19</sup>F spectrum (CDCl<sub>3</sub>) N,N-dibenzyl-2,2-difluoro-5-phenyl-2,3-dihydrofuran-3-amine (5y)**

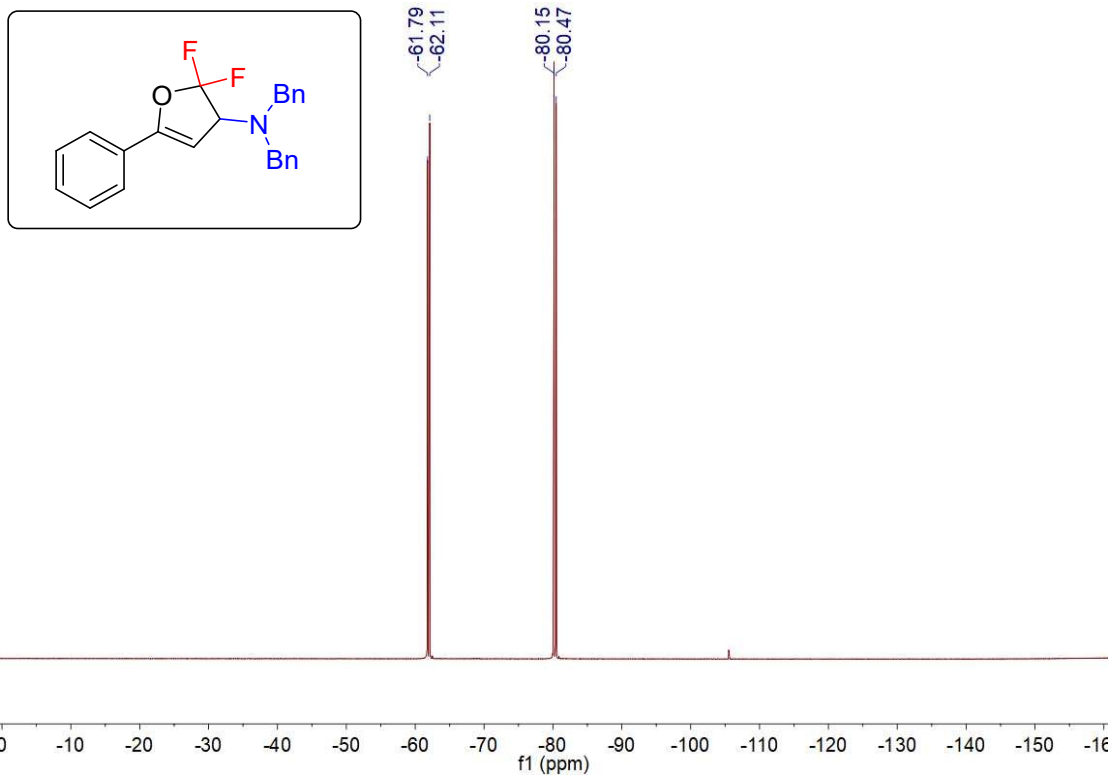

<sup>1</sup>H spectrum (CDCl<sub>3</sub>) N-benzyl-2,2-difluoro-N-methyl-5-phenyl-2,3-dihydrofuran-3-amine (**5z**)

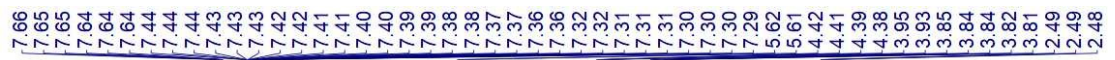

<sup>13</sup>C spectrum (CDCl<sub>3</sub>) N-benzyl-2,2-difluoro-N-methyl-5-phenyl-2,3-dihydrofuran-3-amine (**5z**)



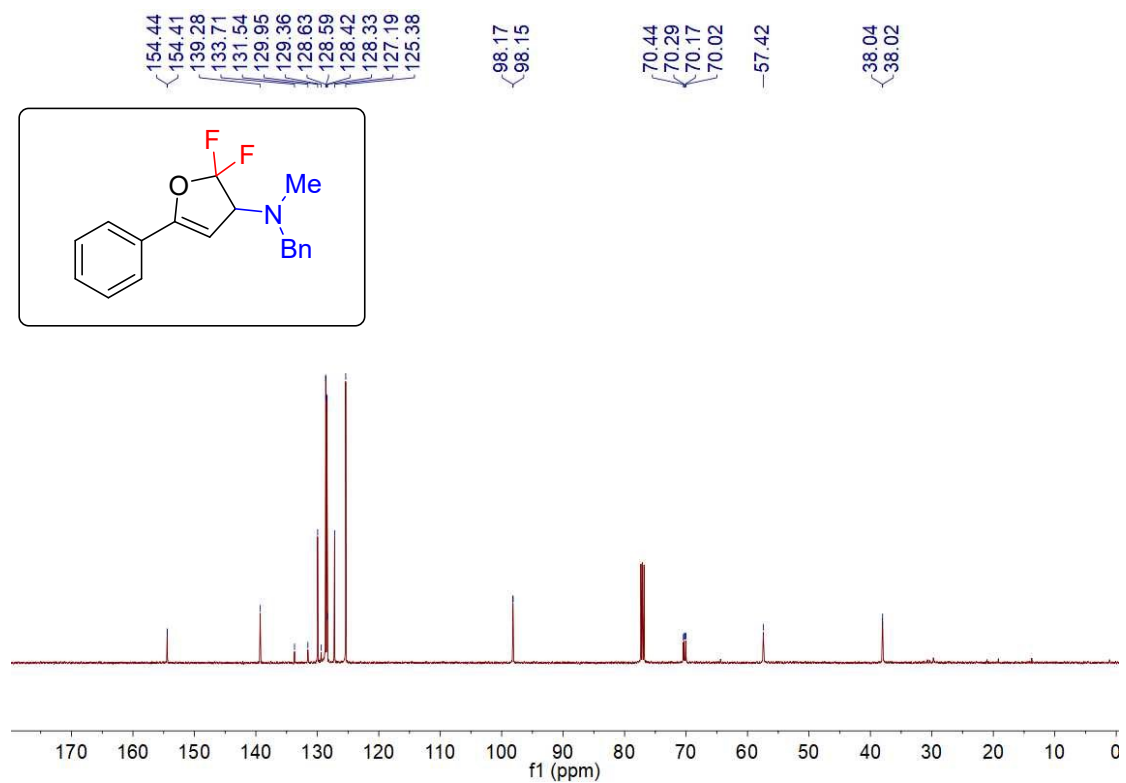

<sup>19</sup>F spectrum (CDCl<sub>3</sub>) N-benzyl-2,2-difluoro-N-methyl-5-phenyl-2,3-dihydrofuran-3-amine (5z)

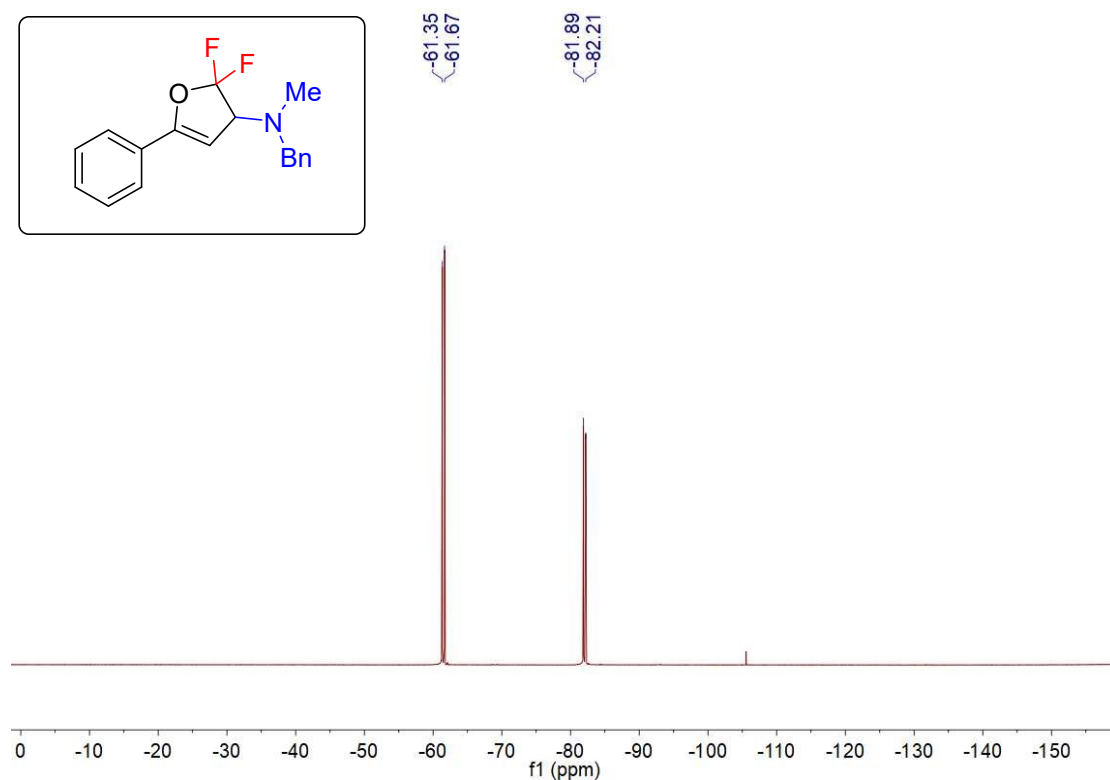

<sup>1</sup>H spectrum (CDCl<sub>3</sub>) 5-([1,1'-biphenyl]-4-yl)-N,N-diallyl-2,2-difluoro-2,3-dihydrofuran-3-amine (5aa)

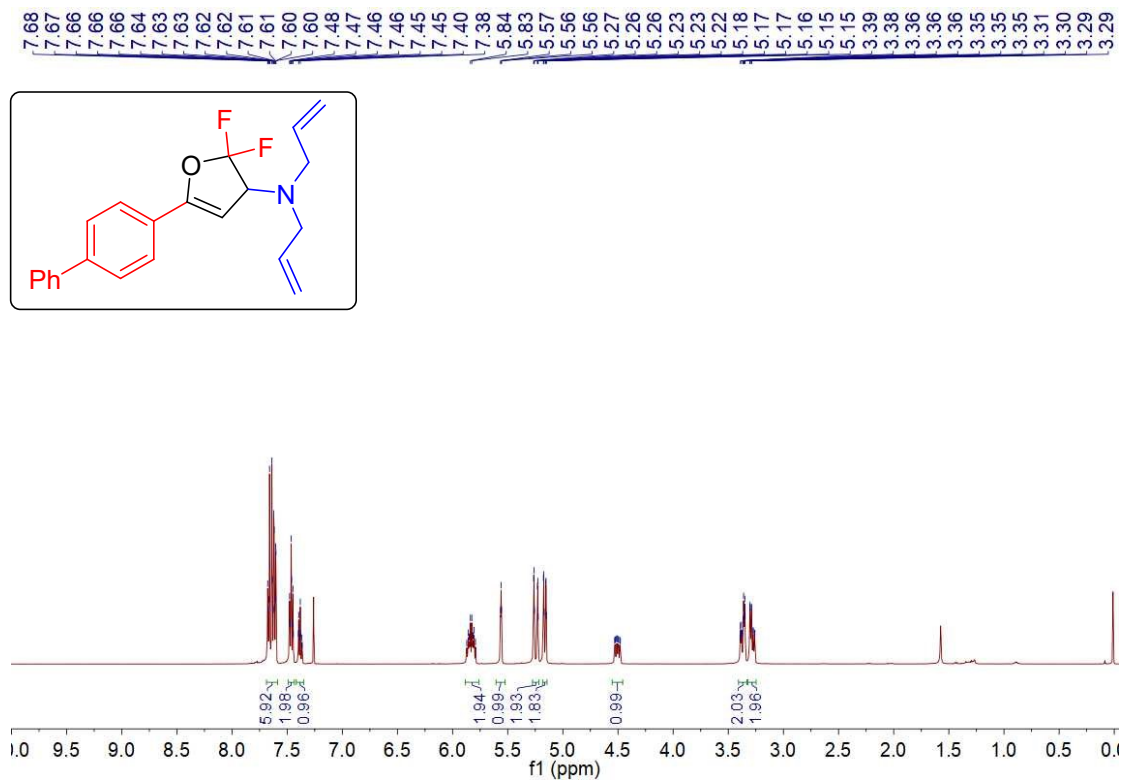

**<sup>13</sup>C spectrum (CDCl<sub>3</sub>) 5-([1,1'-biphenyl]-4-yl)-N,N-diallyl-2,2-difluoro-2,3-dihydrofuran-3-amine (5aa)**

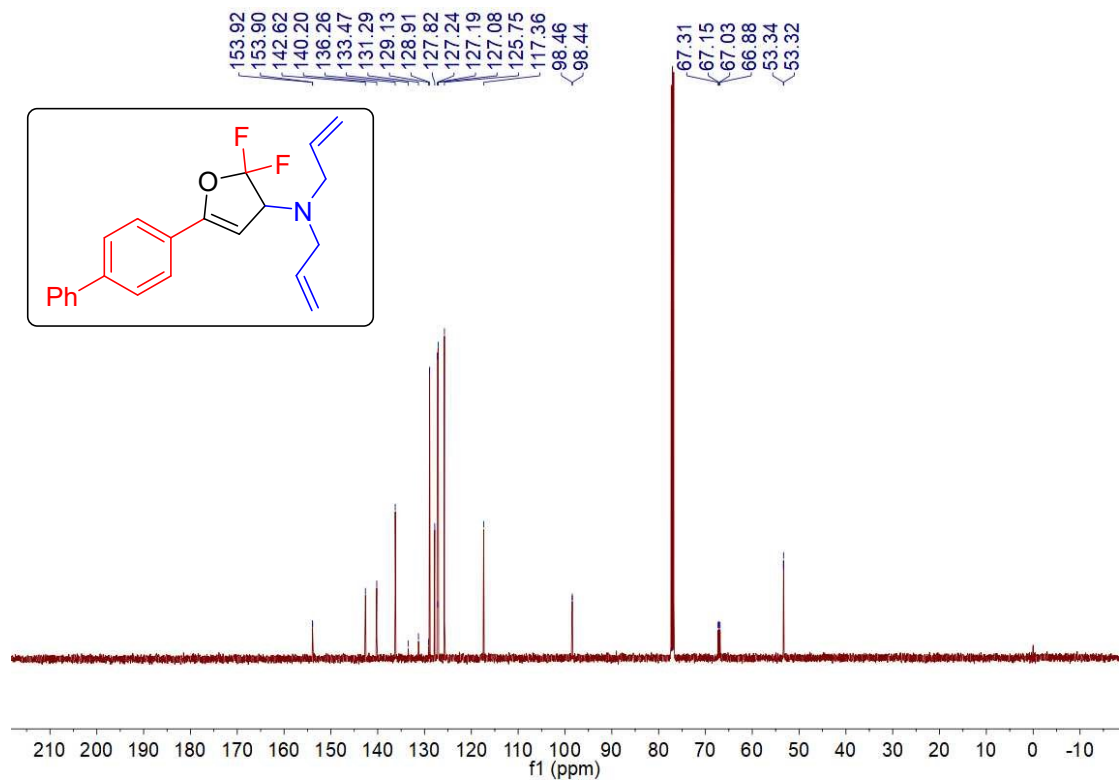

**<sup>19</sup>F spectrum (CDCl<sub>3</sub>) 5-([1,1'-biphenyl]-4-yl)-N,N-diallyl-2,2-difluoro-2,3-dihydrofuran-3-amine (5aa)**

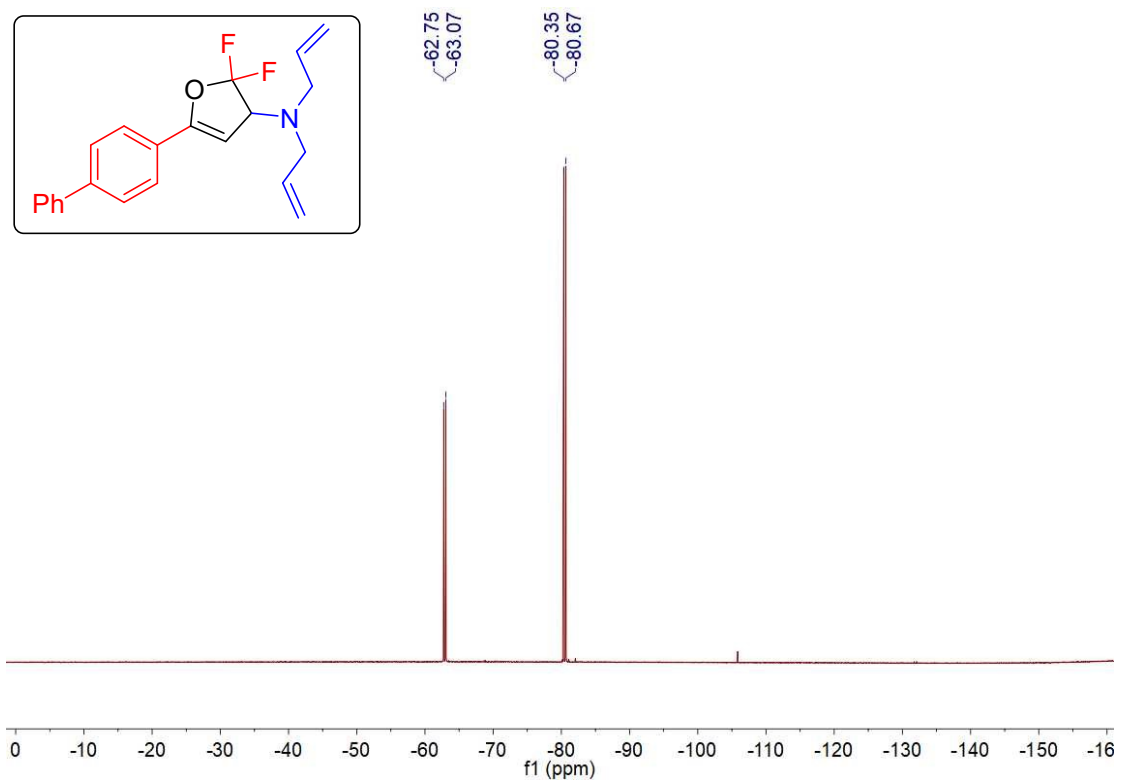

$^1\text{H}$  spectrum ( $\text{CDCl}_3$ ) 5-([1,1'-biphenyl]-2-yl)-N,N-diallyl-2,2-difluoro-2,3-dihydrofuran-3-amine (5ab)

7.69  
7.68  
7.67  
7.67  
7.43  
7.43  
7.42  
7.42  
7.42  
7.41  
7.40  
7.40  
7.40  
7.39  
7.39  
7.38  
7.38  
7.34  
7.34  
7.33  
7.32  
7.32  
7.31  
7.31  
7.30  
7.29  
5.69  
5.68  
5.66  
5.66  
5.17  
5.17  
5.16  
5.16  
5.13  
5.13  
5.12  
5.12  
5.11  
5.11  
5.10  
5.10  
5.09  
5.09  
5.09  
4.48  
4.47  
4.47  
3.16  
3.15  
3.14  
3.14

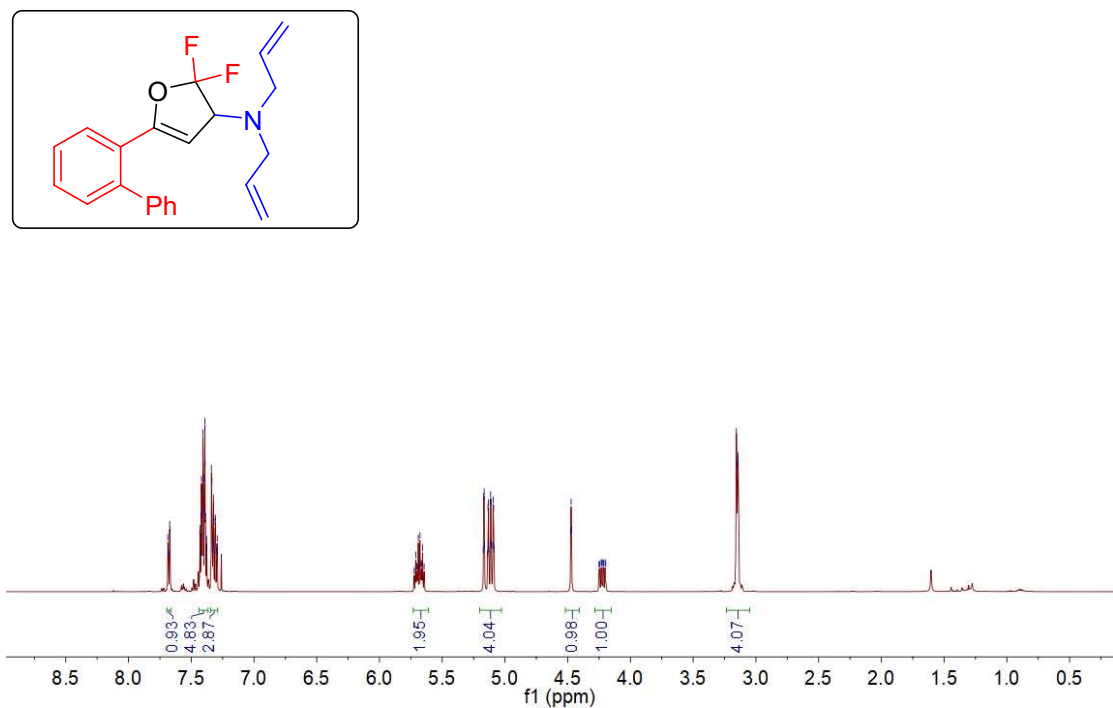

$^{13}\text{C}$  spectrum ( $\text{CDCl}_3$ ) 5-([1,1'-biphenyl]-2-yl)-N,N-diallyl-2,2-difluoro-2,3-dihydrofuran-3-amine (5ab)

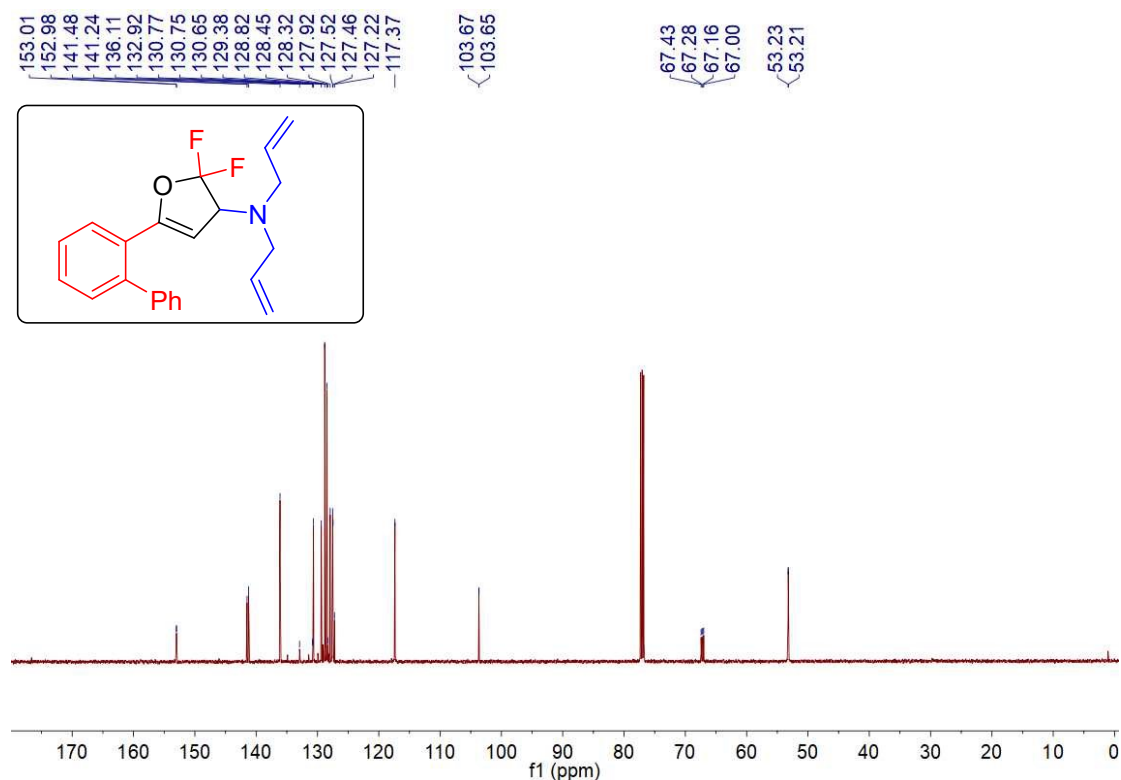

**<sup>19</sup>F spectrum (CDCl<sub>3</sub>) 5-([1,1'-biphenyl]-2-yl)-N,N-diallyl-2,2-difluoro-2,3-dihydrofuran-3-amine (5ab)**

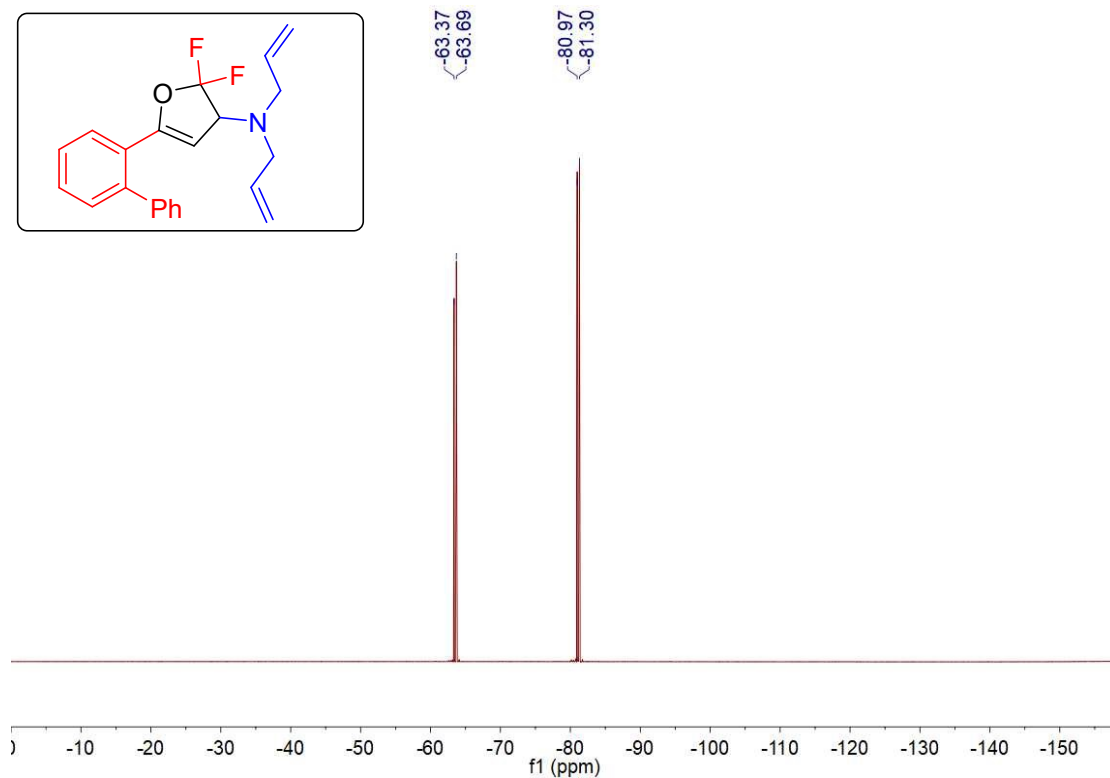

**<sup>1</sup>H spectrum (CDCl<sub>3</sub>) N,N-diallyl-2,2-difluoro-5-(4-fluorophenyl)-2,3-dihydrofuran-3-amine (5ac)**

7.40  
7.39  
7.39  
7.39  
7.38  
7.32  
7.31  
7.31  
7.30  
7.29  
7.29  
7.11  
7.10  
5.87  
5.84  
5.84  
5.83  
5.83  
5.81  
5.59  
5.58  
5.58  
5.28  
5.28  
5.27  
5.25  
5.25  
5.24  
5.24  
5.20  
5.20  
5.19  
5.19  
5.18  
5.18  
5.17  
5.17  
3.39  
3.38  
3.38  
3.36  
3.36  
3.35  
3.35  
3.35  
3.34  
3.31  
3.31  
3.29  
3.28

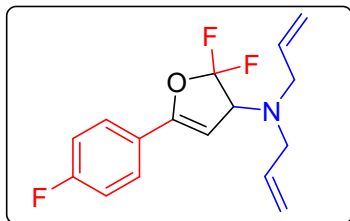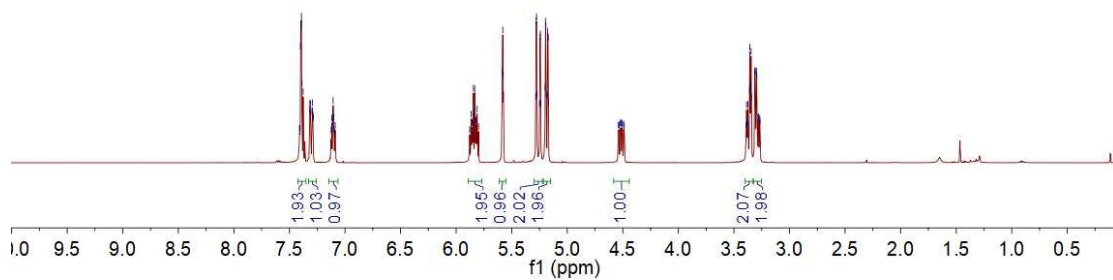

**<sup>13</sup>C spectrum (CDCl<sub>3</sub>) N,N-diallyl-2,2-difluoro-5-(4-fluorophenyl)-2,3-dihydrofuran-3-amine (5ac)**

163.79  
161.83  
152.90  
152.88  
152.85  
136.12  
133.32  
131.15  
130.42  
130.36  
130.28  
130.22  
128.98  
121.01  
120.98  
117.44  
116.85  
116.68  
112.44  
112.25  
99.76  
99.74  
67.24  
67.08  
66.96  
66.81  
53.33  
53.31

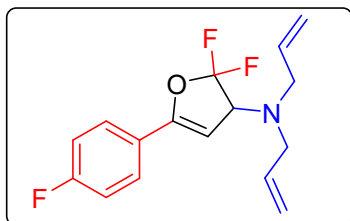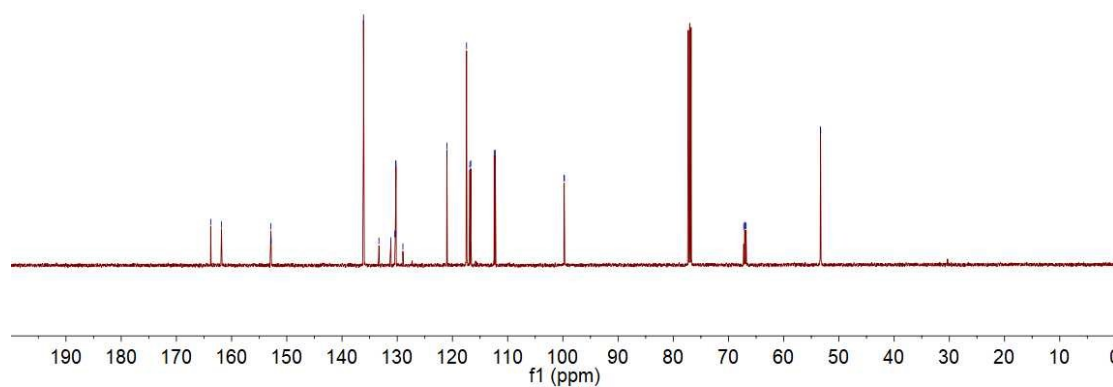

**<sup>19</sup>F spectrum (CDCl<sub>3</sub>) N,N-diallyl-2,2-difluoro-5-(4-fluorophenyl)-2,3-dihydrofuran-3-amine (5ac)**

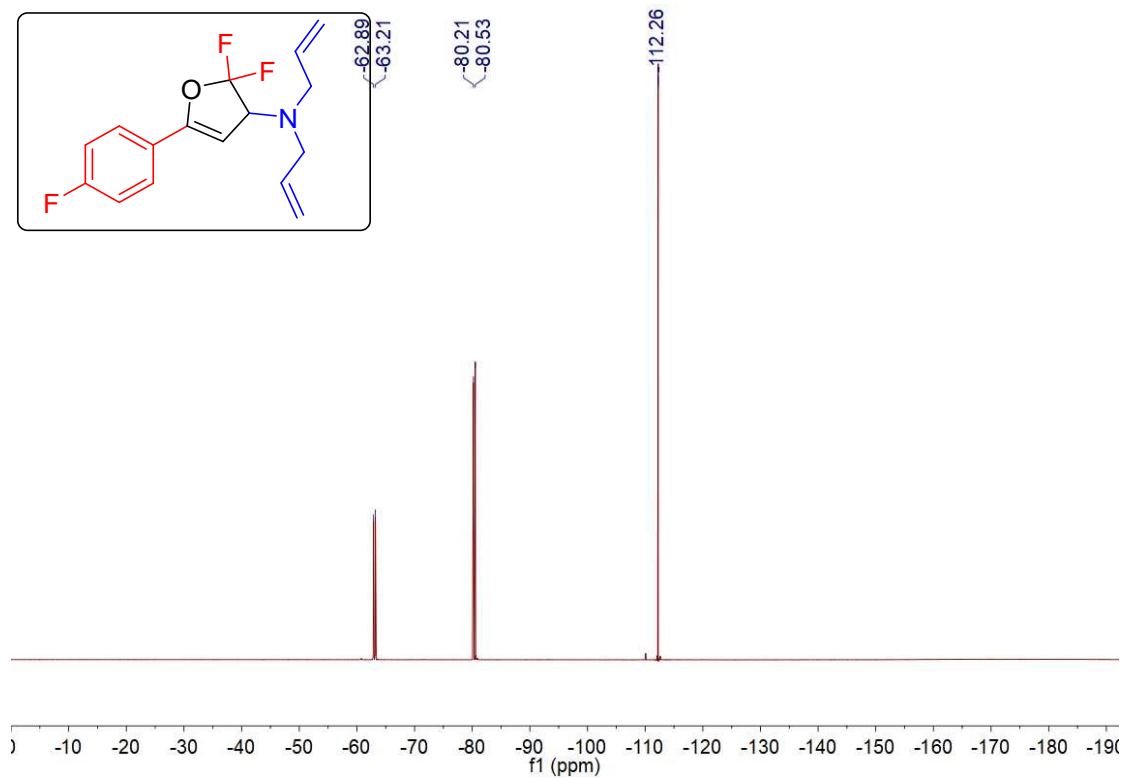

**<sup>1</sup>H spectrum (CDCl<sub>3</sub>) N,N-diallyl-5-(4-chlorophenyl)-2,2-difluoro-2,3-dihydrofuran-3-amine (5ad)**

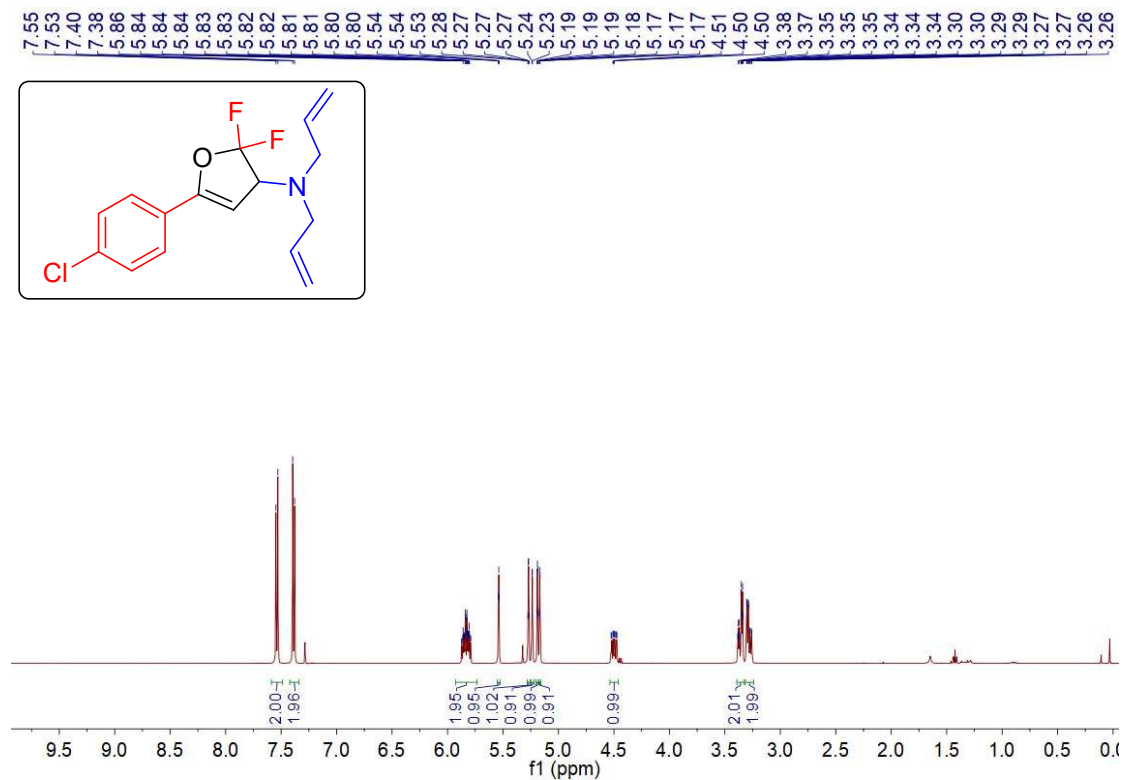

**<sup>13</sup>C spectrum (CDCl<sub>3</sub>) N,N-diallyl-5-(4-chlorophenyl)-2,2-difluoro-2,3-dihydrofuran-3-amine (5ad)**

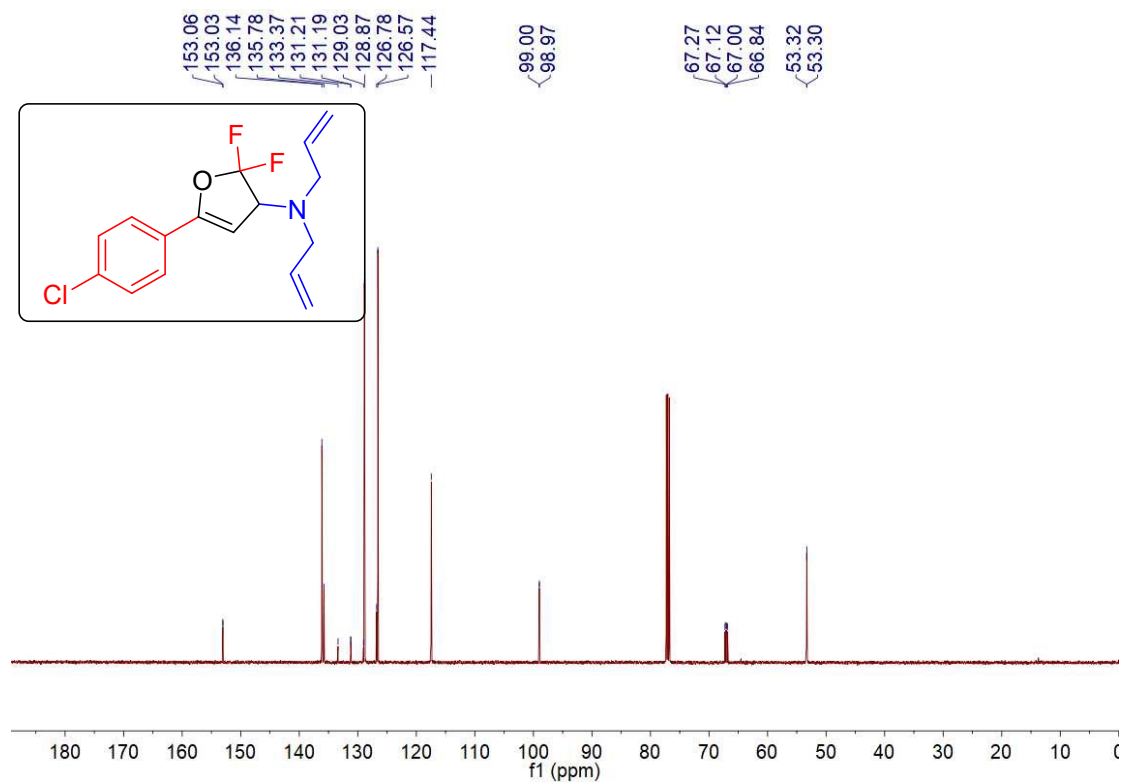

<sup>19</sup>F spectrum (CDCl<sub>3</sub>) N,N-diallyl-5-(4-chlorophenyl)-2,2-difluoro-2,3-dihydrofuran-3-amine (**5ad**)

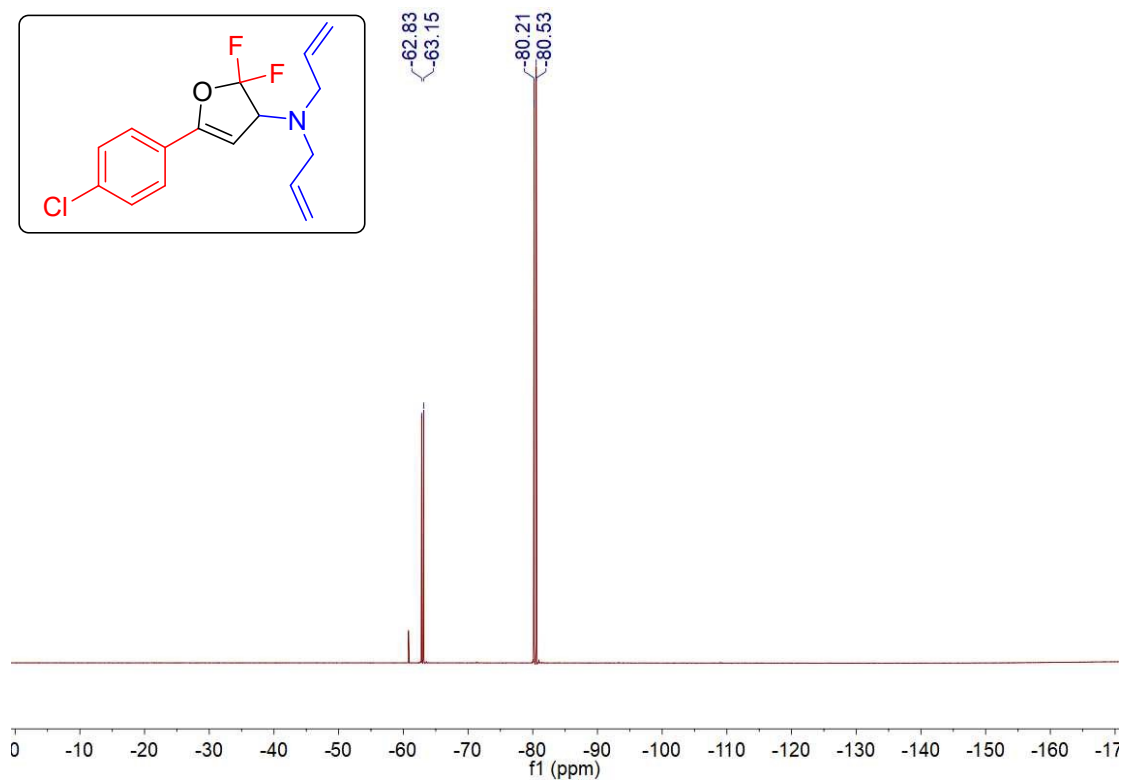

<sup>1</sup>H spectrum (CDCl<sub>3</sub>) N,N-diallyl-5-(4-bromophenyl)-2,2-difluoro-2,3-dihydrofuran-3-amine (**5ae**)

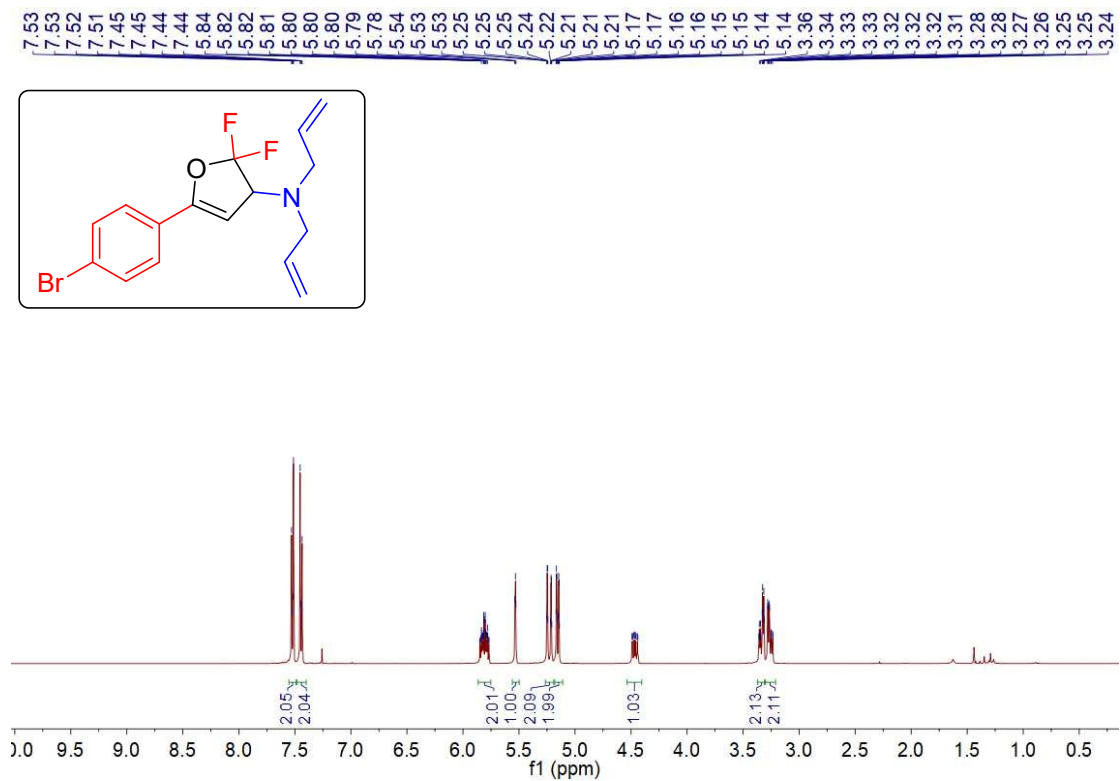

<sup>13</sup>C spectrum (CDCl<sub>3</sub>) N,N-diallyl-5-(4-bromophenyl)-2,2-difluoro-2,3-dihydrofuran-3-amine (5ae)

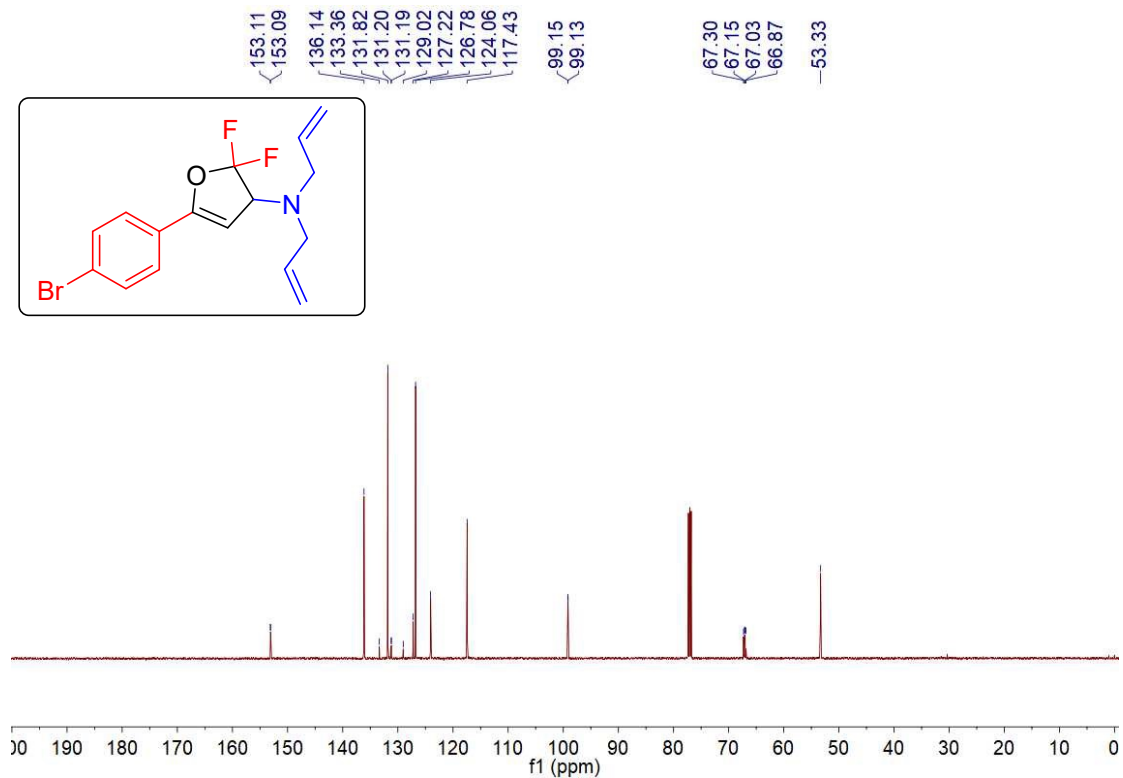

<sup>19</sup>F spectrum (CDCl<sub>3</sub>) N,N-diallyl-5-(4-bromophenyl)-2,2-difluoro-2,3-dihydrofuran-3-amine (5ae)



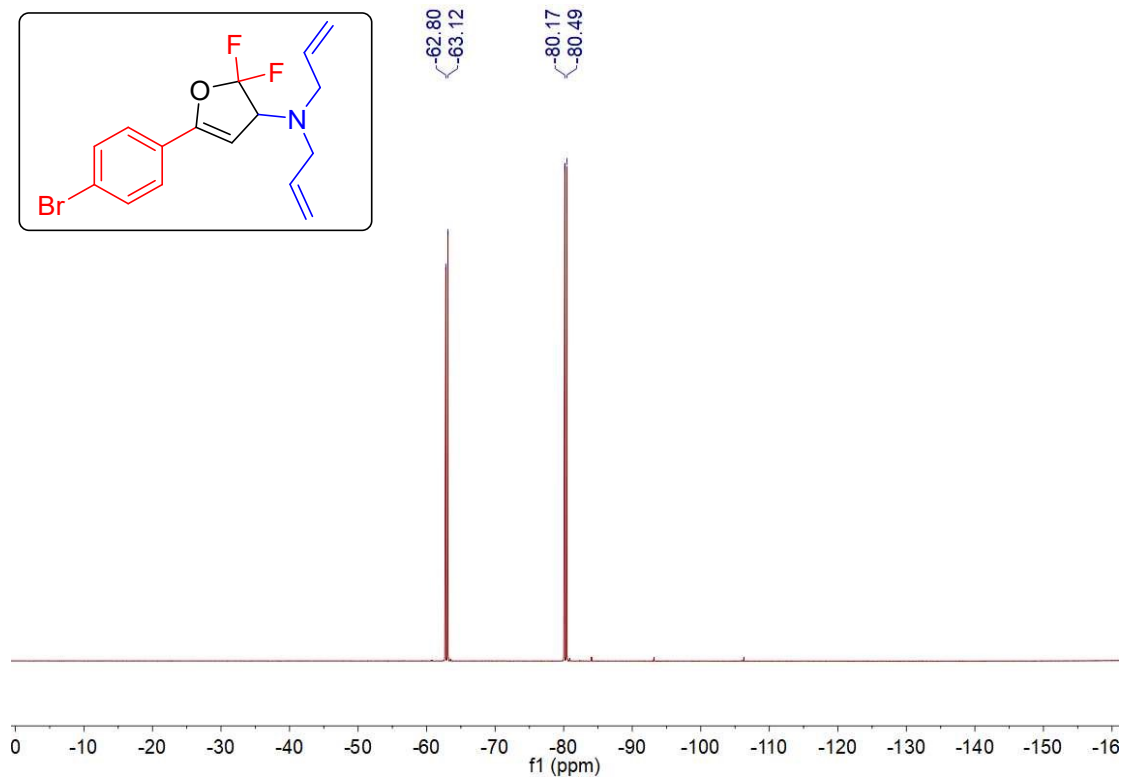

**<sup>1</sup>H spectrum (CDCl<sub>3</sub>) N,N-diallyl-2,2-difluoro-5-(4-iodophenyl)-2,3-dihydrofuran-3-amine (5af)**

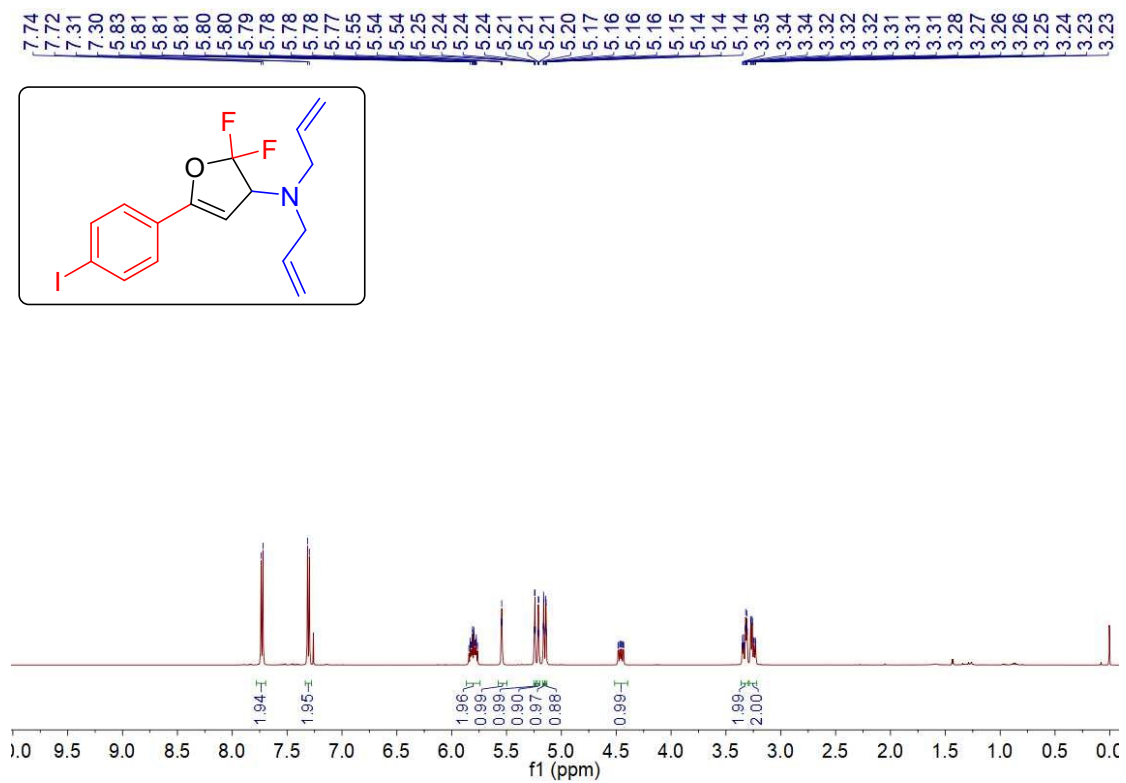

**<sup>13</sup>C spectrum (CDCl<sub>3</sub>) N,N-diallyl-2,2-difluoro-5-(4-iodophenyl)-2,3-dihydrofuran-3-amine (5af)**

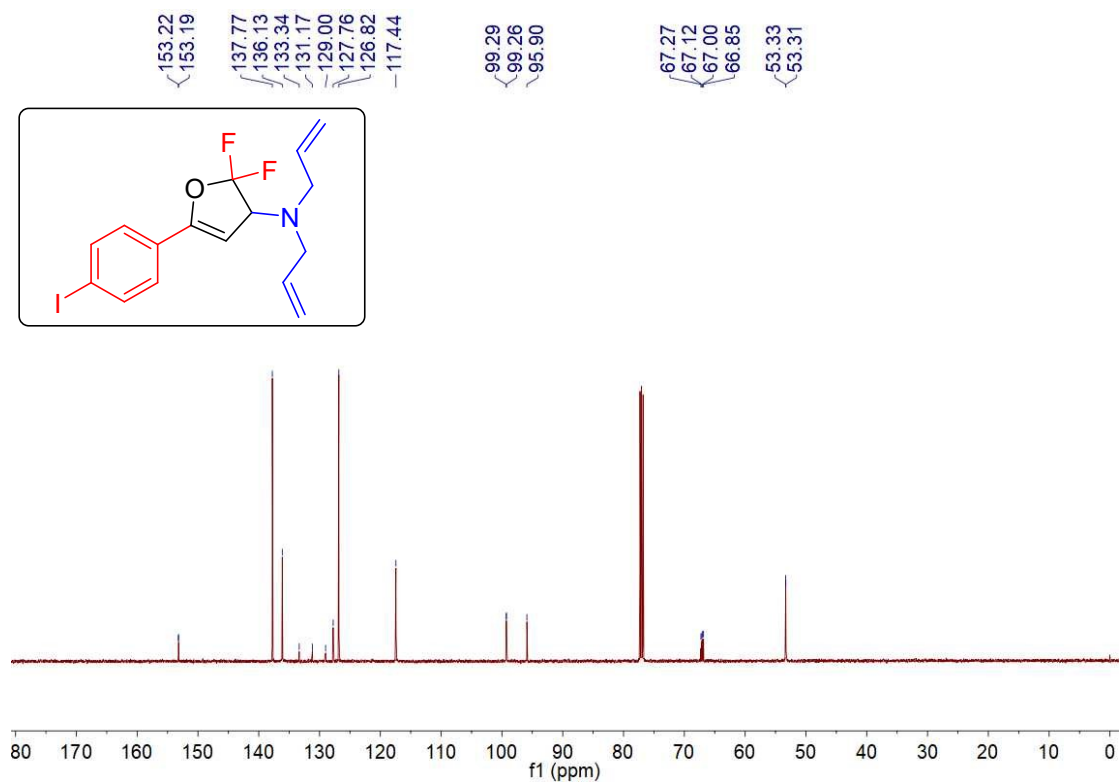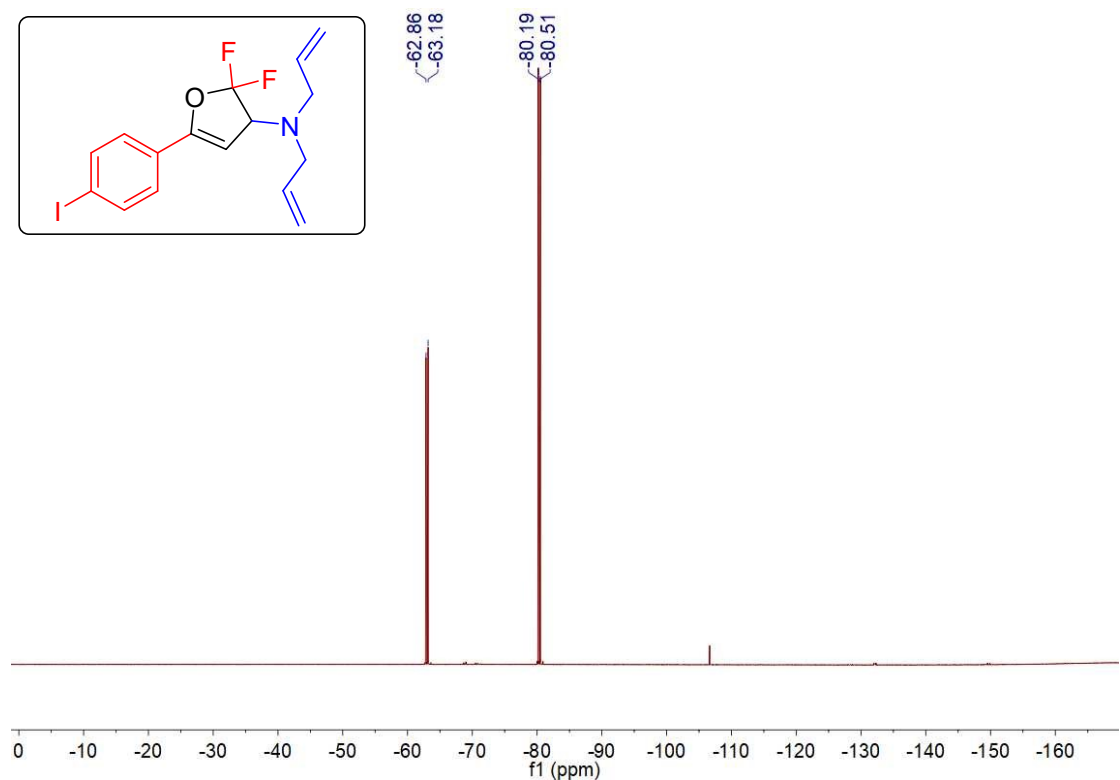

<sup>1</sup>H spectrum (CDCl<sub>3</sub>) N,N-diallyl-2,2-difluoro-5-(4-(trifluoromethyl)phenyl)-2,3-dihydrofuran-3-amine (5ag)

7.70  
7.69  
7.66  
7.64  
5.84  
5.83  
5.82  
5.81  
5.80  
5.79  
5.79  
5.66  
5.66  
5.26  
5.26  
5.25  
5.23  
5.22  
5.22  
5.18  
5.17  
5.17  
5.16  
5.15  
5.15  
5.15  
3.36  
3.36  
3.35  
3.35  
3.34  
3.33  
3.33  
3.32  
3.32  
3.29  
3.29  
3.28  
3.28  
3.27  
3.26  
3.25  
3.25

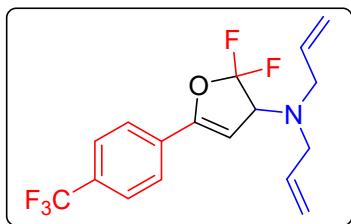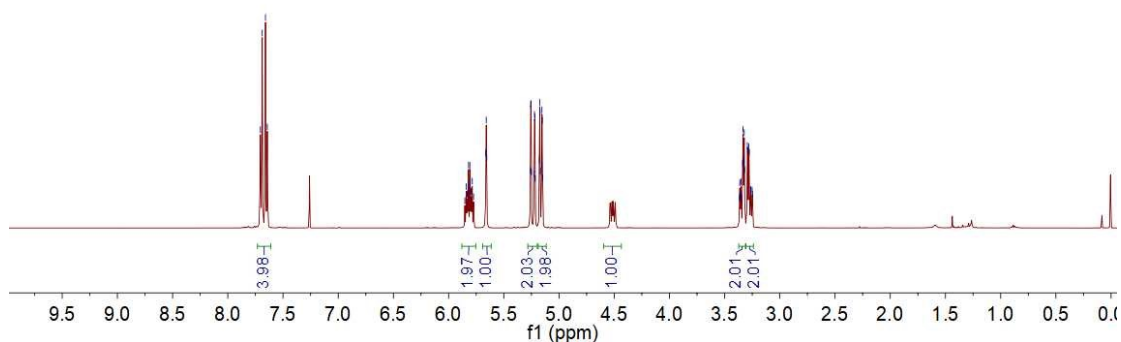

**<sup>13</sup>C spectrum (CDCl<sub>3</sub>) N,N-diallyl-2,2-difluoro-5-(4-(trifluoromethyl)phenyl)-2,3-dihydrofuran-3-amine (5ag)**

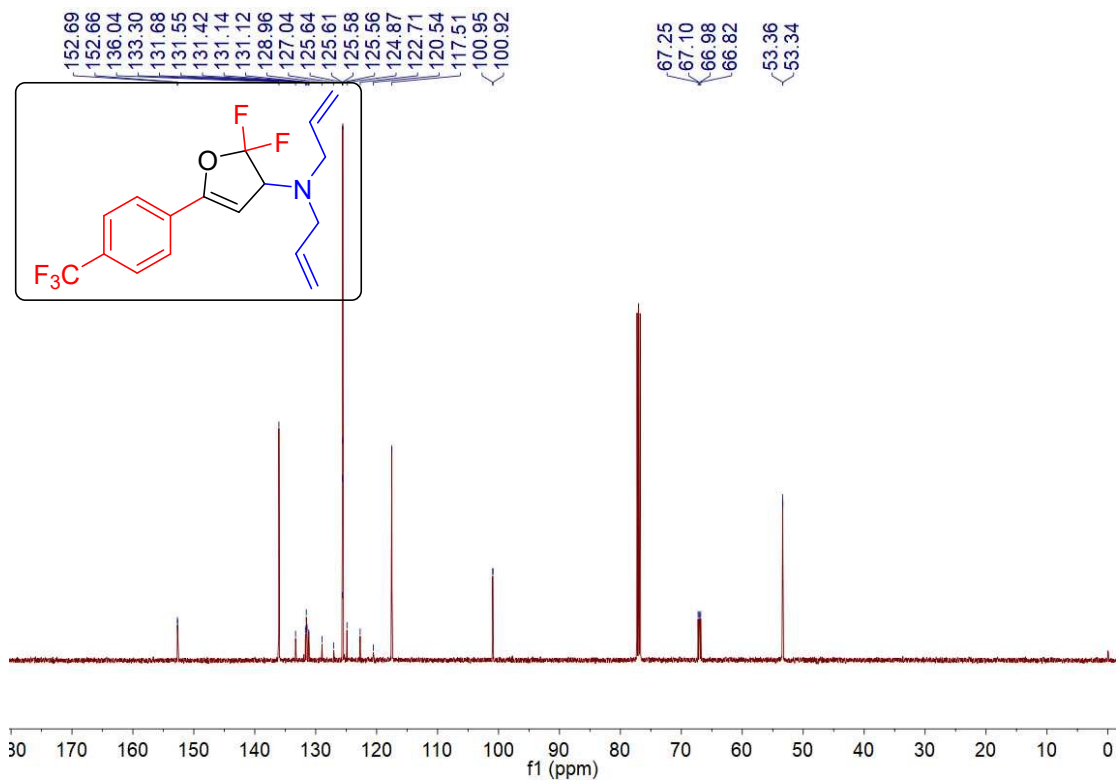

**<sup>19</sup>F spectrum (CDCl<sub>3</sub>) N,N-diallyl-2,2-difluoro-5-(4-(trifluoromethyl)phenyl)-2,3-dihydrofuran-3-amine (5ag)**

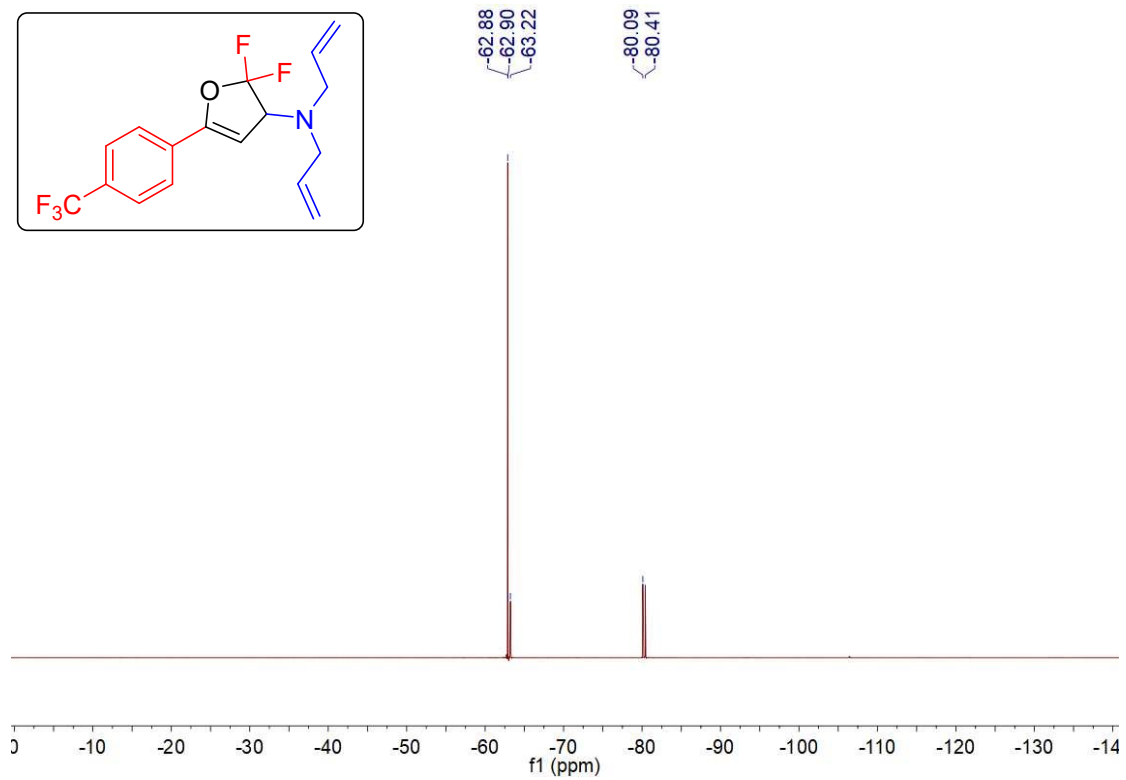

**<sup>1</sup>H spectrum (CDCl<sub>3</sub>) N,N-diallyl-2,2-difluoro-5-(2-(trifluoromethyl)phenyl)-2,3-dihydrofuran-3-amine (5ah)**

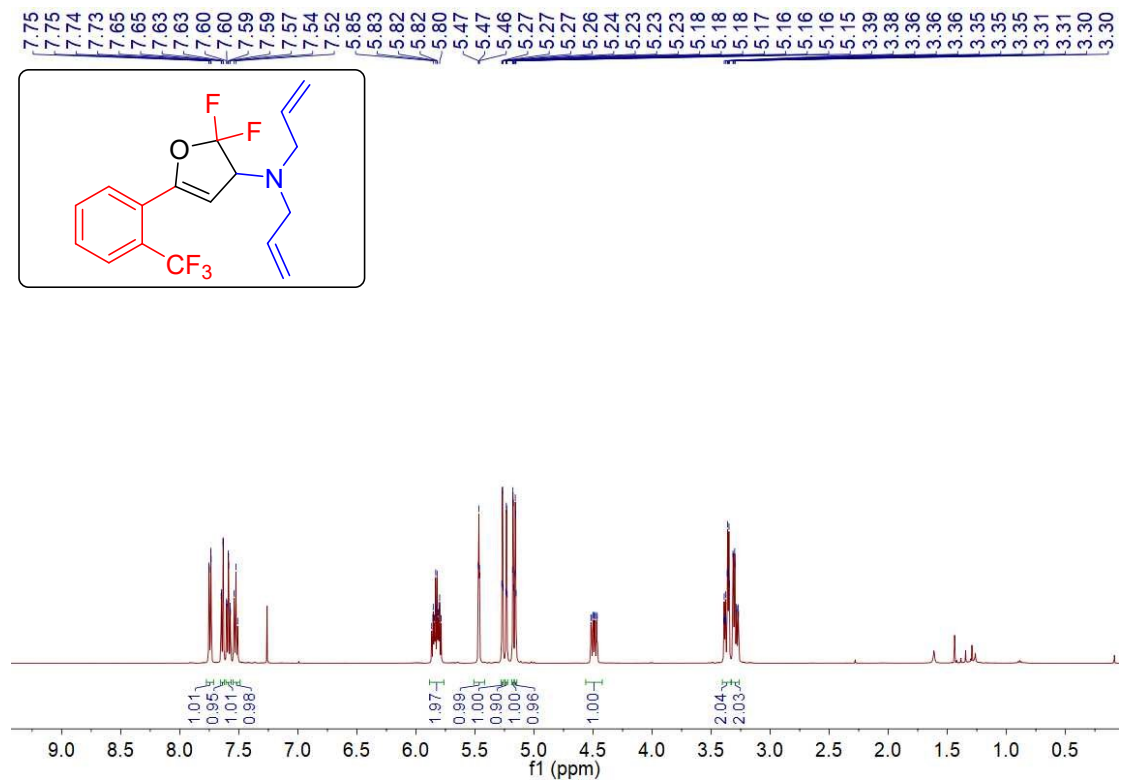

**<sup>13</sup>C spectrum (CDCl<sub>3</sub>) N,N-diallyl-2,2-difluoro-5-(2-(trifluoromethyl)phenyl)-2,3-dihydrofuran-3-amine (5ah)**

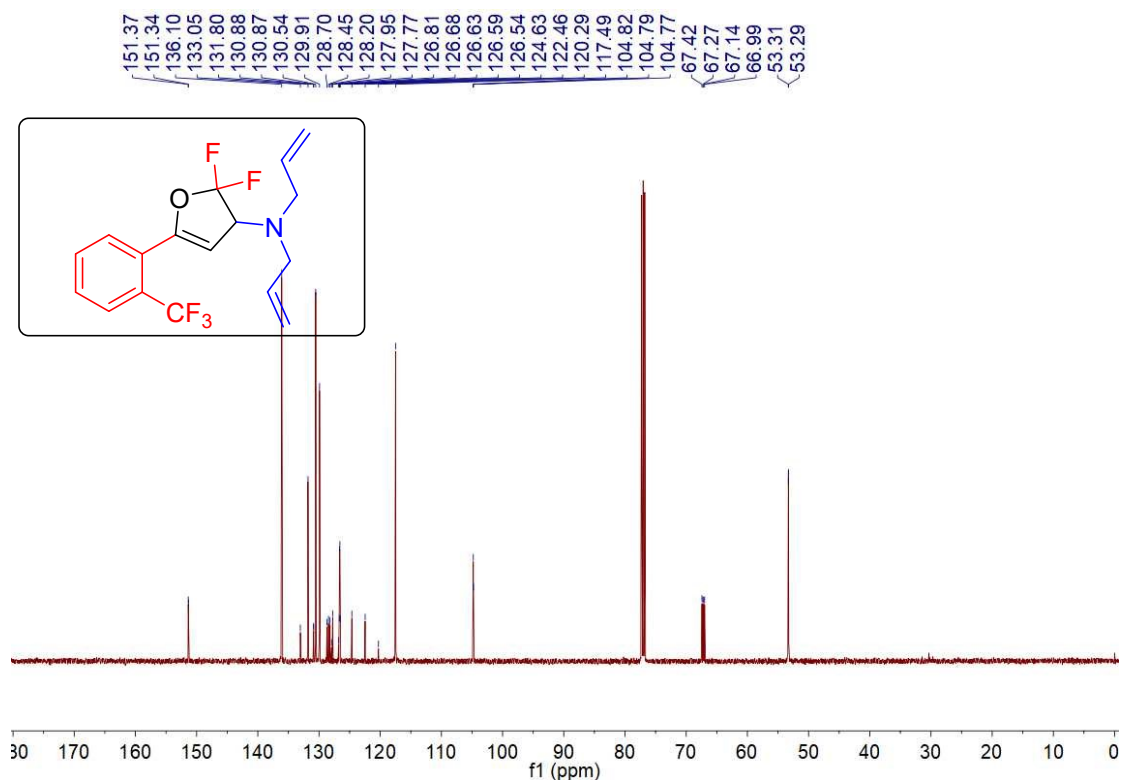

**<sup>19</sup>F spectrum (CDCl<sub>3</sub>) N,N-diallyl-2,2-difluoro-5-(2-(trifluoromethyl)phenyl)-2,3-dihydrofuran-3-amine (5ah)**

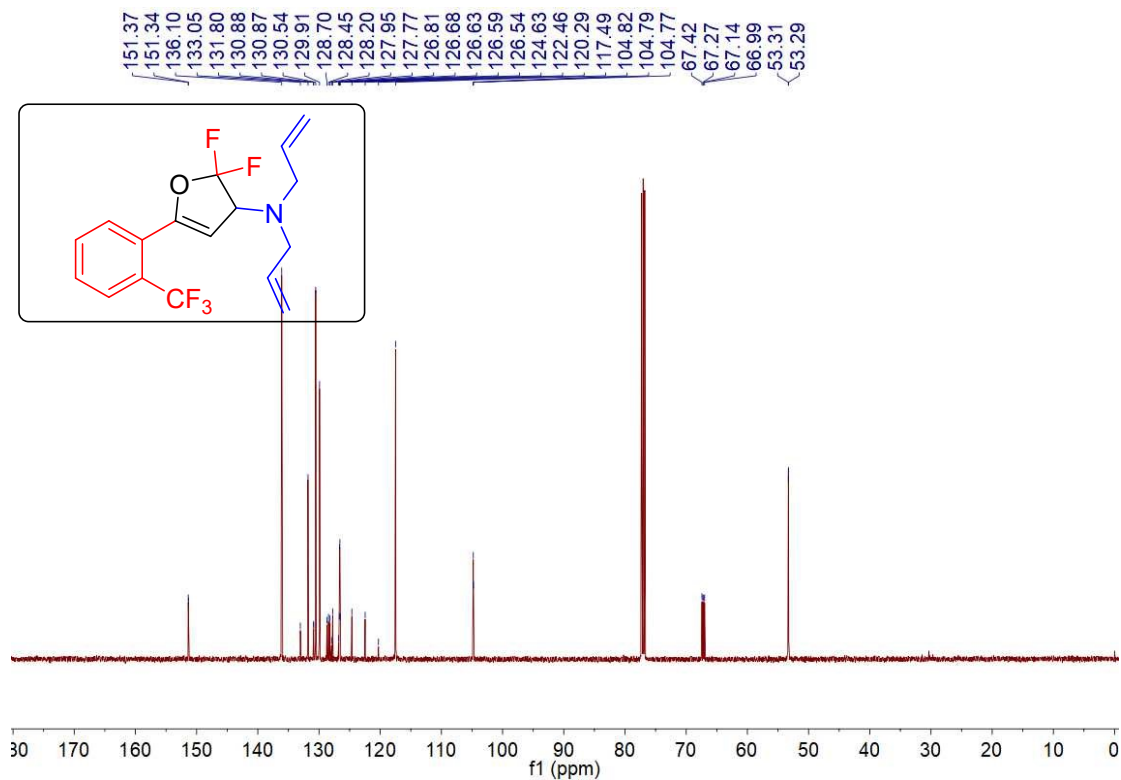

**<sup>1</sup>H spectrum (CDCl<sub>3</sub>) 4-(4-(diallylamino)-5,5-difluoro-4,5-dihydrofuran-2-yl)benzotrile (5ai)**

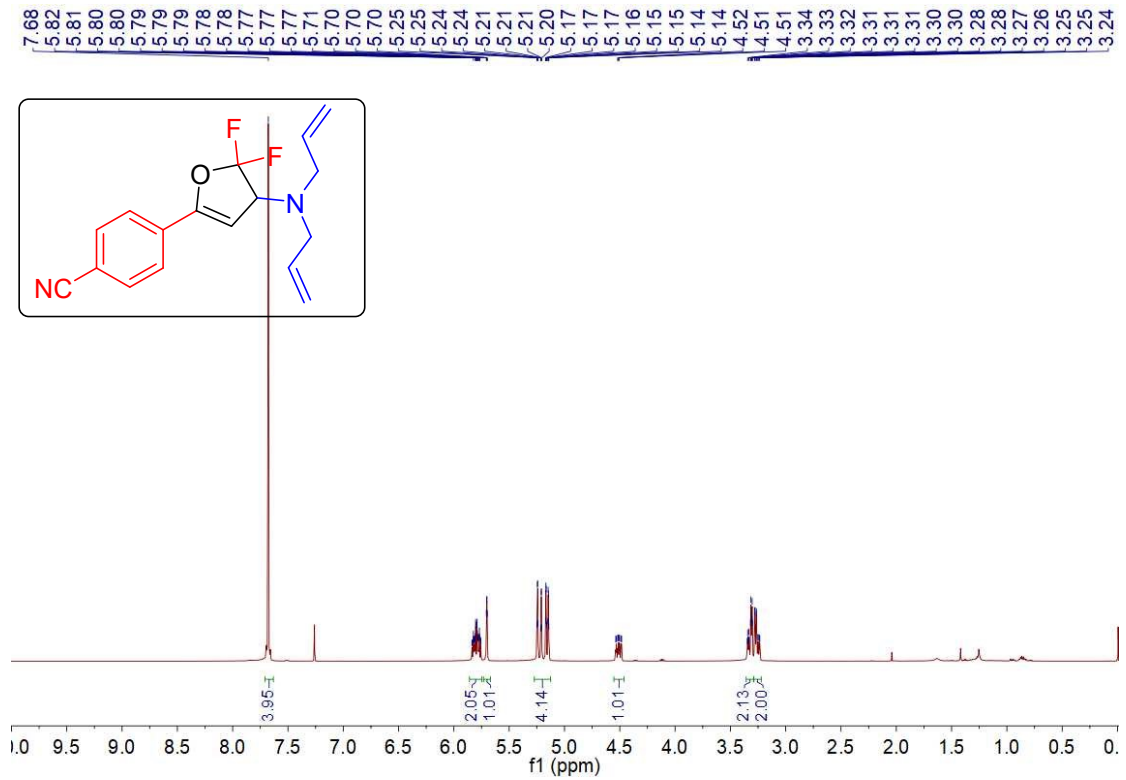

**<sup>13</sup>C spectrum (CDCl<sub>3</sub>) 4-(4-(diallylamino)-5,5-difluoro-4,5-dihydrofuran-2-yl)benzotrile (5ai)**

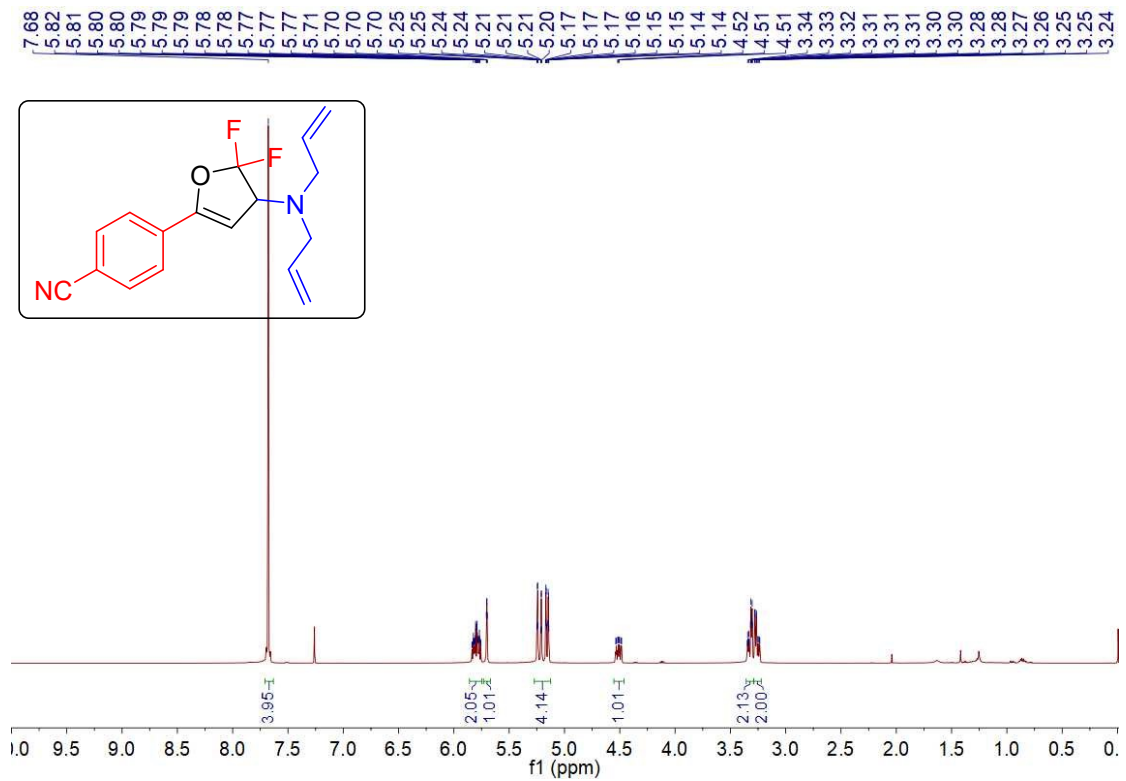

**<sup>19</sup>F spectrum (CDCl<sub>3</sub>) 4-(4-(diallylamino)-5,5-difluoro-4,5-dihydrofuran-2-yl)benzotrile (5ai)**

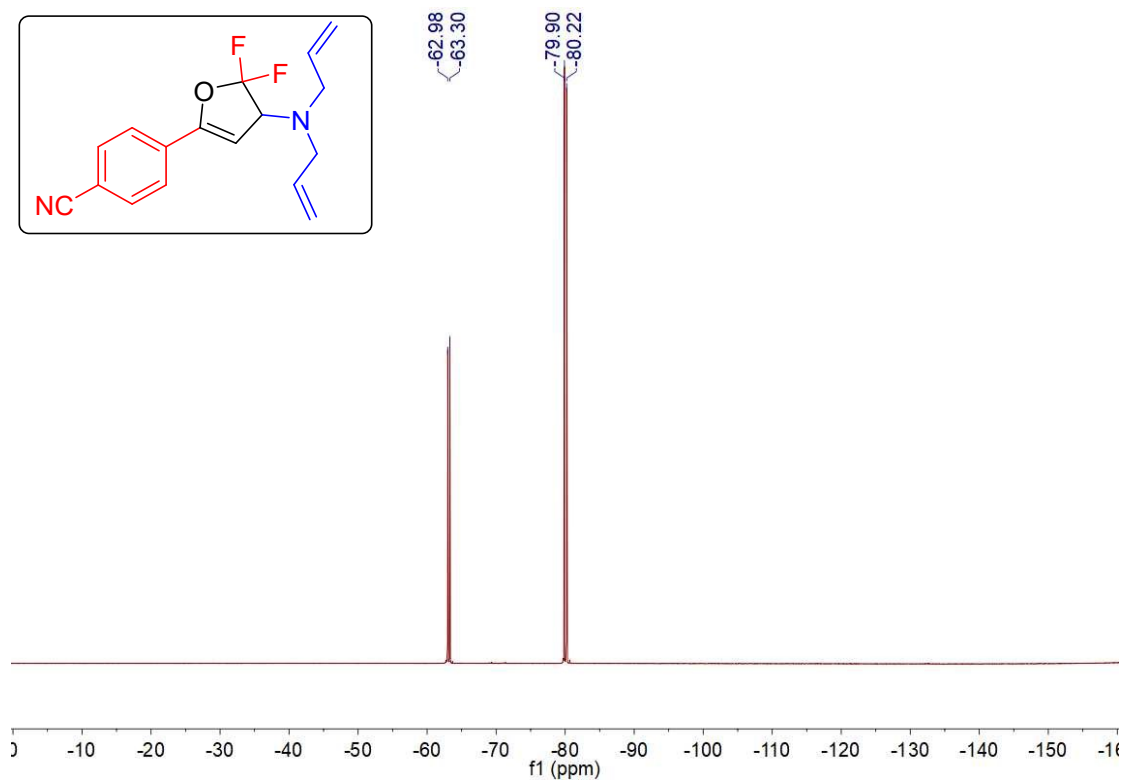

**<sup>1</sup>H spectrum (CDCl<sub>3</sub>) N,N-diallyl-2,2-difluoro-5-(4-methoxyphenyl)-2,3-dihydrofuran-3-amine (5aj)**

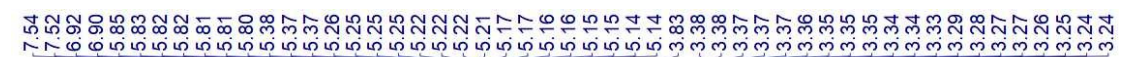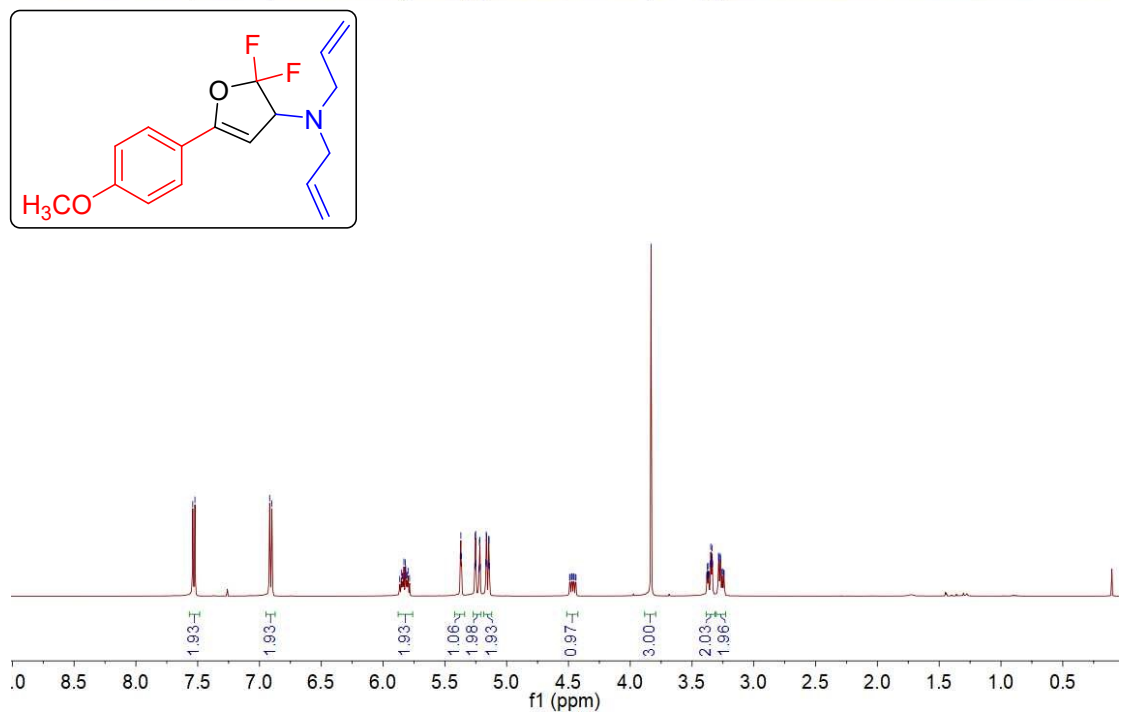

**<sup>13</sup>C spectrum (CDCl<sub>3</sub>) N,N-diallyl-2,2-difluoro-5-(4-methoxyphenyl)-2,3-dihydrofuran-3-amine (5aj)**

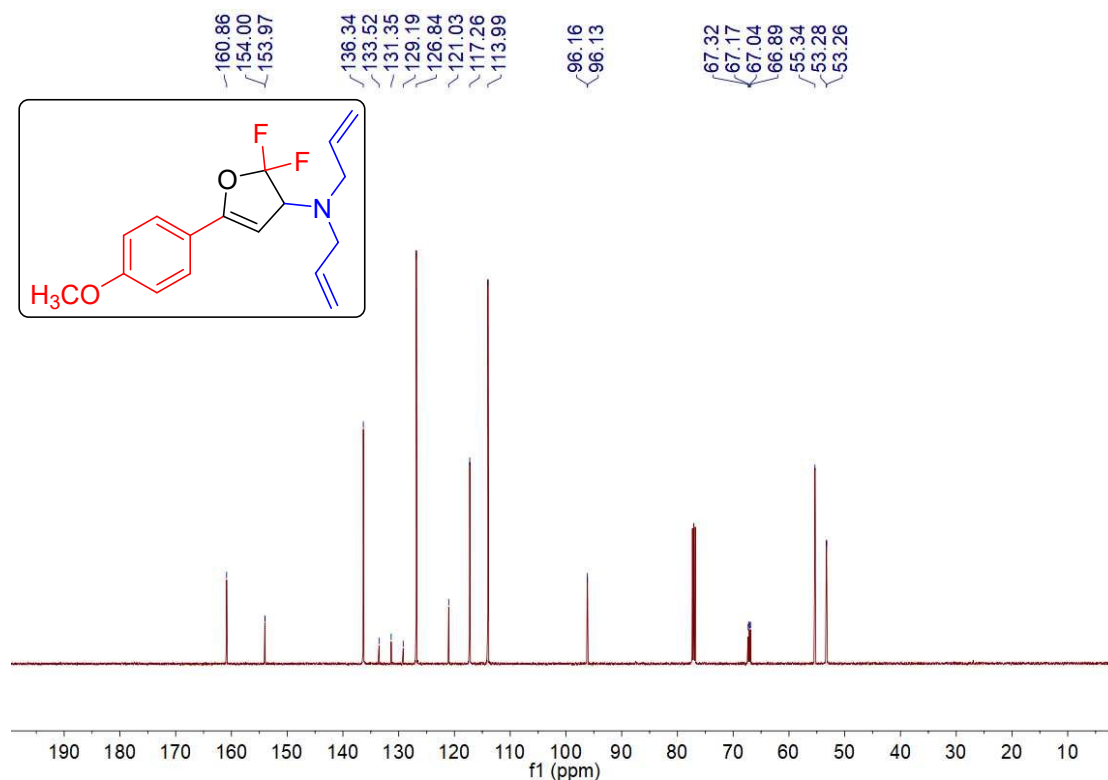

**<sup>19</sup>F** spectrum (CDCl<sub>3</sub>) N,N-diallyl-2,2-difluoro-5-(4-methoxyphenyl)-2,3-dihydrofuran-3-amine (**5aj**)

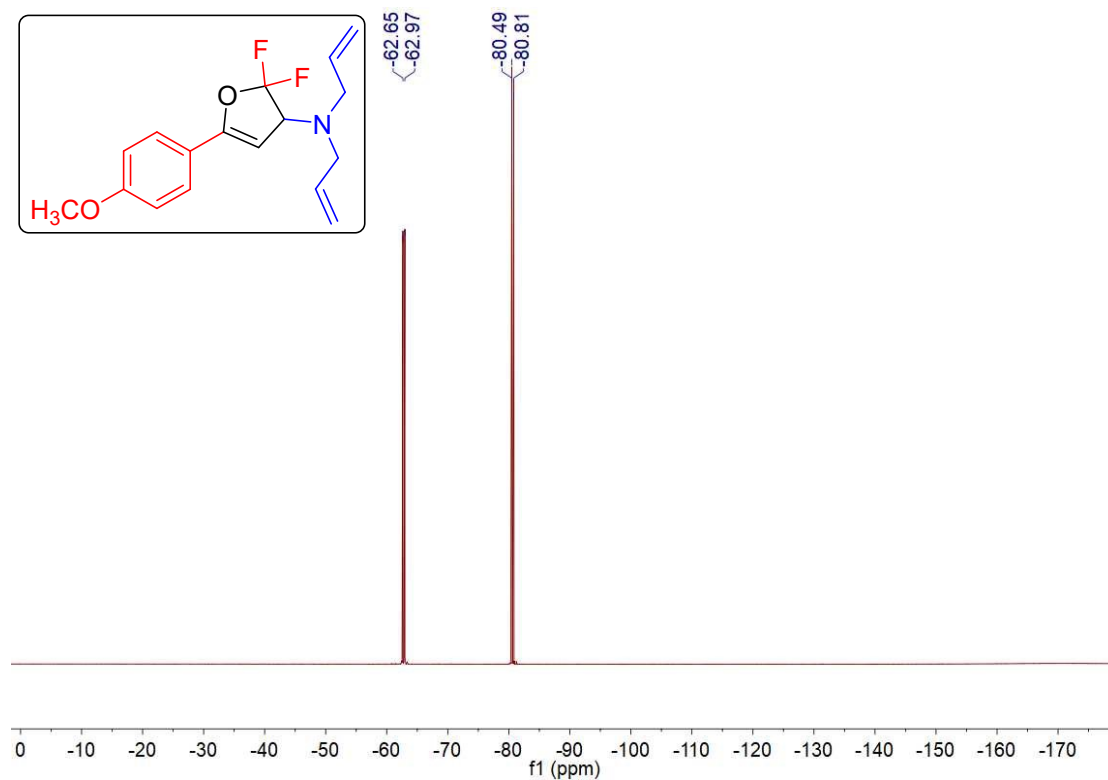

**<sup>1</sup>H** spectrum (CDCl<sub>3</sub>) N,N-diallyl-2,2-difluoro-5-(naphthalen-2-yl)-2,3-dihydrofuran-3-amine (**5ak**)



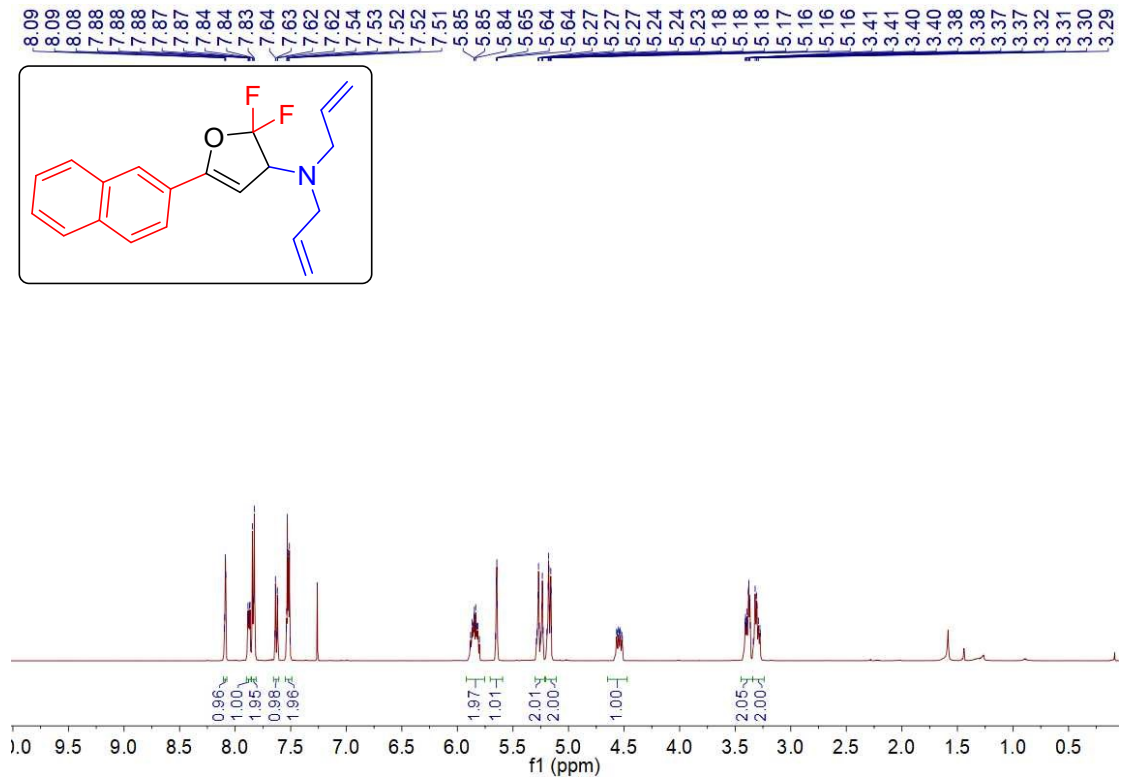

**<sup>13</sup>C spectrum (CDCl<sub>3</sub>) N,N-diallyl-2,2-difluoro-5-(naphthalen-2-yl)-2,3-dihydrofuran-3-amine (5ak)**

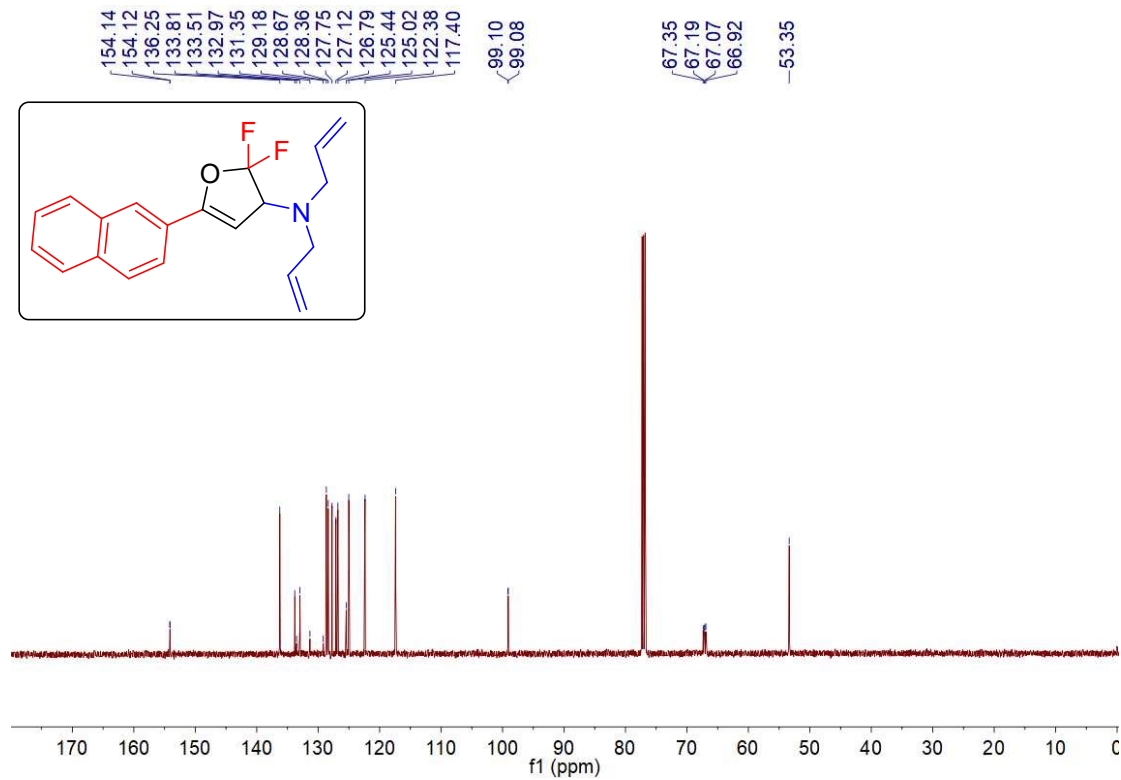

**<sup>19</sup>F spectrum (CDCl<sub>3</sub>) N,N-diallyl-2,2-difluoro-5-(naphthalen-2-yl)-2,3-dihydrofuran-3-amine (5ak)**

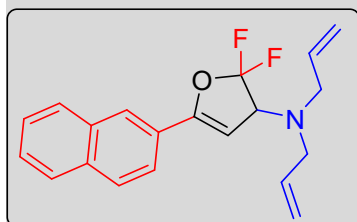

$^1\text{H}$  spectrum ( $\text{CDCl}_3$ ) N,N-diallyl-2,2-difluoro-5-(pyren-4-yl)-2,3-dihydrofuran-3-amine (5a)

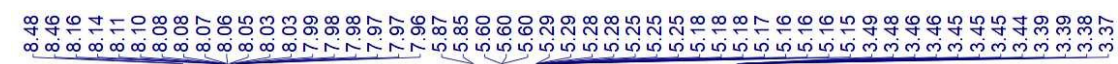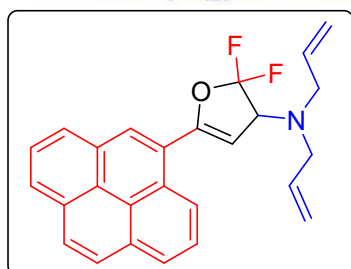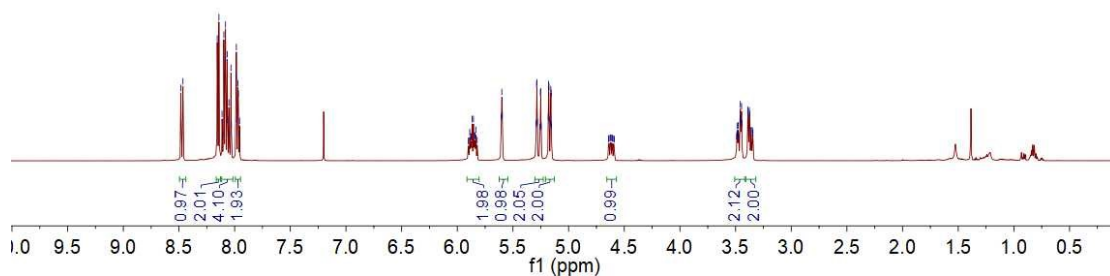

$^{13}\text{C}$  spectrum ( $\text{CDCl}_3$ ) N,N-diallyl-2,2-difluoro-5-(pyren-4-yl)-2,3-dihydrofuran-3-amine (5a)

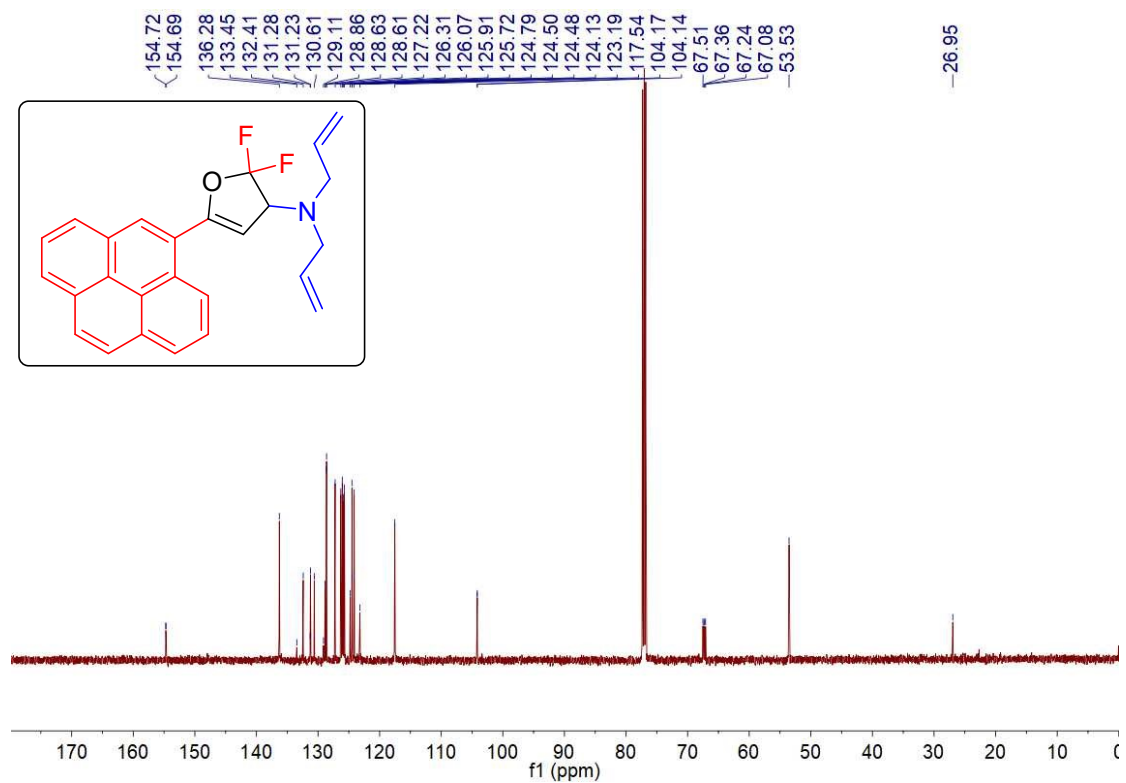

**<sup>19</sup>F spectrum (CDCl<sub>3</sub>) N,N-diallyl-2,2-difluoro-5-(pyren-4-yl)-2,3-dihydrofuran-3-amine (5a)**

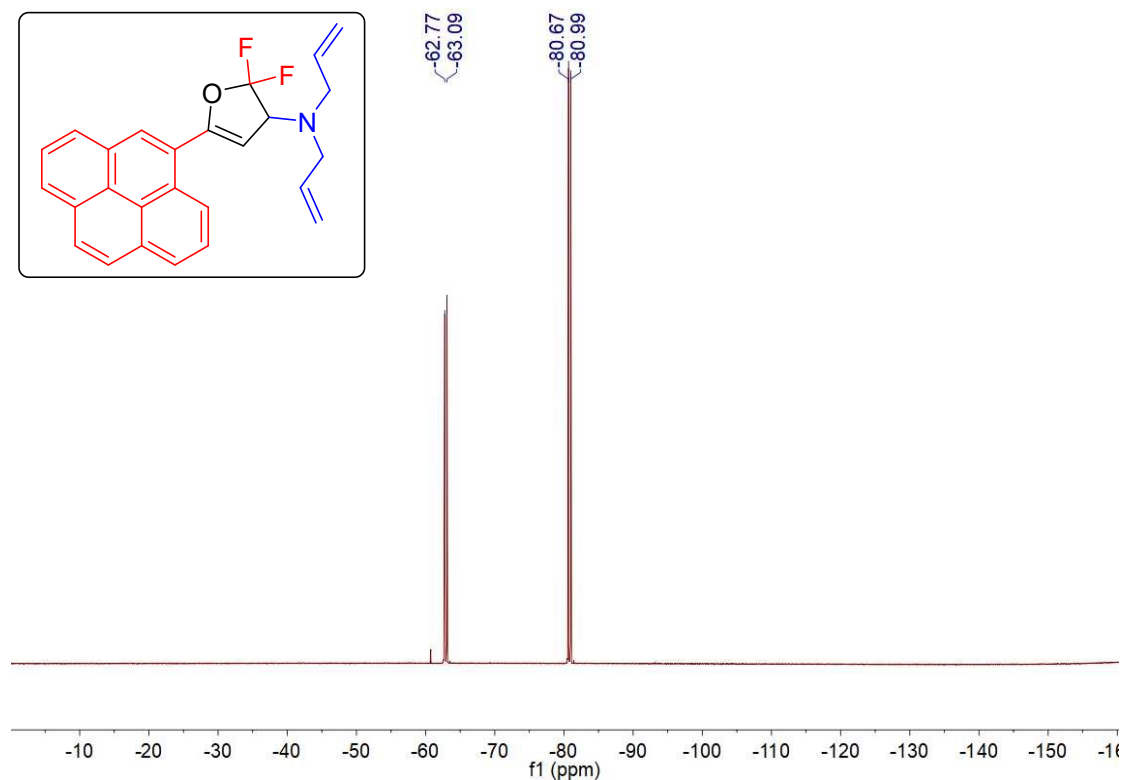

**<sup>1</sup>H spectrum (CDCl<sub>3</sub>) N,N-diallyl-5-(9H-fluoren-2-yl)-2,2-difluoro-2,3-dihydrofuran-3-amine (5am)**

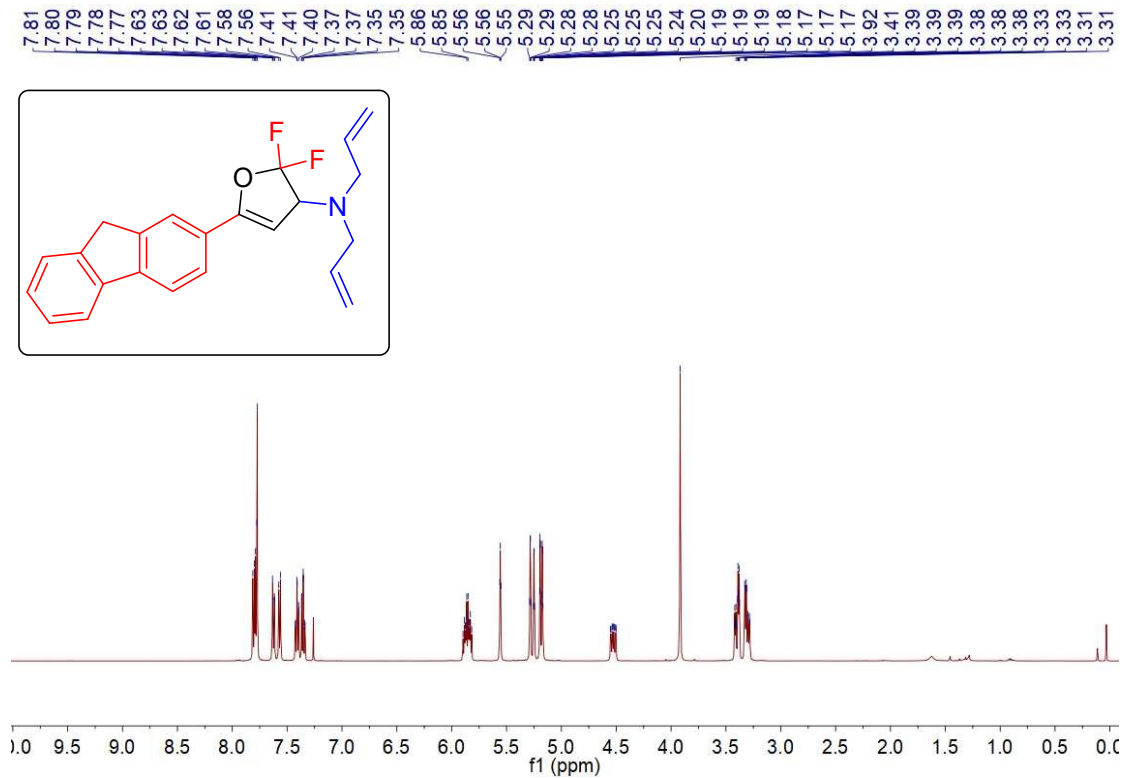

**<sup>13</sup>C spectrum (CDCl<sub>3</sub>) N,N-diallyl-5-(9H-fluoren-2-yl)-2,2-difluoro-2,3-dihydrofuran-3-amine (5am)**

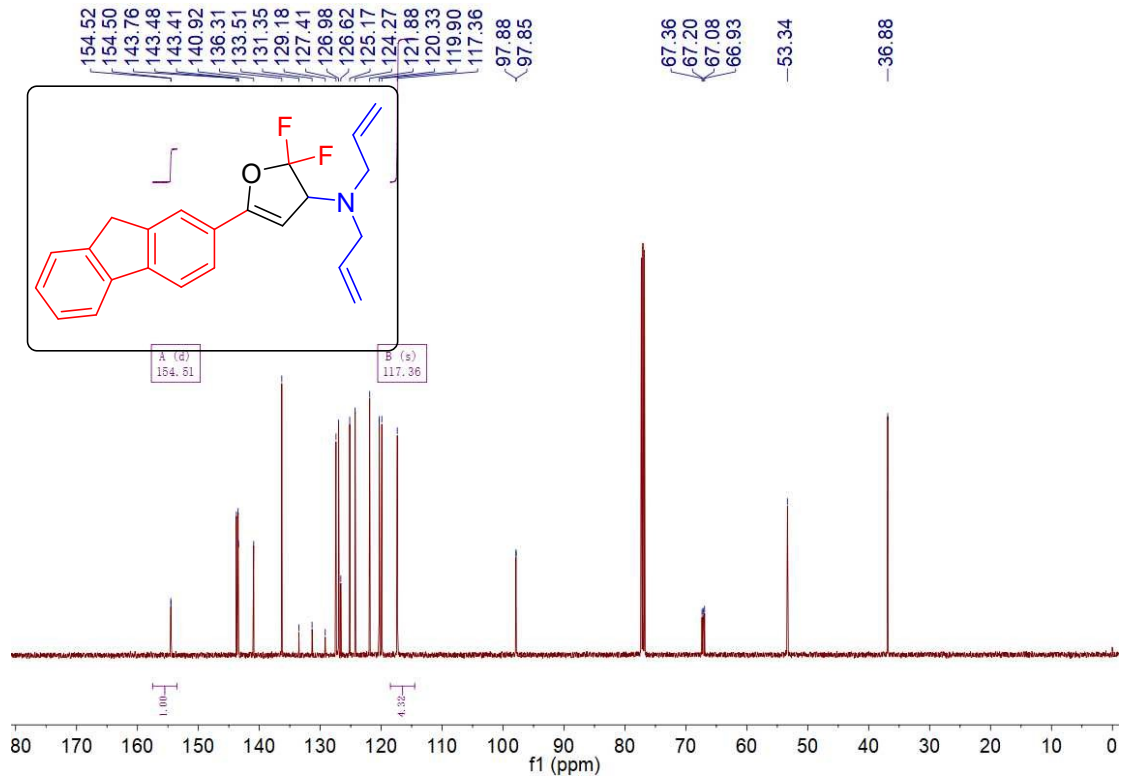

**<sup>19</sup>F spectrum (CDCl<sub>3</sub>) N,N-diallyl-5-(9H-fluoren-2-yl)-2,2-difluoro-2,3-dihydrofuran-3-amine (5am)**

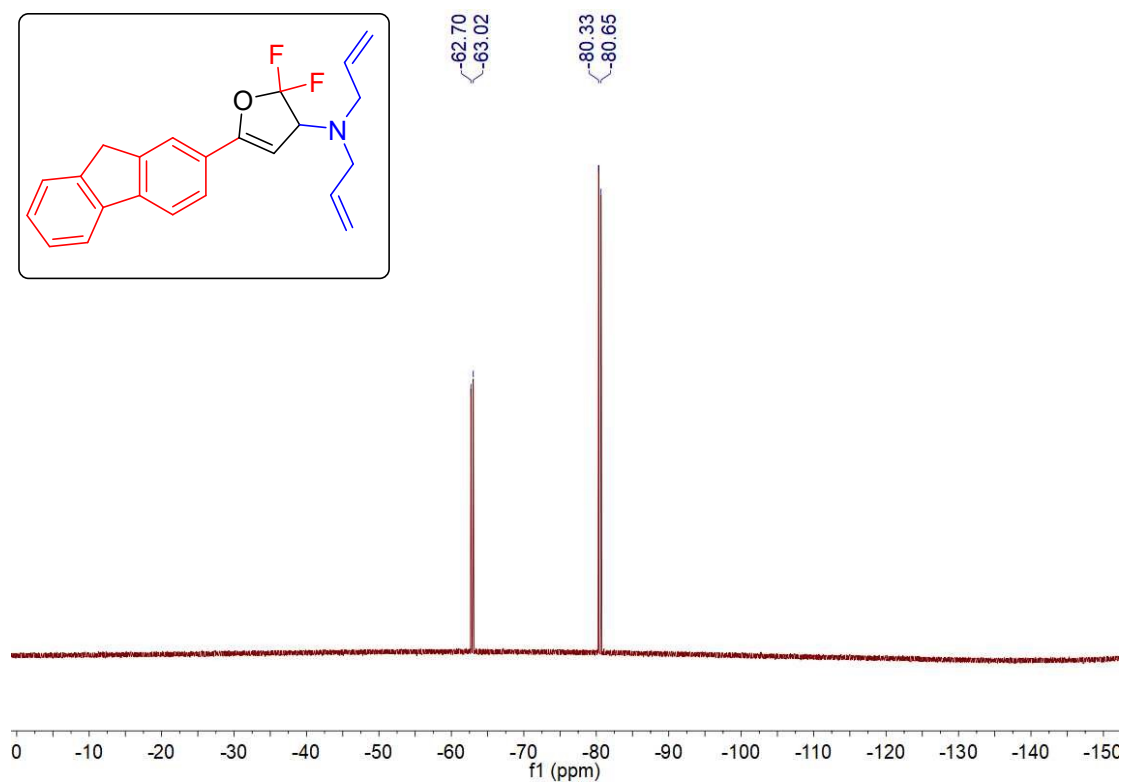

$^1\text{H}$  spectrum ( $\text{CDCl}_3$ ) **N,N**-diallyl-5-(4-bromo-2-fluorophenyl)-2,2-difluoro-2,3-dihydrofuran-3-amine (**5an**)

7.51  
7.50  
7.48  
7.36  
7.35  
7.34  
7.33  
7.33  
7.32  
7.30  
7.30  
5.83  
5.81  
5.81  
5.80  
5.80  
5.80  
5.79  
5.79  
5.78  
5.78  
5.77  
5.77  
5.76  
5.76  
5.25  
5.24  
5.21  
5.21  
5.17  
5.16  
5.15  
5.14  
4.49  
3.35  
3.34  
3.34  
3.32  
3.32  
3.31  
3.31  
3.31  
3.30  
3.28  
3.27  
3.26  
3.26  
3.25  
3.24  
3.23  
3.23

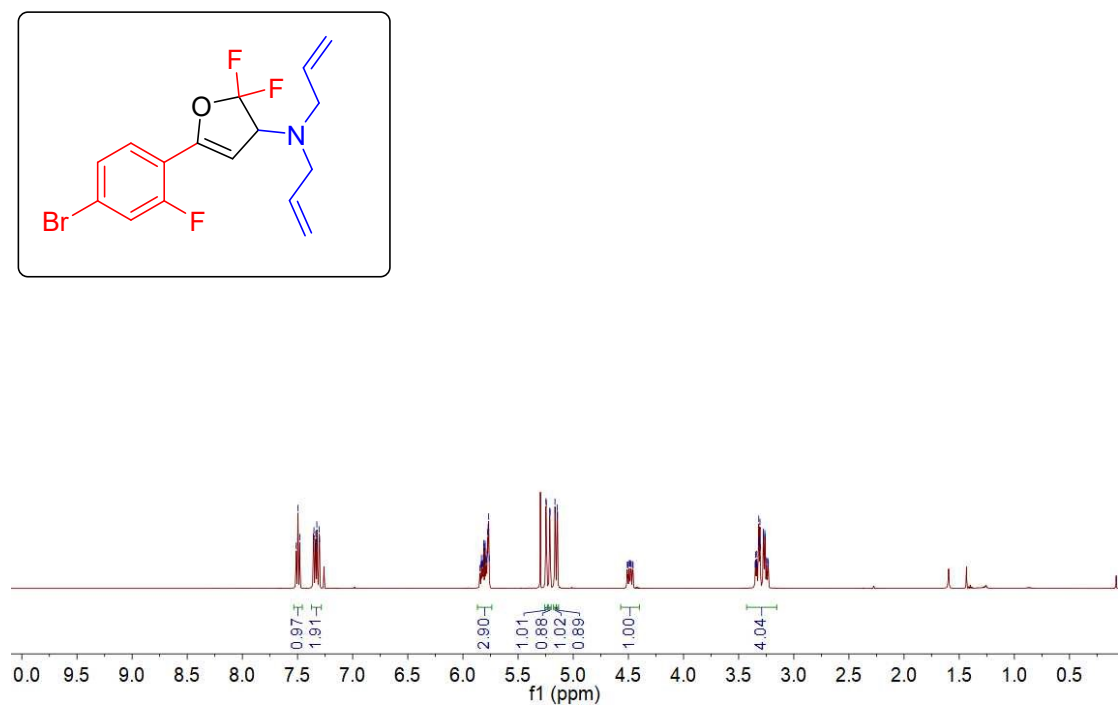

$^{13}\text{C}$  spectrum ( $\text{CDCl}_3$ ) **N,N**-diallyl-5-(4-bromo-2-fluorophenyl)-2,2-difluoro-2,3-dihydrofuran-3-amine (**5an**)

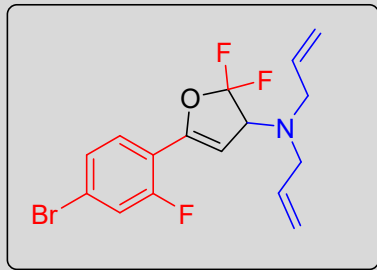

$^{19}\text{F}$  spectrum ( $\text{CDCl}_3$ ) N,N-diallyl-5-(4-bromo-2-fluorophenyl)-2,2-difluoro-2,3-dihydrofuran-3-amine (5an)

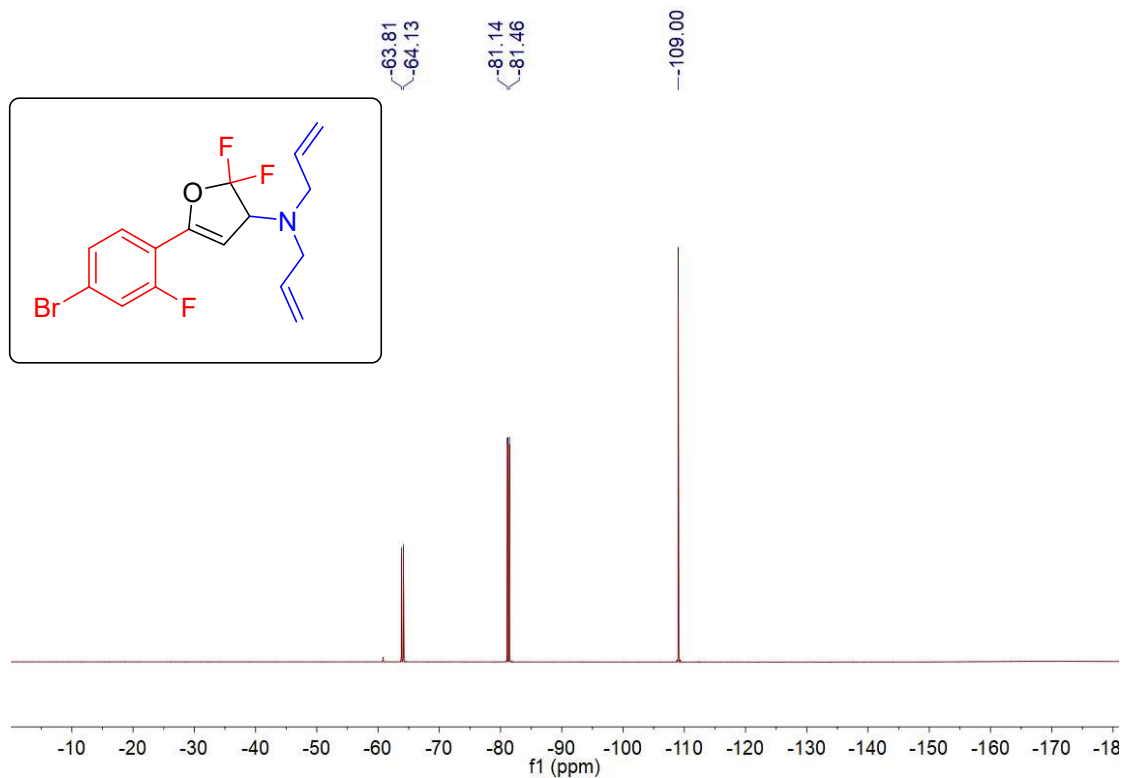

$^1\text{H}$  spectrum ( $\text{CDCl}_3$ ) N,N-diallyl-2,2-difluoro-5-(2-fluoro-4-methylphenyl)-2,3-dihydrofuran-3-amine (5ao)

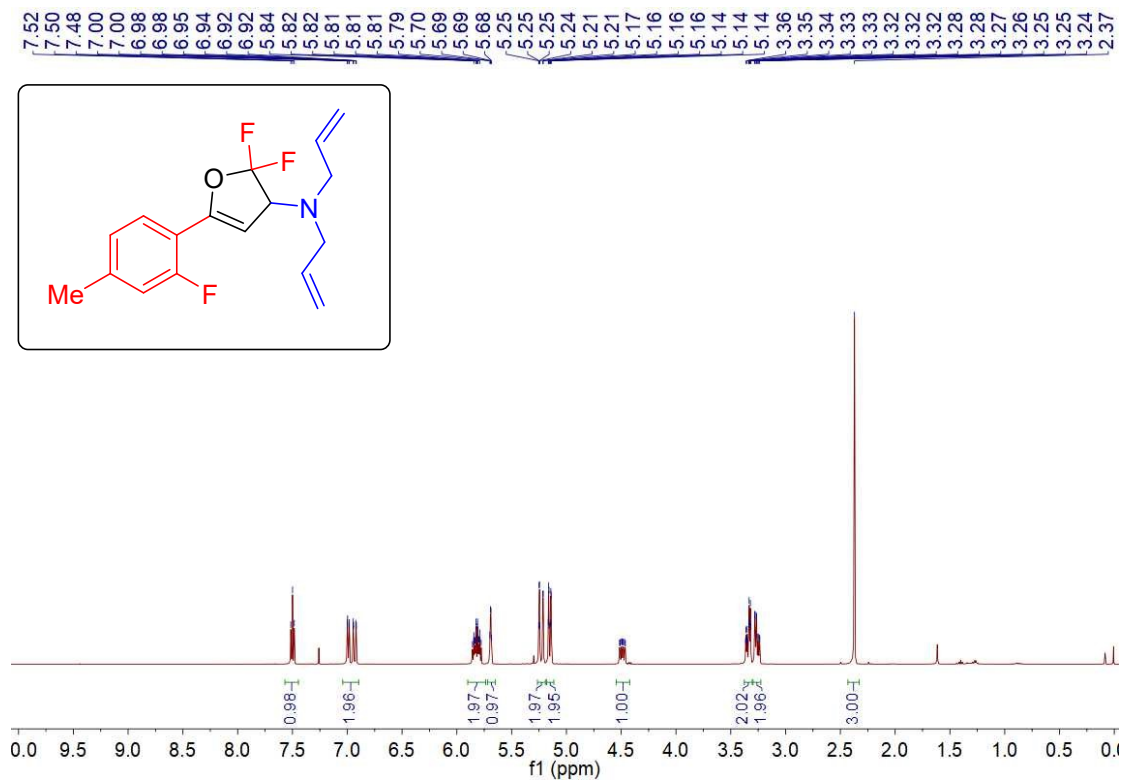

**<sup>13</sup>C spectrum (CDCl<sub>3</sub>) N,N-diallyl-2,2-difluoro-5-(2-fluoro-4-methylphenyl)-2,3-dihydrofuran-3-amine (5ao)**

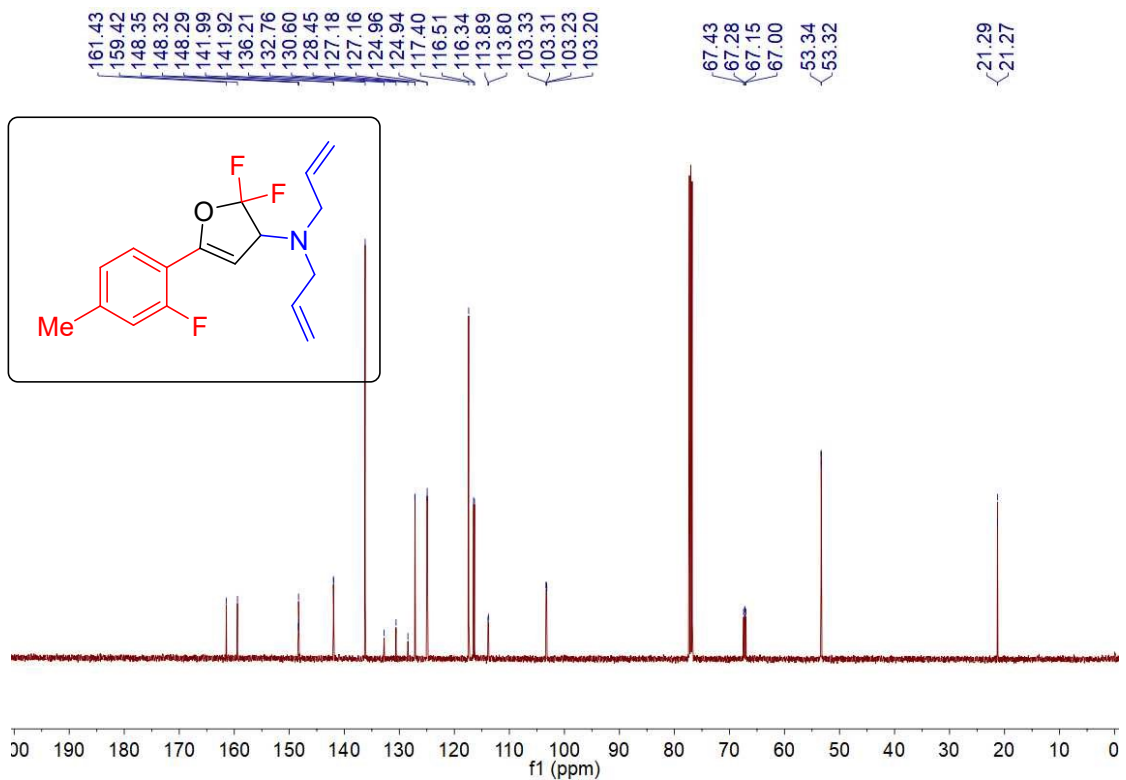

**<sup>19</sup>F spectrum (CDCl<sub>3</sub>) N,N-diallyl-2,2-difluoro-5-(2-fluoro-4-methylphenyl)-2,3-dihydrofuran-3-amine (5ao)**

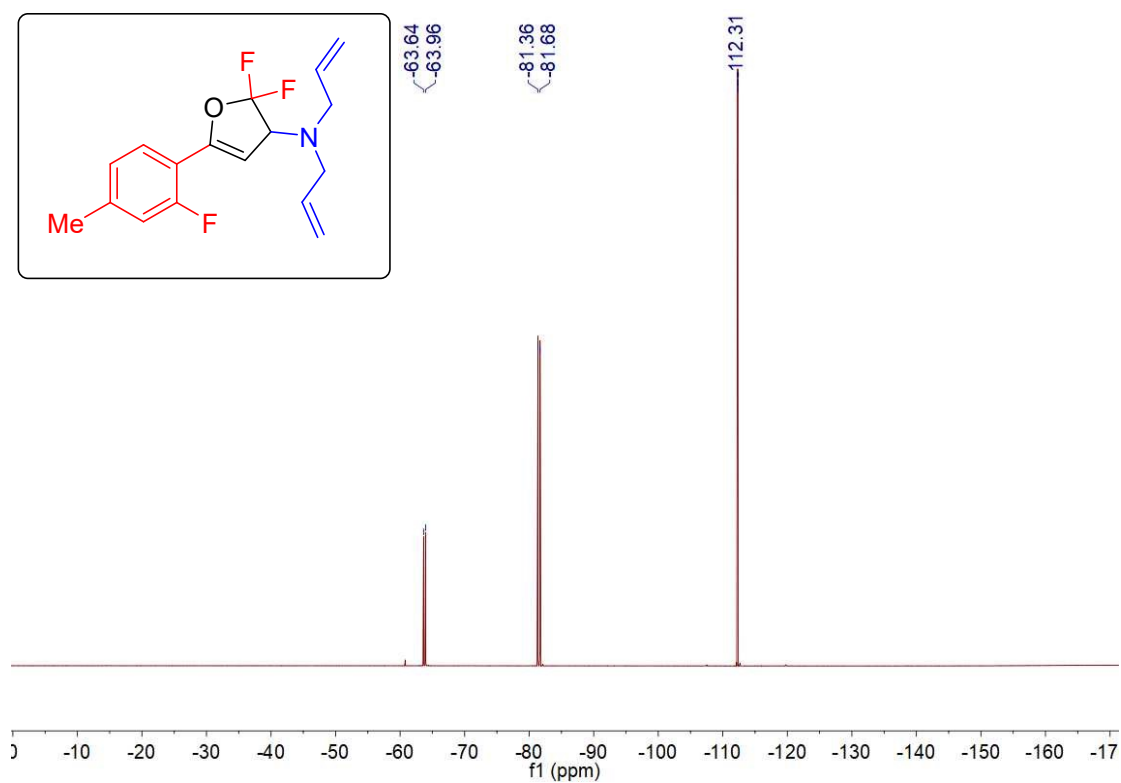

**<sup>1</sup>H spectrum (CDCl<sub>3</sub>) N,N-diallyl-2,2-difluoro-5-(3-fluoro-4-methoxyphenyl)-2,3-dihydrofuran-3-amine (5ap)**

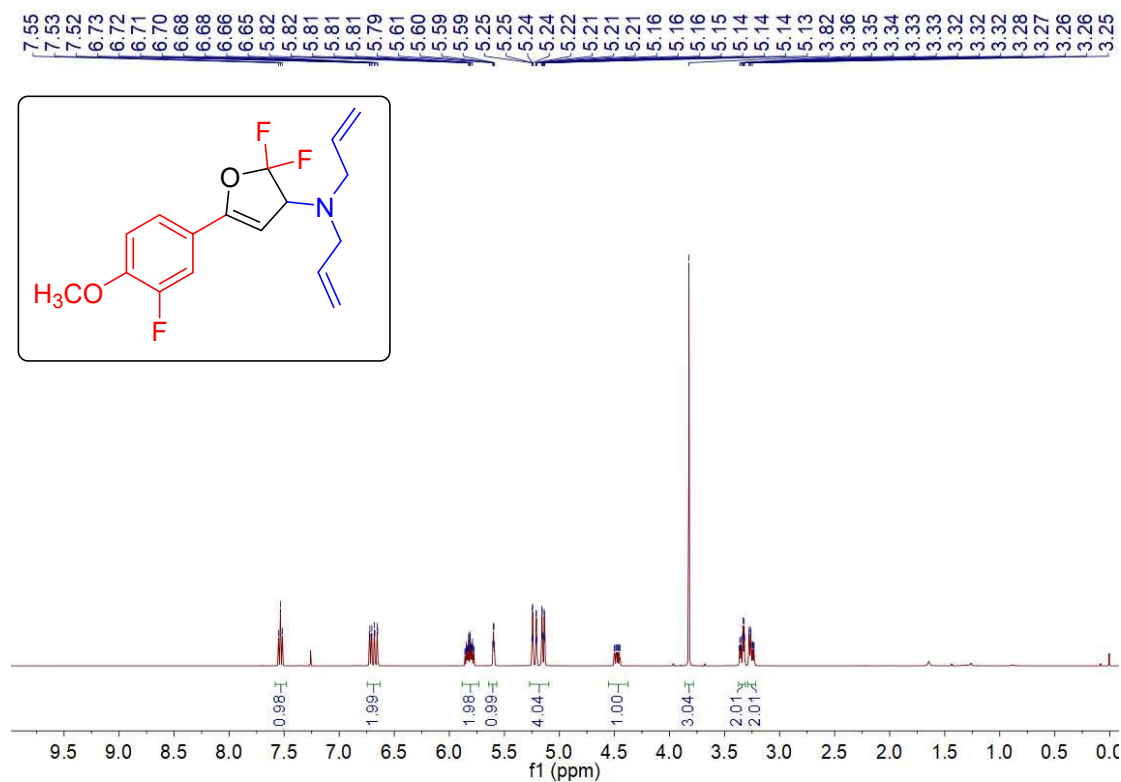

**<sup>13</sup>C spectrum (CDCl<sub>3</sub>) N,N-diallyl-2,2-difluoro-5-(3-fluoro-4-methoxyphenyl)-2,3-dihydrofuran-3-amine (5ap)**



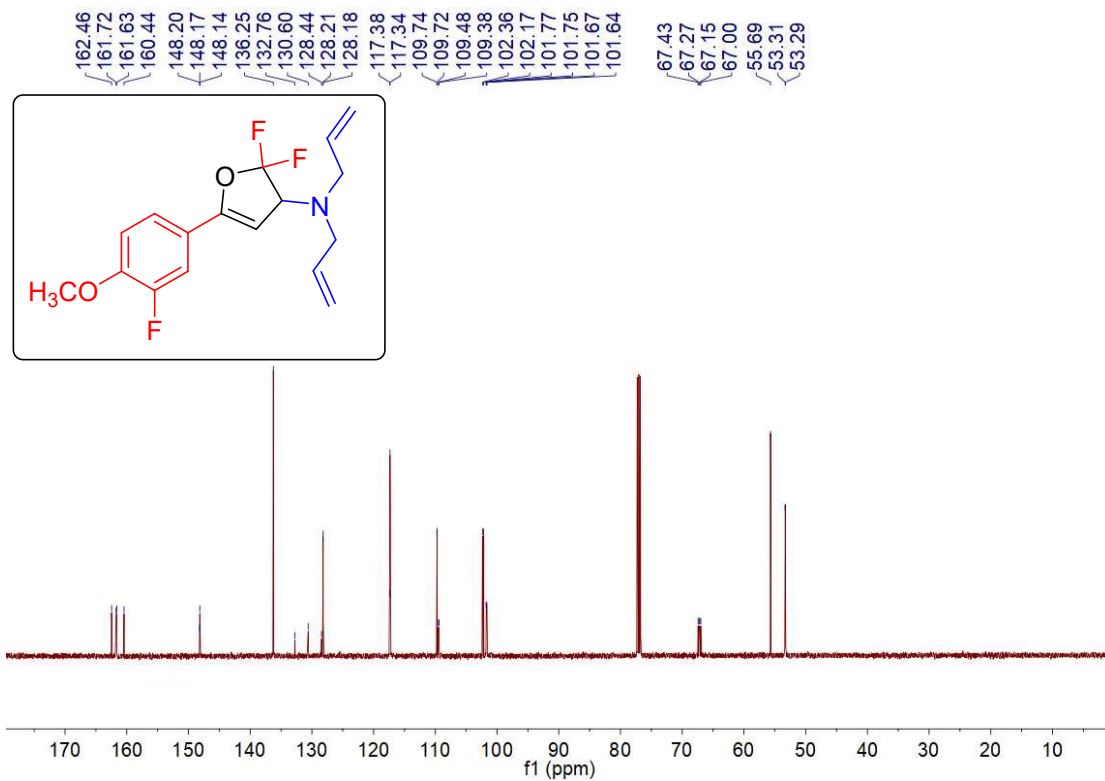

$^{19}\text{F}$  spectrum ( $\text{CDCl}_3$ ) N,N-diallyl-2,2-difluoro-5-(3-fluoro-4-methoxyphenyl)-2,3-dihydrofuran-3-amine (**5a**)

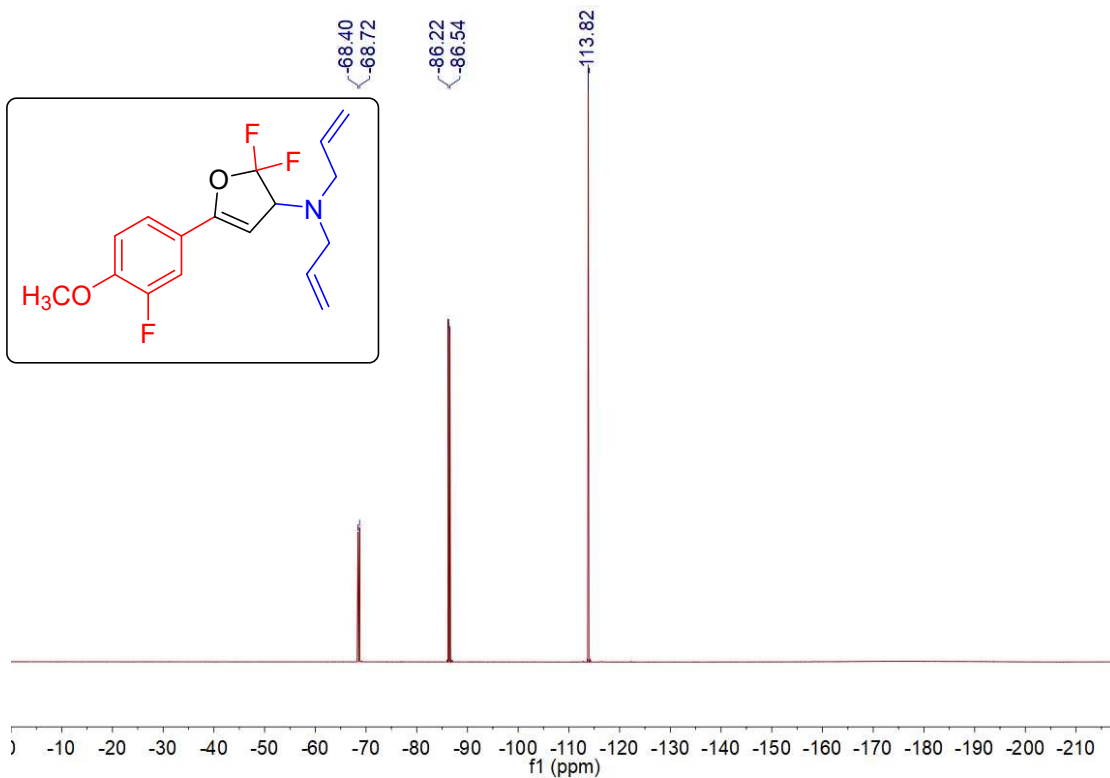

**<sup>1</sup>H spectrum (CDCl<sub>3</sub>) N,N-dibenzyl-2,2-difluoro-5-phenethyl-2,3-dihydrofuran-3-amine(5aq)**

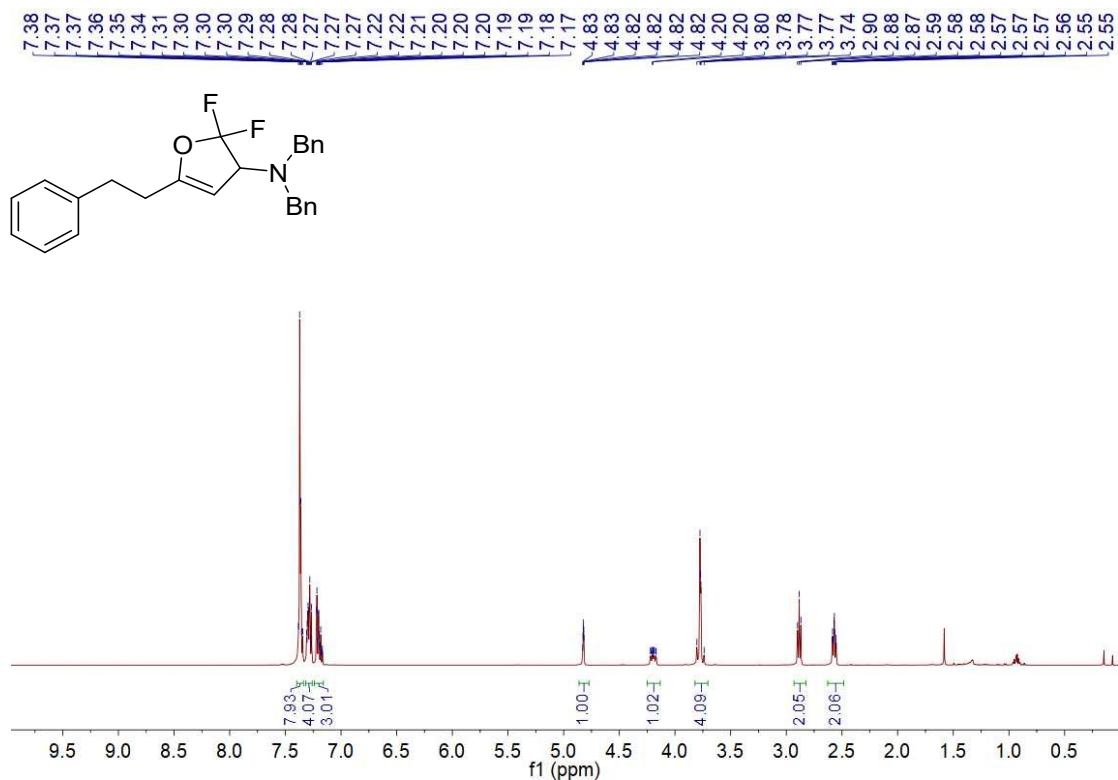

**<sup>13</sup>C spectrum (CDCl<sub>3</sub>) N,N-dibenzyl-2,2-difluoro-5-phenethyl-2,3-dihydrofuran-3-amine(5aq)**

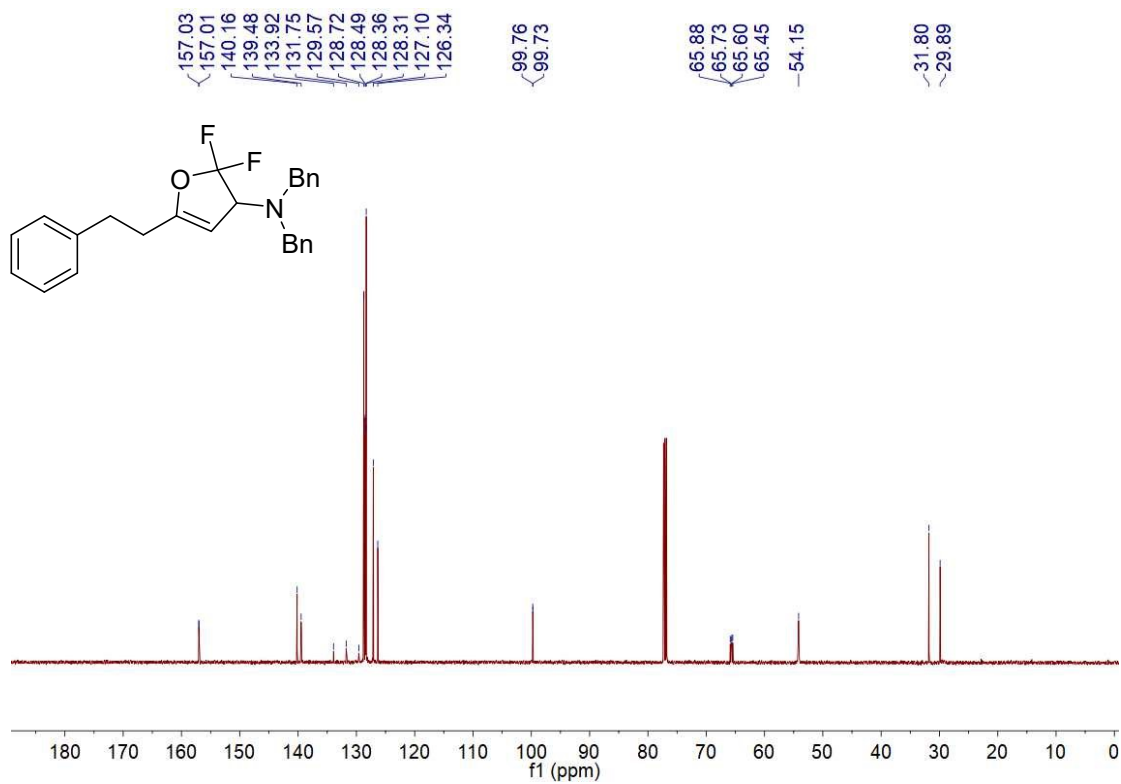

**<sup>19</sup>F spectrum (CDCl<sub>3</sub>) N,N-dibenzyl-2,2-difluoro-5-phenethyl-2,3-dihydrofuran-3-amine(5a)**

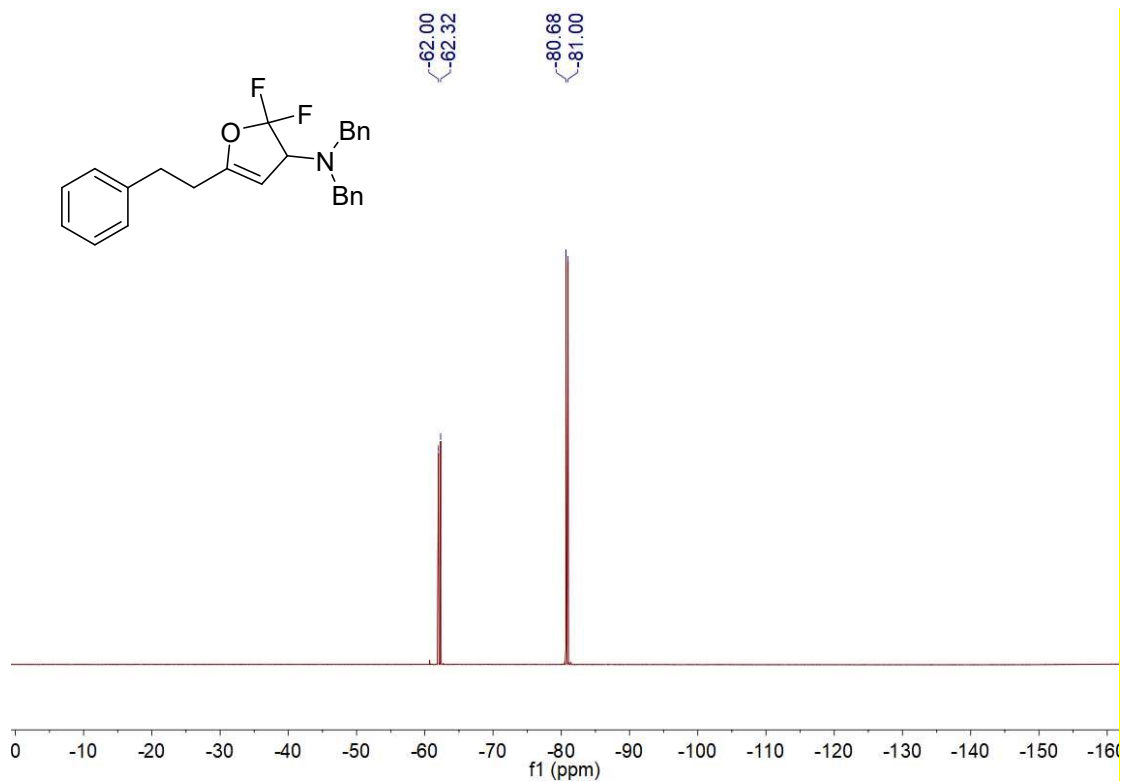

**<sup>1</sup>H spectrum (CDCl<sub>3</sub>) methyl 4-phenyl-2-(piperidin-1-yl)butanoate (6a)**

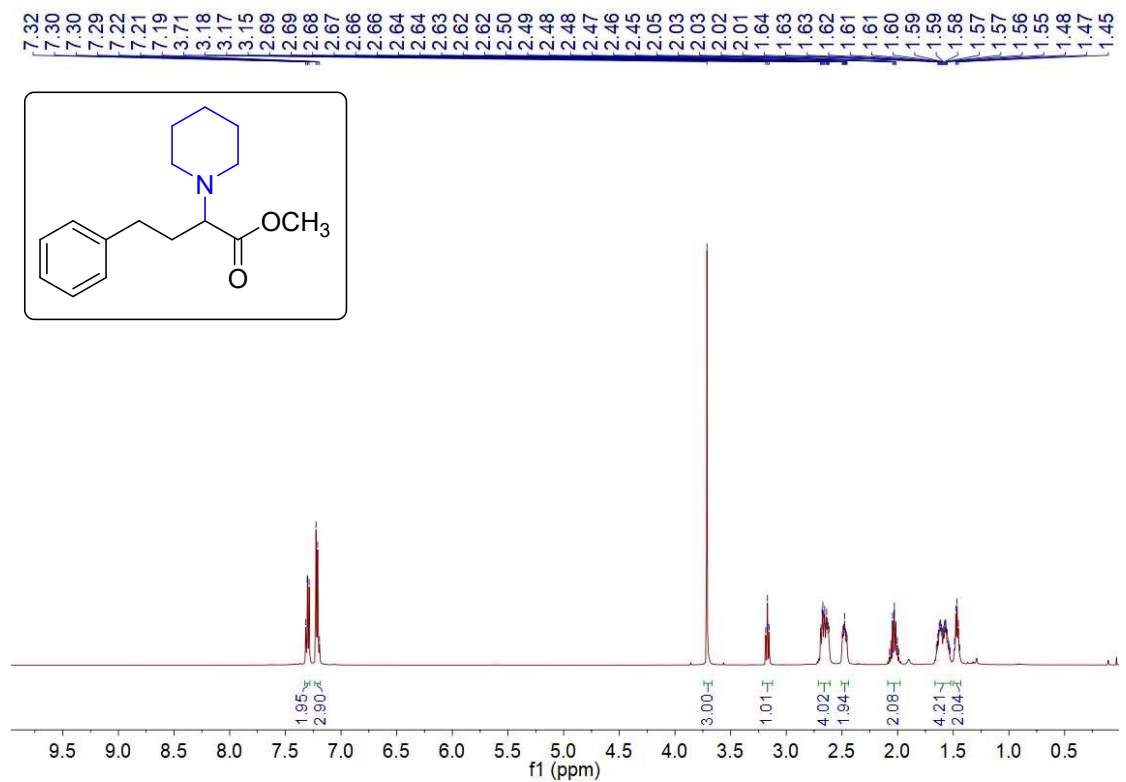

**<sup>13</sup>C spectrum (CDCl<sub>3</sub>) methyl 4-phenyl-2-(piperidin-1-yl)butanoate (6a)**

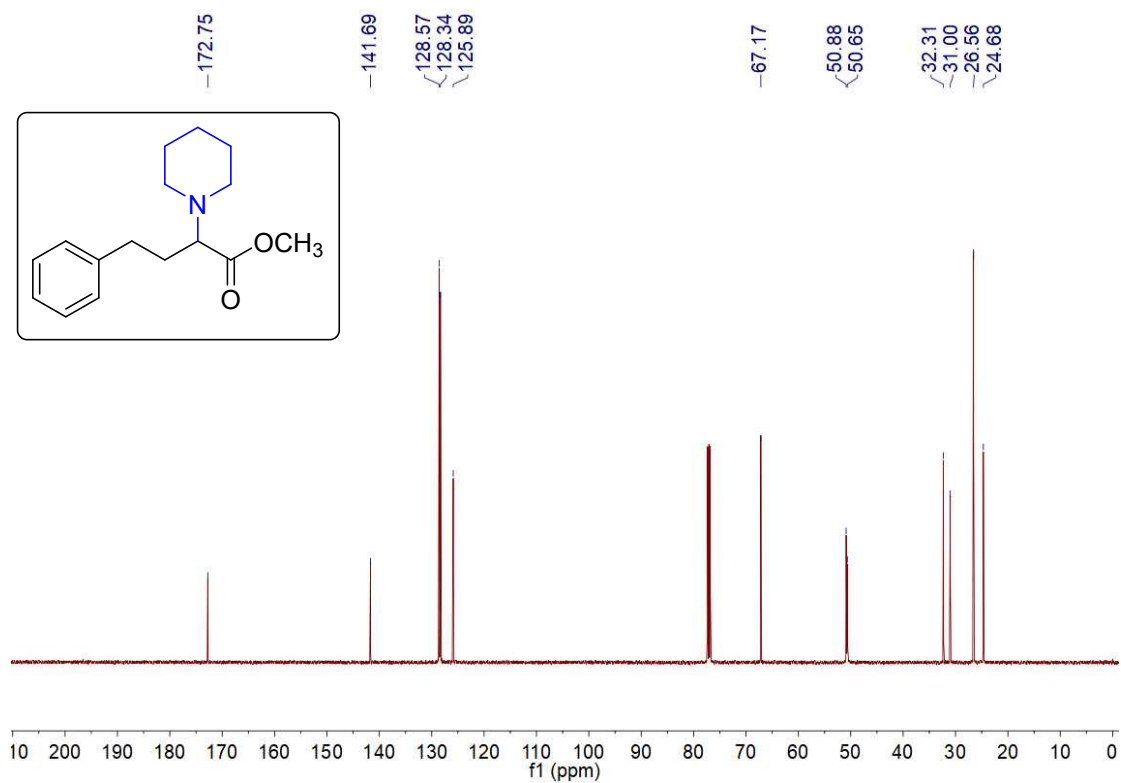

**<sup>1</sup>H spectrum (CDCl<sub>3</sub>) methyl 2-morpholino-4-phenylbutanoate (6b)**

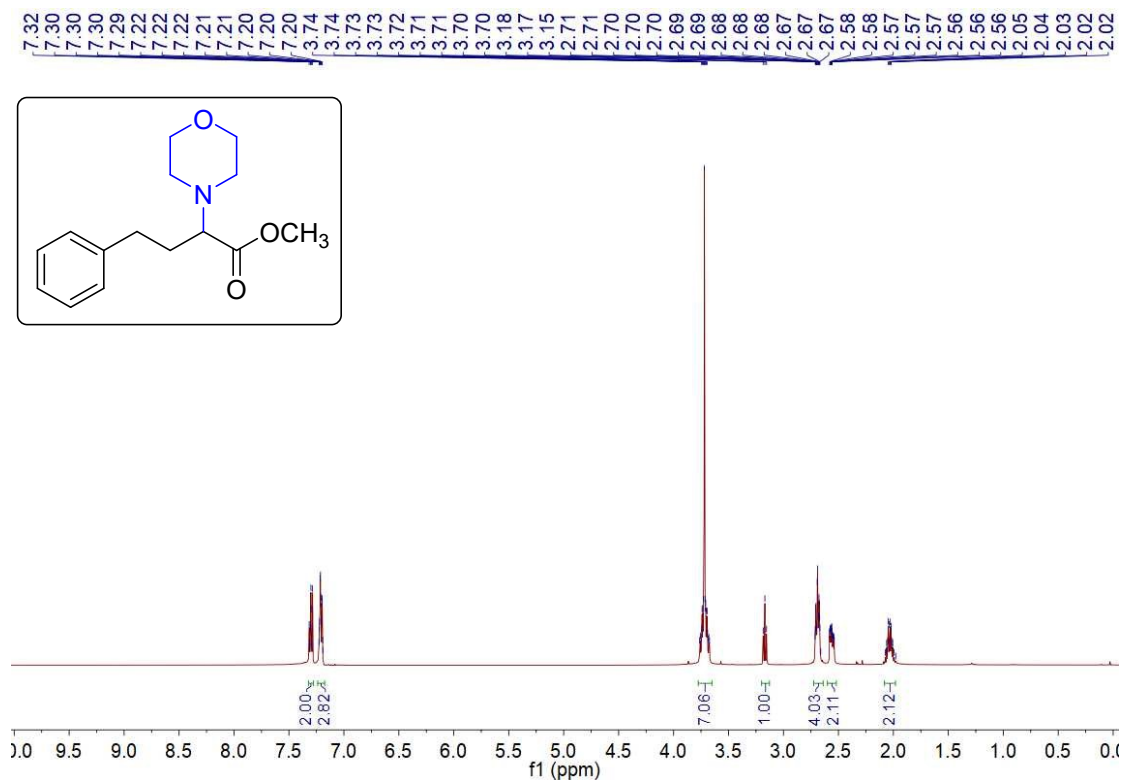

**<sup>13</sup>C spectrum (CDCl<sub>3</sub>) methyl 2-morpholino-4-phenylbutanoate (6b)**

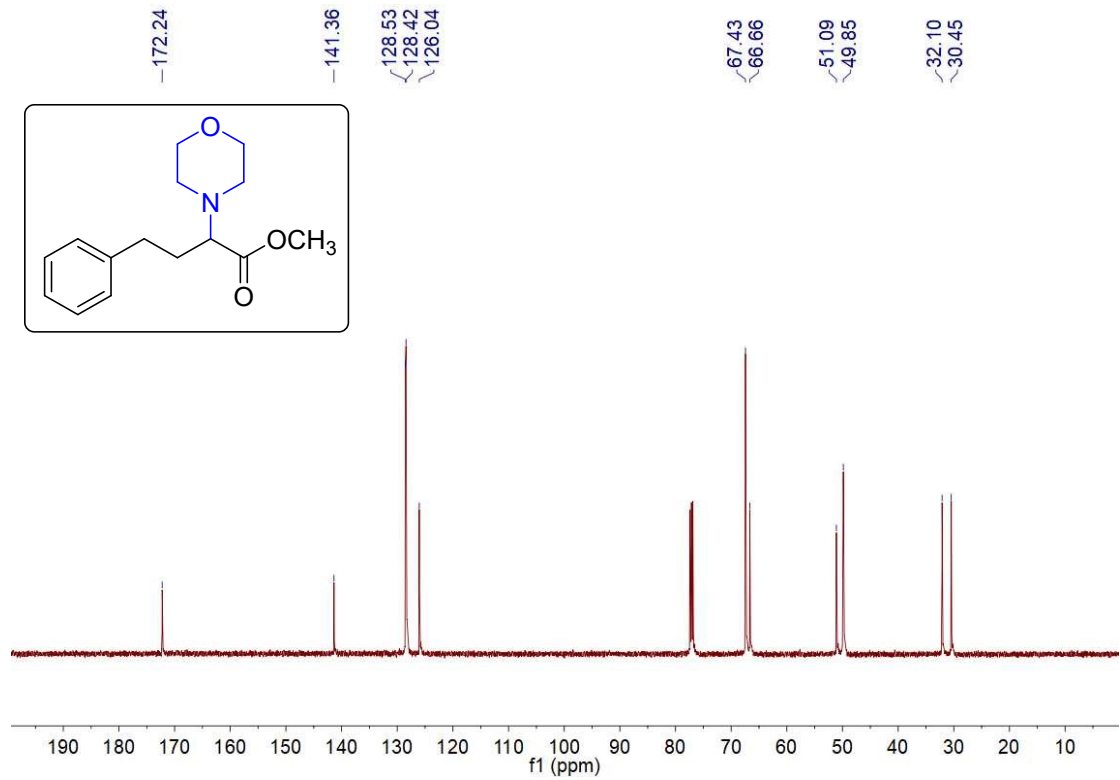

<sup>1</sup>H spectrum (CDCl<sub>3</sub>) methyl 4-phenyl-2-(1,4-dioxo-8-azaspiro[4.5]decan-8-yl)butanoate (6c)

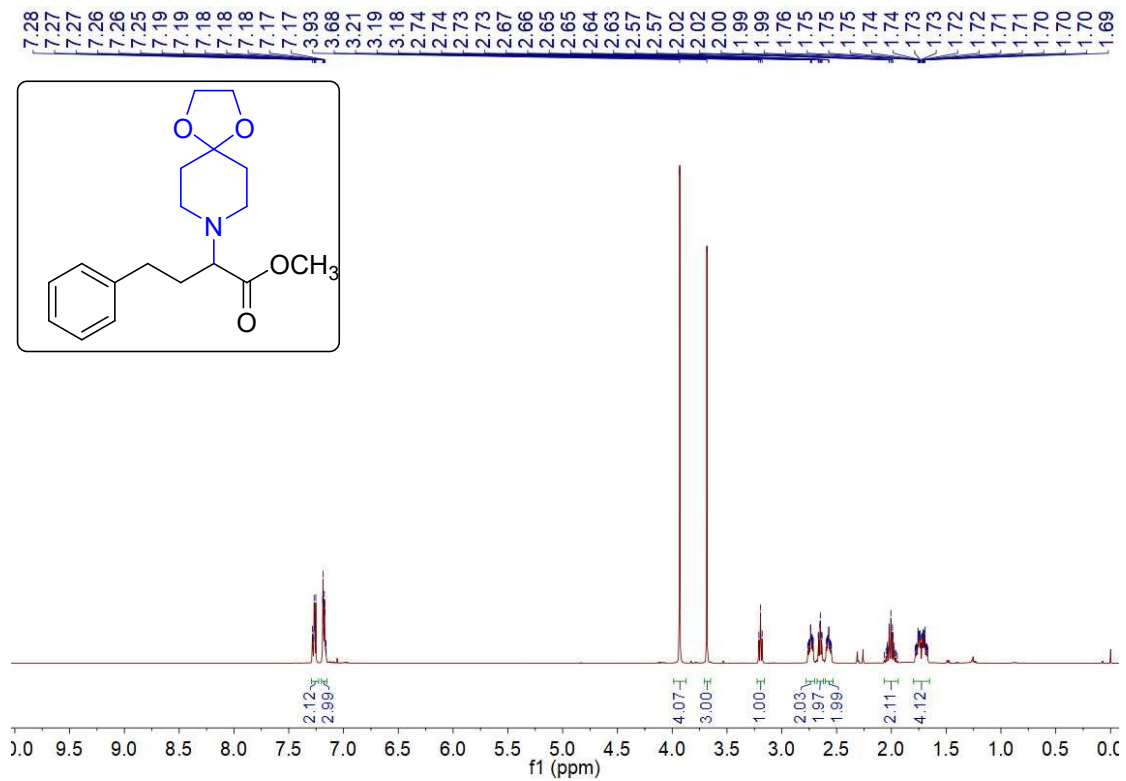

<sup>13</sup>C spectrum (CDCl<sub>3</sub>) methyl 4-phenyl-2-(1,4-dioxo-8-azaspiro[4.5]decan-8-yl)butanoate (6c)

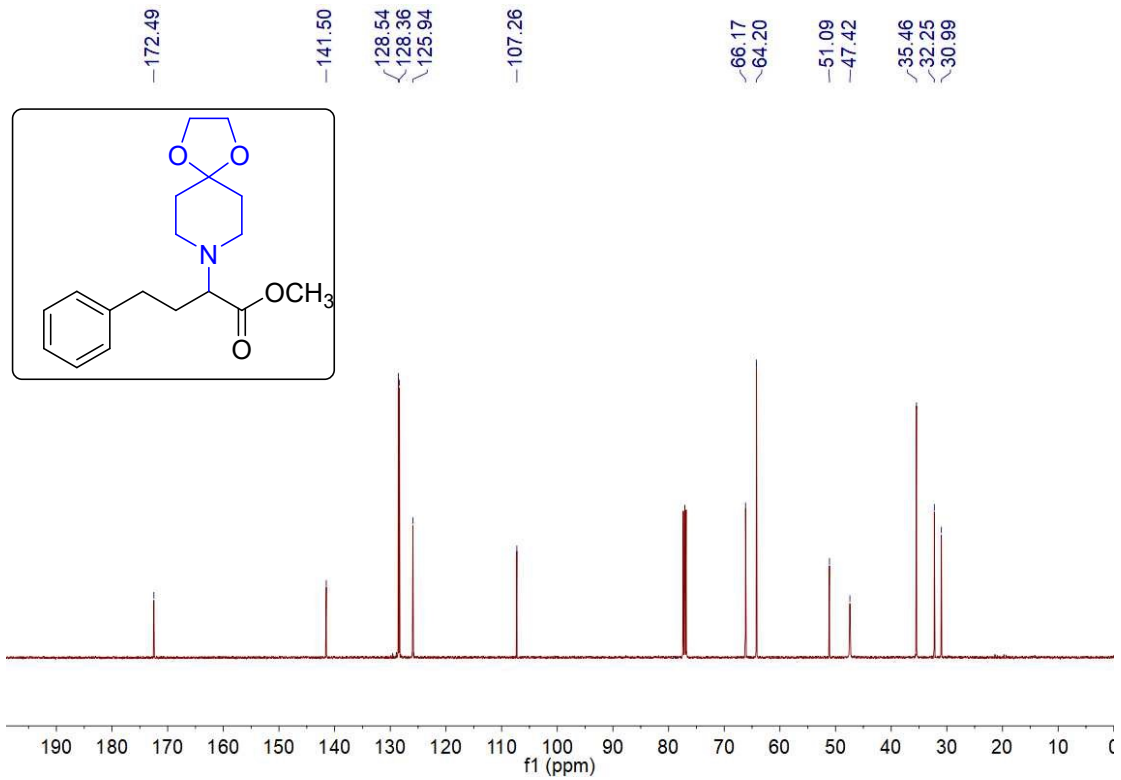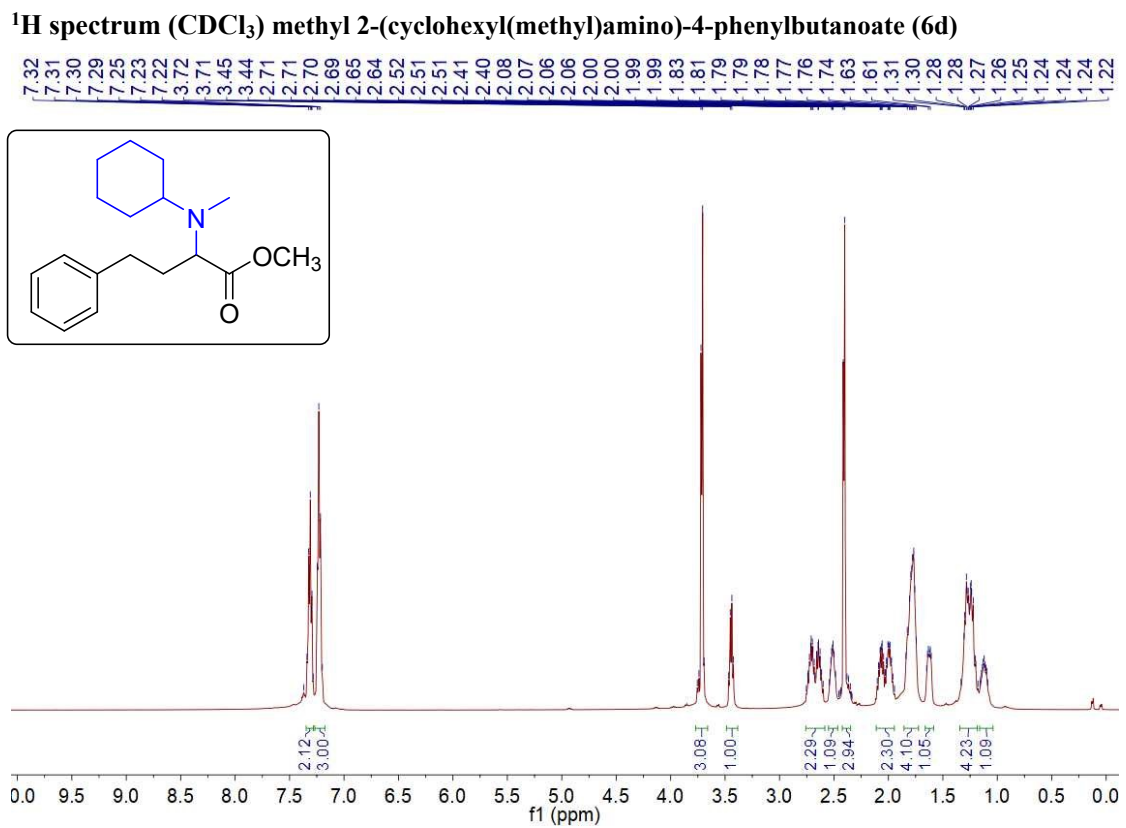

**<sup>13</sup>C spectrum (CDCl<sub>3</sub>) methyl 2-(cyclohexyl(methyl)amino)-4-phenylbutanoate (6d)**

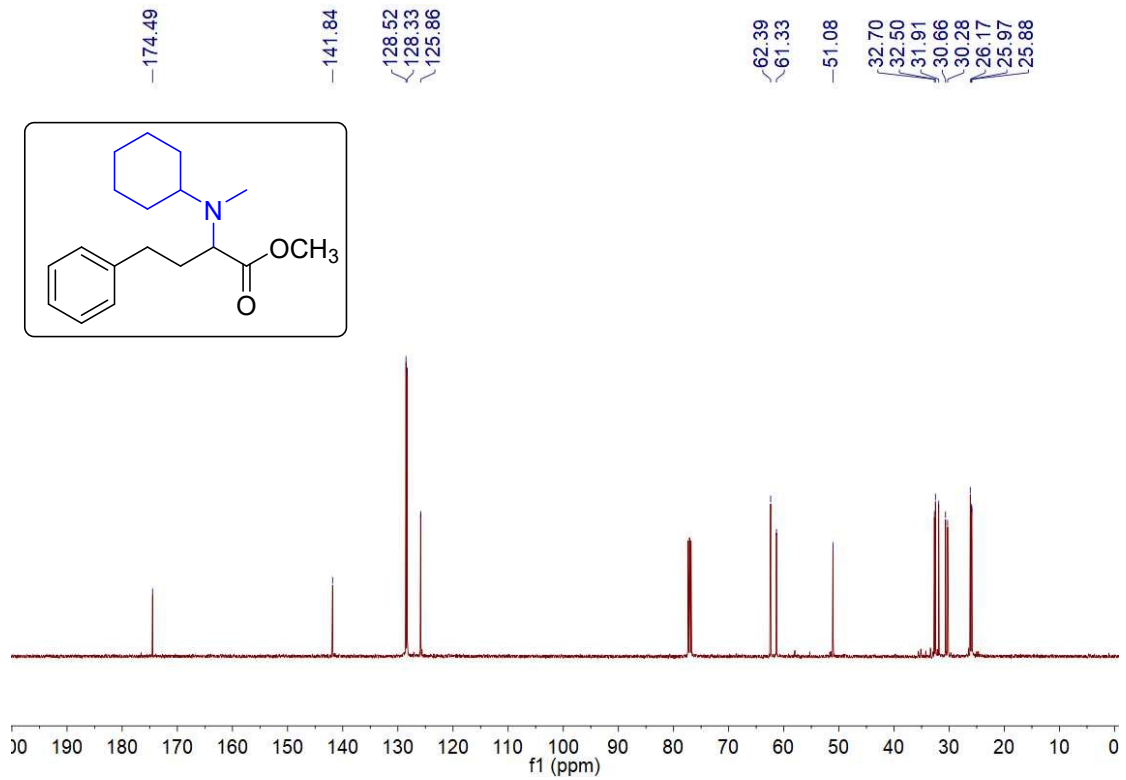

**<sup>1</sup>H spectrum (CDCl<sub>3</sub>) methyl 2-((2,2-dimethoxyethyl)(methyl)amino)-4-phenylbutanoate (6e)**

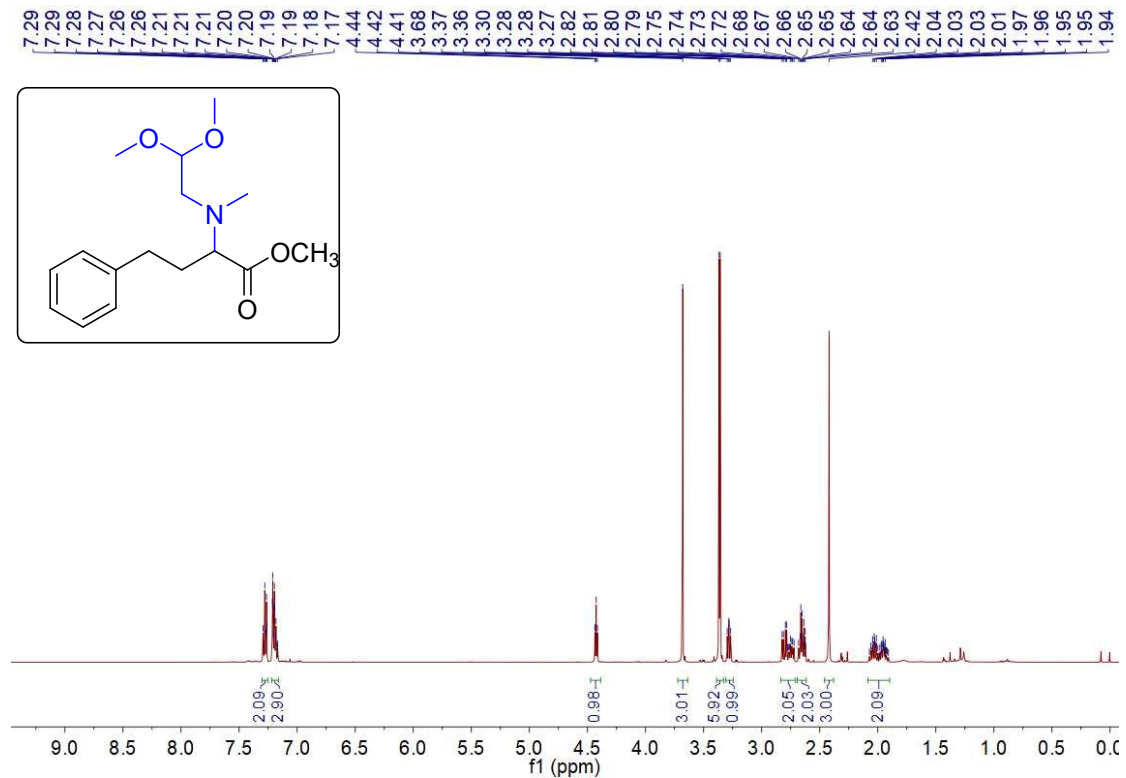

**<sup>13</sup>C spectrum (CDCl<sub>3</sub>) methyl 2-((2,2-dimethoxyethyl)(methyl)amino)-4-phenylbutanoate (6e)**

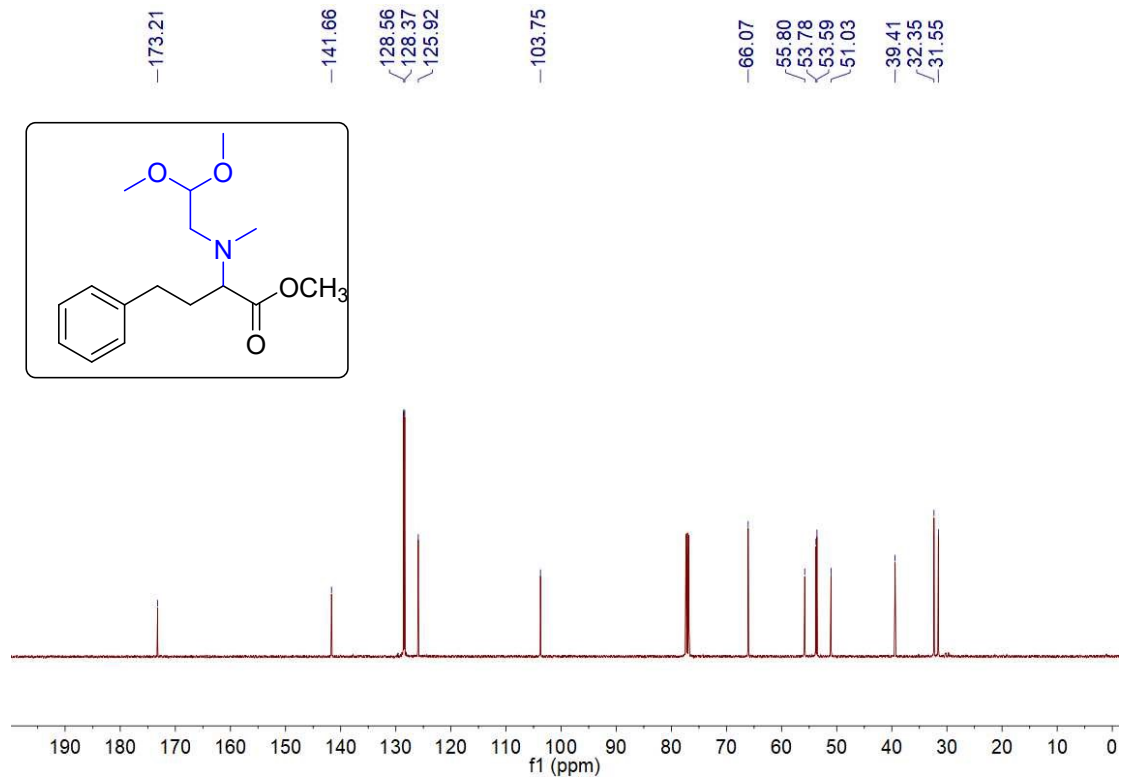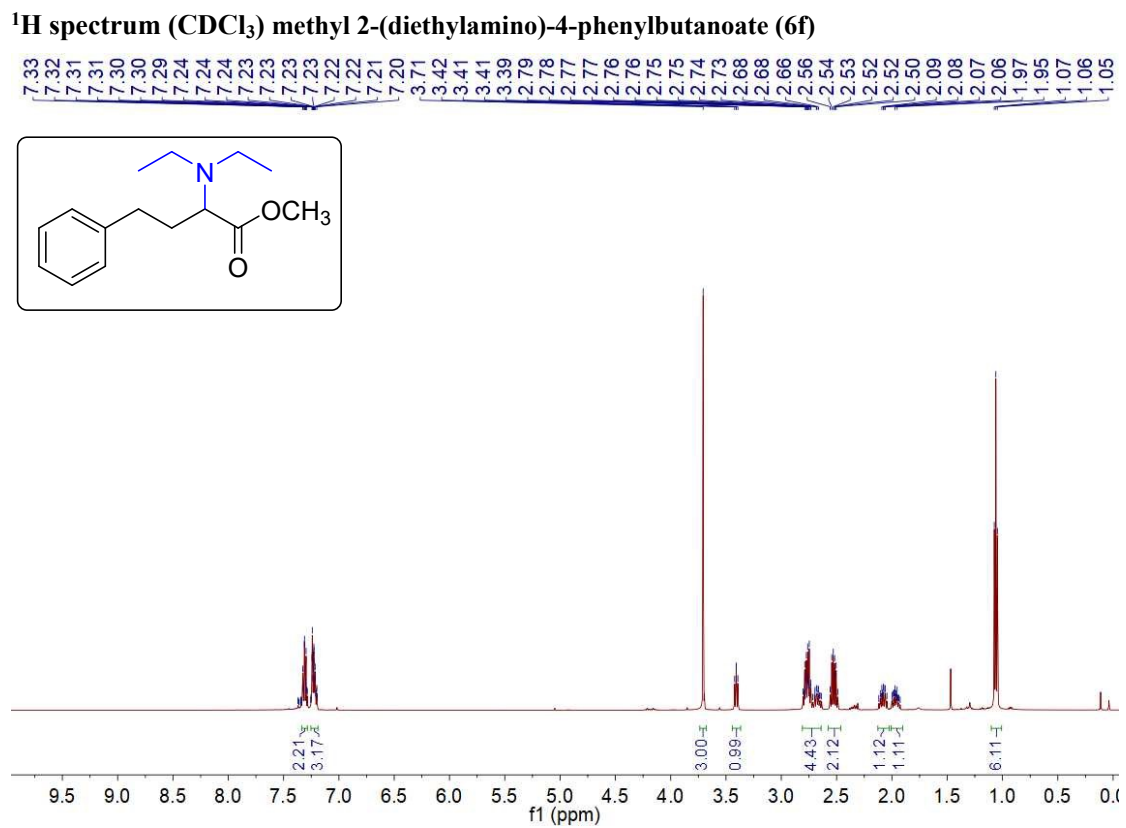

**<sup>13</sup>C spectrum (CDCl<sub>3</sub>) methyl 2-(diethylamino)-4-phenylbutanoate (6f)**



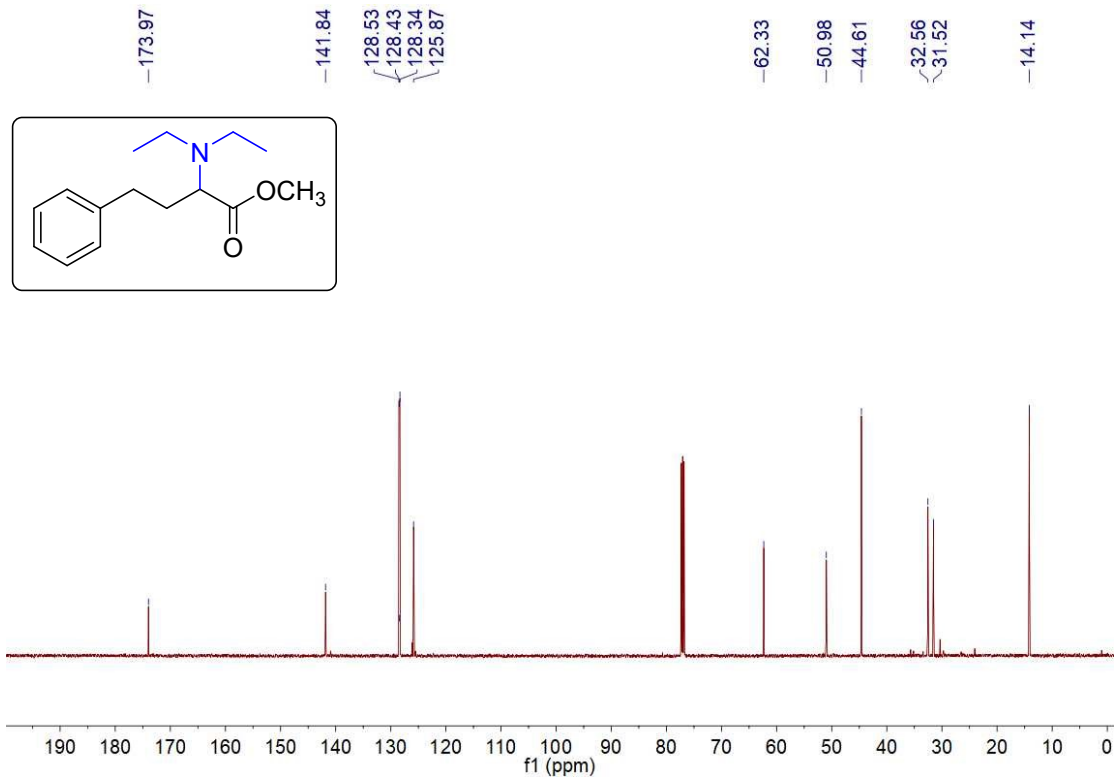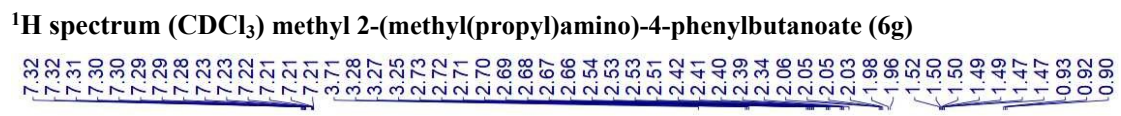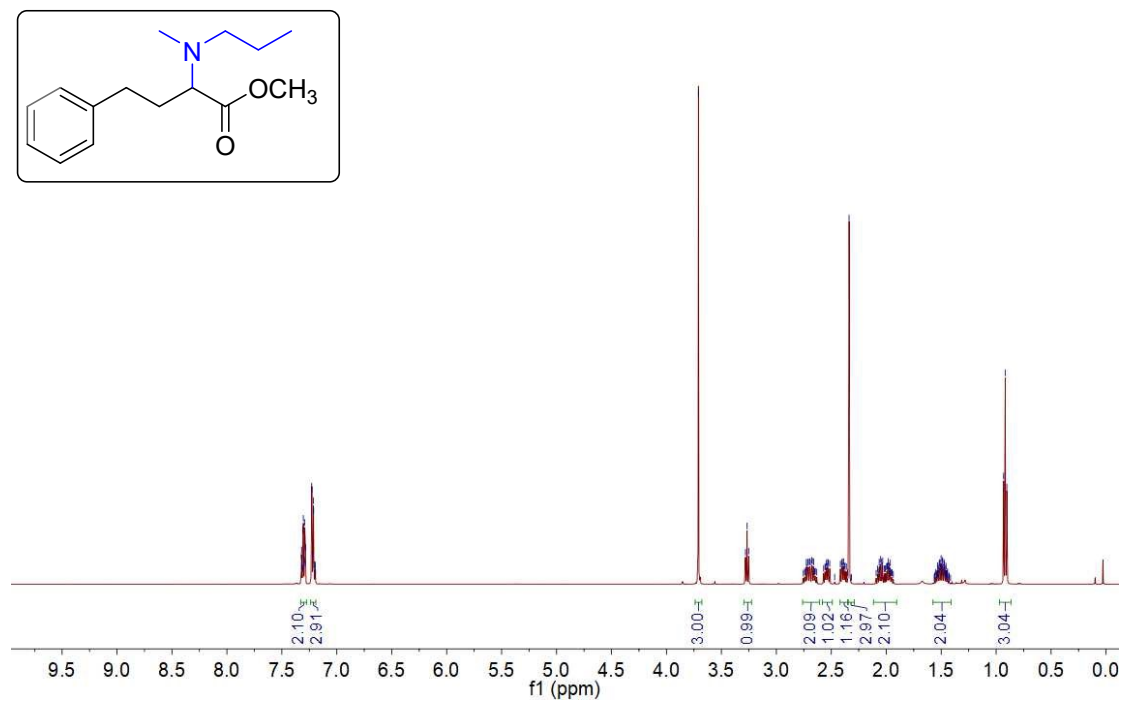

**<sup>13</sup>C spectrum (CDCl<sub>3</sub>) methyl 2-(methylpropylamino)-4-phenylbutanoate (6g)**

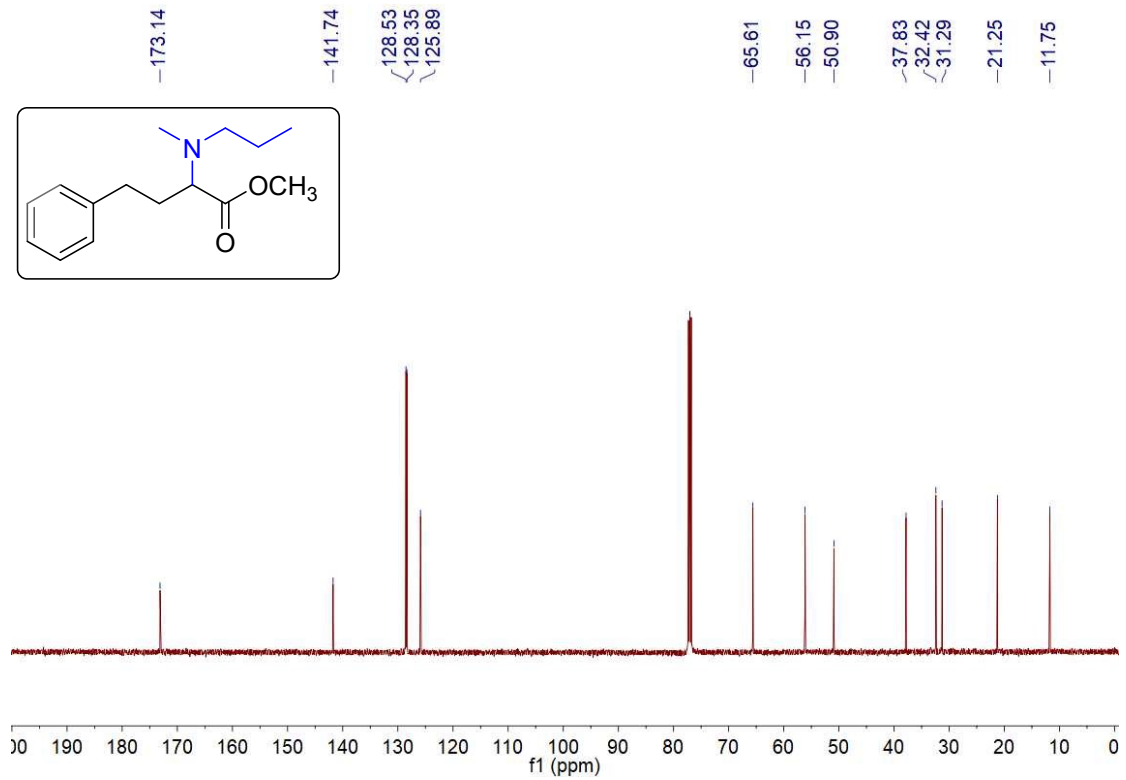

<sup>1</sup>H spectrum (CDCl<sub>3</sub>) methyl 2-(dipropylamino)-4-phenylbutanoate (6h)

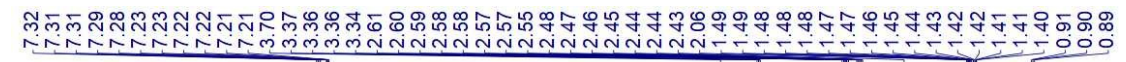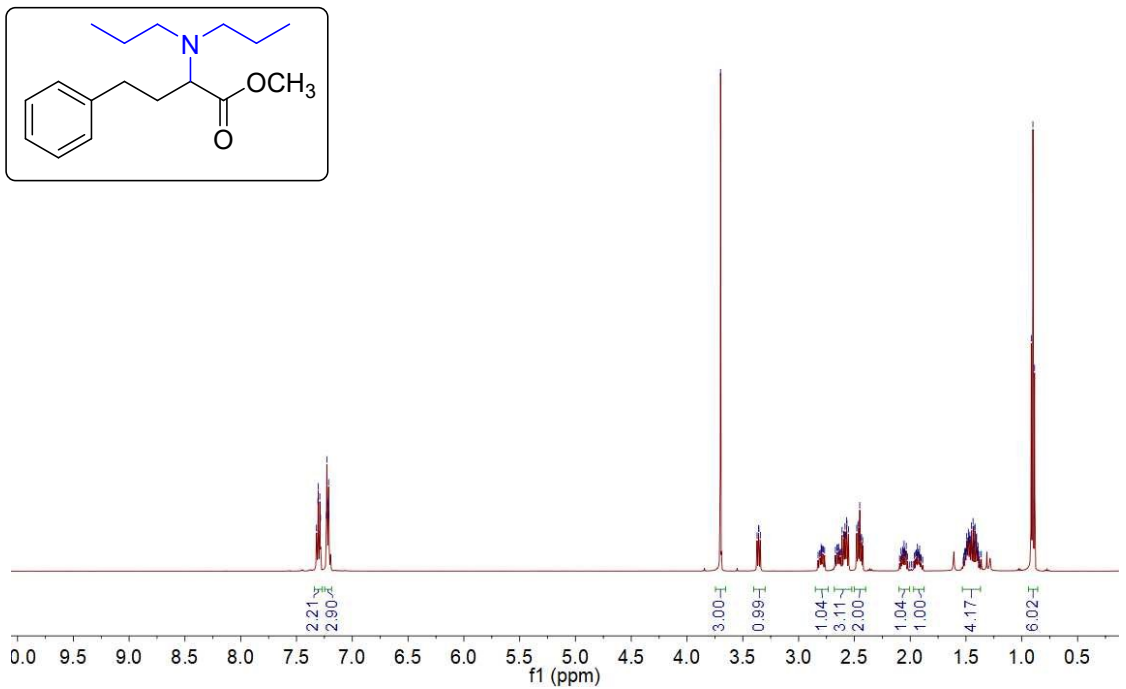

<sup>13</sup>C spectrum (CDCl<sub>3</sub>) methyl 2-(dipropylamino)-4-phenylbutanoate (6h)

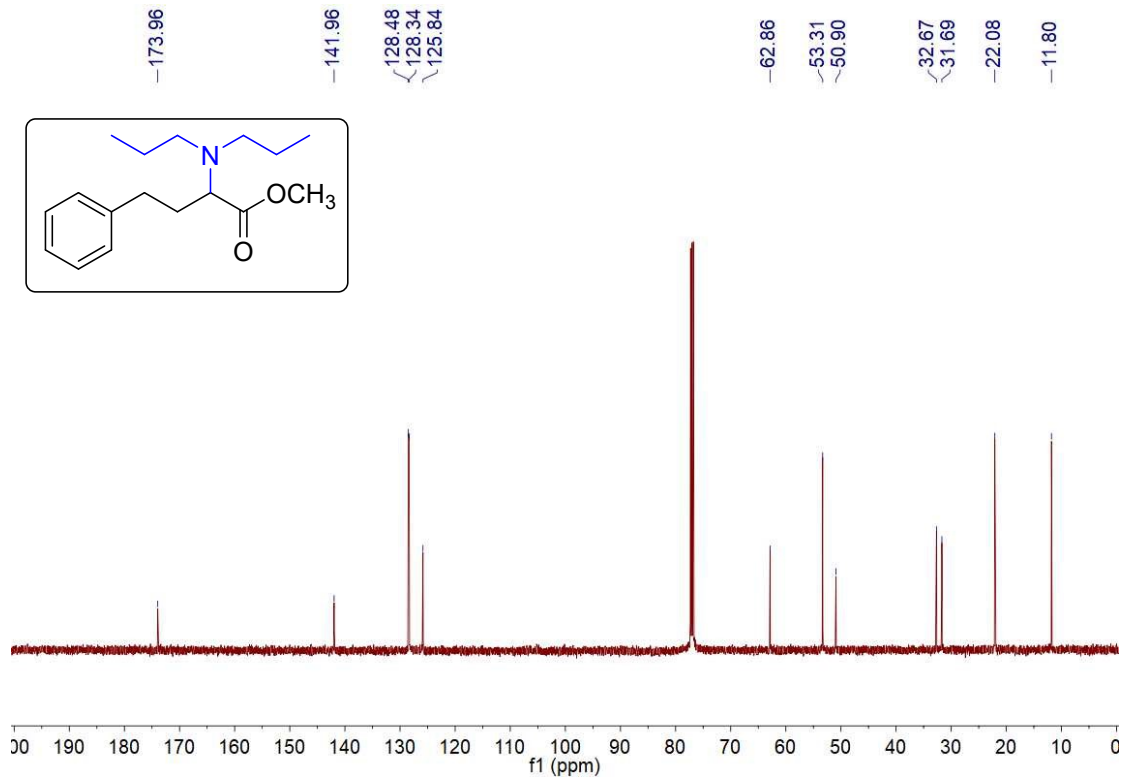

**<sup>1</sup>H spectrum (CDCl<sub>3</sub>) methyl 2-(butyl(phenyl)amino)-4-phenylbutanoate (6i)**

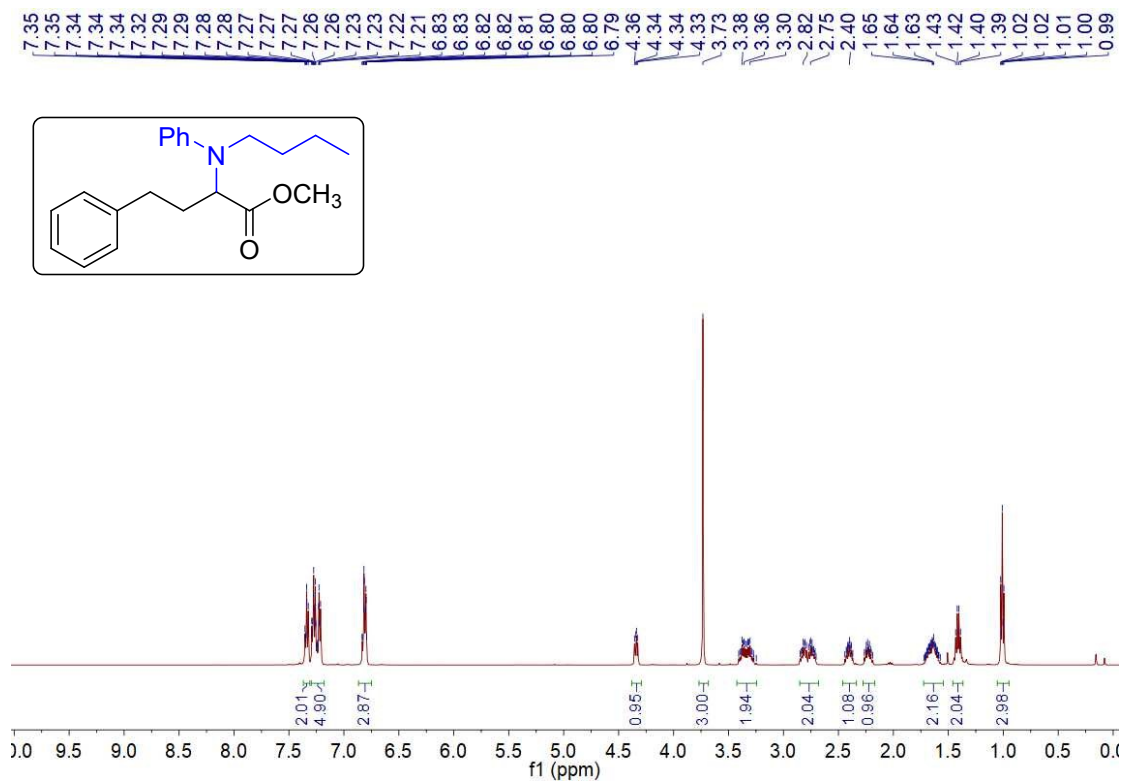

**<sup>13</sup>C spectrum (CDCl<sub>3</sub>) methyl 2-(butyl(phenyl)amino)-4-phenylbutanoate (6i)**

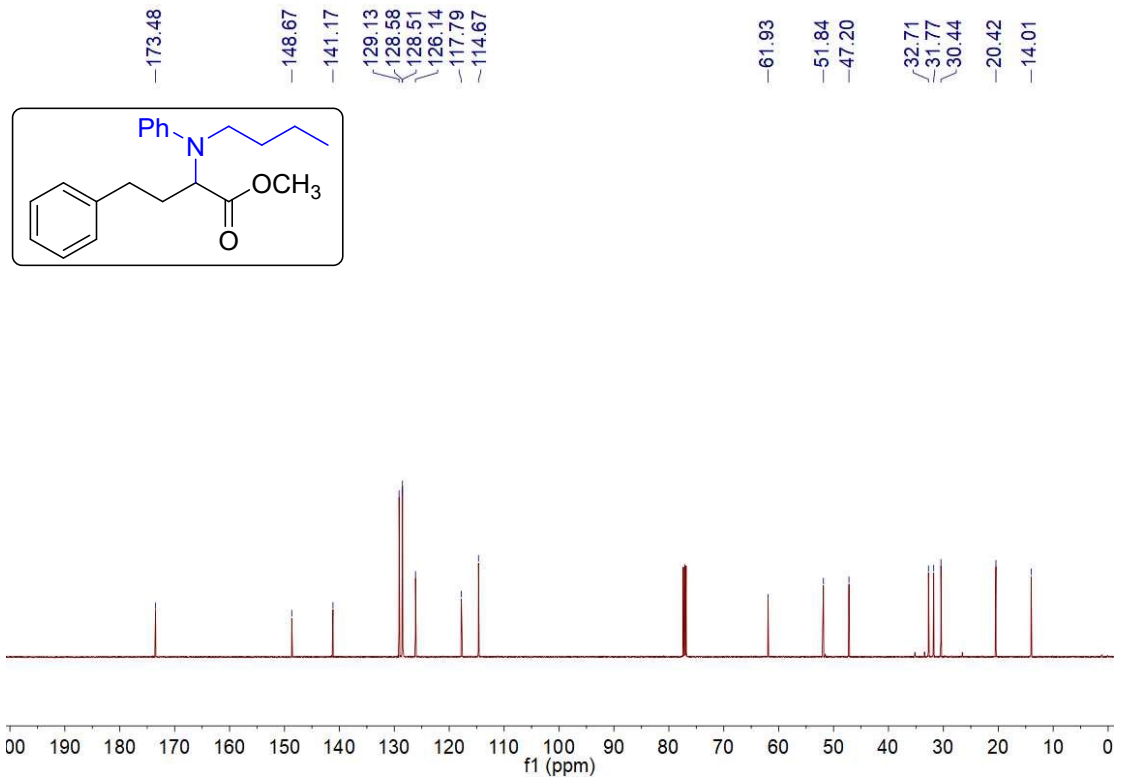

<sup>1</sup>H spectrum (CDCl<sub>3</sub>) methyl 2-(ethyl(phenyl)amino)-4-phenylbutanoate (6j)

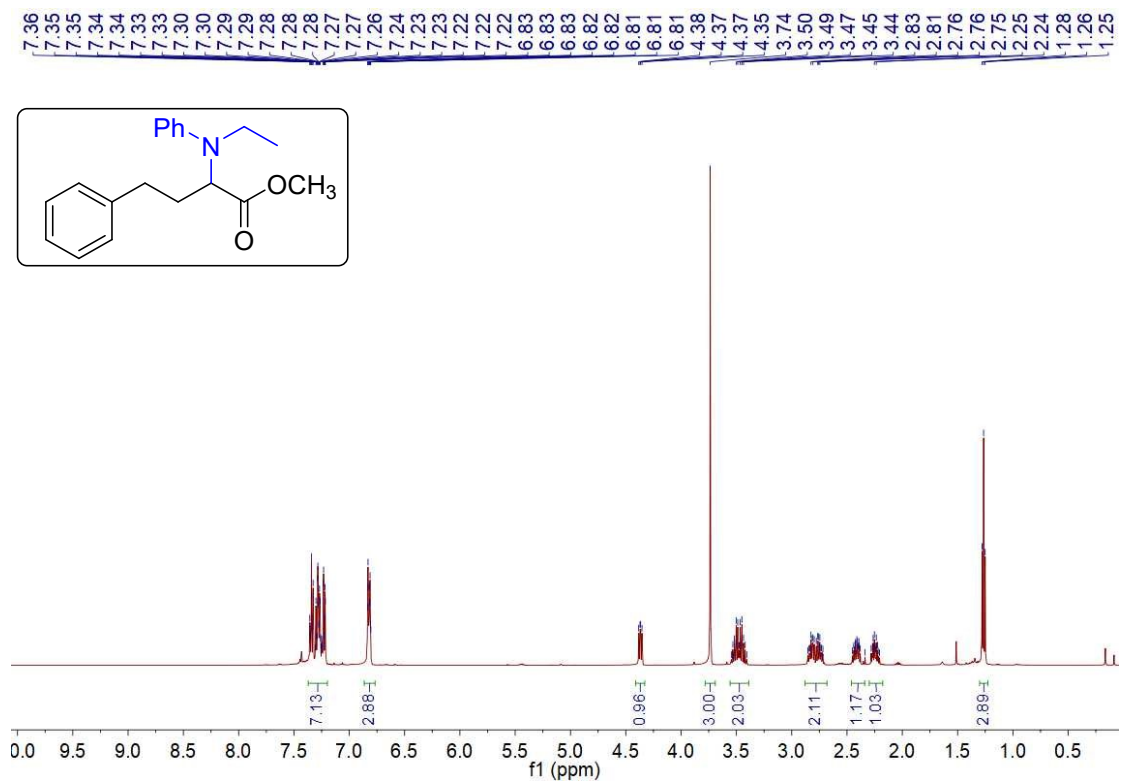

<sup>13</sup>C spectrum (CDCl<sub>3</sub>) methyl 2-(ethyl(phenyl)amino)-4-phenylbutanoate (6j)

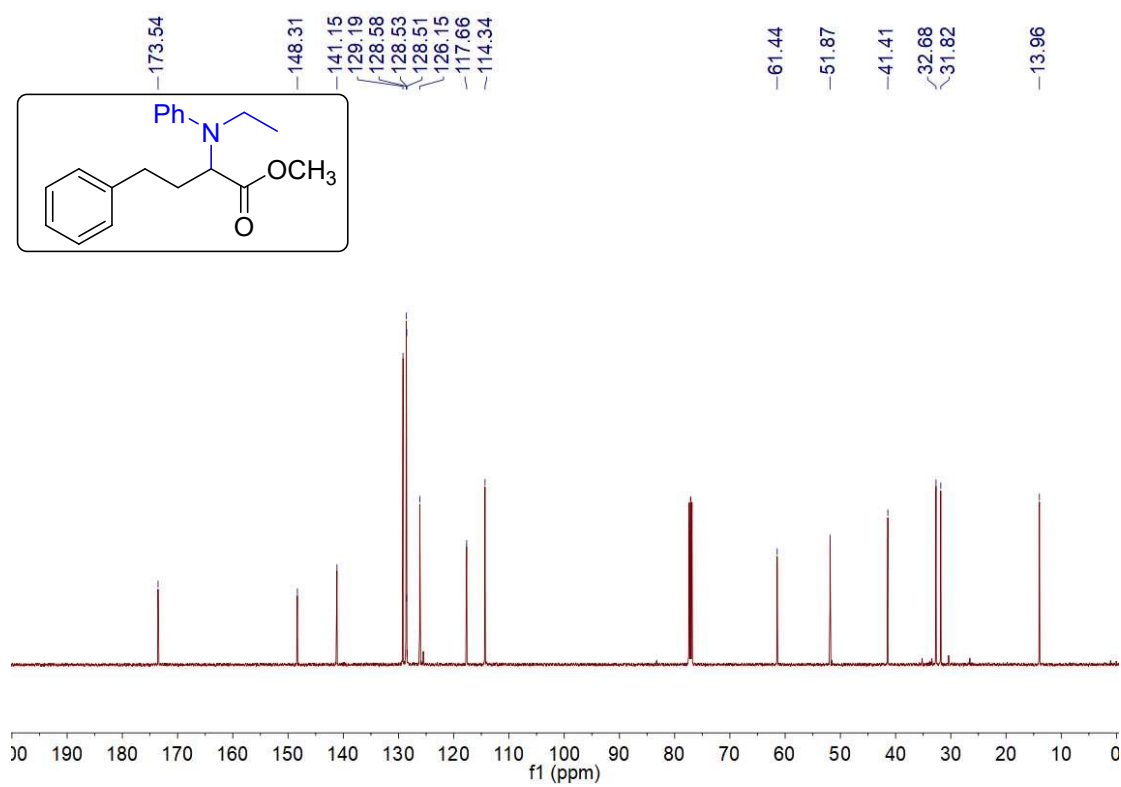

<sup>1</sup>H spectrum (CDCl<sub>3</sub>) methyl 2-(diisopropylamino)-4-phenylbutanoate (6k)

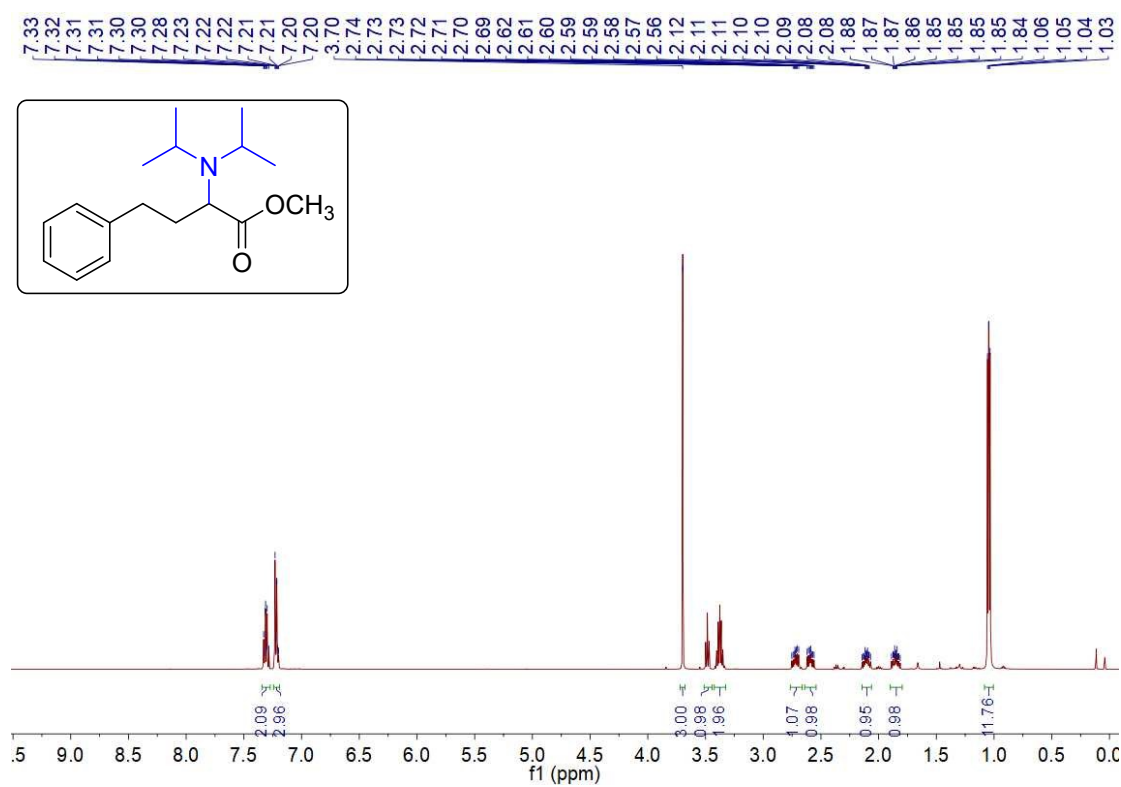

<sup>13</sup>C spectrum (CDCl<sub>3</sub>) methyl 2-(diisopropylamino)-4-phenylbutanoate (6k)

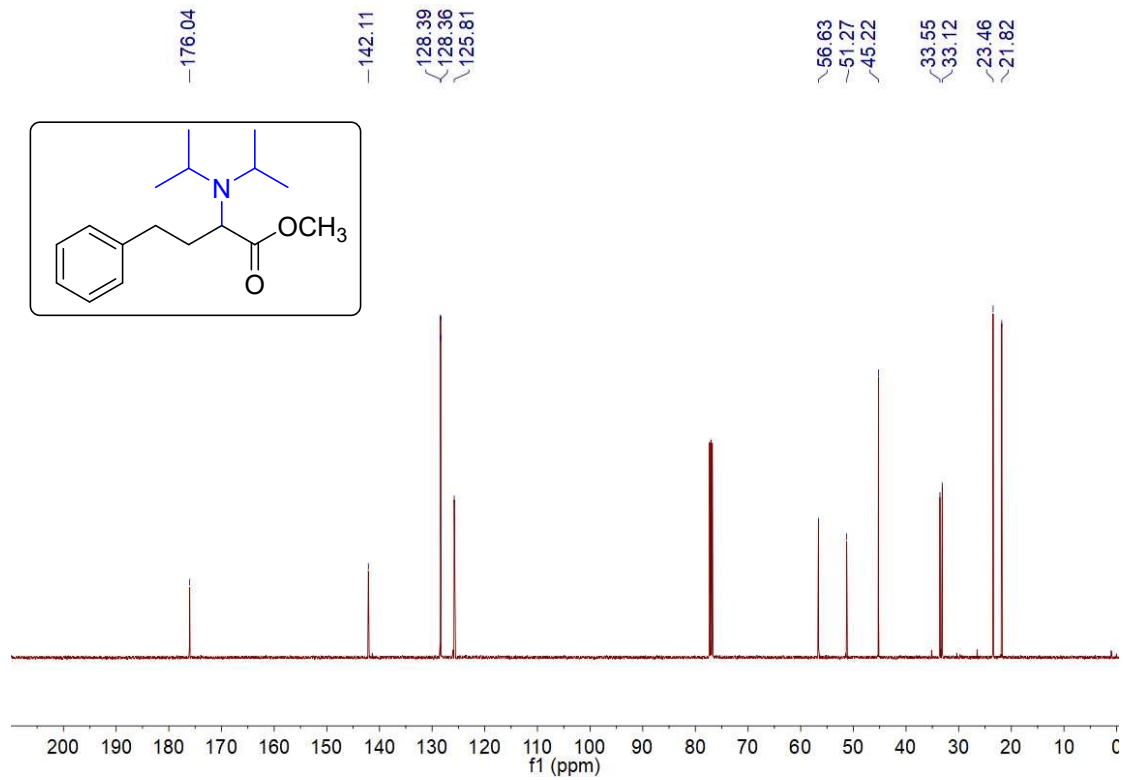

**<sup>1</sup>H spectrum (CDCl<sub>3</sub>) tert-butyl 4-(1-methoxy-1-oxo-4-phenylbutan-2-yl)piperazine-1-carboxylate (6l)**

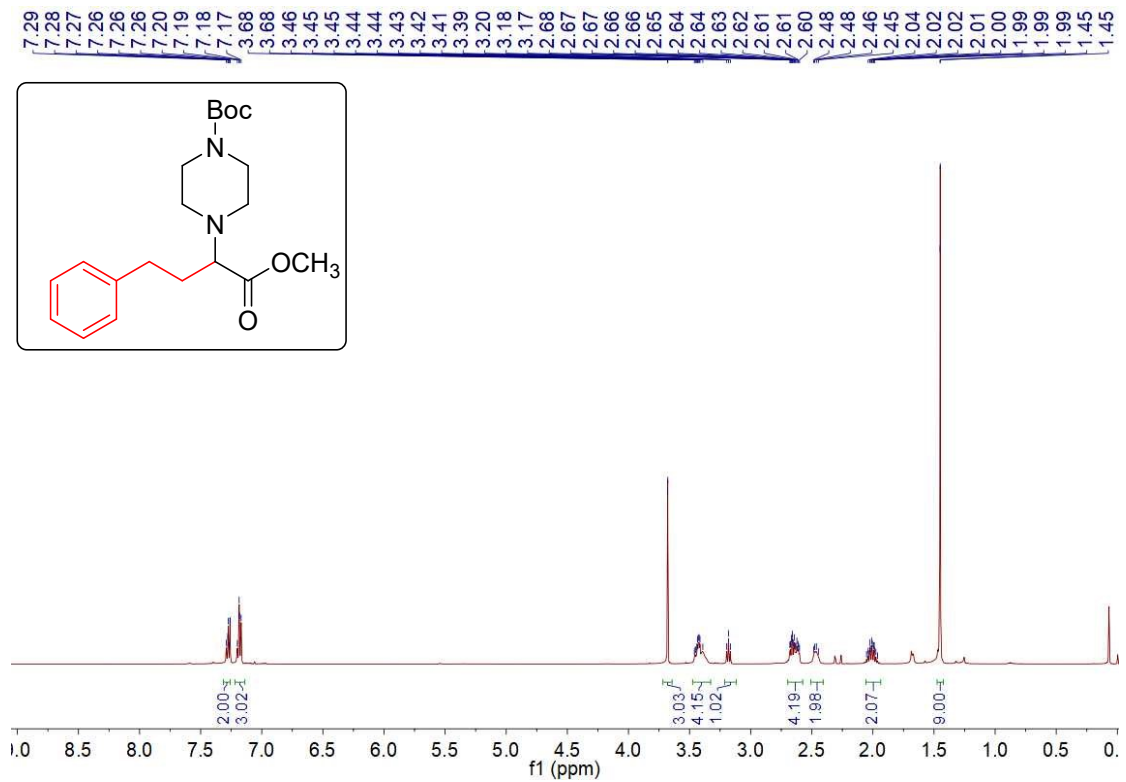

**<sup>13</sup>C spectrum (CDCl<sub>3</sub>) tert-butyl 4-(1-methoxy-1-oxo-4-phenylbutan-2-yl)piperazine-1-carboxylate (6l)**

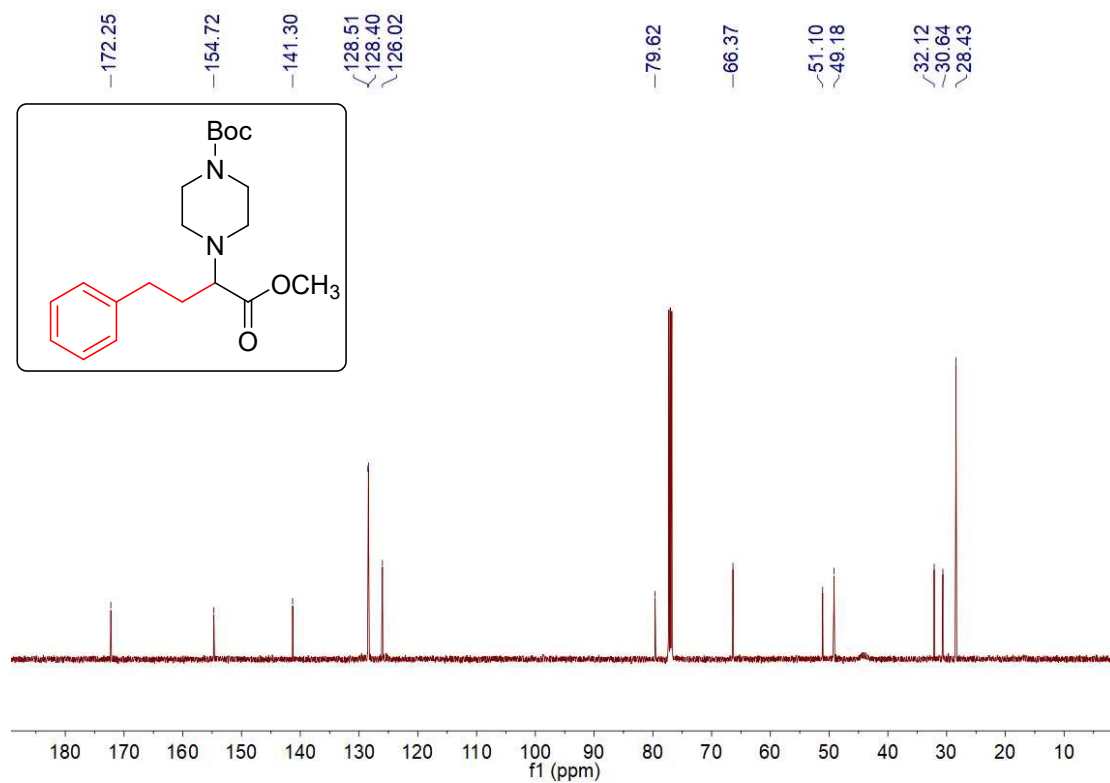

<sup>1</sup>H spectrum (CDCl<sub>3</sub>) tert-butyl 4-(4-(3,5-dimethylphenyl)-1-methoxy-1-oxobutan-2-yl)piperazine-1-carboxylate (6m)

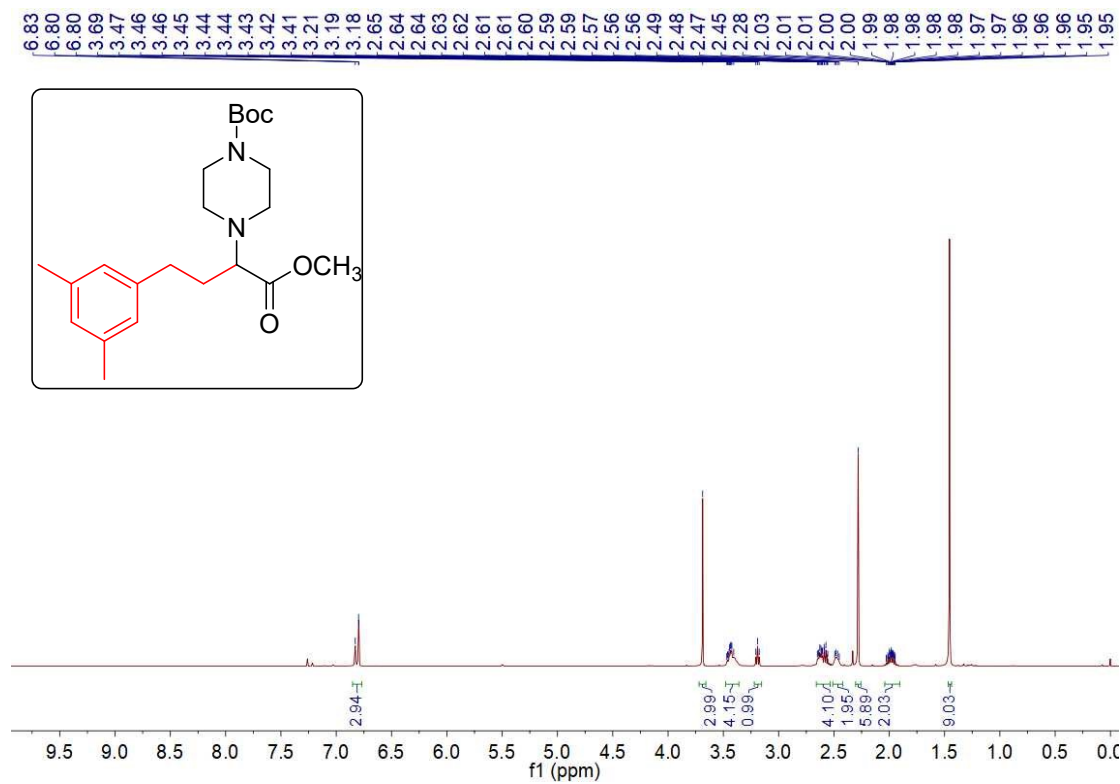

<sup>13</sup>C spectrum (CDCl<sub>3</sub>) tert-butyl 4-(4-(3,5-dimethylphenyl)-1-methoxy-1-oxobutan-2-yl)piperazine-1-carboxylate (6m)

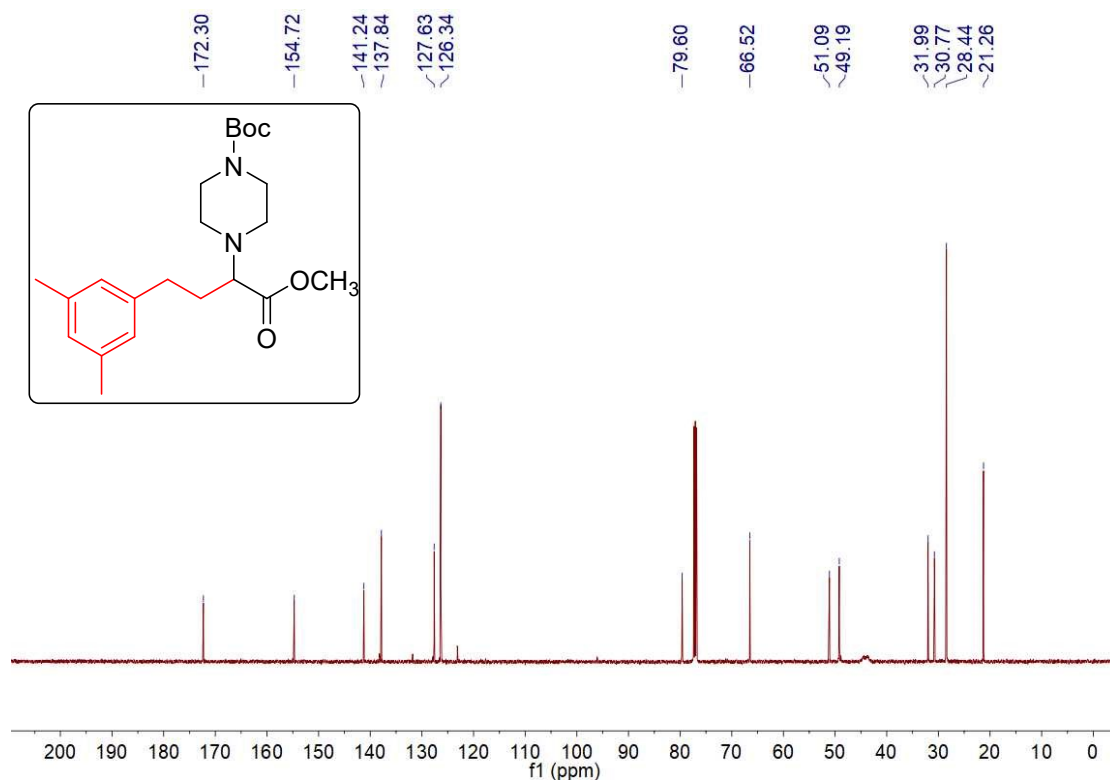

<sup>1</sup>H spectrum (CDCl<sub>3</sub>) tert-butyl 4-(4-(4-ethylphenyl)-1-methoxy-1-oxobutan-2-yl)piperazine-1-carboxylate (6n)

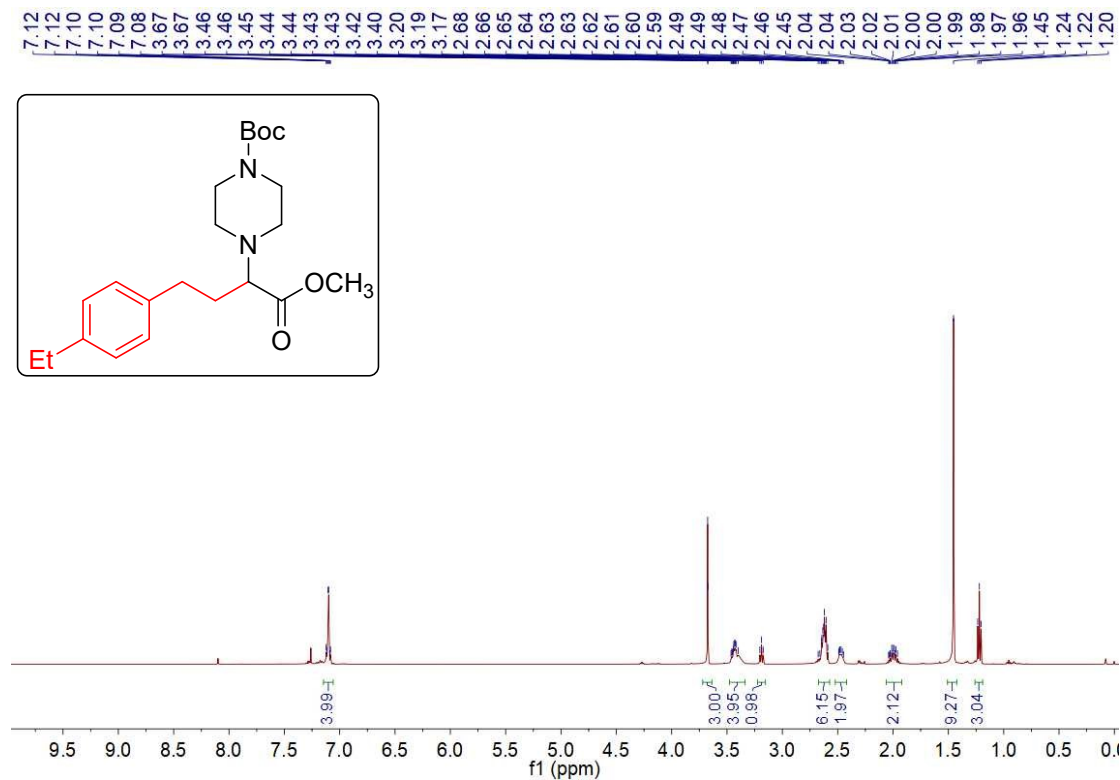

<sup>13</sup>C spectrum (CDCl<sub>3</sub>) tert-butyl 4-(4-(4-ethylphenyl)-1-methoxy-1-oxobutan-2-yl)piperazine-1-carboxylate (6n)



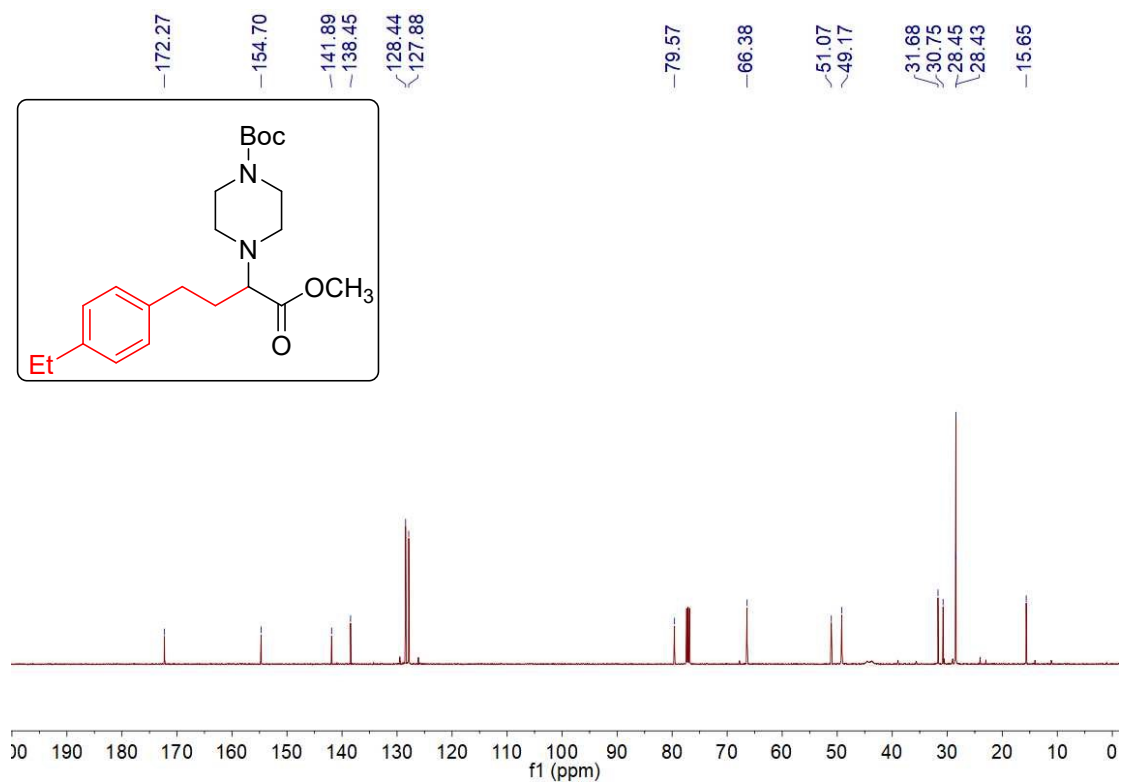

<sup>1</sup>H spectrum (CDCl<sub>3</sub>) tert-butyl 4-(4-([1,1'-biphenyl]-4-yl)-1-methoxy-1-oxobutan-2-yl)piperazine-1-carboxylate (60)

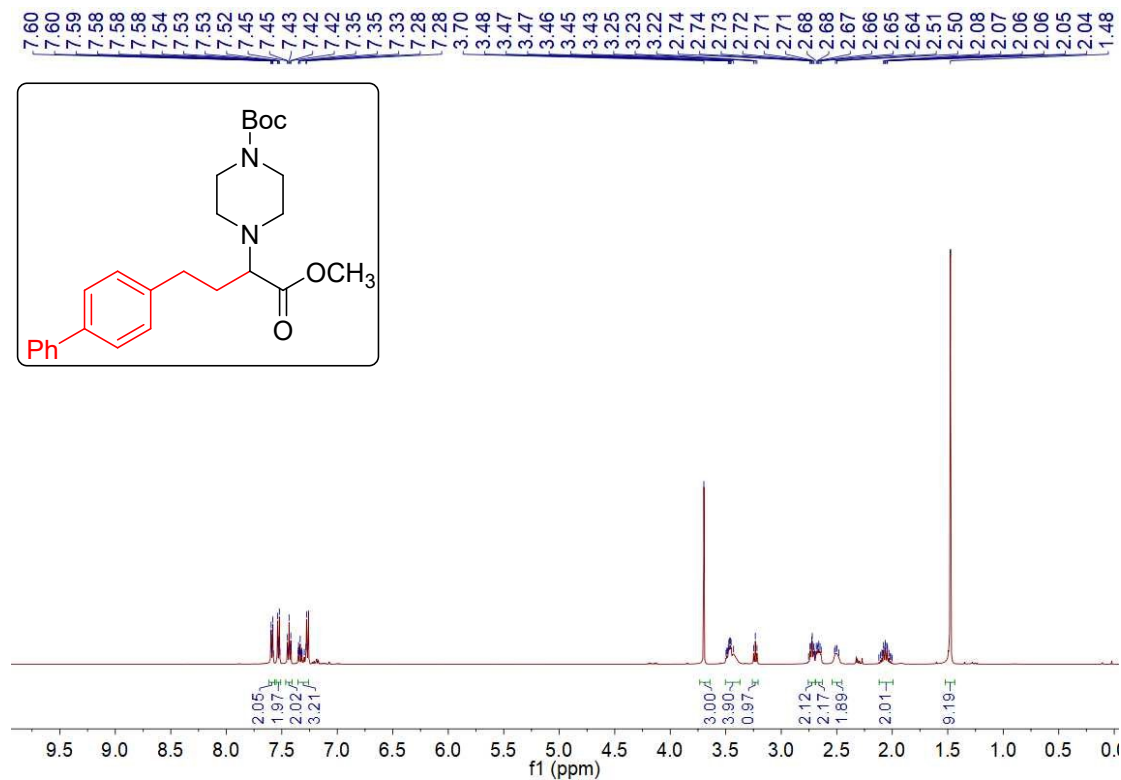

<sup>13</sup>C spectrum (CDCl<sub>3</sub>) tert-butyl 4-(4-([1,1'-biphenyl]-4-yl)-1-methoxy-1-oxobutan-2-yl)piperazine-1-carboxylate (60)

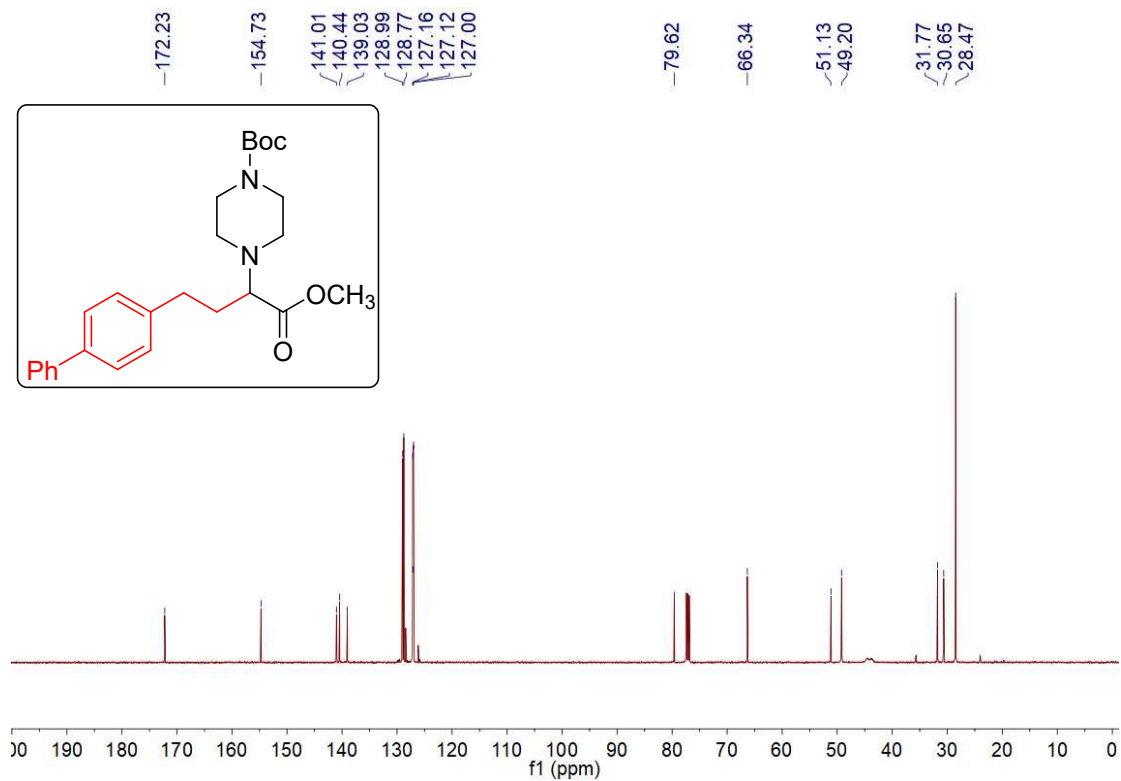

<sup>1</sup>H spectrum (CDCl<sub>3</sub>) tert-butyl 4-(1-methoxy-4-(4-methoxyphenyl)-1-oxobutan-2-yl)piperazine-1-carboxylate (6p)

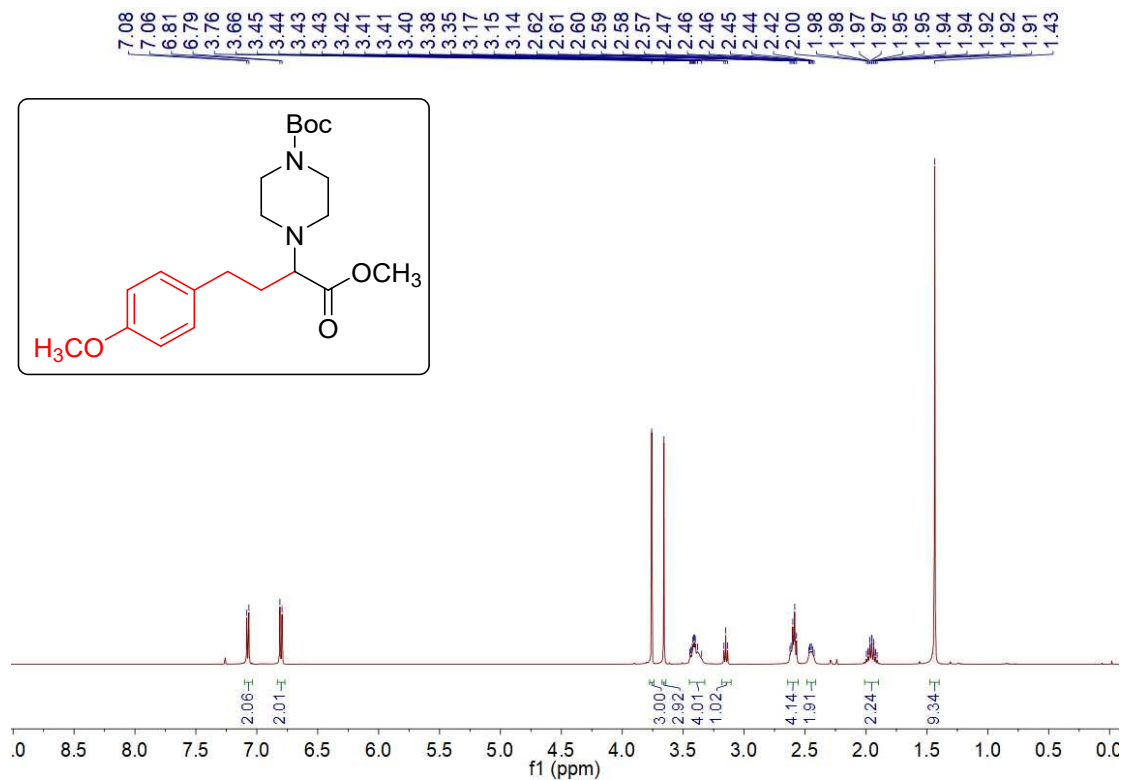

<sup>13</sup>C spectrum (CDCl<sub>3</sub>) tert-butyl 4-(1-methoxy-4-(4-methoxyphenyl)-1-oxobutan-2-yl)piperazine-1-carboxylate (6p)

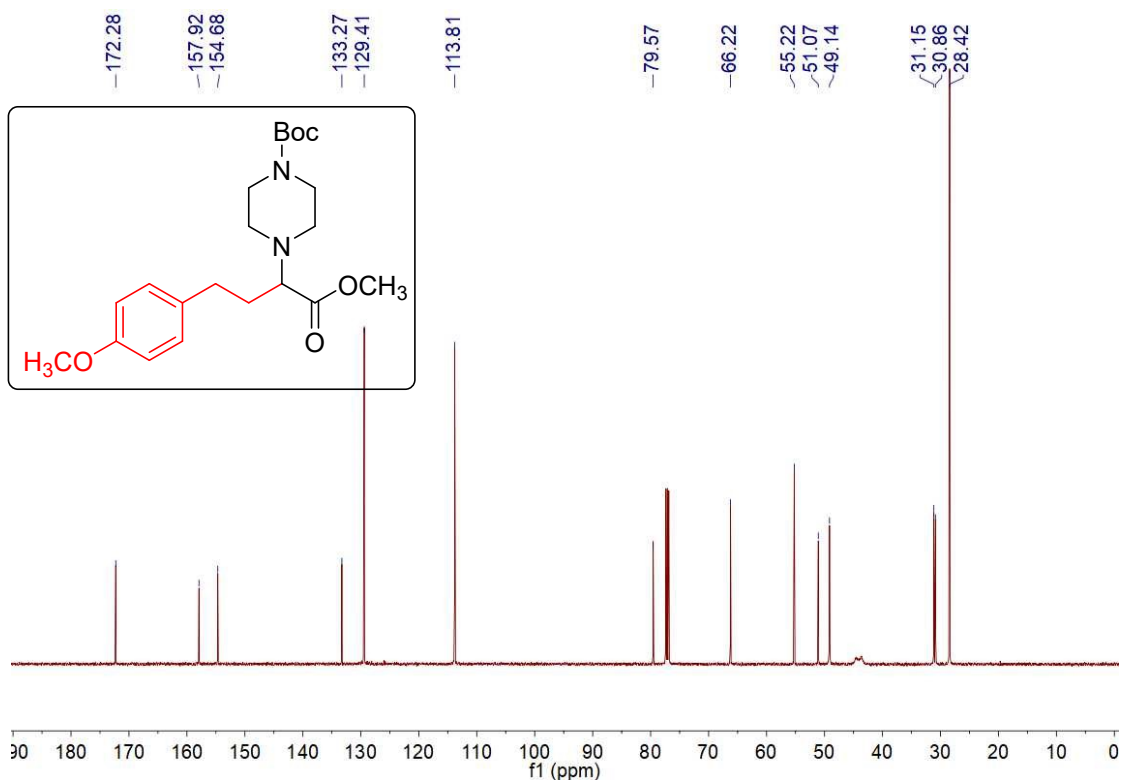

**<sup>1</sup>H spectrum (CDCl<sub>3</sub>) tert-butyl 4-(1-methoxy-1-oxo-4-(3-(trifluoromethyl)phenyl)butan-2-yl)piperazine-1-carboxylate (6q)**

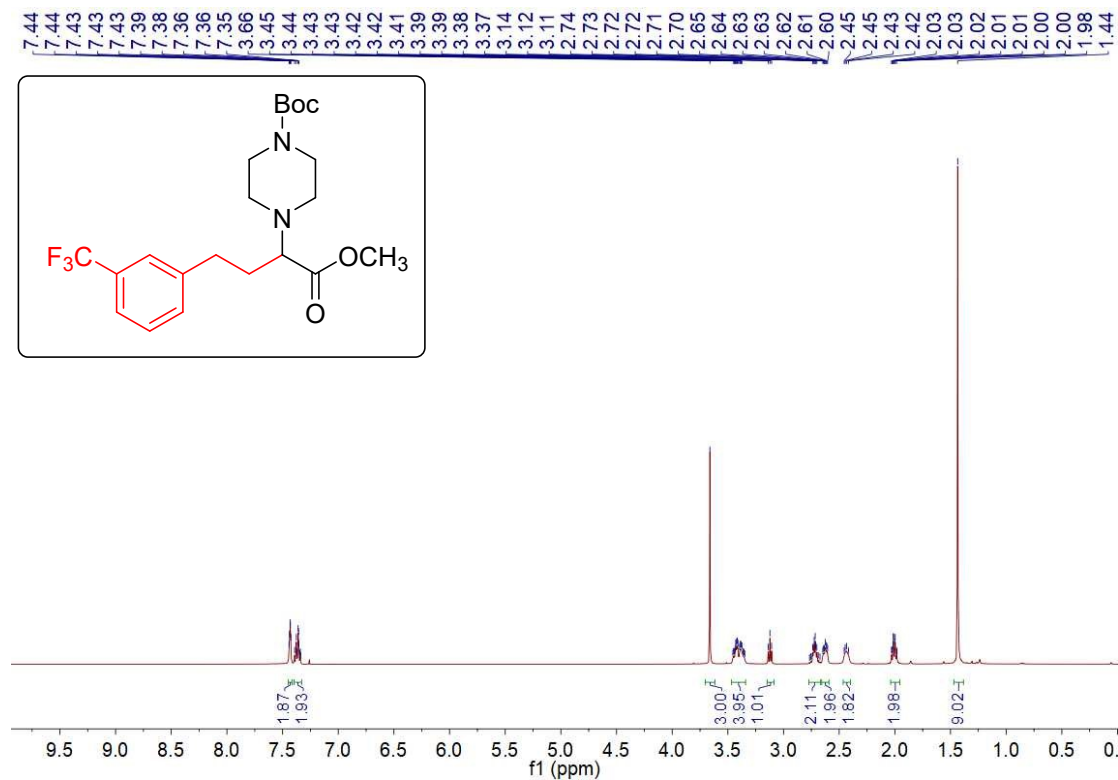

**<sup>13</sup>C spectrum (CDCl<sub>3</sub>) tert-butyl 4-(1-methoxy-1-oxo-4-(3-(trifluoromethyl)phenyl)butan-2-yl)piperazine-1-carboxylate (6q)**

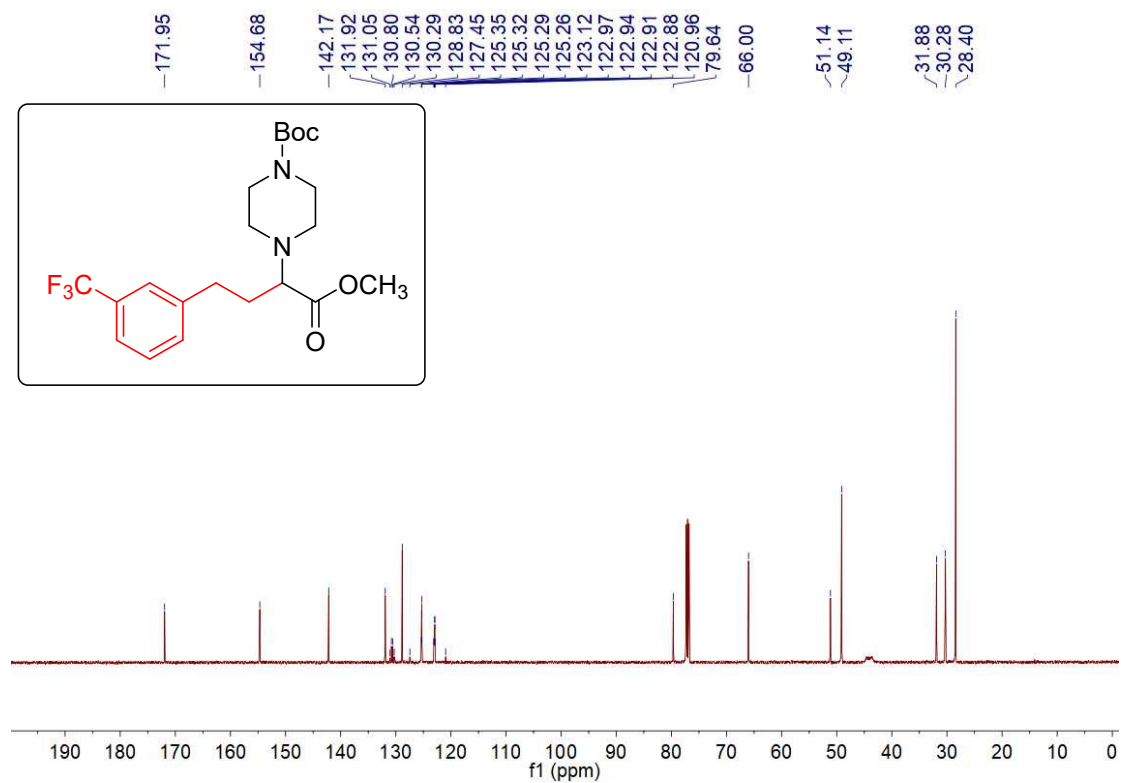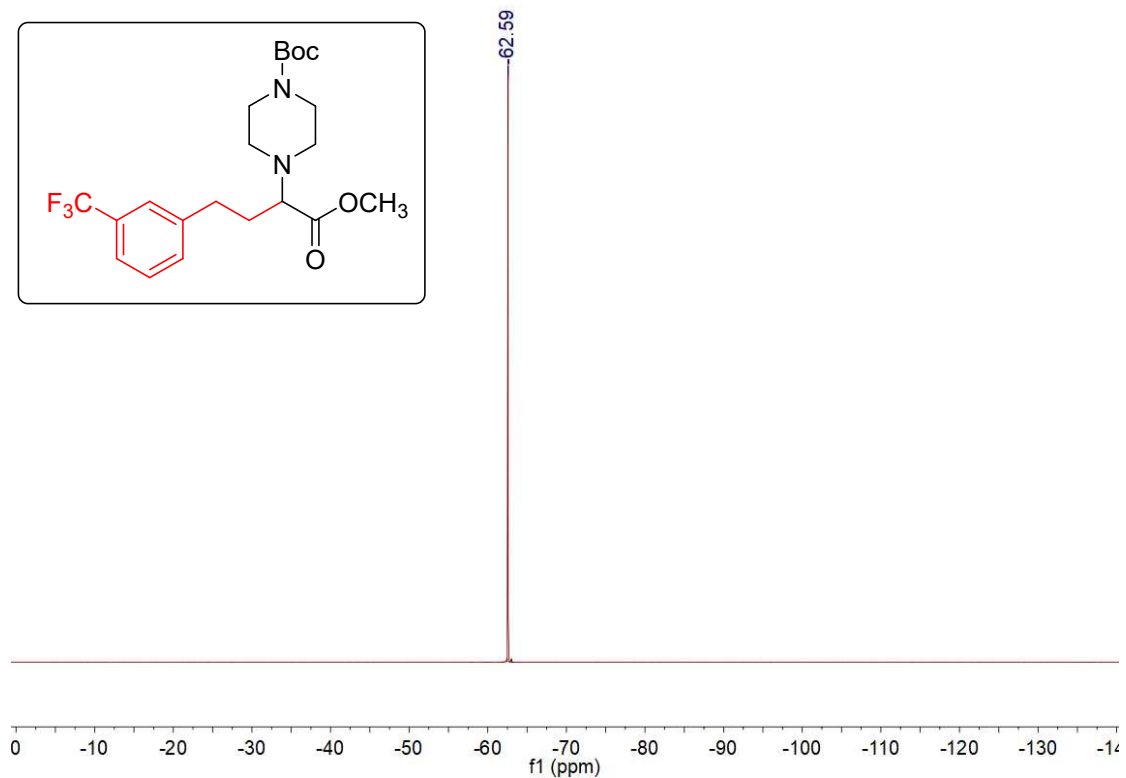

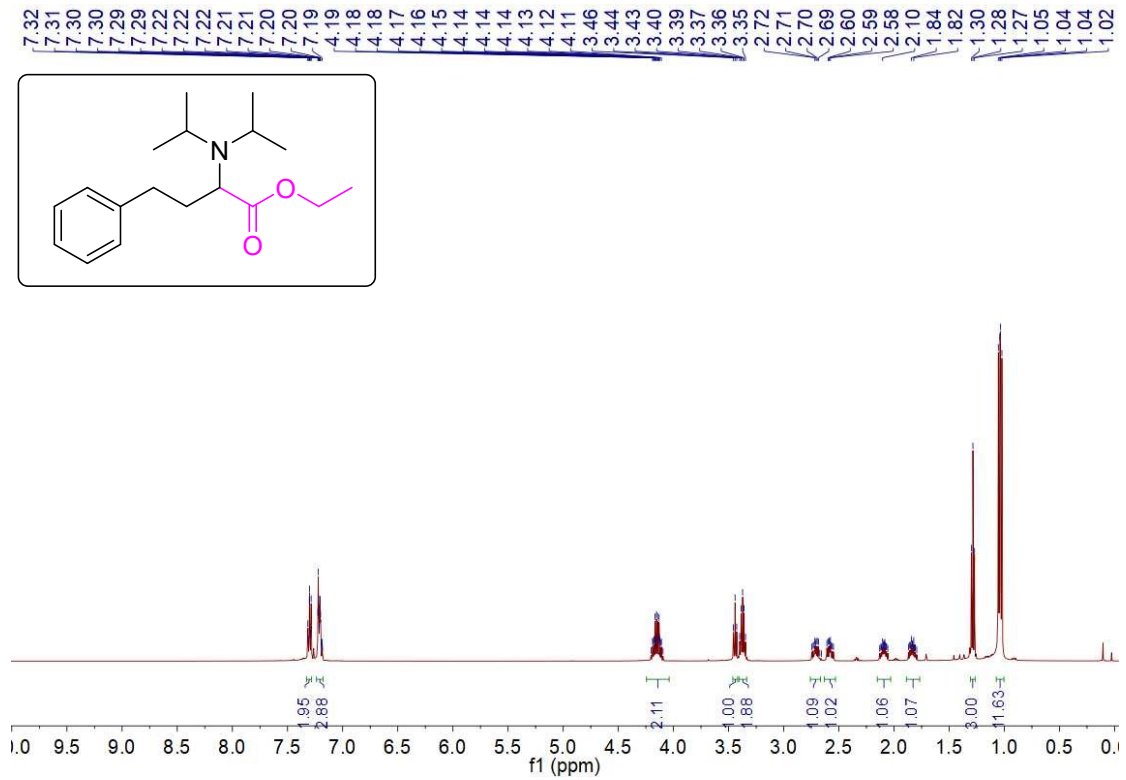

<sup>13</sup>C spectrum (CDCl<sub>3</sub>) ethyl 2-(diisopropylamino)-4-phenylbutanoate (6r)

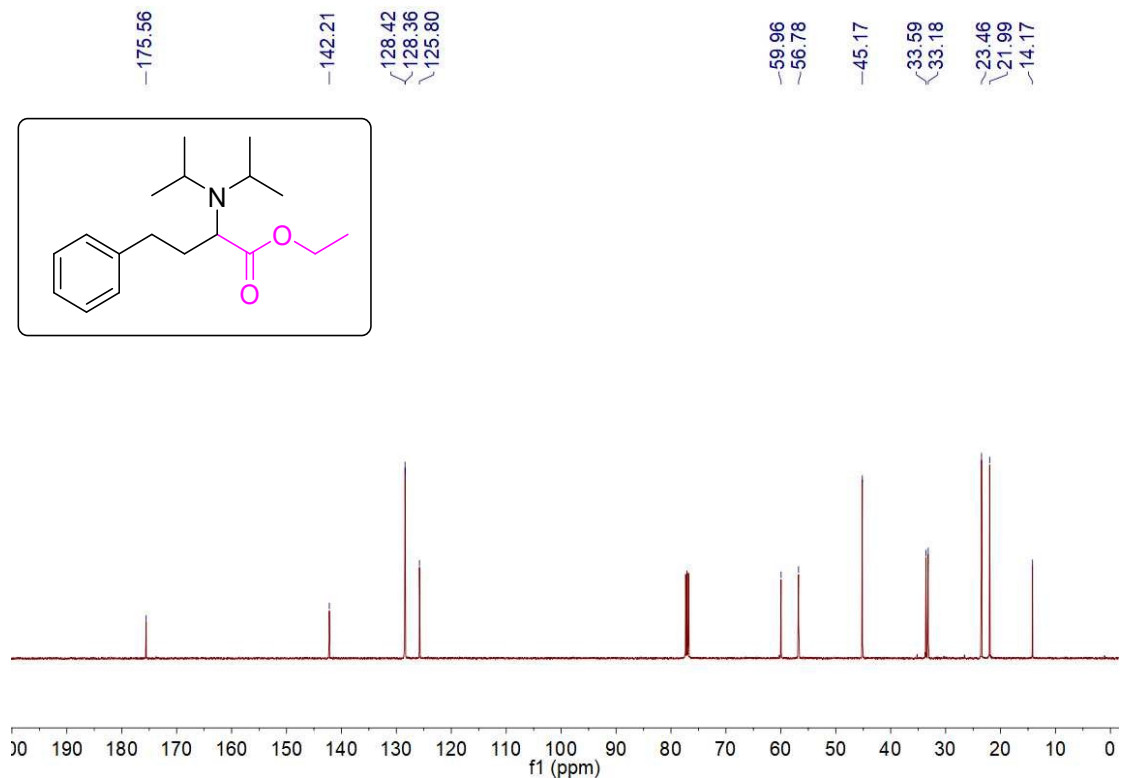

<sup>13</sup>C spectrum (CDCl<sub>3</sub>) propyl 2-(diisopropylamino)-4-phenylbutanoate (6s)

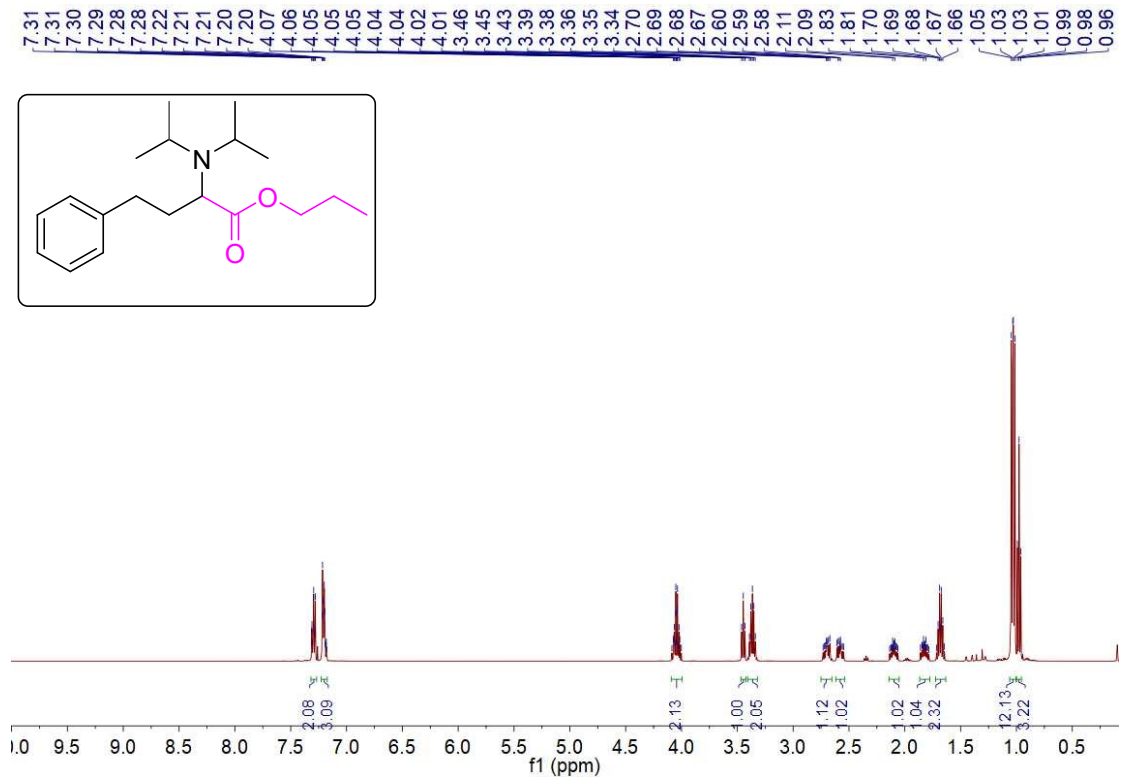

**<sup>13</sup>C spectrum (CDCl<sub>3</sub>) propyl 2-(diisopropylamino)-4-phenylbutanoate (6s)**

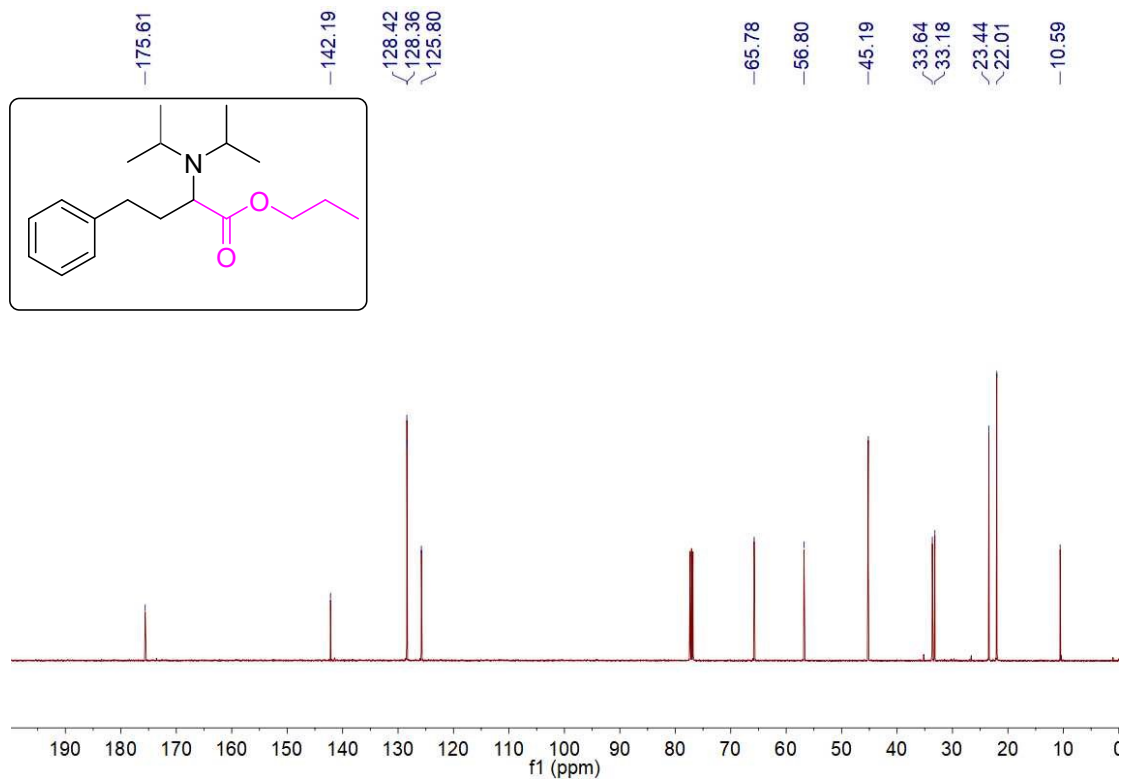

**<sup>1</sup>H spectrum (CDCl<sub>3</sub>) isopropyl 2-(diisopropylamino)-4-phenylbutanoate (6t)**

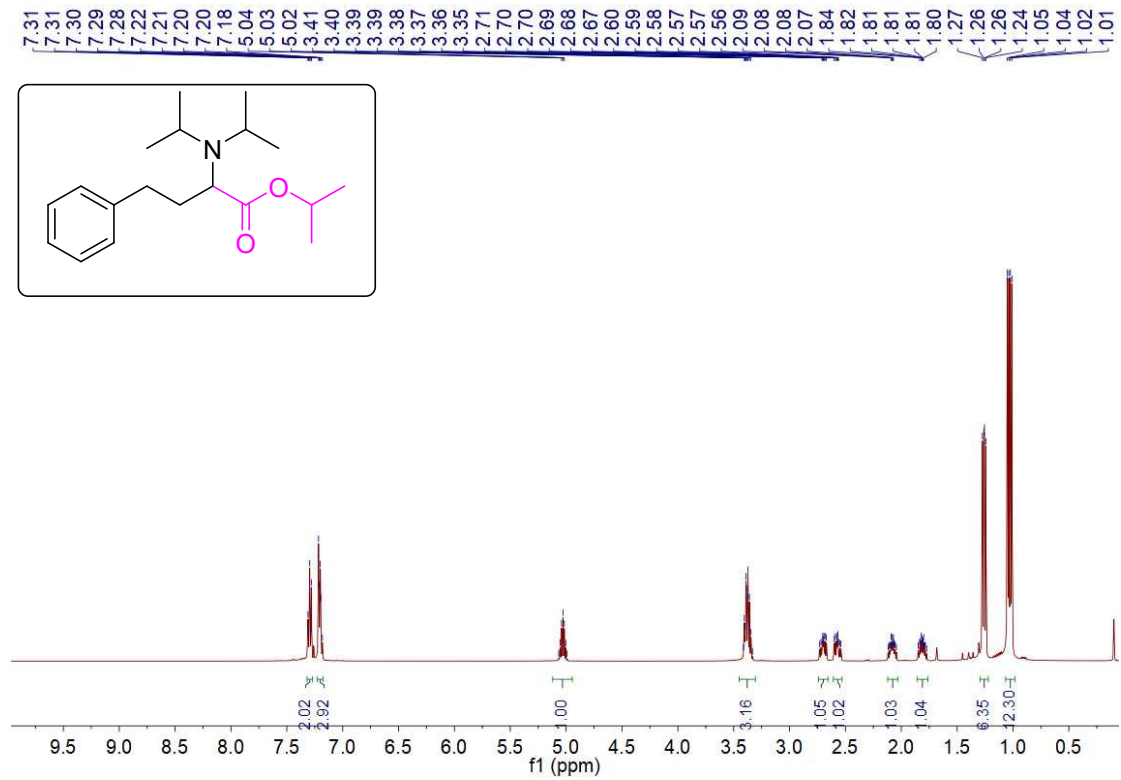

**<sup>13</sup>C spectrum (CDCl<sub>3</sub>) isopropyl 2-(diisopropylamino)-4-phenylbutanoate (6t)**

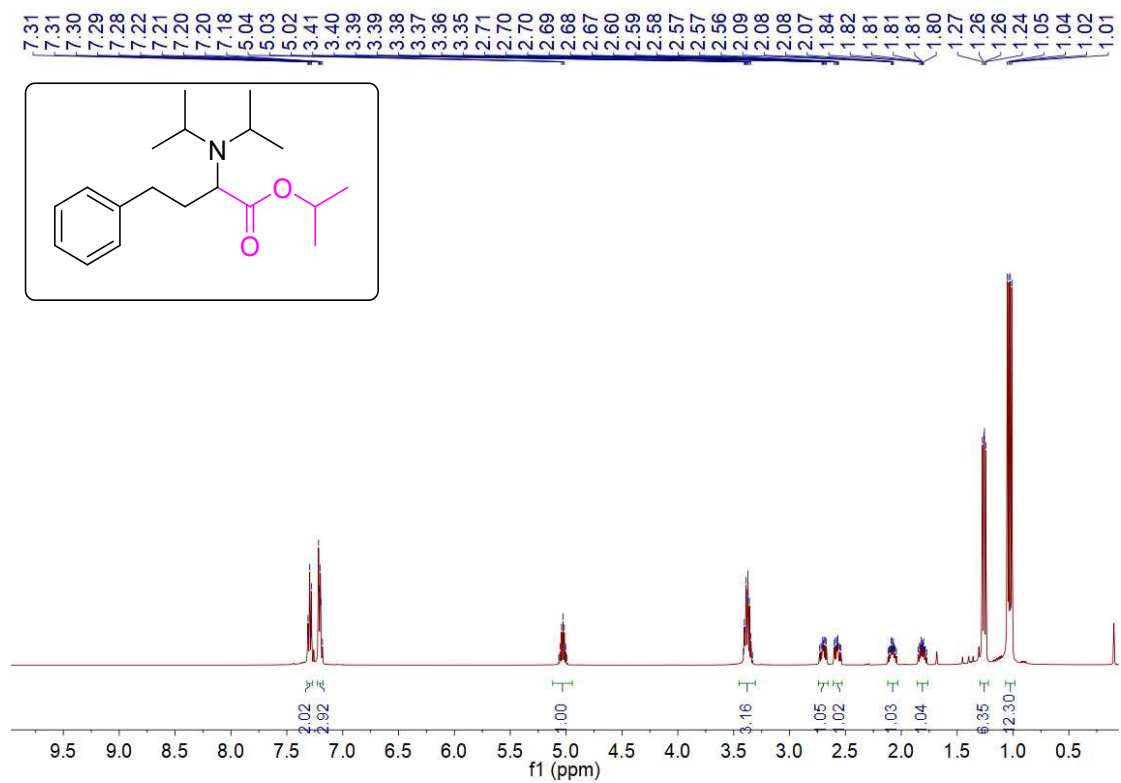

**<sup>1</sup>H spectrum (CDCl<sub>3</sub>) 2-methoxyethyl 2-(diisopropylamino)-4-phenylbutanoate (6u)**

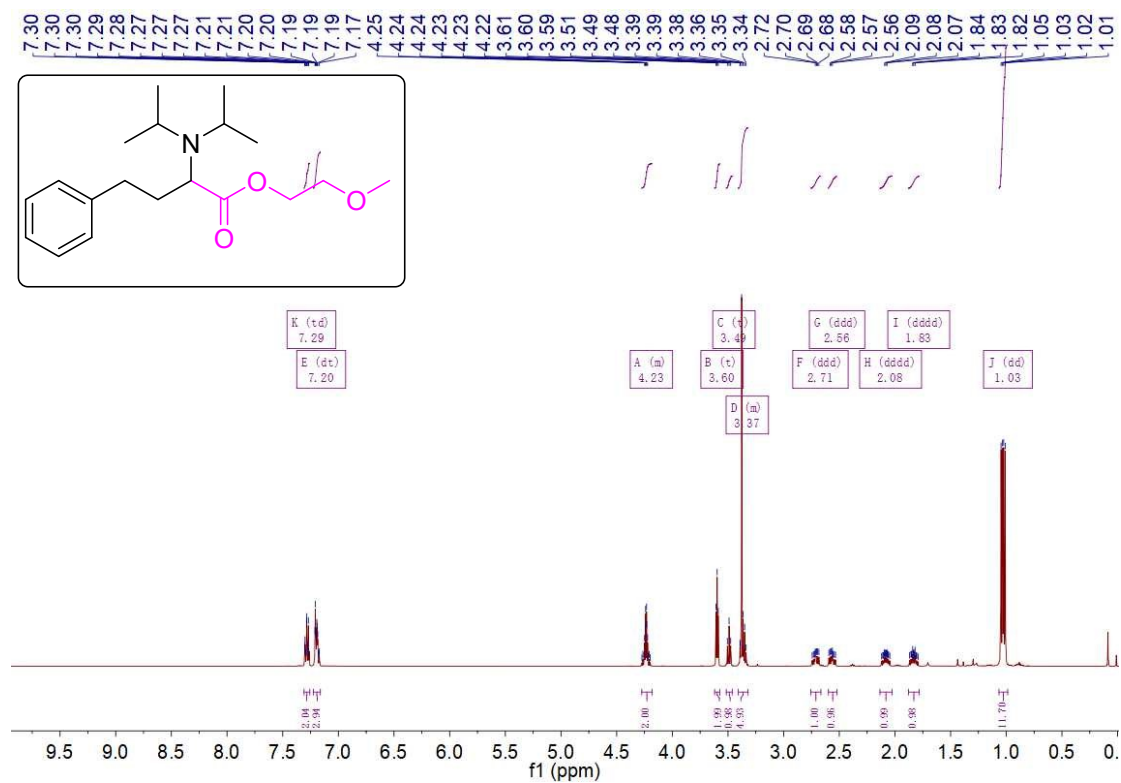

**<sup>13</sup>C spectrum (CDCl<sub>3</sub>) 2-methoxyethyl 2-(diisopropylamino)-4-phenylbutanoate (6u)**

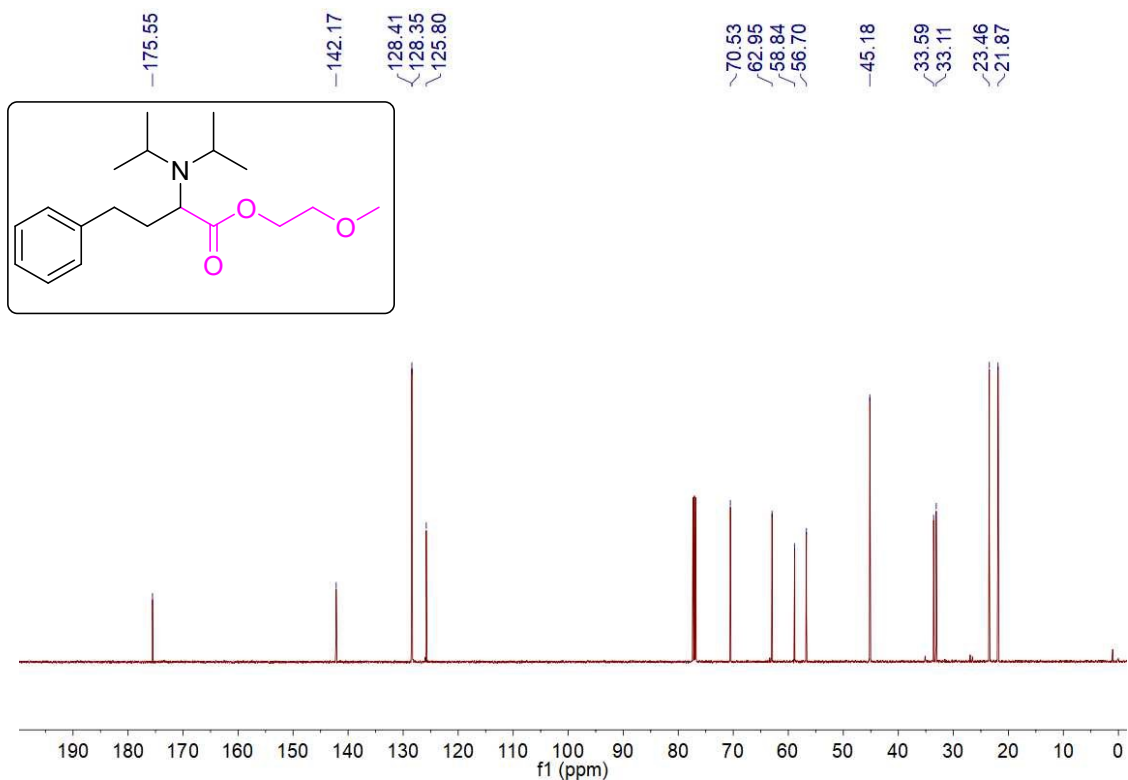

**<sup>1</sup>H spectrum (CDCl<sub>3</sub>) 2-ethoxyethyl 2-(diisopropylamino)-4-phenylbutanoate (6v)**



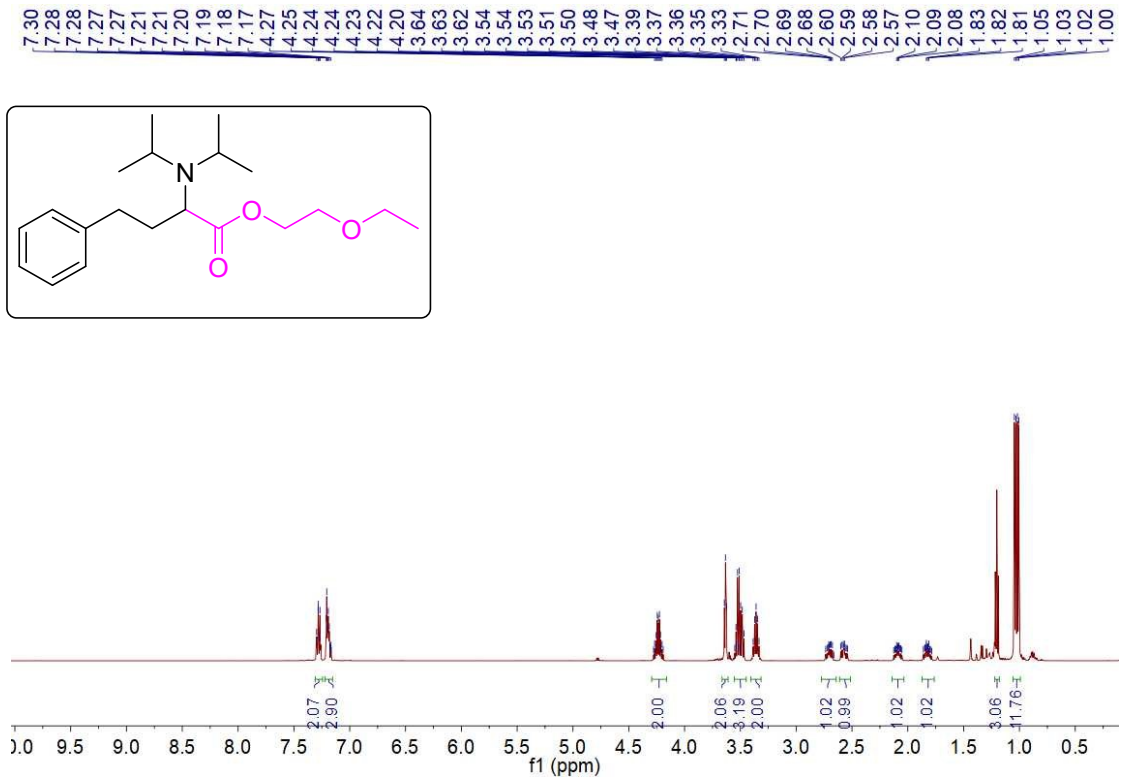

<sup>13</sup>C spectrum (CDCl<sub>3</sub>) 2-ethoxyethyl 2-(diisopropylamino)-4-phenylbutanoate (6v)

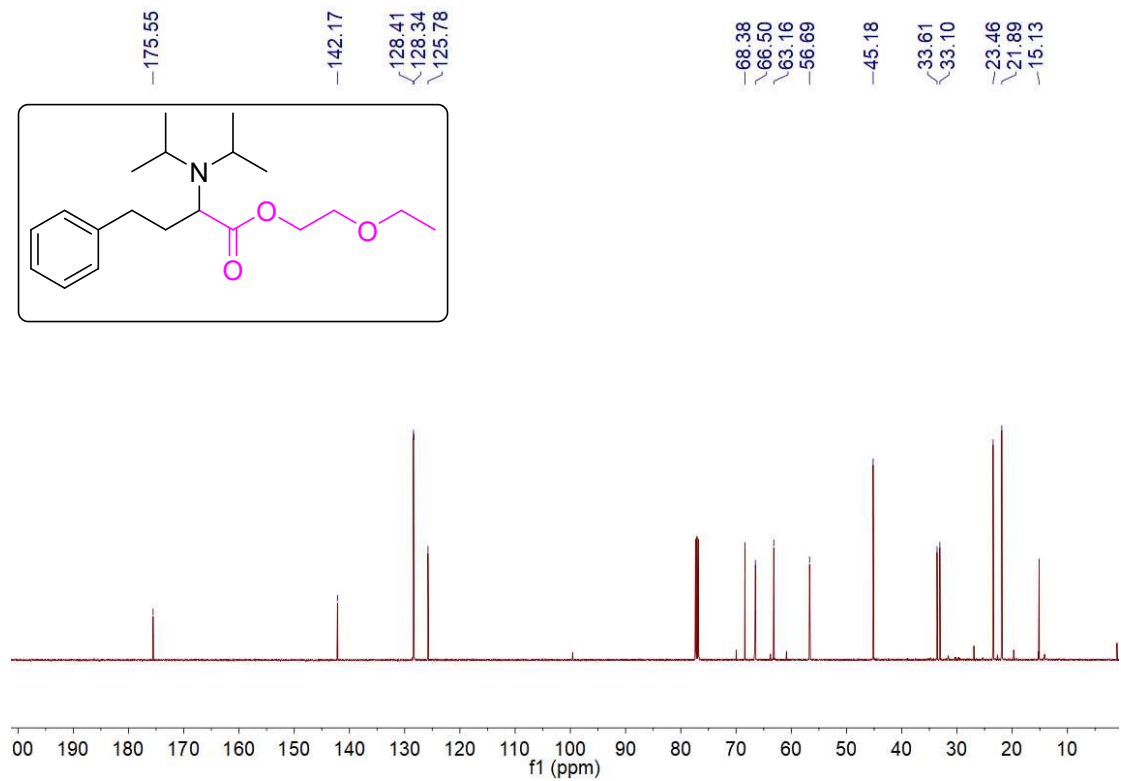

<sup>1</sup>H spectrum (CDCl<sub>3</sub>) 2-fluoro-5-phenylfuran (7a)

7.61  
7.61  
7.60  
7.60  
7.59  
7.59  
7.42  
7.41  
7.40  
7.40  
7.39  
7.39  
7.30  
7.29  
7.28  
6.57  
6.56  
6.55  
5.55  
5.55  
5.54  
5.53

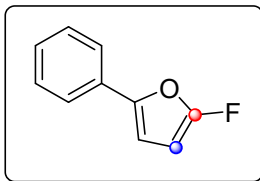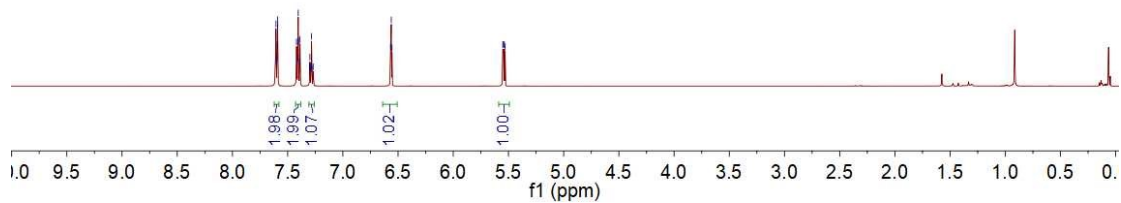

<sup>13</sup>C spectrum (CDCl<sub>3</sub>) 2-fluoro-5-phenylfuran (7a)

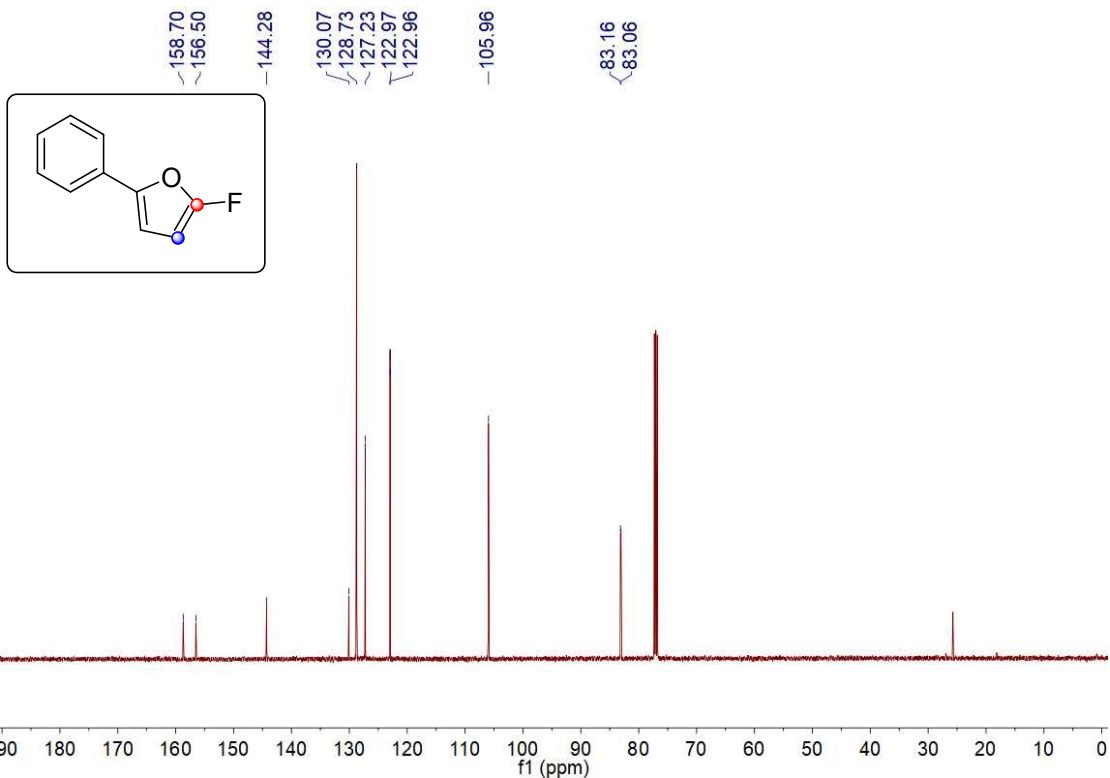

<sup>19</sup>F spectrum (CDCl<sub>3</sub>) 2-fluoro-5-phenylfuran (7a)

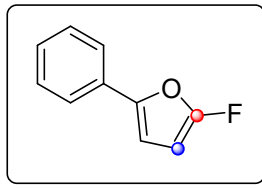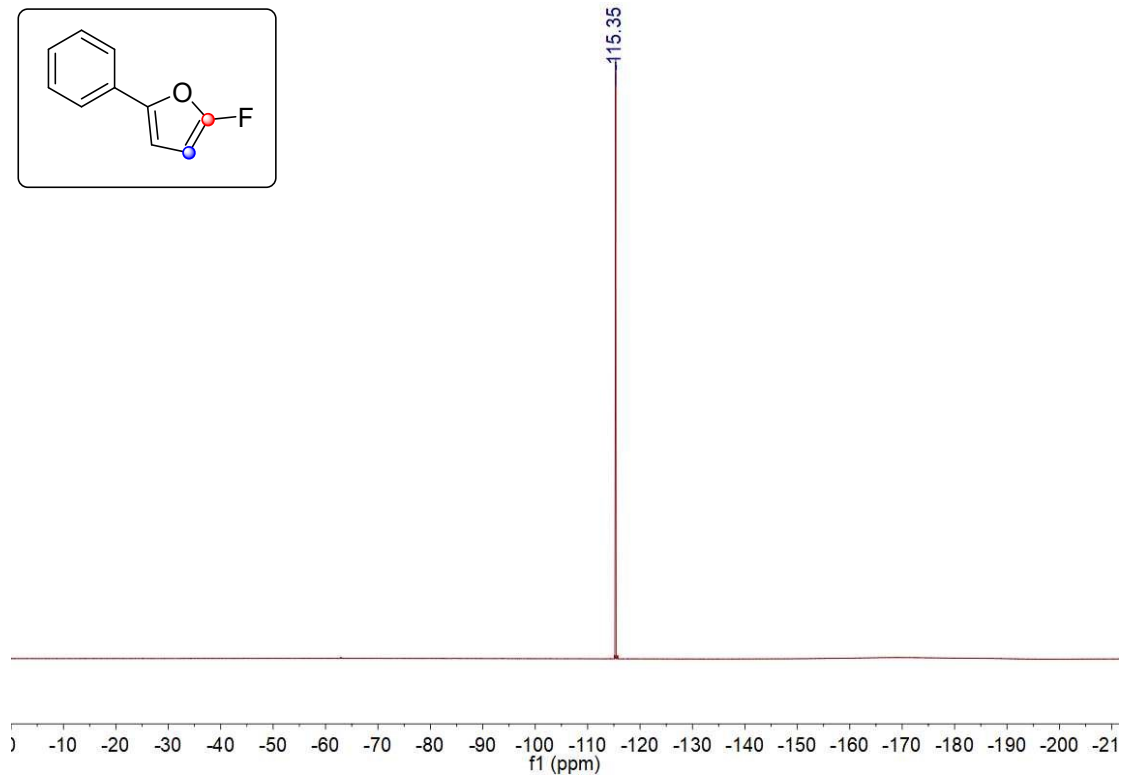

$^1\text{H}$  spectrum ( $\text{CDCl}_3$ ) 2-([1,1'-biphenyl]-4-yl)-5-fluorofuran (7b)

7.70  
7.68  
7.67  
7.66  
7.65  
7.64  
7.63  
7.52  
7.51  
7.49  
7.48  
7.43  
7.42  
7.40  
6.62  
6.61  
6.60  
5.60  
5.59  
5.58  
5.57

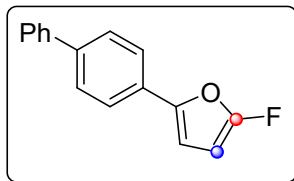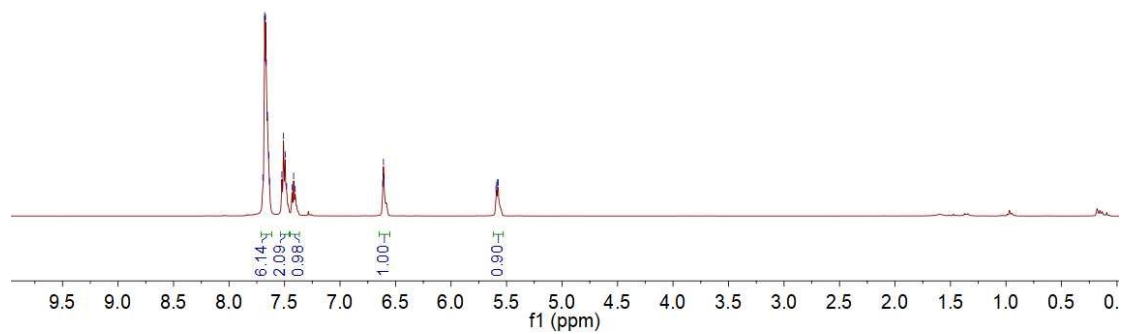

$^{13}\text{C}$  spectrum ( $\text{CDCl}_3$ ) 2-([1,1'-biphenyl]-4-yl)-5-fluorofuran (7b)

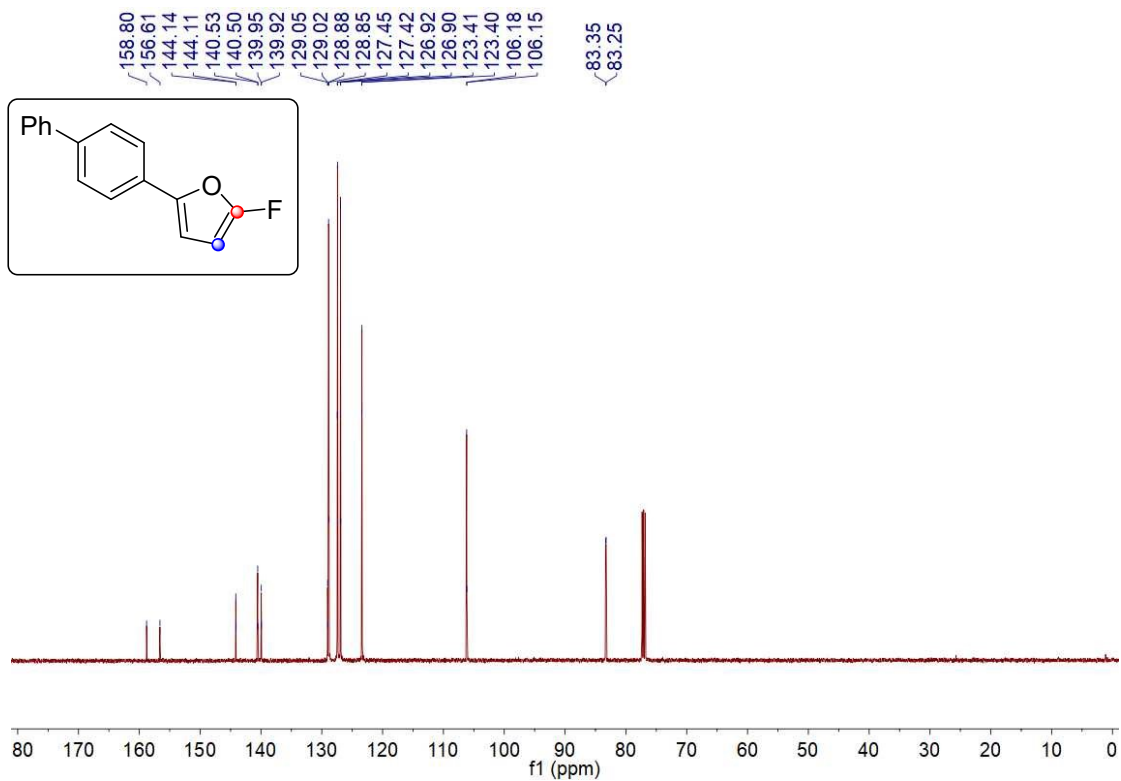

<sup>19</sup>F spectrum (CDCl<sub>3</sub>) 2-([1,1'-biphenyl]-4-yl)-5-fluorofuran (7b)

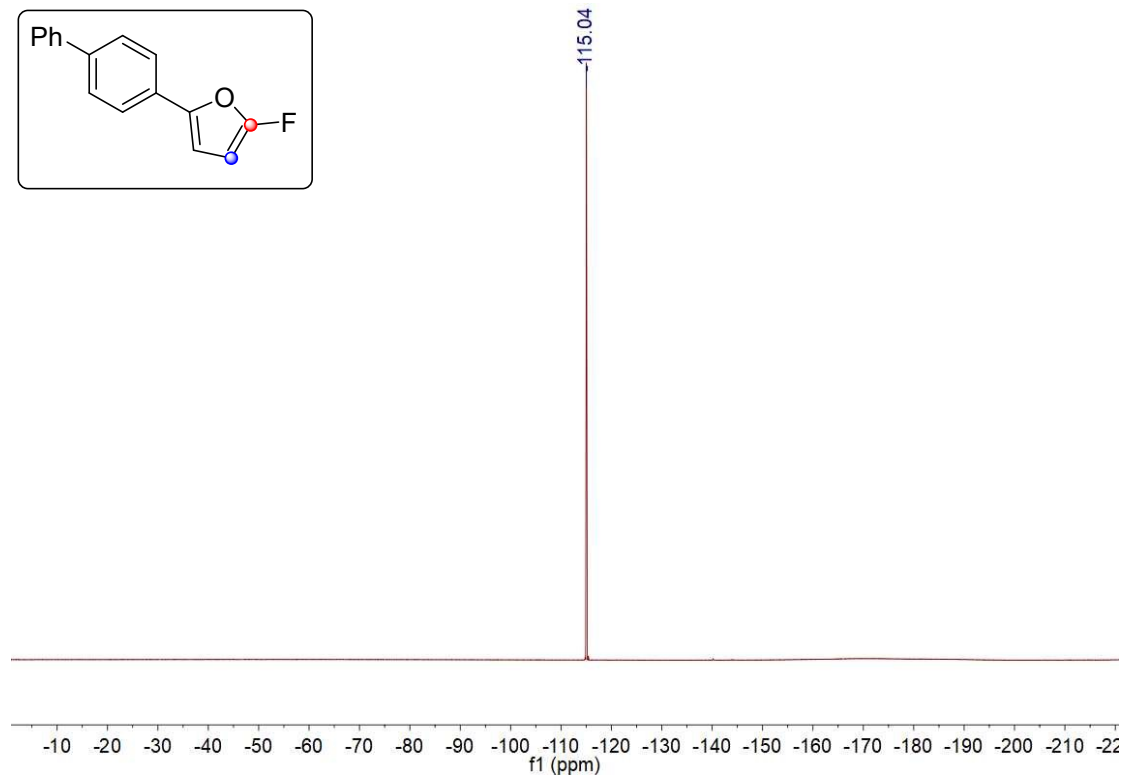

<sup>1</sup>H spectrum (DMSO-*d*<sub>6</sub>) 2-([1,1'-biphenyl]-2-yl)-5-fluorofuran (7c)

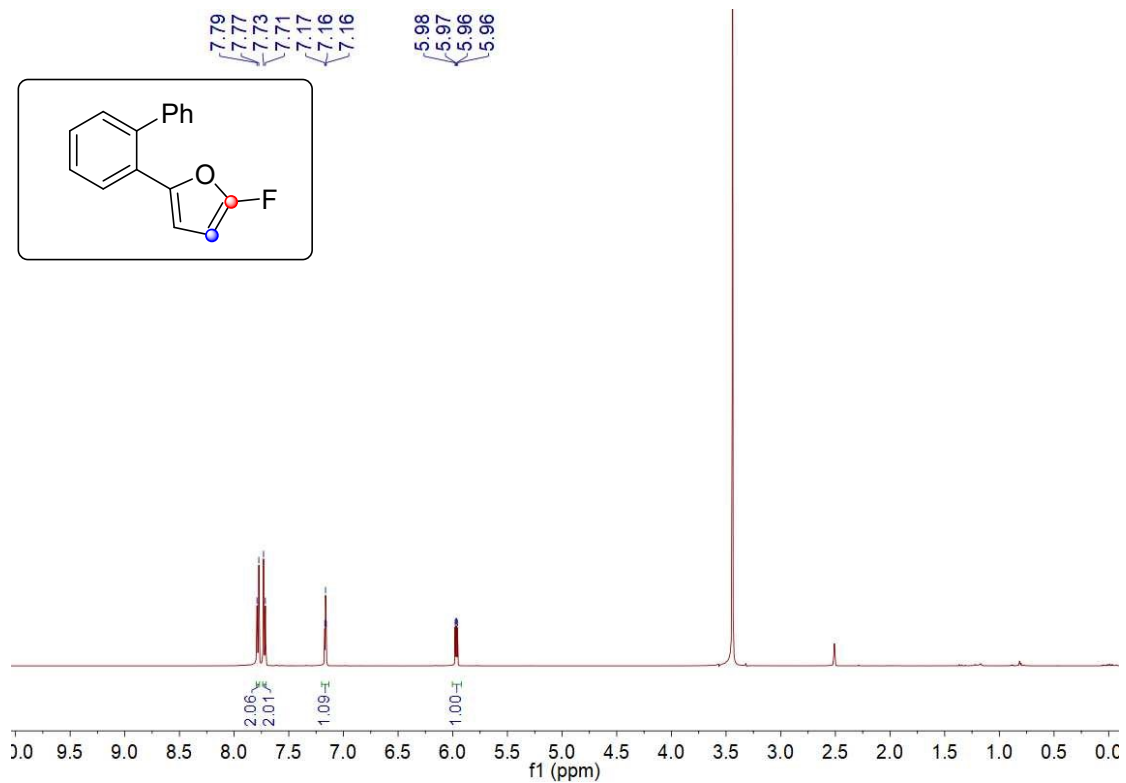

**<sup>13</sup>C spectrum (DMSO-*d*<sub>6</sub>) 2-([1,1'-biphenyl]-2-yl)-5-fluorofuran (7c)**

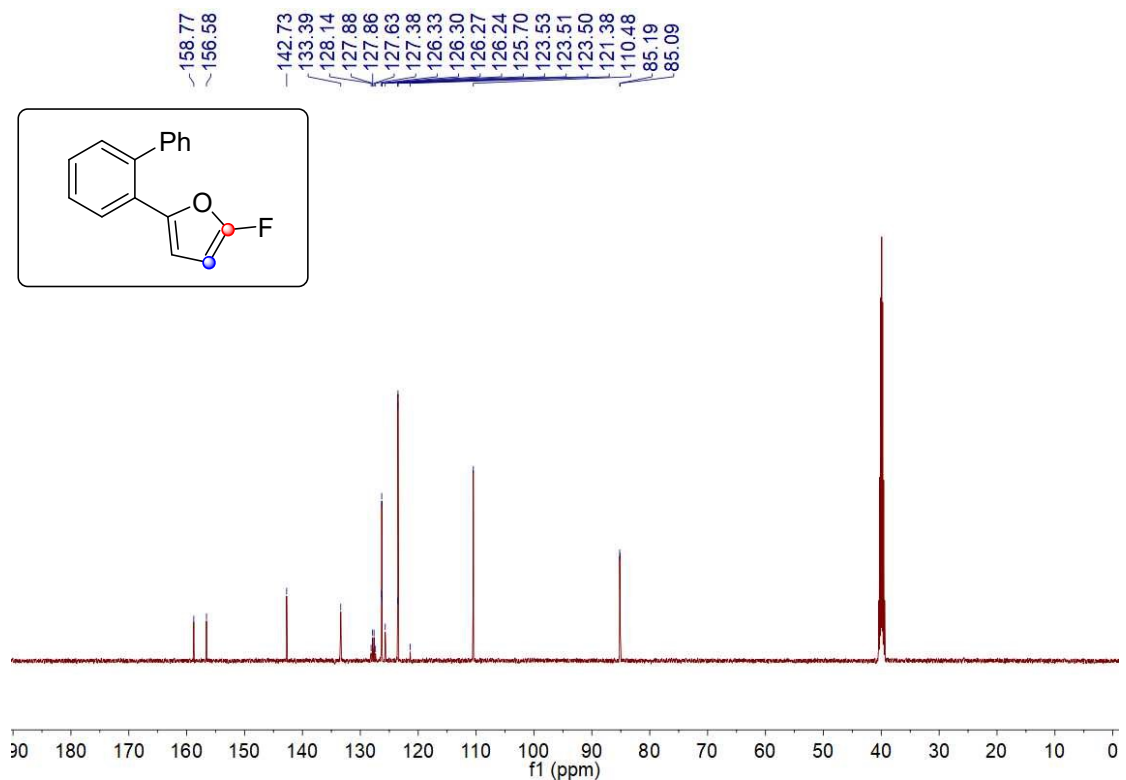

**<sup>19</sup>F spectrum (DMSO-*d*<sub>6</sub>) 2-([1,1'-biphenyl]-2-yl)-5-fluorofuran (7c)**

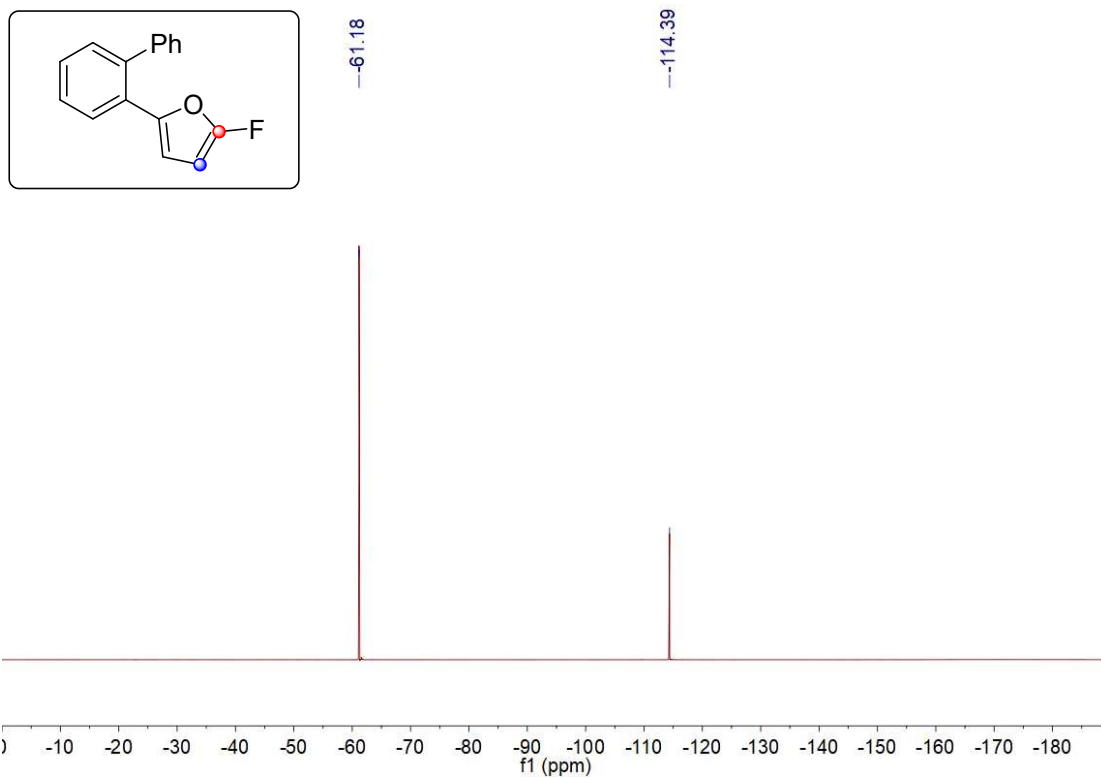

**<sup>1</sup>H spectrum (DMSO-*d*<sub>6</sub>) 2-fluoro-5-(4-fluorophenyl) furan (7d)**

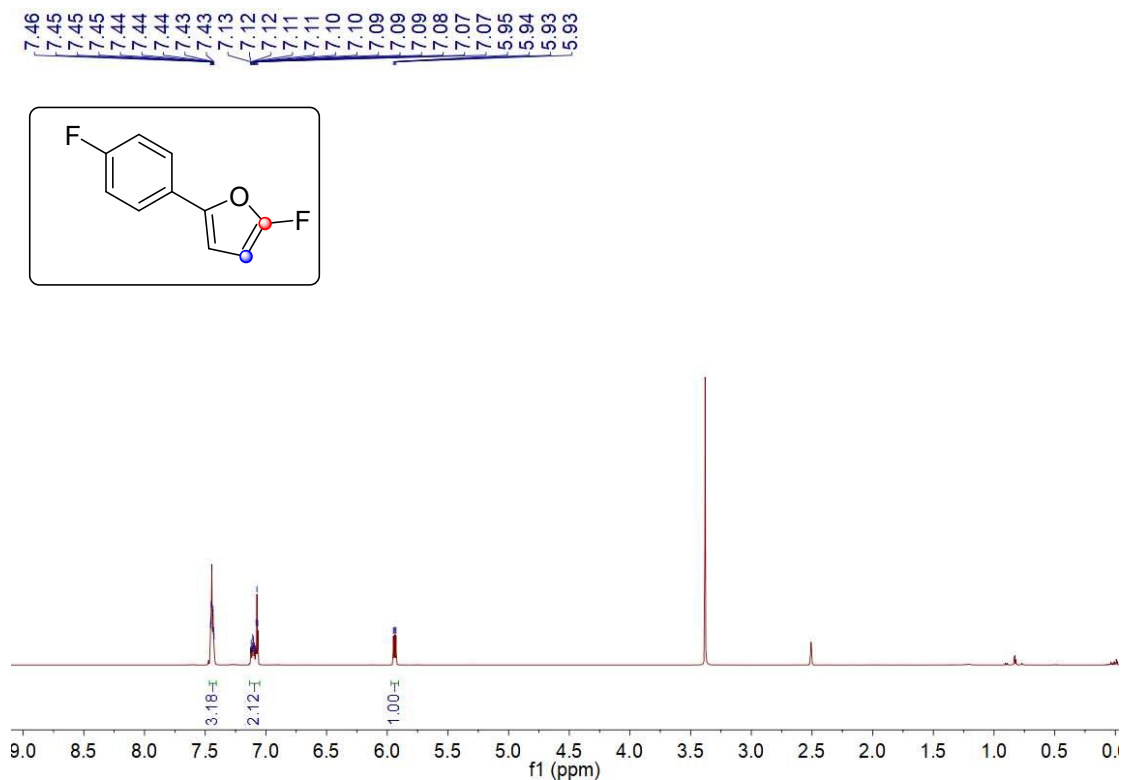

**<sup>13</sup>C spectrum (DMSO-*d*<sub>6</sub>) 2-fluoro-5-(4-fluorophenyl) furan (7d)**

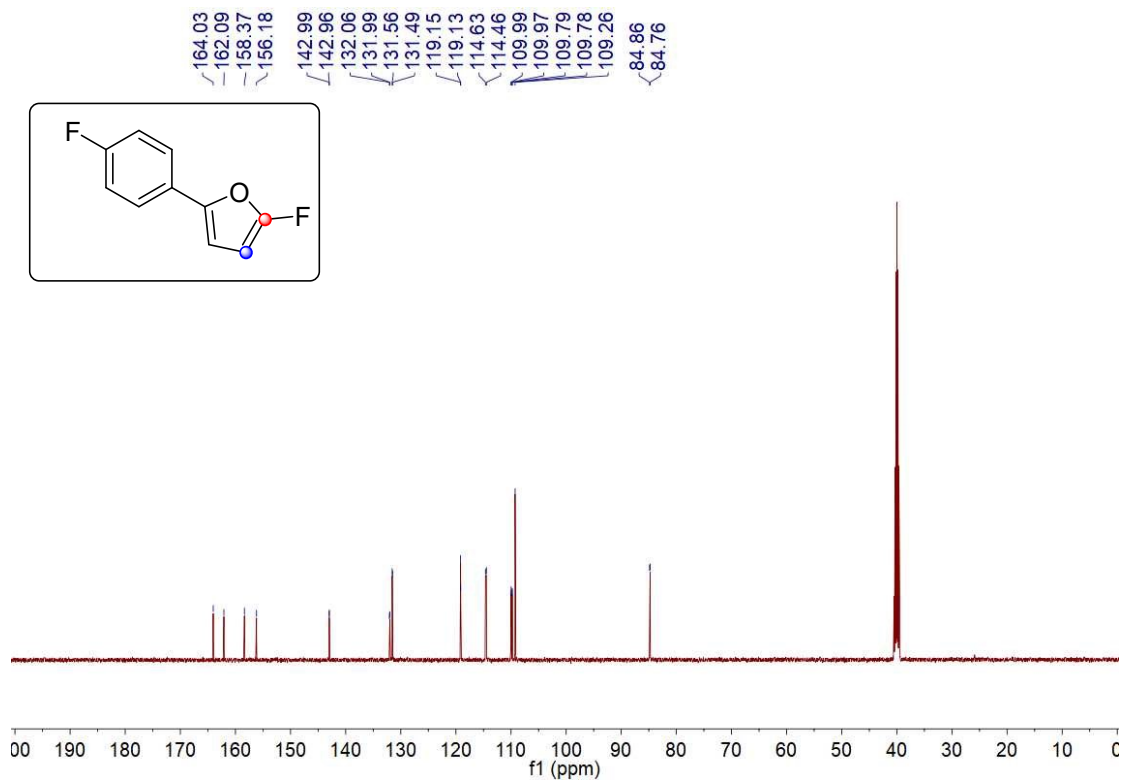

<sup>19</sup>F spectrum (DMSO-*d*<sub>6</sub>) 2-fluoro-5-(4-fluorophenyl) furan (7d)

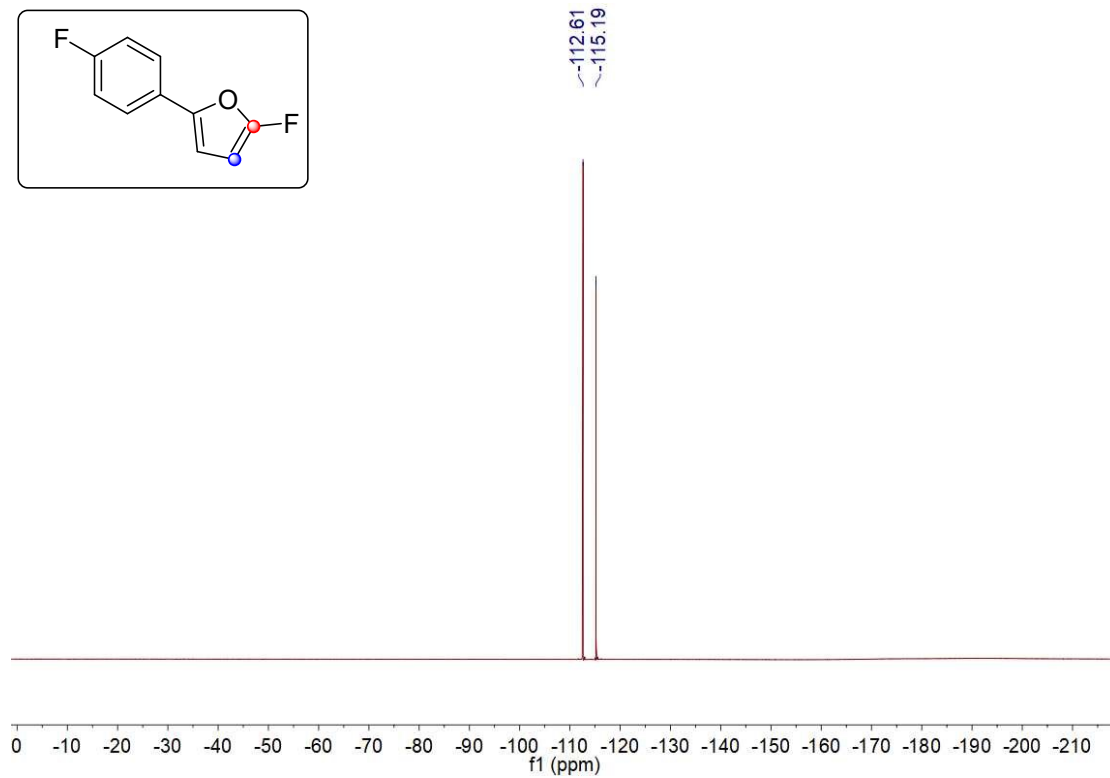

<sup>1</sup>H spectrum (CDCl<sub>3</sub>) 2-(4-chlorophenyl)-5-fluorofuran (7e)

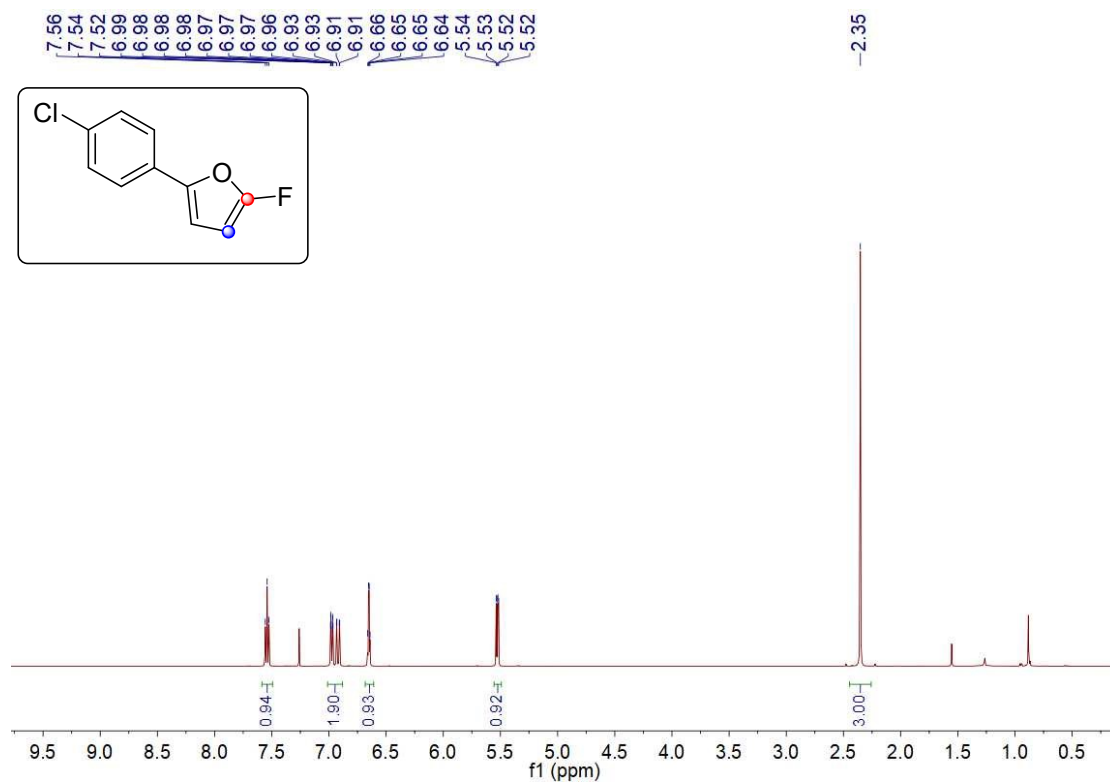

<sup>13</sup>C spectrum (CDCl<sub>3</sub>) 2-(4-chlorophenyl)-5-fluorofuran (7e)

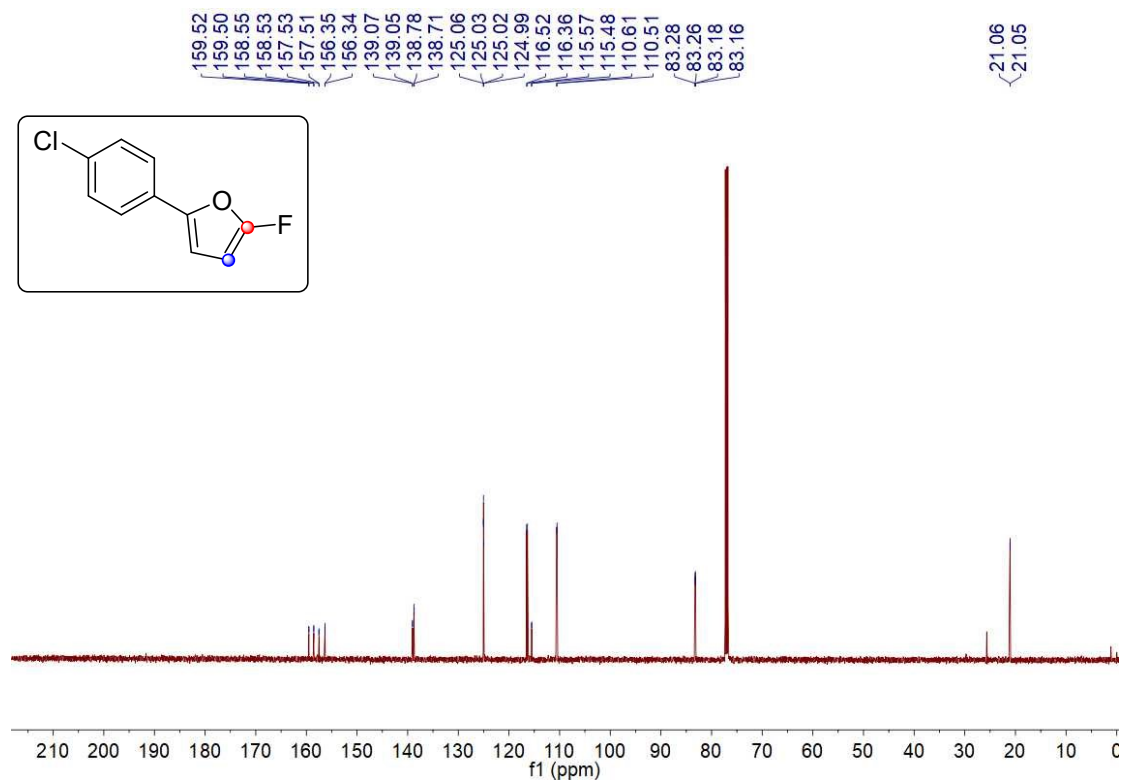

<sup>19</sup>F spectrum (CDCl<sub>3</sub>) 2-(4-chlorophenyl)-5-fluorofuran (7e)



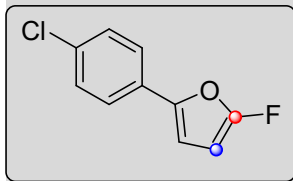

$^1\text{H}$  spectrum ( $\text{CDCl}_3$ ) 2-(4-bromophenyl)-5-fluorofuran (7f)

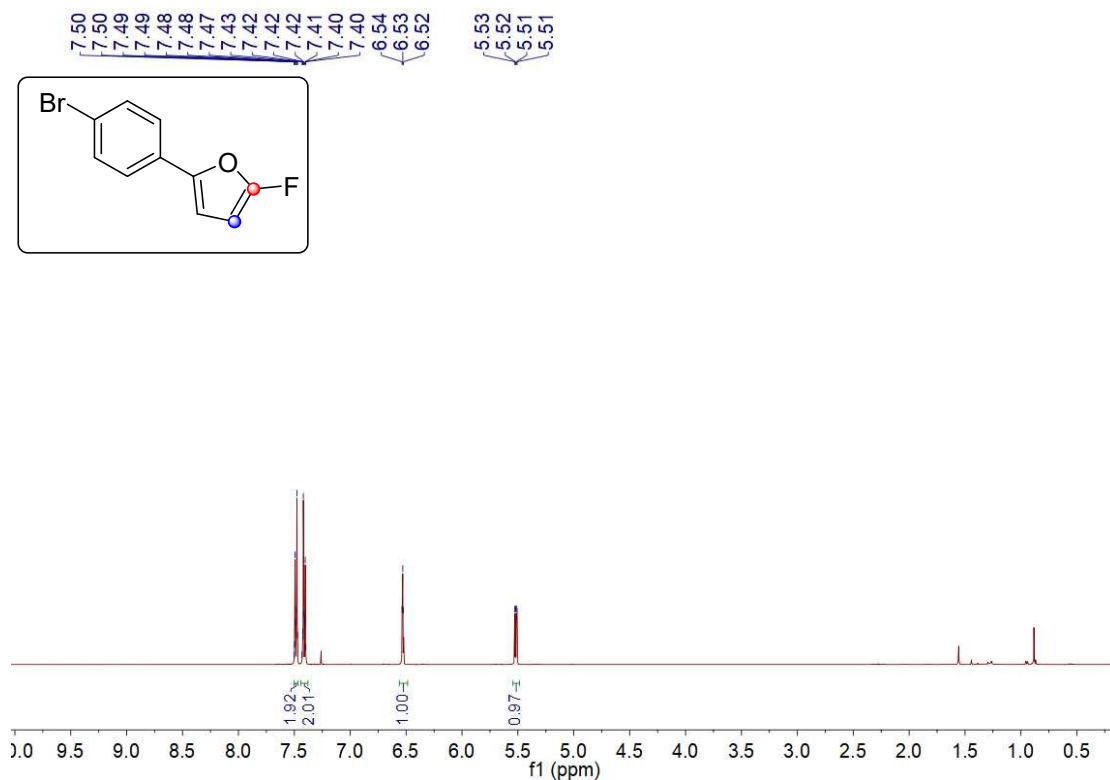

$^{13}\text{C}$  spectrum ( $\text{CDCl}_3$ ) 2-(4-bromophenyl)-5-fluorofuran (7f)

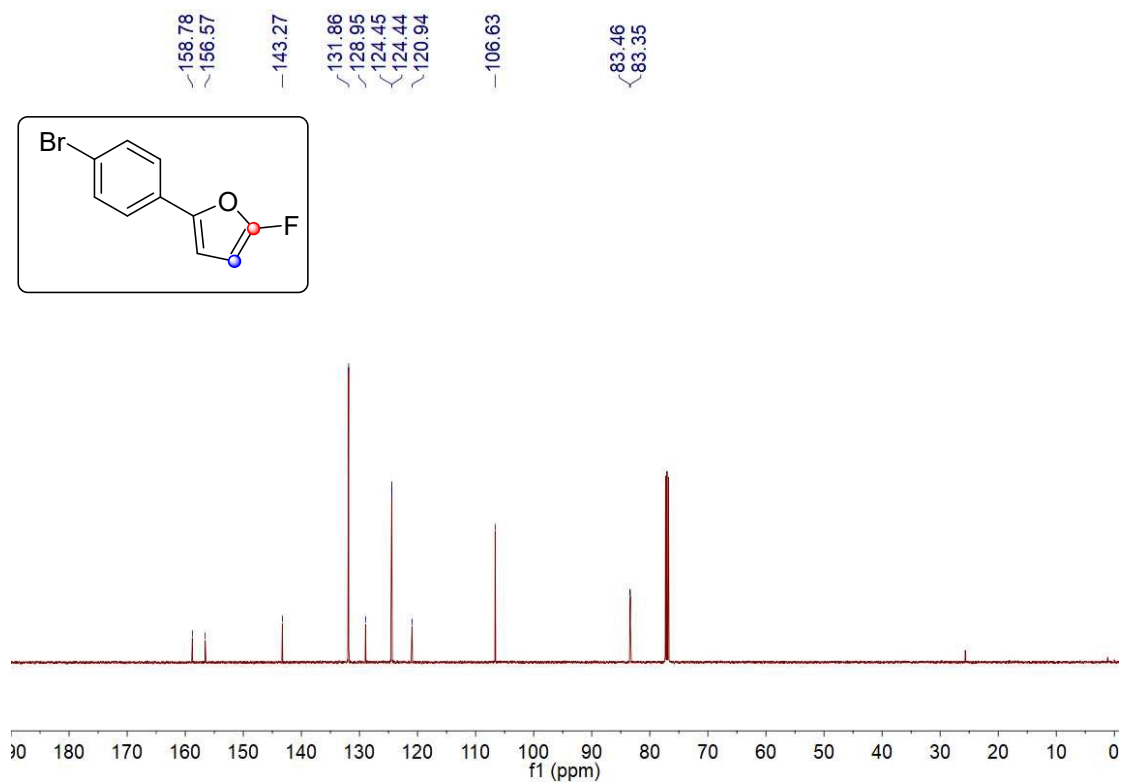

<sup>19</sup>F spectrum (CDCl<sub>3</sub>) 2-(4-bromophenyl)-5-fluorofuran (7f)

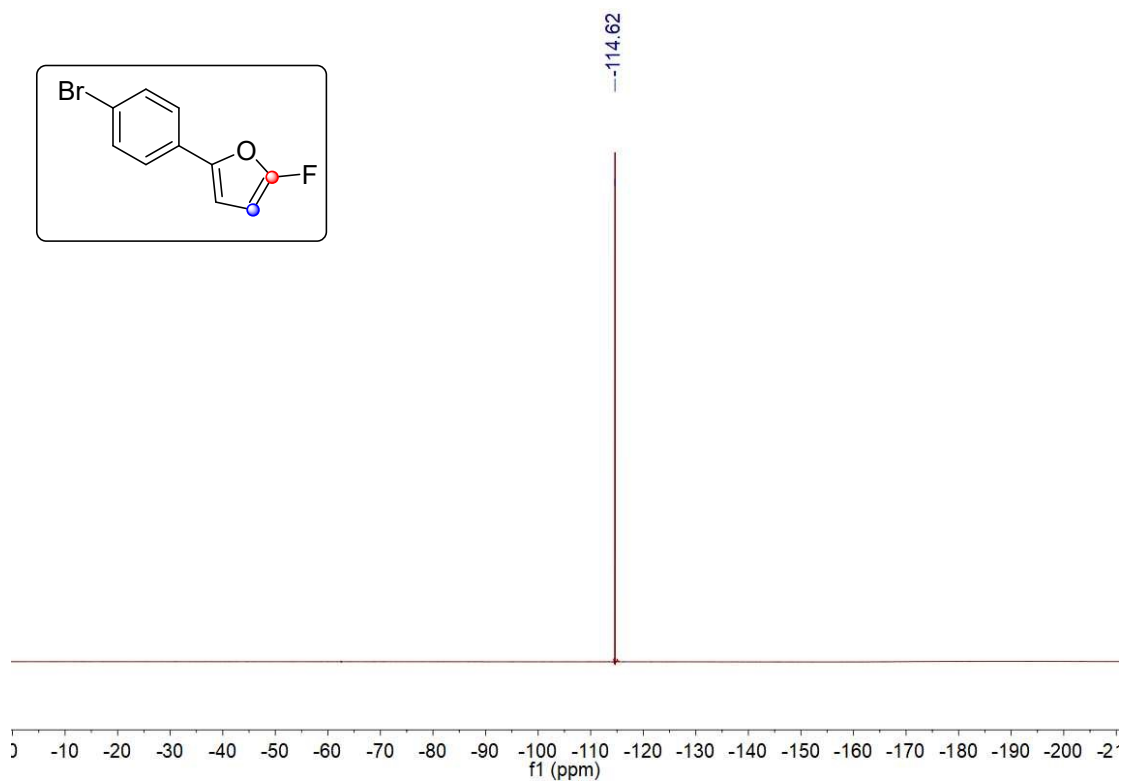

<sup>1</sup>H spectrum (DMSO-*d*<sub>6</sub>) 2-fluoro-5-(4-iodophenyl)furan (7g)

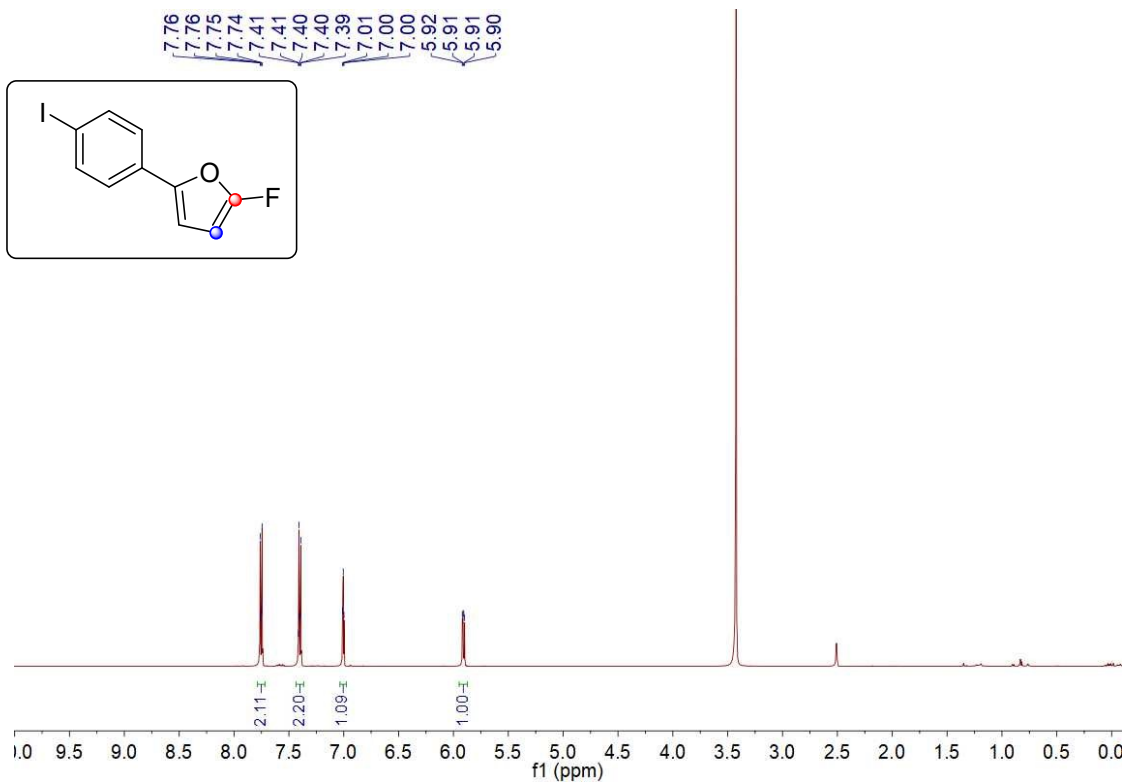

<sup>13</sup>C spectrum (DMSO-*d*<sub>6</sub>) 2-fluoro-5-(4-iodophenyl)furan (7g)

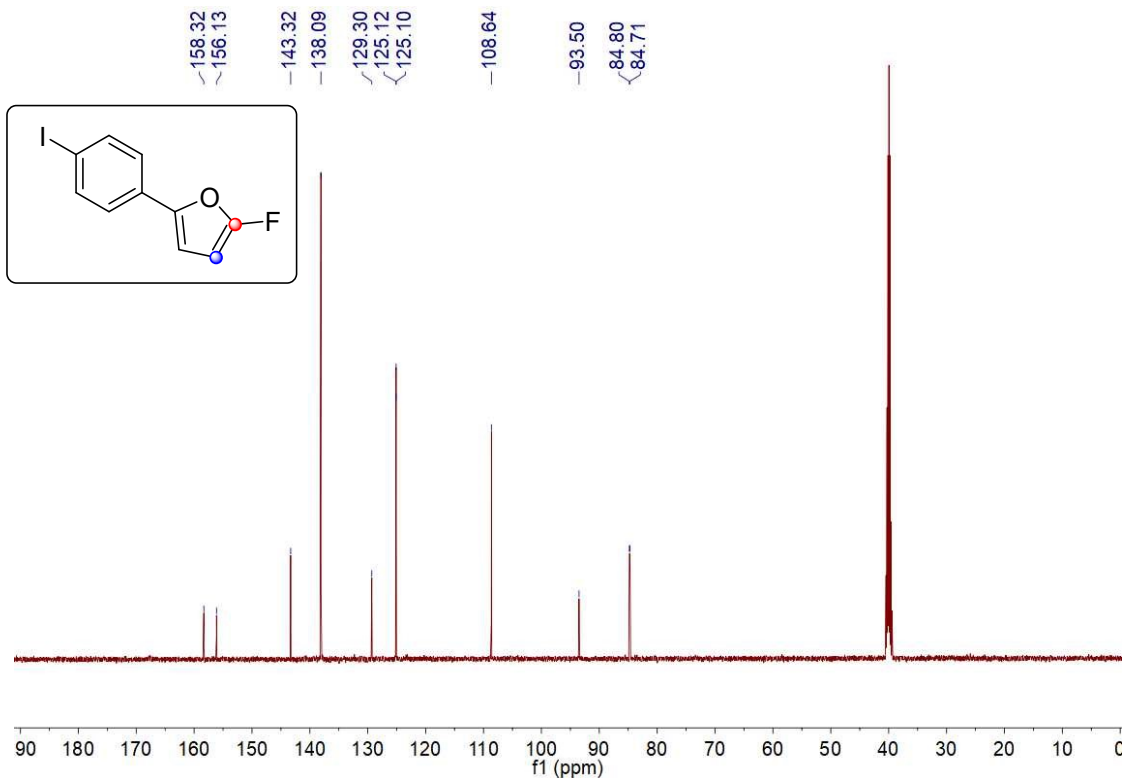

<sup>19</sup>F spectrum (DMSO-*d*<sub>6</sub>) 2-fluoro-5-(4-iodophenyl)furan (7g)

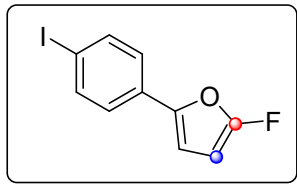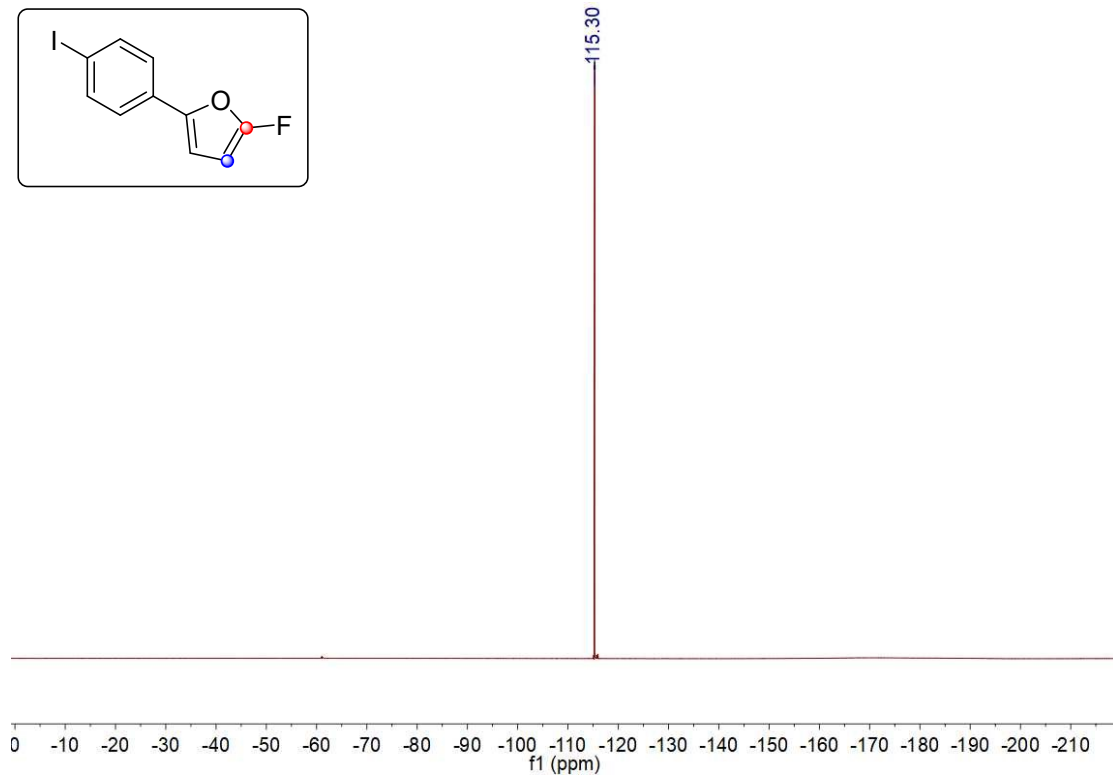

$^1\text{H}$  spectrum (DMSO- $d_6$ ) 2-fluoro-5-(4-(trifluoromethyl)phenyl)furan (7h)

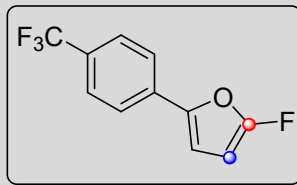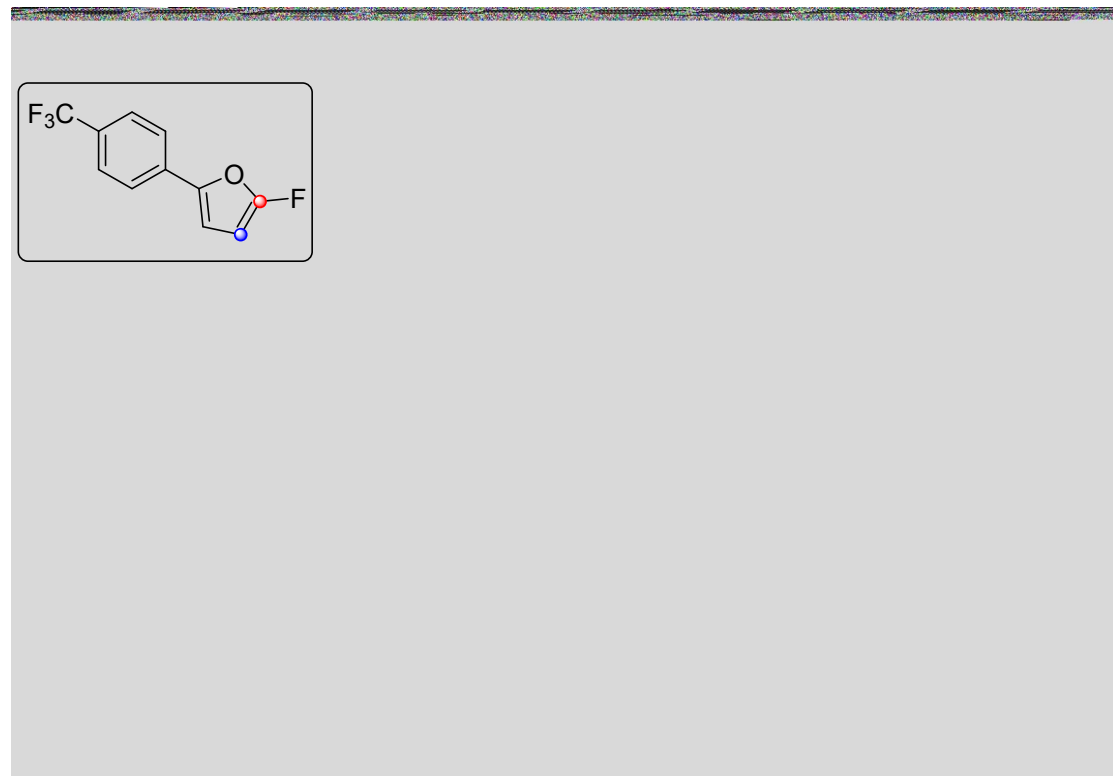

$^{13}\text{C}$  spectrum (DMSO- $d_6$ ) 2-fluoro-5-(4-(trifluoromethyl)phenyl)furan (7h)

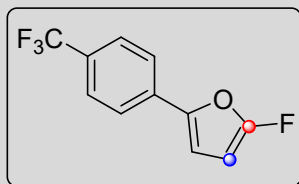

**$^{19}\text{F}$  spectrum (DMSO- $d_6$ ) 2-fluoro-5-(4-(trifluoromethyl)phenyl)furan (7h)**

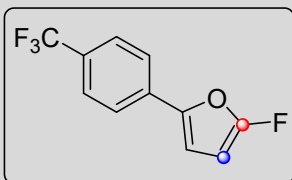

**$^1\text{H}$  spectrum (DMSO- $d_6$ ) 2-fluoro-5-(2-(trifluoromethyl)phenyl)furan (7i)**

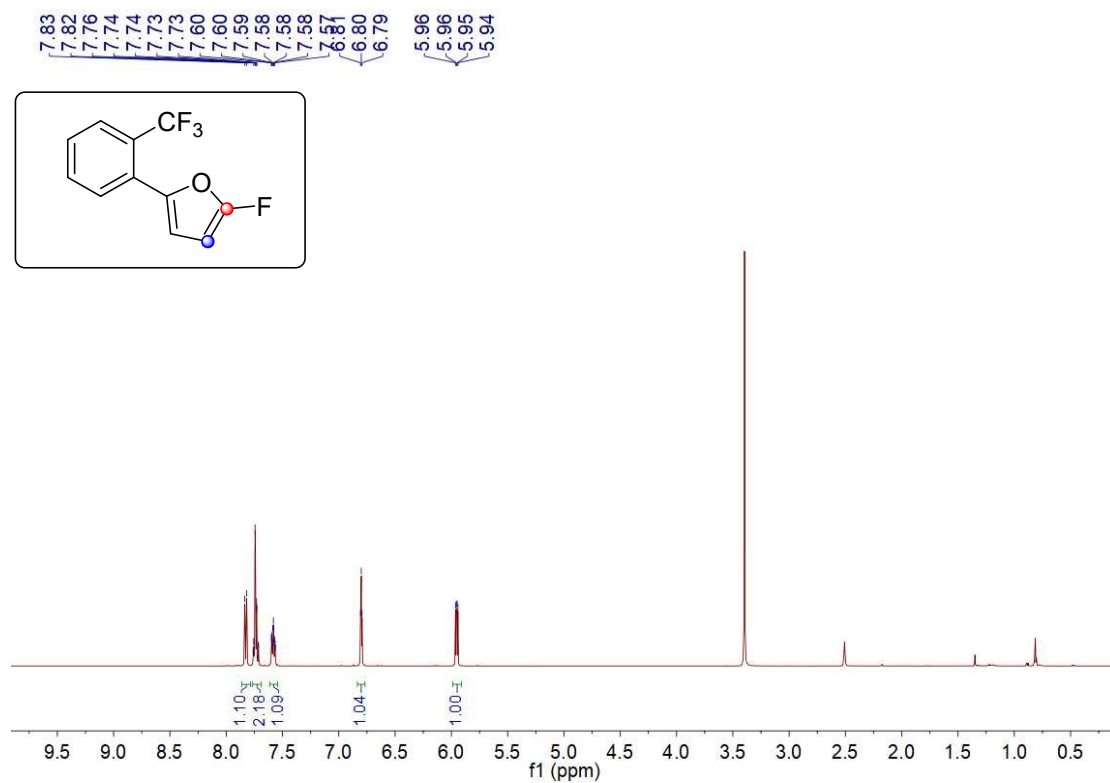

**<sup>13</sup>C spectrum (DMSO-*d*<sub>6</sub>) 2-fluoro-5-(2-(trifluoromethyl)phenyl)furan (7i)**

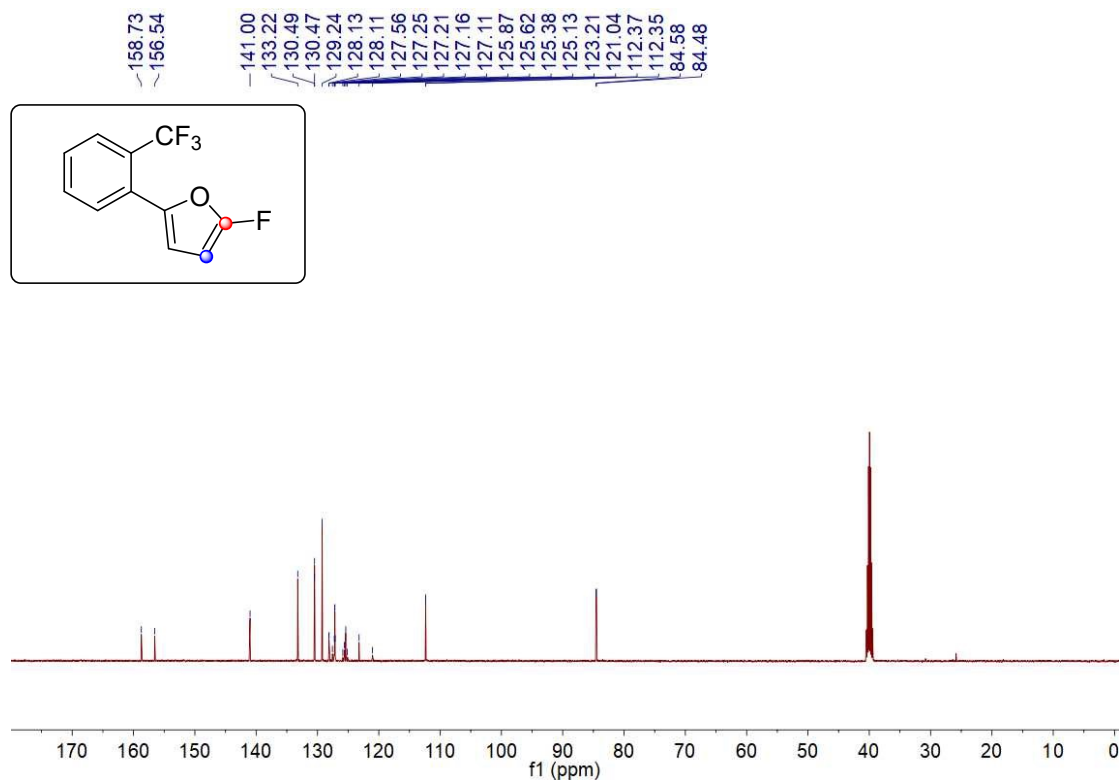

**<sup>19</sup>F spectrum (DMSO-*d*<sub>6</sub>) 2-fluoro-5-(2-(trifluoromethyl)phenyl)furan (7i)**

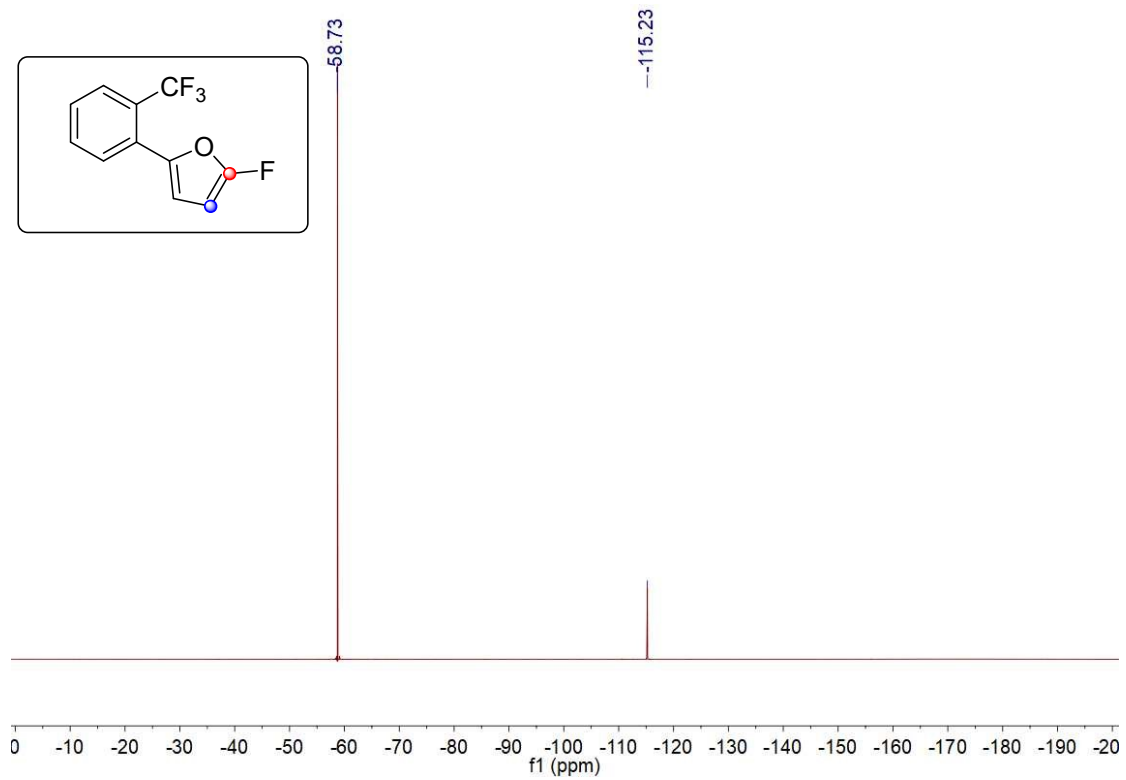

**<sup>1</sup>H spectrum (DMSO-*d*<sub>6</sub>) 2-fluoro-5-(naphthalen-2-yl)furan (7j)**

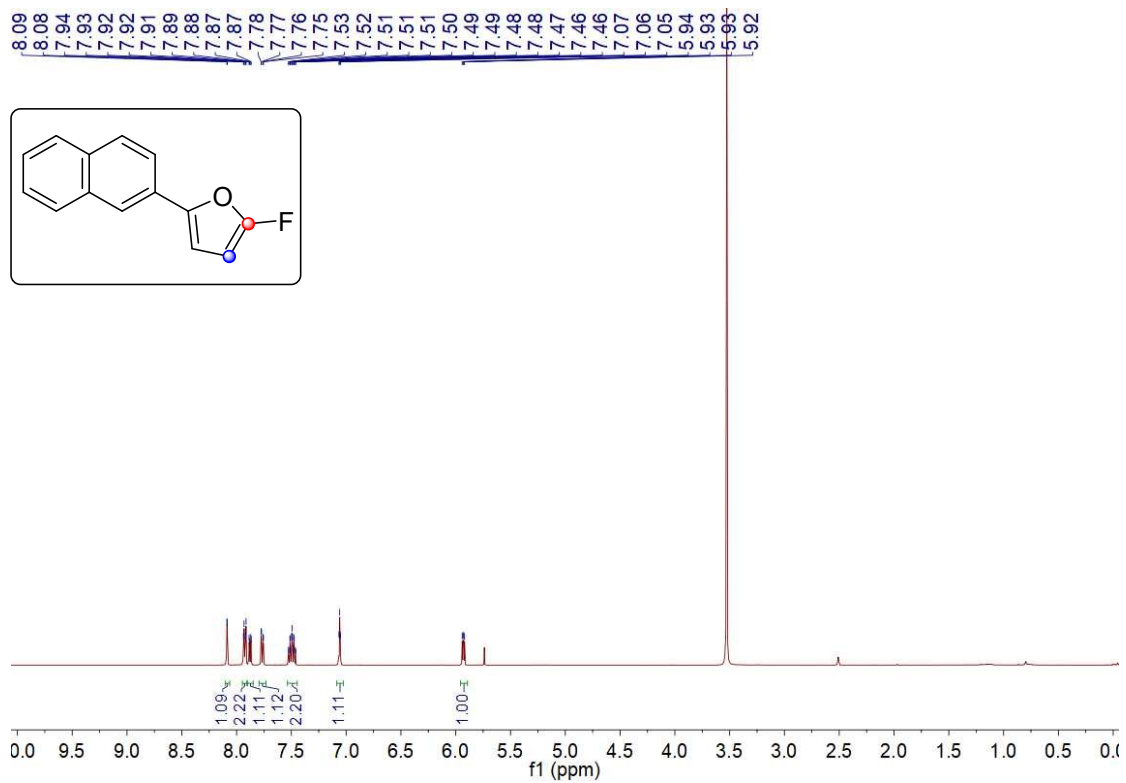

**<sup>13</sup>C spectrum (DMSO-*d*<sub>6</sub>) 2-fluoro-5-(naphthalen-2-yl)furan (7j)**

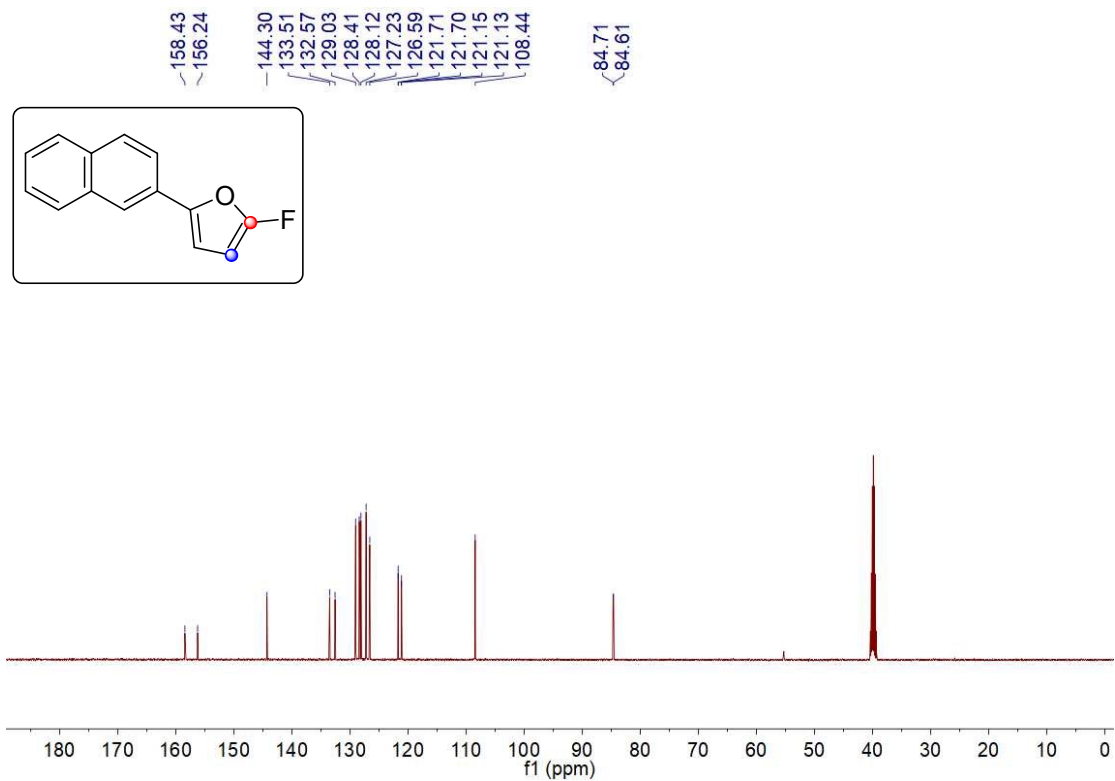

<sup>19</sup>F spectrum (DMSO-*d*<sub>6</sub>) 2-fluoro-5-(naphthalen-2-yl)furan (7j)

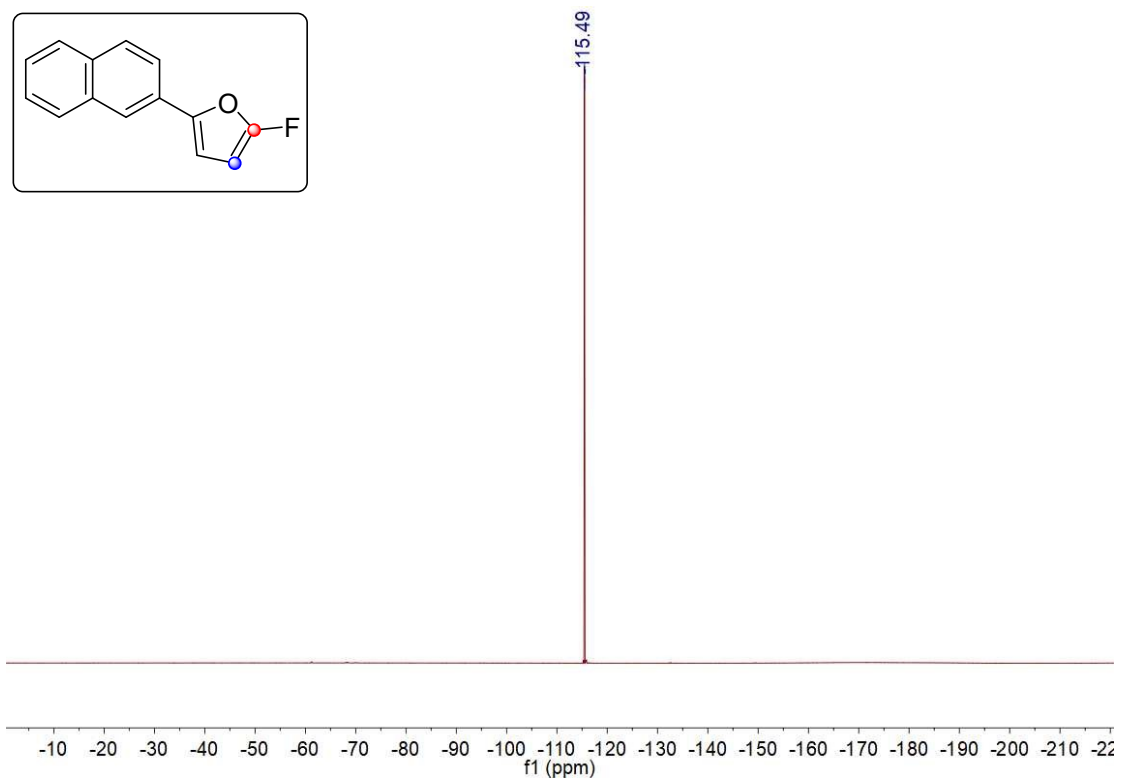

<sup>1</sup>H spectrum (DMSO-*d*<sub>6</sub>) 2-fluoro-5-(pyren-1-yl)furan (7k)



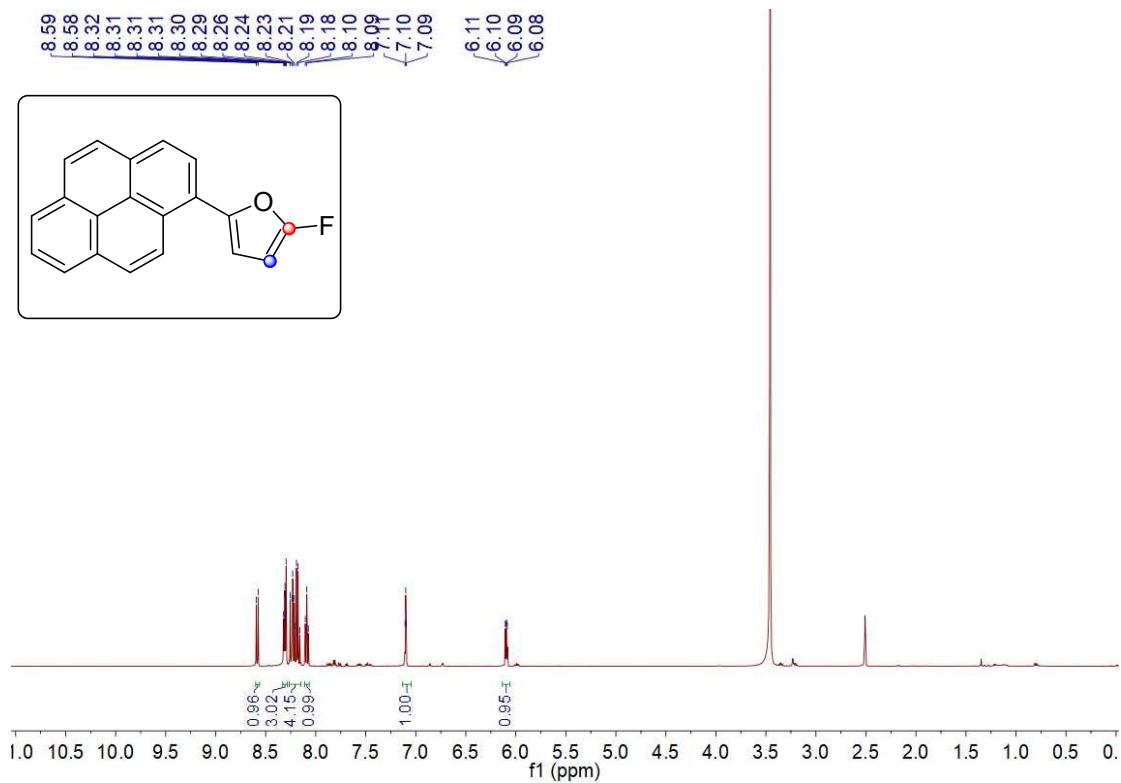

**<sup>13</sup>C spectrum (DMSO-*d*<sub>6</sub>) 2-fluoro-5-(pyren-1-yl)furan (7k)**

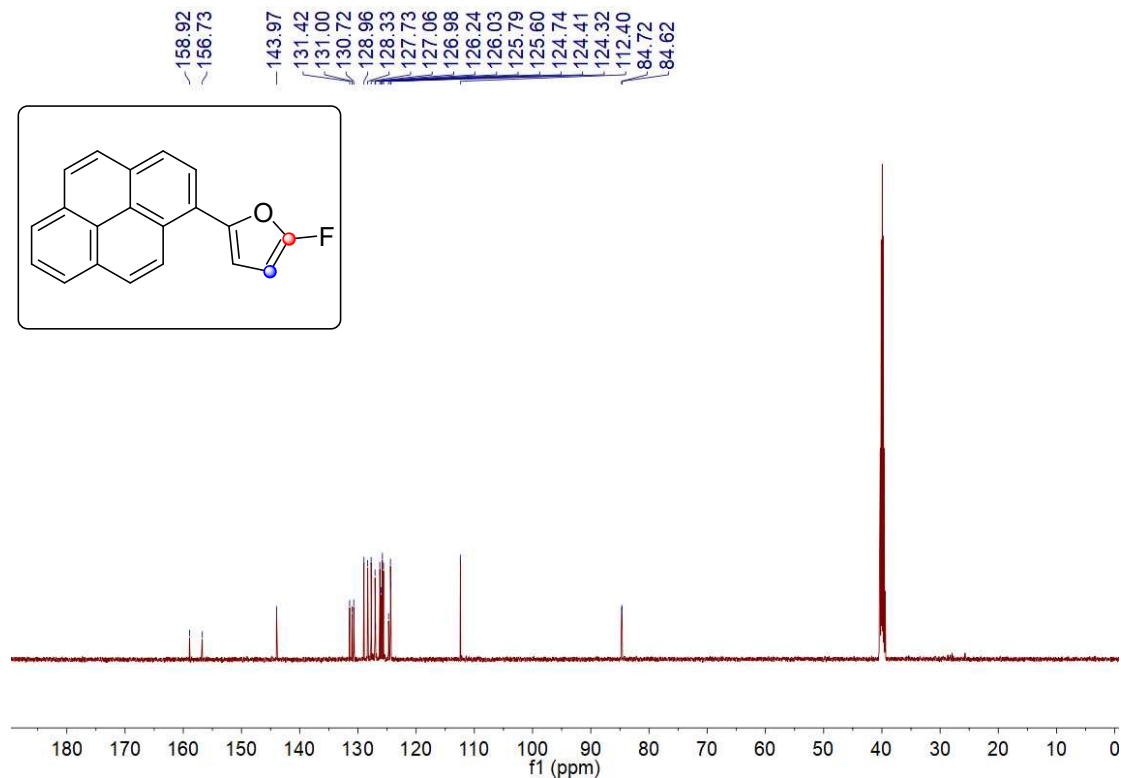

**<sup>19</sup>F spectrum (DMSO-*d*<sub>6</sub>) 2-fluoro-5-(pyren-1-yl)furan (7k)**

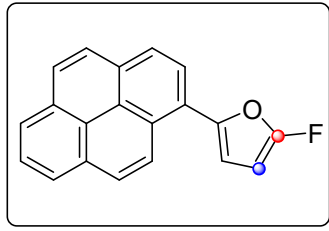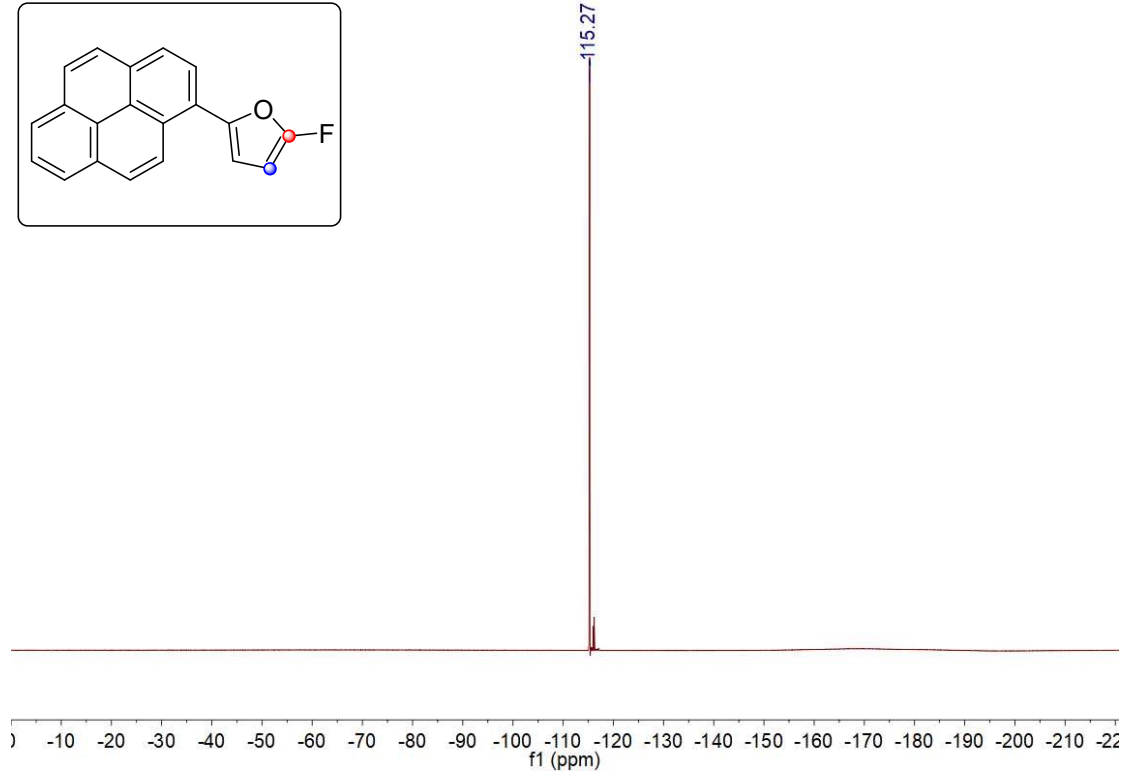

$^1\text{H}$  spectrum (DMSO- $d_6$ ) 2-(9H-fluoren-2-yl)-5-fluorofuran (7I)

7.93  
7.92  
7.91  
7.89  
7.83  
7.83  
7.66  
7.66  
7.64  
7.60  
7.58  
7.41  
7.40  
7.39  
7.39  
7.38  
7.37  
7.34  
7.34  
7.33  
7.32  
7.31  
7.31  
7.00  
6.99  
6.99

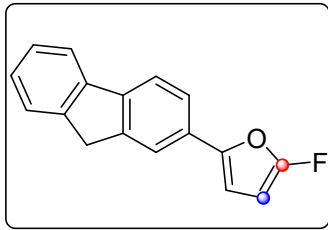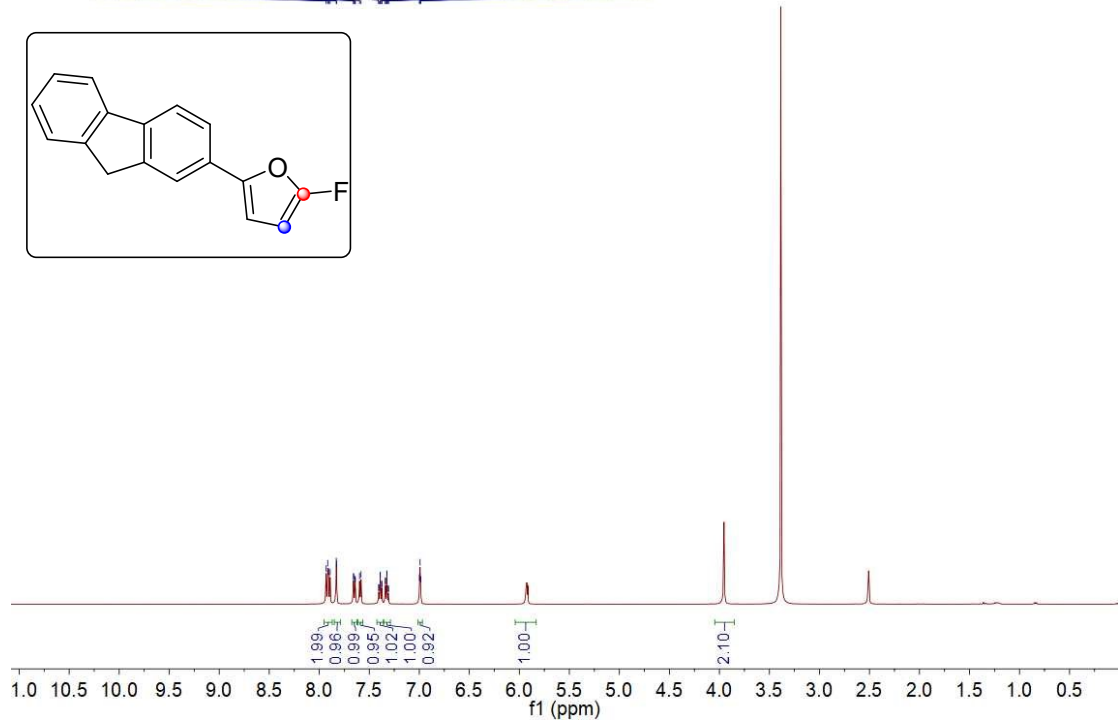

$^{13}\text{C}$  spectrum (DMSO- $d_6$ ) 2-(9H-fluoren-2-yl)-5-fluorofuran (7I)

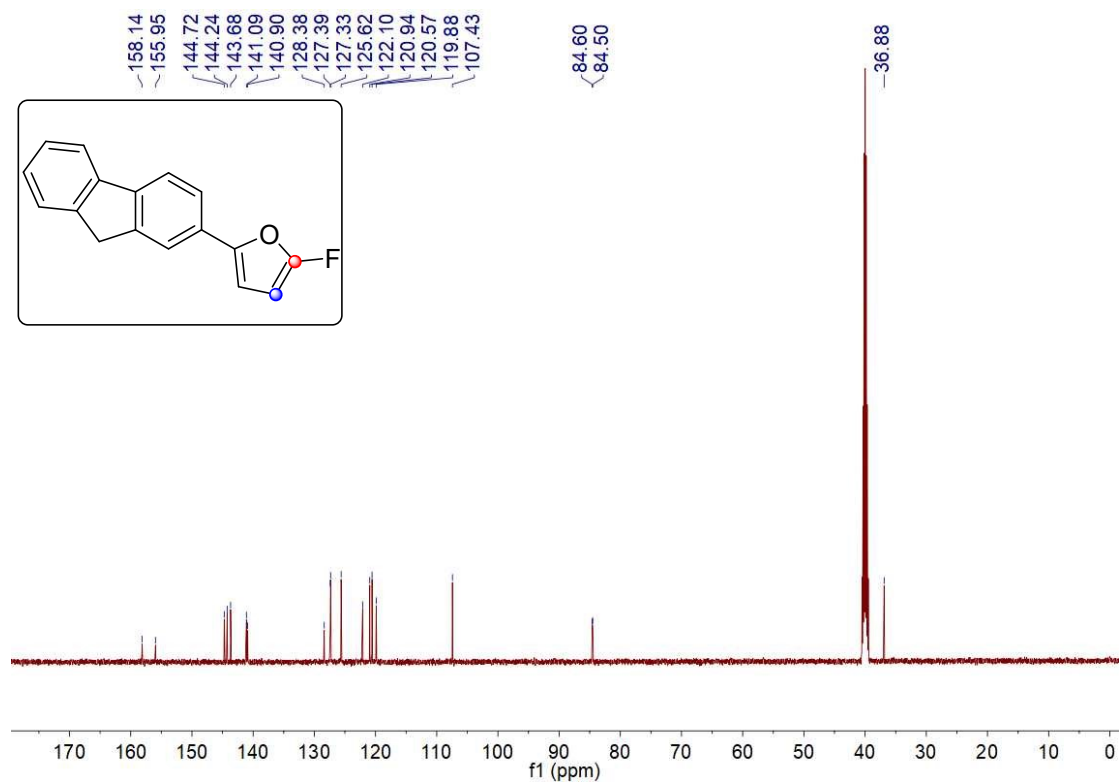

**<sup>19</sup>F spectrum (DMSO-*d*<sub>6</sub>) 2-(9H-fluoren-2-yl)-5-fluorofuran (7l)**

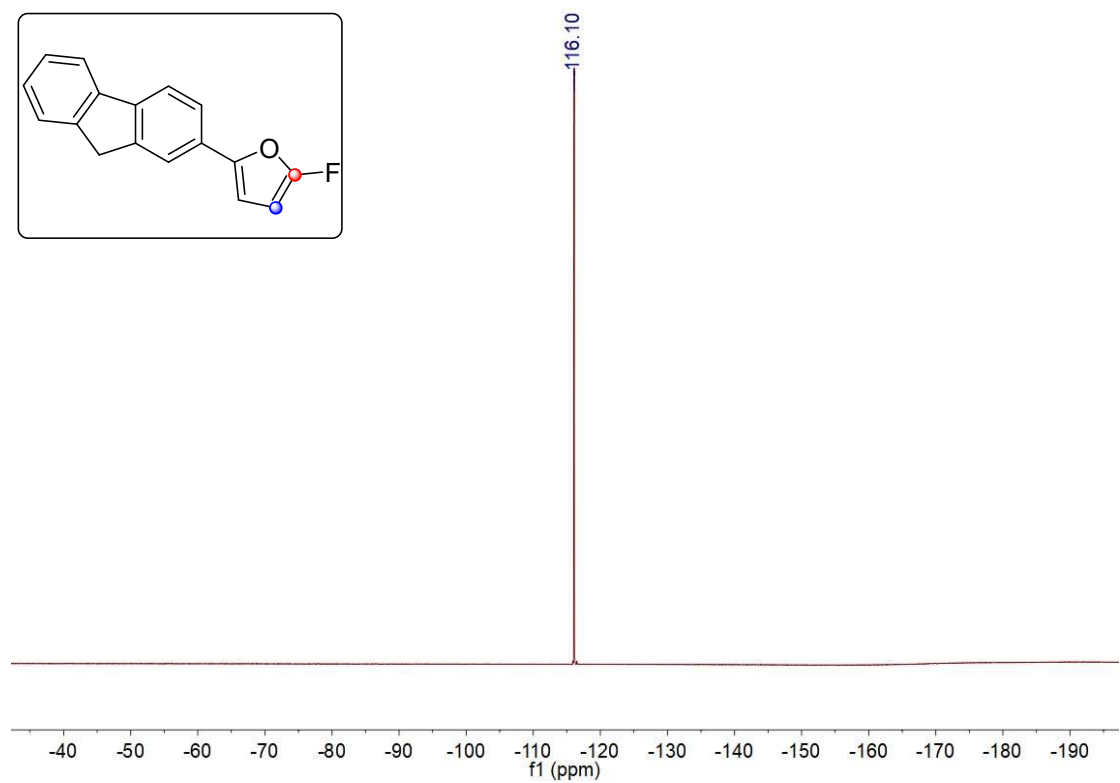

**<sup>13</sup>C spectrum (DMSO-*d*<sub>6</sub>) 2-(9H-fluoren-2-yl)-5-fluorofuran (7l)**

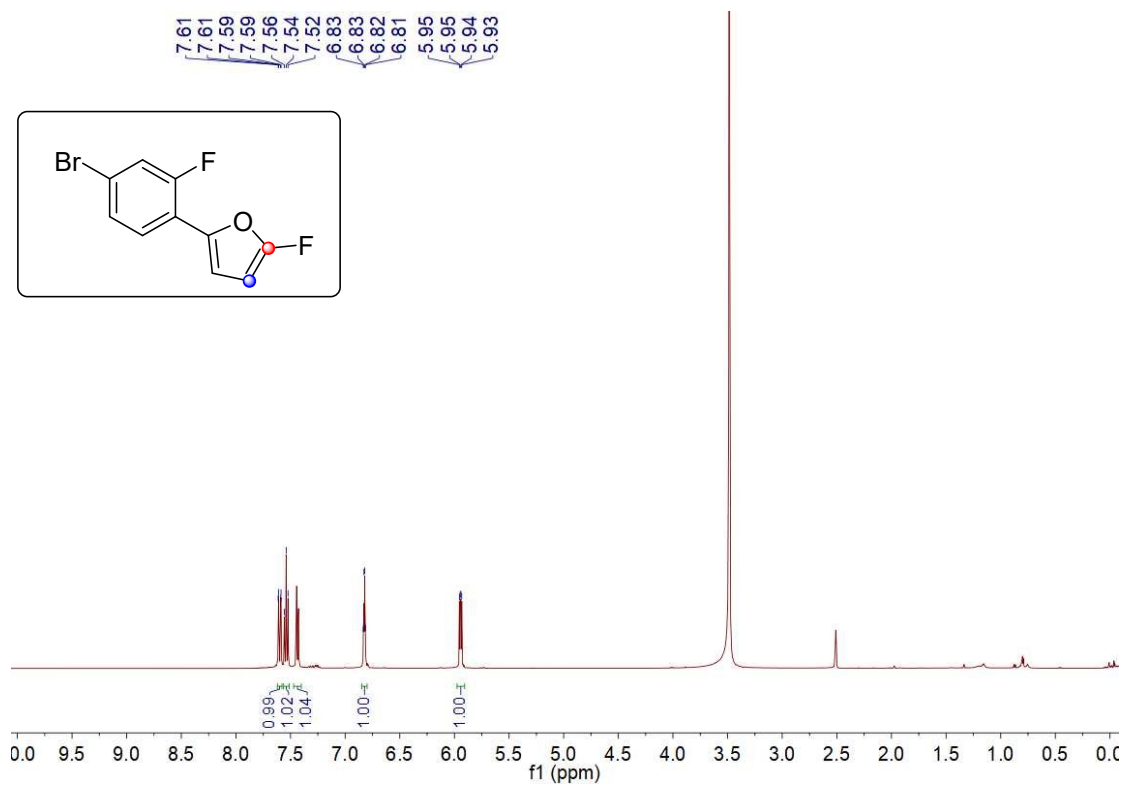

**<sup>13</sup>C spectrum (DMSO-*d*<sub>6</sub>) 2-(4-bromo-2-fluorophenyl)-5-fluorofuran (7m)**

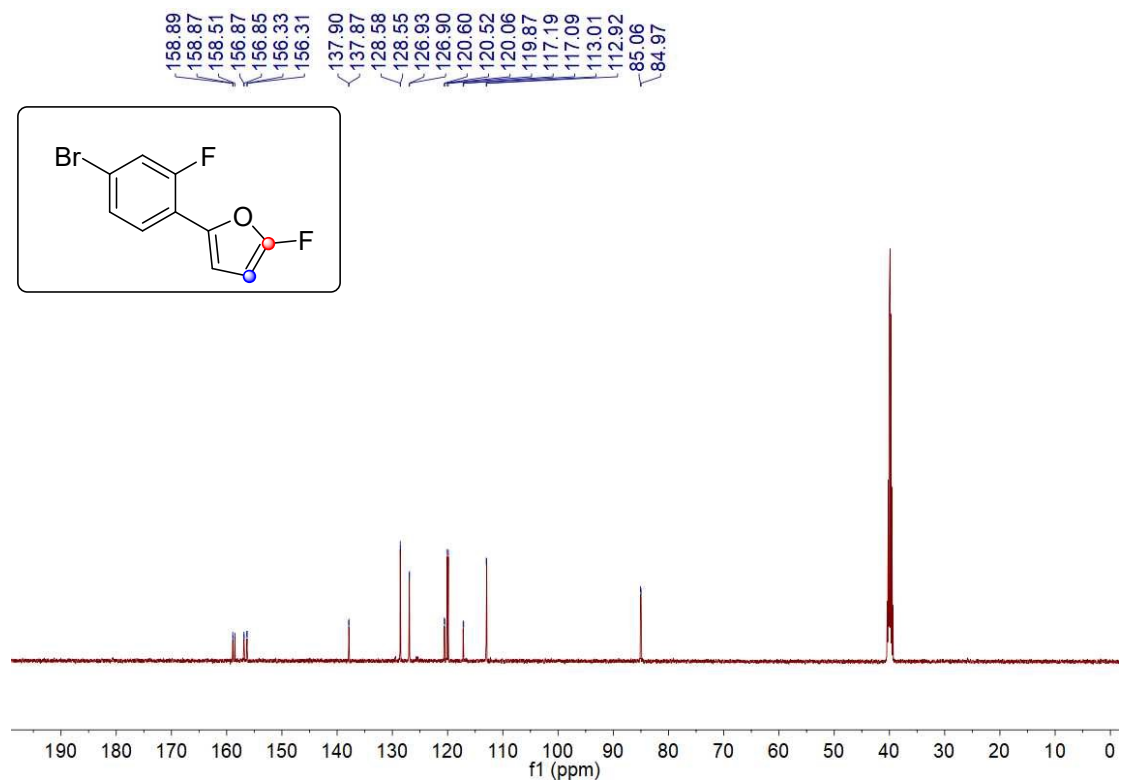

**<sup>19</sup>F spectrum (DMSO-*d*<sub>6</sub>) 2-(4-bromo-2-fluorophenyl)-5-fluorofuran (7m)**

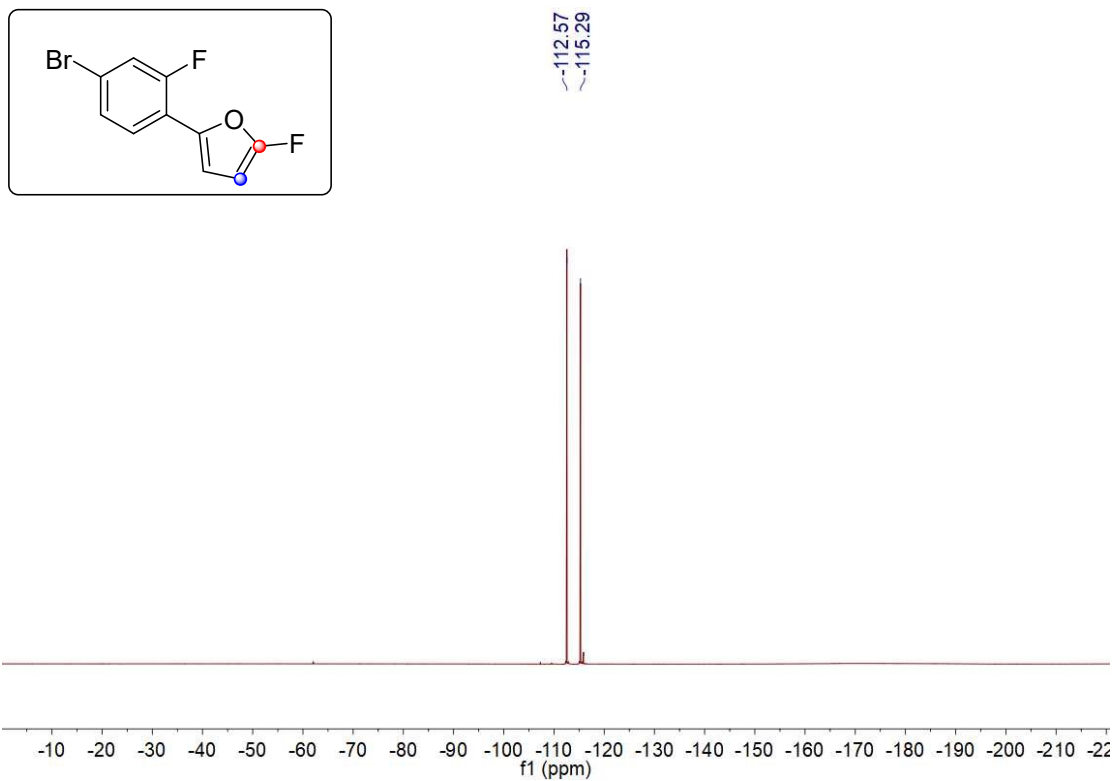

$^1\text{H}$  spectrum ( $\text{CDCl}_3$ ) 2-fluoro-5-(2-fluoro-4-methylphenyl)furan (7n)

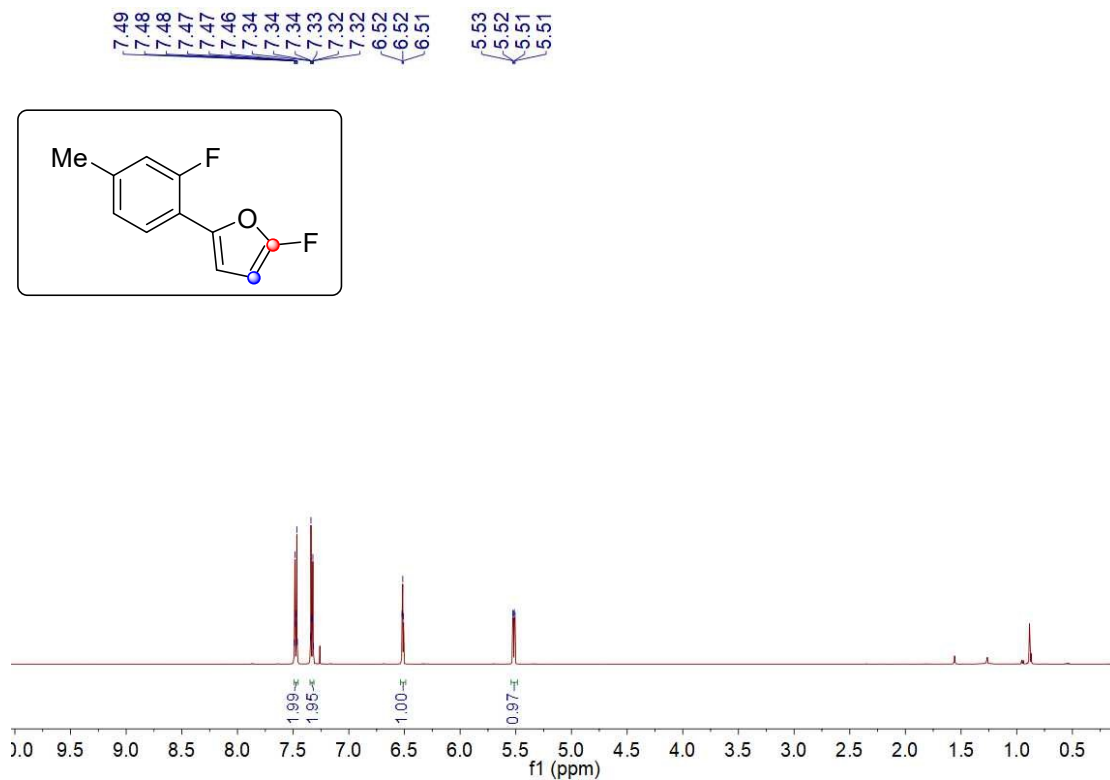

$^{13}\text{C}$  spectrum ( $\text{CDCl}_3$ ) 2-fluoro-5-(2-fluoro-4-methylphenyl)furan (7n)

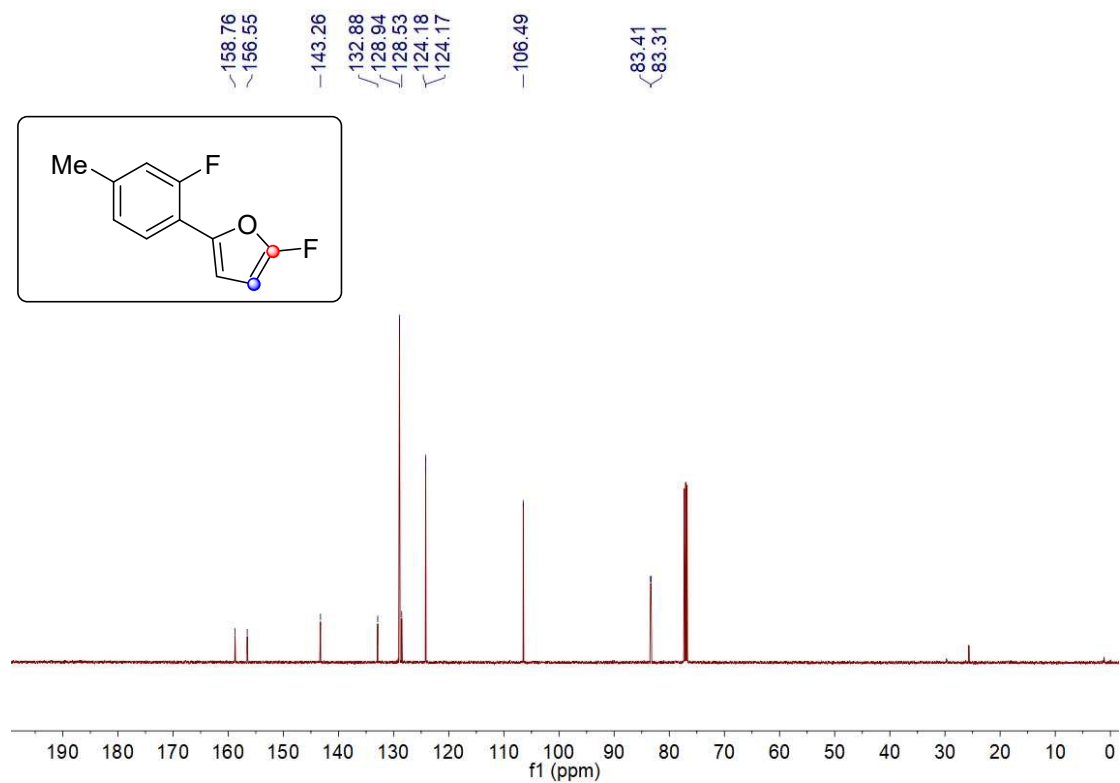

<sup>19</sup>F spectrum (CDCl<sub>3</sub>) 2-fluoro-5-(2-fluoro-4-methylphenyl)furan (7n)

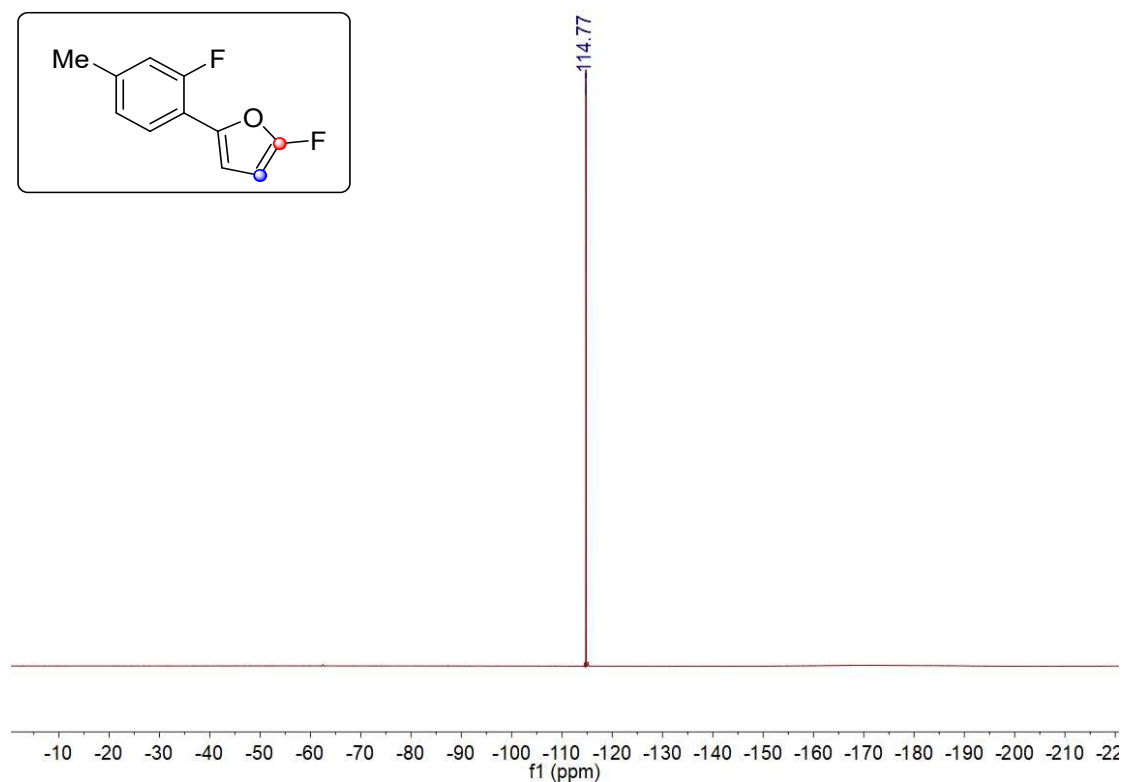

<sup>1</sup>H spectrum (DMSO-*d*<sub>6</sub>) 2-fluoro-5-(3-fluoro-4-methoxyphenyl)furan (7o)

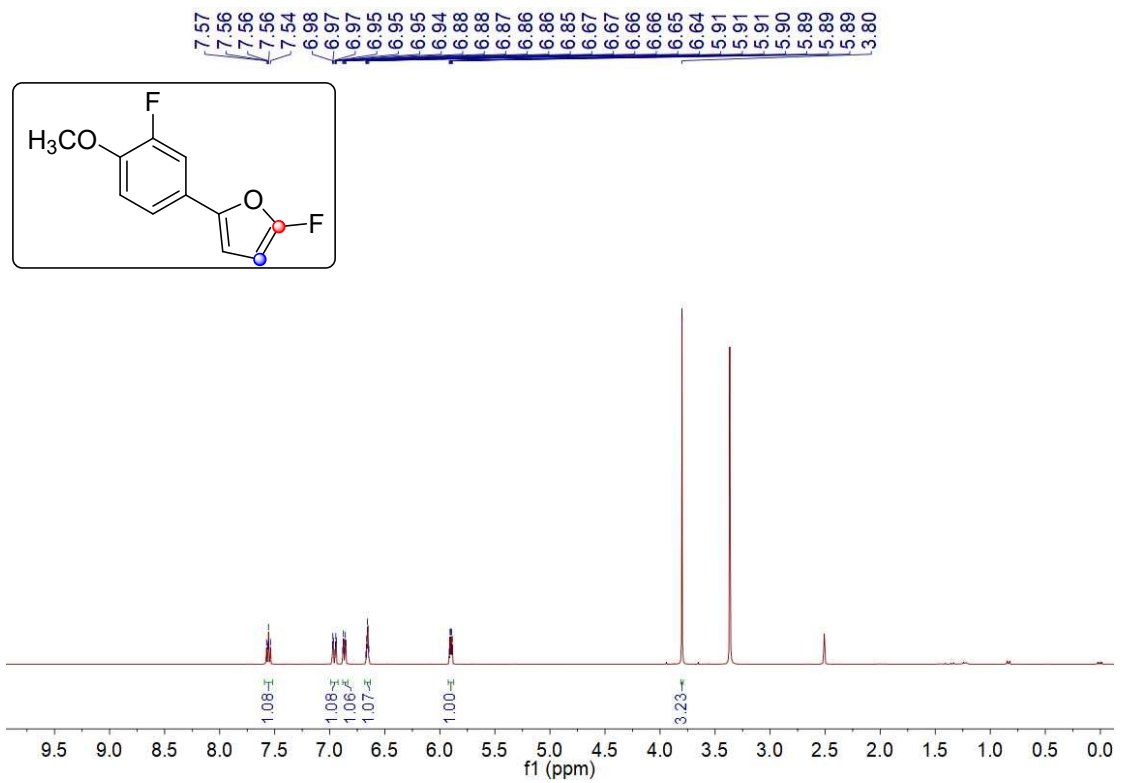

**<sup>13</sup>C spectrum (DMSO-*d*<sub>6</sub>) 2-fluoro-5-(3-fluoro-4-methoxyphenyl)furan (7o)**

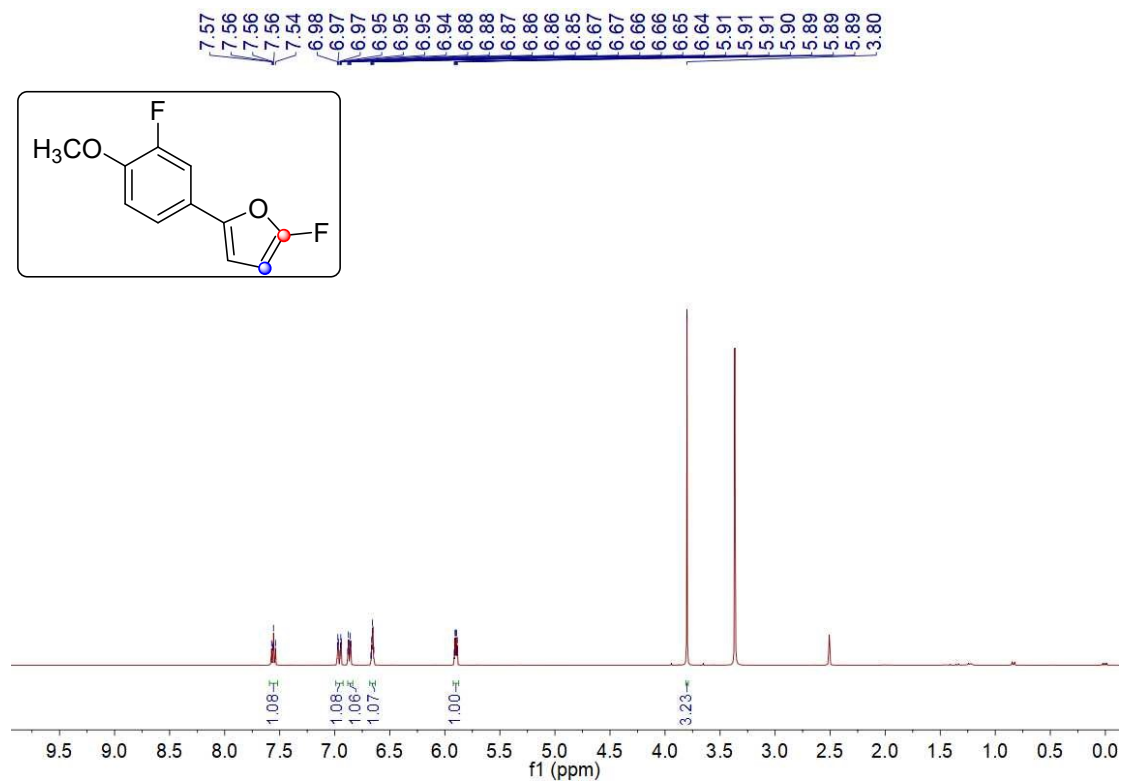

**<sup>19</sup>F spectrum (DMSO-*d*<sub>6</sub>) 2-fluoro-5-(3-fluoro-4-methoxyphenyl)furan (7o)**

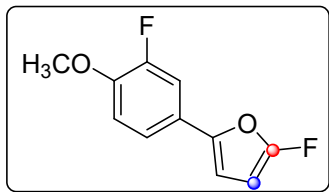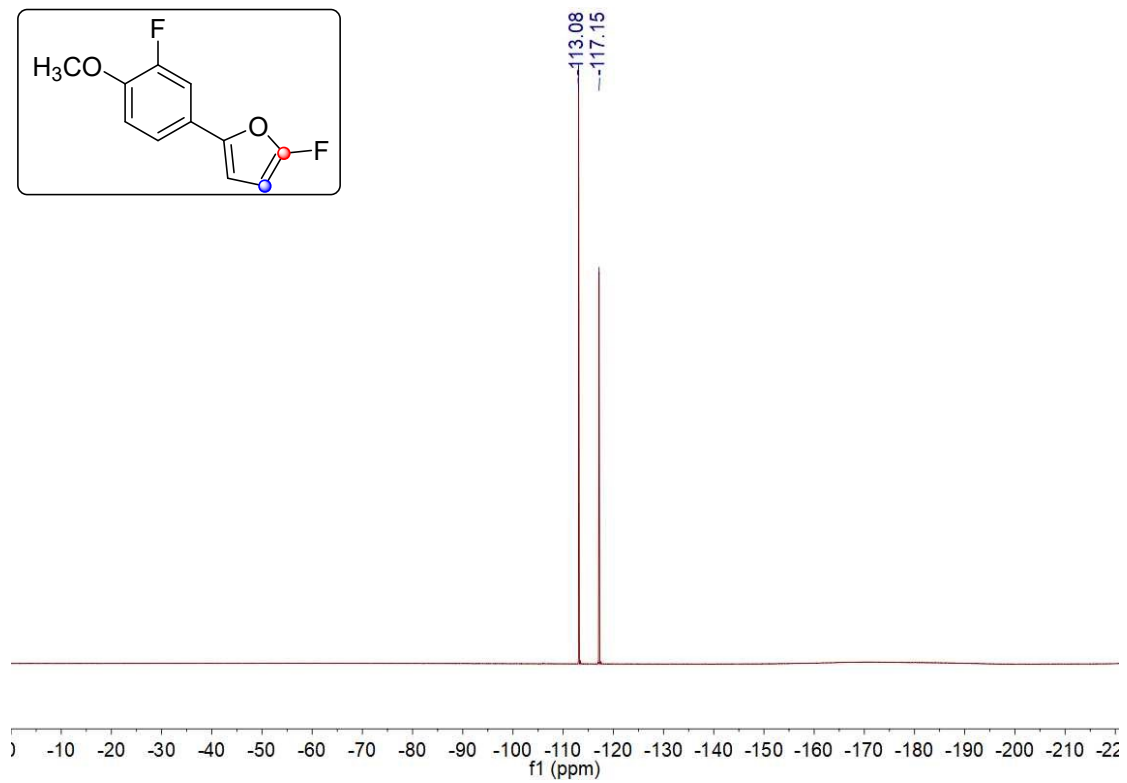

Supplement: d2qo00468b1.pdf [file d2qo00468b1.pdf]
